# Supplementary material for: Identification of a DNA methylation signature in blood cells from persons with Down Syndrome
Source: Aging (Albany NY). 2014 Jan 8;7(2):82–93. doi: 10.18632/aging.100715 (PMC4359691; doi:10.18632/aging.100715)
Supplement: Supplementary file 1 [file aging-07-0082-s001.xls]

## Sheet: ClassA_BOP_Greater2
BOP	CHR	UCSC_CPG_ISLANDS_NAME	RELATION_TO_UCSC_CPG_ISLAND	GeneName	DSvsDSS_Manova	DSvsDSS_Manova_FDR	n.CpG	effective_n.CpG	ID_REF_Best_CpG	MAPINFO	DSvsDSS_Anova	DSvsDSS_Anova_FDR	DS_mean	DSM_mean	DSS_mean	Delta_DS_mean.DSS_mean	DS_sd	DSM_sd	DSS_sd	Bubble
chr5:176827081-176827754*Island	5	chr5:176827081-176827754	Island	PFN3	1.78817e-18	6.56447e-15	4	3	cg06847624	176827671	1.08724e-20	3.83168e-16	0.799682	0.428478	0.39234	0.407343	0.0731198	0.130198	0.0738264	2
chr13:113687421-113687828*S_Shore	13	chr13:113687421-113687828	S_Shore	MCF2L	3.88876e-18	1.2459e-14	8	7	cg01435643	113689776	7.21861e-20	1.81714e-15	0.184239	0.416366	0.458419	-0.27418	0.0560422	0.0799618	0.0714909	2
chr3:194117601-194118988*S_Shore	3	chr3:194117601-194118988	S_Shore	GP5	5.99244e-18	1.40208e-14	7	7	cg13185177	194119885	6.77166e-20	1.81714e-15	0.291529	0.45006	0.494031	-0.202501	0.0582999	0.0711438	0.0493069	2
chr12:121975028-121976140*N_Shore	12	chr12:121975028-121976140	N_Shore	KDM2B	9.02765e-18	1.80769e-14	4	4	cg26995224	121974146	9.46378e-20	2.08453e-15	0.742346	0.48744	0.487481	0.254865	0.0370566	0.0875053	0.0494901	2
chr1:36786500-36789402*Island	1	chr1:36786500-36789402	Island	C1orf113	5.00982e-17	7.26558e-14	10	9	cg02993069	36786777	2.21384e-17	2.05317e-13	0.293163	0.0946235	0.0927454	0.200417	0.0538864	0.017592	0.0228333	2
chr16:2028987-2030710*Island	16	chr16:2028987-2030710	Island	NOXO1	1.003e-16	1.29955e-13	6	6	cg04599341	2029855	1.01565e-17	1.05276e-13	0.662001	0.434659	0.414647	0.247355	0.052707	0.0420286	0.0411264	2
chr6:31939730-31940559*N_Shore	6	chr6:31939730-31940559	N_Shore	DOM3Z	4.59744e-16	4.73754e-13	34	31	cg12776033	31939059	2.1455e-16	1.0671e-12	0.694636	0.597498	0.605417	0.0892188	0.0326615	0.0457215	0.0292338	2
chr6:31939730-31940559*N_Shore	6	chr6:31939730-31940559	N_Shore	STK19	4.59744e-16	4.73754e-13	34	31	cg12776033	31939059	2.1455e-16	1.0671e-12	0.694636	0.597498	0.605417	0.0892188	0.0326615	0.0457215	0.0292338	2
chr2:54086776-54087266*Island	2	chr2:54086776-54087266	Island	LOC100302652	2.04555e-15	1.55366e-12	10	9	cg12451530	54087209	3.4064e-15	9.5277e-12	0.669102	0.894101	0.879943	-0.210841	0.0589076	0.0804062	0.0412444	2
chr2:54086776-54087266*Island	2	chr2:54086776-54087266	Island	GPR75	2.04555e-15	1.55366e-12	10	9	cg12451530	54087209	3.4064e-15	9.5277e-12	0.669102	0.894101	0.879943	-0.210841	0.0589076	0.0804062	0.0412444	2
chr7:27143181-27143479*Island	7	chr7:27143181-27143479	Island	HOXA2	2.11987e-15	1.56294e-12	7	7	cg04027736	27143403	1.21956e-16	7.41033e-13	0.375051	0.637525	0.620265	-0.245213	0.0598155	0.0874731	0.0395626	2
chr11:118781060-118781732*Island	11	chr11:118781060-118781732	Island	BCL9L	8.2762e-15	5.34197e-12	7	7	cg03780927	118781150	6.01216e-17	4.07465e-13	0.501958	0.265758	0.241746	0.260212	0.0593657	0.0614021	0.0473737	2
chr22:50705406-50706553*Island	22	chr22:50705406-50706553	Island	MAPK11	1.31537e-14	7.62445e-12	4	4	cg16054907	50706065	8.4468e-16	3.23569e-12	0.978589	0.815589	0.809123	0.169466	0.015964	0.0893517	0.0511903	2
chr1:3163969-3164643*S_Shore	1	chr1:3163969-3164643	S_Shore	PRDM16	2.31341e-14	1.17818e-11	3	3	cg04873098	3165191	6.27631e-16	2.63323e-12	0.436034	0.668305	0.696762	-0.260728	0.0721646	0.0643026	0.045134	2
chr12:119772353-119772594*Island	12	chr12:119772353-119772594	Island	CCDC60	4.21063e-14	1.82749e-11	5	5	cg26365998	119772364	4.54187e-16	1.95202e-12	0.398437	0.239161	0.223502	0.174935	0.0470925	0.0356218	0.0269578	2
chr16:979422-979663*Island	16	chr16:979422-979663	Island	LMF1	9.75822e-14	4.05382e-11	3	3	cg05724492	979662	2.28029e-14	4.61854e-11	0.60874	0.945856	0.954169	-0.345428	0.0988935	0.0716877	0.0521356	2
chr8:144808221-144810978*Island	8	chr8:144808221-144810978	Island	FAM83H	1.75088e-13	6.75107e-11	8	7	cg25468618	144810034	2.71535e-14	5.25796e-11	0.879017	0.625302	0.602029	0.276988	0.0709613	0.0938392	0.0488529	2
chr2:145281736-145282269*N_Shelf	2	chr2:145281736-145282269	N_Shelf	ZEB2	4.05765e-13	1.34906e-10	9	9	cg00602811	145278564	1.04679e-13	1.67687e-10	0.649146	0.342191	0.441941	0.207205	0.0444045	0.0644968	0.0801974	2
chr9:34370773-34372902*Island	9	chr9:34370773-34372902	Island	KIAA1161	6.58676e-13	2.12965e-10	8	7	cg01327147	34371380	1.62732e-13	2.4301e-10	0.879708	0.694495	0.638632	0.241076	0.0248894	0.121372	0.0843187	2
chr6:33282855-33283196*Island	6	chr6:33282855-33283196	Island	TAPBP	1.3287e-12	3.84451e-10	21	19	cg18144560	33283070	1.71363e-13	2.49961e-10	0.632231	0.541025	0.539481	0.0927495	0.0311069	0.0492815	0.0365492	2
chr6:33282855-33283196*Island	6	chr6:33282855-33283196	Island	ZBTB22	1.3287e-12	3.84451e-10	21	19	cg18144560	33283070	1.71363e-13	2.49961e-10	0.632231	0.541025	0.539481	0.0927495	0.0311069	0.0492815	0.0365492	2
chr7:27143181-27143479*S_Shore	7	chr7:27143181-27143479	S_Shore	HOXA2	1.39424e-12	4.01439e-10	4	3	cg13985518	27143788	4.42017e-14	7.94778e-11	0.487905	0.699037	0.689371	-0.201466	0.0546393	0.0703833	0.0432383	2
chr22:51016253-51017020*Island	22	chr22:51016253-51017020	Island	CHKB-CPT1B	3.088e-12	8.37138e-10	10	10	cg06530441	51016950	8.14413e-12	7.05737e-09	0.639453	0.395692	0.357205	0.282248	0.0847937	0.0642752	0.0716435	2
chr22:51016253-51017020*Island	22	chr22:51016253-51017020	Island	CPT1B	3.088e-12	8.37138e-10	10	10	cg06530441	51016950	8.14413e-12	7.05737e-09	0.639453	0.395692	0.357205	0.282248	0.0847937	0.0642752	0.0716435	2
chr6:29600192-29600661*N_Shore	6	chr6:29600192-29600661	N_Shore	GABBR1	5.90125e-12	1.48765e-09	23	22	cg01765653	29599160	3.12323e-13	4.10707e-10	0.389593	0.523947	0.546817	-0.157224	0.0347411	0.0509837	0.0422583	2
chr17:42431092-42432555*Island	17	chr17:42431092-42432555	Island	FAM171A2	1.91297e-11	3.97464e-09	7	7	cg15909132	42431109	2.42557e-13	3.33916e-10	0.61005	0.410523	0.395394	0.214656	0.0574988	0.118652	0.0499649	2
chr7:1784027-1786934*N_Shore	7	chr7:1784027-1786934	N_Shore	ELFN1	2.15831e-11	4.3765e-09	8	8	cg17890940	1782346	3.01696e-13	3.99715e-10	0.550766	0.792713	0.820727	-0.269962	0.0825423	0.0624533	0.0448832	2
chr19:46800053-46800603*S_Shore	19	chr19:46800053-46800603	S_Shore	HIF3A	2.60247e-11	5.11813e-09	3	3	cg16672562	46801672	1.10753e-12	1.25102e-09	0.905727	0.573289	0.593023	0.312704	0.0583387	0.134807	0.145593	2
chr11:112832524-112834490*N_Shore	11	chr11:112832524-112834490	N_Shore	NCAM1	2.65939e-11	5.15527e-09	13	13	cg20783319	112831681	1.13574e-11	9.35185e-09	0.338687	0.214657	0.186721	0.151965	0.0528189	0.0628786	0.0387907	2
chr1:228296787-228297276*S_Shore	1	chr1:228296787-228297276	S_Shore	MRPL55	7.76248e-11	1.32799e-08	4	4	cg08158976	228297975	3.26607e-12	3.16218e-09	0.35945	0.231127	0.251138	0.108312	0.0482346	0.0491707	0.0443281	2
chr7:27182613-27185562*Island	7	chr7:27182613-27185562	Island	HOXA5	2.02318e-10	3.06278e-08	50	46	cg13694927	27184712	7.37811e-09	2.17432e-06	0.533417	0.399259	0.393357	0.14006	0.0639142	0.0616451	0.0580113	2
chr20:2672904-2674698*S_Shore	20	chr20:2672904-2674698	S_Shore	EBF4	5.79157e-10	7.55394e-08	4	3	cg13518079	2675072	1.78722e-11	1.33444e-08	0.613926	0.303266	0.296799	0.317128	0.0749953	0.0976064	0.09872	2
chr3:48698335-48701667*Island	3	chr3:48698335-48701667	Island	CELSR3	6.61708e-10	8.34647e-08	20	20	cg03223076	48698558	5.21041e-10	2.36632e-07	0.709084	0.547095	0.497746	0.211339	0.0677583	0.0833183	0.0688774	2
chr17:18528376-18528714*Island	17	chr17:18528376-18528714	Island	CCDC144B	6.41745e-09	5.39516e-07	3	3	cg26162794	18528568	1.58398e-10	8.43249e-08	0.890865	0.750428	0.736632	0.154233	0.0539956	0.0858823	0.0805735	2
chr2:217497811-217498847*S_Shelf	2	chr2:217497811-217498847	S_Shelf	IGFBP2	7.97105e-09	6.49163e-07	3	3	cg22979368	217501581	4.52173e-10	2.08036e-07	0.466738	0.344598	0.350747	0.115991	0.0527312	0.0482485	0.0435982	2
chr17:46685244-46685449*N_Shelf	17	chr17:46685244-46685449	N_Shelf	LOC404266	1.52057e-08	1.12438e-06	10	10	cg03803541	46681401	1.57612e-06	0.000192868	0.367671	0.526544	0.524975	-0.157303	0.0694208	0.0839347	0.0835811	2
chr17:46685244-46685449*N_Shelf	17	chr17:46685244-46685449	N_Shelf	HOXB6	1.52057e-08	1.12438e-06	10	10	cg03803541	46681401	1.57612e-06	0.000192868	0.367671	0.526544	0.524975	-0.157303	0.0694208	0.0839347	0.0835811	2
chr1:27687024-27687743*Island	1	chr1:27687024-27687743	Island	MAP3K6	1.82165e-08	1.30221e-06	5	5	cg20996351	27687232	6.06438e-10	2.65824e-07	0.270052	0.108625	0.0868508	0.183202	0.0665944	0.0396963	0.0341853	2
chr8:6424215-6424888*N_Shelf	8	chr8:6424215-6424888	N_Shelf	MCPH1	1.85352e-08	1.31751e-06	7	7	cg24670715	6420506	1.32611e-09	5.10209e-07	0.522491	0.703904	0.705584	-0.183093	0.0837741	0.0562545	0.0463924	2
chr8:6424215-6424888*N_Shelf	8	chr8:6424215-6424888	N_Shelf	ANGPT2	1.85352e-08	1.31751e-06	7	7	cg24670715	6420506	1.32611e-09	5.10209e-07	0.522491	0.703904	0.705584	-0.183093	0.0837741	0.0562545	0.0463924	2
chr4:145566242-145567413*Island	4	chr4:145566242-145567413	Island	HHIP	2.14944e-08	1.48707e-06	7	7	cg13749822	145566663	5.99515e-10	2.63444e-07	0.378772	0.249537	0.230513	0.148259	0.0482867	0.0601868	0.0476848	2
chr10:70320130-70320822*S_Shore	10	chr10:70320130-70320822	S_Shore	TET1	2.76638e-08	1.8264e-06	11	10	cg15254238	70321874	8.48371e-10	3.50921e-07	0.172539	0.278924	0.270058	-0.0975189	0.0470207	0.0481255	0.0459892	2
chr21:36258952-36259472*Island	21	chr21:36258952-36259472	Island	RUNX1	4.81245e-08	2.89818e-06	4	4	cg06758350	36259460	1.98443e-08	4.94594e-06	0.708616	0.332878	0.392439	0.316177	0.0782516	0.100405	0.12618	2
chr11:62368454-62370491*Island	11	chr11:62368454-62370491	Island	MTA2	6.53029e-08	3.7815e-06	12	10	cg22862634	62369728	4.93797e-09	1.57062e-06	0.257534	0.160467	0.148275	0.109258	0.0491738	0.063661	0.0445926	2
chr11:62368454-62370491*Island	11	chr11:62368454-62370491	Island	EML3	6.53029e-08	3.7815e-06	12	10	cg22862634	62369728	4.93797e-09	1.57062e-06	0.257534	0.160467	0.148275	0.109258	0.0491738	0.063661	0.0445926	2
chr20:741633-742058*Island	20	chr20:741633-742058	Island	C20orf54	1.39147e-07	7.17988e-06	3	3	cg19037007	741798	3.60098e-07	5.71136e-05	0.551818	0.415801	0.368377	0.183441	0.0664012	0.0746287	0.05998	2
chr17:45924598-45925807*Island	17	chr17:45924598-45925807	Island	SP6	2.80669e-07	1.28359e-05	4	4	cg10531725	45924888	2.35064e-08	5.7529e-06	0.451108	0.309075	0.267868	0.18324	0.087677	0.0822722	0.0535585	2
chr6:170597246-170597499*N_Shore	6	chr6:170597246-170597499	N_Shore	DLL1	5.02526e-07	2.1225e-05	4	4	cg27246129	170595947	1.25853e-08	3.32984e-06	0.78574	0.513819	0.514176	0.271564	0.091609	0.121653	0.086761	2
chr1:46088194-46089142*Island	1	chr1:46088194-46089142	Island	CCDC17	7.37008e-07	2.93688e-05	5	4	cg03335125	46088541	3.30451e-08	7.66173e-06	0.72279	0.916206	0.900698	-0.177908	0.0948125	0.0641595	0.0621039	2
chr17:7253298-7253764*Island	17	chr17:7253298-7253764	Island	ACAP1	9.76624e-07	3.78224e-05	3	3	cg07925670	7253489	6.84632e-08	1.39629e-05	0.603047	0.384827	0.392531	0.210516	0.103036	0.0710991	0.0695718	2
chr8:144357997-144359075*Island	8	chr8:144357997-144359075	Island	GLI4	2.19453e-06	7.53458e-05	4	4	cg22857963	144358043	1.35869e-07	2.48874e-05	0.463255	0.198704	0.218068	0.245187	0.101881	0.086175	0.0729867	2
chr16:743924-745943*Island	16	chr16:743924-745943	Island	FBXL16	3.30002e-06	0.000105249	10	10	cg27436995	743998	0.000702337	0.0251289	0.576787	0.489797	0.264765	0.312022	0.167975	0.186946	0.168445	2
chr14:45431628-45432115*S_Shore	14	chr14:45431628-45432115	S_Shore	FAM179B	7.54719e-06	0.000208775	3	3	cg21096966	45432458	3.78443e-07	5.98079e-05	0.580878	0.398794	0.419434	0.161444	0.0849617	0.0734057	0.0441024	2
chr14:45431628-45432115*S_Shore	14	chr14:45431628-45432115	S_Shore	KLHL28	7.54719e-06	0.000208775	3	3	cg21096966	45432458	3.78443e-07	5.98079e-05	0.580878	0.398794	0.419434	0.161444	0.0849617	0.0734057	0.0441024	2
chr1:2121017-2121818*Island	1	chr1:2121017-2121818	Island	LOC100128003	9.4234e-06	0.000251021	5	4	cg05337761	2121349	5.11901e-07	7.57368e-05	0.532354	0.351178	0.318336	0.214018	0.0993648	0.143473	0.0946622	2
chr1:2121017-2121818*Island	1	chr1:2121017-2121818	Island	C1orf86	9.4234e-06	0.000251021	5	4	cg05337761	2121349	5.11901e-07	7.57368e-05	0.532354	0.351178	0.318336	0.214018	0.0993648	0.143473	0.0946622	2
chr4:778661-780592*Island	4	chr4:778661-780592	Island	CPLX1	9.74796e-06	0.00025823	10	10	cg05448404	779173	7.36317e-07	0.000102324	0.362964	0.21791	0.174045	0.188919	0.106401	0.0764618	0.0390026	2
chr16:57562451-57563325*Island	16	chr16:57562451-57563325	Island	CCDC102A	9.88546e-06	0.000259331	4	4	cg05004142	57562740	0.00235002	0.0605585	0.458178	0.696758	0.681657	-0.223478	0.115763	0.142382	0.144724	2
chr12:123380333-123380894*Island	12	chr12:123380333-123380894	Island	VPS37B	1.1332e-05	0.000289731	7	7	cg06634460	123380891	6.13369e-07	8.82538e-05	0.436784	0.25183	0.258391	0.178393	0.0818075	0.0714278	0.0621197	2
chr17:16592835-16594147*Island	17	chr17:16592835-16594147	Island	CCDC144A	1.53405e-05	0.000375961	10	10	cg03049249	16593601	1.3391e-06	0.000168306	0.673193	0.530814	0.492873	0.180319	0.106219	0.146488	0.118134	2
chr16:450834-451140*Island	16	chr16:450834-451140	Island	DECR2	3.04929e-05	0.000667975	4	4	cg02963119	450970	1.11151e-06	0.000143069	0.55645	0.362403	0.388626	0.167825	0.0835133	0.130941	0.114816	2
chr1:201617041-201619788*Island	1	chr1:201617041-201619788	Island	NAV1	7.60848e-05	0.00141022	15	13	cg05695937	201618003	3.4031e-06	0.000361461	0.321338	0.212698	0.158527	0.162811	0.0881967	0.0745233	0.0643806	2
chr6:32063533-32065044*Island	6	chr6:32063533-32065044	Island	TNXB	0.000104028	0.00180139	51	43	cg14188106	32063895	5.13036e-05	0.00327813	0.697592	0.443804	0.394076	0.303516	0.13235	0.181899	0.144501	2
chr18:77905297-77905566*Island	18	chr18:77905297-77905566	Island	LOC100130522	0.00011783	0.00200704	5	3	cg05251669	77905391	4.19029e-06	0.00042854	0.107254	0.254669	0.27035	-0.163096	0.0588805	0.0960129	0.061617	2
chr18:77905297-77905566*S_Shore	18	chr18:77905297-77905566	S_Shore	LOC100130522	0.000185082	0.00285472	5	5	cg13287964	77905751	1.56255e-05	0.00126476	0.190303	0.362747	0.396673	-0.20637	0.0892664	0.113018	0.0757729	2
chr11:2290104-2292932*Island	11	chr11:2290104-2292932	Island	ASCL2	0.000185756	0.00285472	31	29	cg19284039	2292895	1.68924e-05	0.00134299	0.498742	0.71271	0.669091	-0.170349	0.101053	0.106103	0.1082	2
chr1:228289669-228291184*S_Shore	1	chr1:228289669-228291184	S_Shore	C1orf35	0.000186936	0.0028688	5	4	cg15720832	228291682	1.32708e-05	0.00110422	0.806531	0.645291	0.621519	0.185012	0.0838496	0.123109	0.0703196	2
chr7:27169572-27170638*Island	7	chr7:27169572-27170638	Island	HOXA4	0.000240789	0.00350254	10	9	cg11410718	27170412	2.91852e-05	0.00210248	0.558469	0.411918	0.390133	0.168336	0.0776782	0.0871646	0.0867567	2
chr1:869332-871872*Island	1	chr1:869332-871872	Island	SAMD11	0.000420014	0.00542723	10	9	cg10146935	871308	5.89025e-05	0.00365725	0.524923	0.272804	0.242165	0.282759	0.146065	0.156264	0.105828	2
chr4:81118137-81118603*N_Shore	4	chr4:81118137-81118603	N_Shore	PRDM8	0.000843036	0.0092909	4	4	cg05452645	81117647	5.74741e-05	0.00359224	0.652616	0.450743	0.486107	0.166509	0.112098	0.076399	0.0818763	2
chr4:81119095-81119391*Island	4	chr4:81119095-81119391	Island	PRDM8	0.00115517	0.0118648	4	4	cg27242132	81119178	9.84996e-05	0.00548049	0.424646	0.181628	0.192211	0.232435	0.155566	0.0496864	0.0866695	2
chr6:44243085-44244481*Island	6	chr6:44243085-44244481	Island	TMEM151B	0.00130375	0.0130494	5	5	cg24652615	44243304	9.37599e-05	0.00530046	0.907405	0.798398	0.729249	0.178157	0.0619394	0.108105	0.14394	2
chr6:168435835-168436086*Island	6	chr6:168435835-168436086	Island	KIF25	0.00136689	0.0135452	3	3	cg08476511	168435923	0.000172901	0.00850561	0.610676	0.496491	0.448286	0.16239	0.15268	0.136693	0.13349	2
chr4:81118137-81118603*Island	4	chr4:81118137-81118603	Island	PRDM8	0.00174999	0.0162179	4	4	cg26299084	81118588	8.68372e-05	0.00499076	0.426354	0.198962	0.209919	0.216434	0.142217	0.0498304	0.0734925	2
chr6:32632158-32633027*Island	6	chr6:32632158-32633027	Island	HLA-DQB1	0.00267023	0.0223008	23	20	cg21493951	32632338	0.00520266	0.1051	0.590826	0.380289	0.381987	0.20884	0.300383	0.226451	0.258867	2
chr7:1896090-1896451*N_Shore	7	chr7:1896090-1896451	N_Shore	MAD1L1	2.0513e-22	3.14411e-18	8	8	cg09367467	1894209	6.38629e-23	5.09276e-18	0.211547	0.371275	0.384395	-0.172848	0.0288347	0.0354942	0.0308103	1
chr6:31649081-31649373*N_Shelf	6	chr6:31649081-31649373	N_Shelf	LY6G5C	3.56857e-22	3.14411e-18	14	12	cg11452501	31646976	1.24767e-24	2.19852e-19	0.288458	0.513039	0.524229	-0.23577	0.0355769	0.058352	0.0308275	1
chr16:31075084-31075756*Island	16	chr16:31075084-31075756	Island	ZNF668	2.45856e-20	1.88359e-16	3	3	cg11824827	31075547	8.67044e-23	5.09276e-18	0.34837	0.591902	0.585778	-0.237408	0.0305064	0.0430924	0.0440382	1
chr16:85932121-85932942*S_Shelf	16	chr16:85932121-85932942	S_Shelf	IRF8	5.74881e-20	3.61787e-16	5	5	cg16705546	85936666	1.02921e-21	4.53396e-17	0.0989622	0.311841	0.305131	-0.206169	0.0204901	0.0515983	0.045381	1
chr10:81002109-81003687*Island	10	chr10:81002109-81003687	Island	ZMIZ1	5.69206e-19	3.03941e-15	6	5	cg20543544	81003657	3.75949e-15	1.0351e-11	0.127554	0.323622	0.323225	-0.195671	0.0217063	0.073257	0.0567024	1
chr13:113622737-113623660*N_Shore	13	chr13:113622737-113623660	N_Shore	MCF2L	3.32901e-17	5.53403e-14	7	7	cg20895669	113622539	1.70091e-18	2.87494e-14	0.396126	0.574369	0.580936	-0.18481	0.0383001	0.0503456	0.0313331	1
chr5:176829339-176829756*Island	5	chr5:176829339-176829756	Island	F12	3.88448e-17	6.27971e-14	3	3	cg12477903	176829557	3.90287e-16	1.76341e-12	0.445661	0.275307	0.245062	0.200599	0.0343916	0.0589464	0.0463526	1
chr17:934417-935088*Island	17	chr17:934417-935088	Island	ABR	7.78625e-17	1.07007e-13	3	3	cg20699780	935017	1.79469e-18	2.87494e-14	0.816049	0.595201	0.583648	0.232401	0.0564832	0.0789959	0.0631169	1
chr21:43654846-43655465*Island	21	chr21:43654846-43655465	Island	ABCG1	1.49584e-16	1.88274e-13	4	4	cg07397296	43655316	4.0191e-18	5.05864e-14	0.424048	0.24865	0.255827	0.168221	0.0344181	0.0423813	0.0366066	1
chr14:23790212-23790659*N_Shore	14	chr14:23790212-23790659	N_Shore	PABPN1	4.7425e-16	4.74819e-13	5	5	cg04861271	23789531	6.50357e-18	7.64e-14	0.581493	0.821097	0.816217	-0.234724	0.0577488	0.0337485	0.0416558	1
chr10:104180478-104182042*S_Shore	10	chr10:104180478-104182042	S_Shore	FBXL15	4.92416e-16	4.8205e-13	4	4	cg10337322	104182490	7.57719e-18	8.34491e-14	0.368305	0.169115	0.171388	0.196917	0.0519129	0.0389788	0.0446041	1
chr16:729438-735815*Island	16	chr16:729438-735815	Island	JMJD8	1.11929e-15	9.13111e-13	27	27	cg09465703	733842	2.08808e-17	2.04413e-13	0.460732	0.199132	0.211546	0.249186	0.0525684	0.0560293	0.0371254	1
chr11:881368-881666*S_Shore	11	chr11:881368-881666	S_Shore	CHID1	1.28104e-15	1.03075e-12	4	3	cg14909179	882687	3.42376e-17	2.74229e-13	0.364916	0.667492	0.654744	-0.289828	0.0536903	0.0789093	0.073039	1
chr12:122240899-122243390*S_Shore	12	chr12:122240899-122243390	S_Shore	SETD1B	1.58888e-15	1.25551e-12	4	4	cg00853733	122244223	2.63605e-16	1.25541e-12	0.326001	0.115254	0.104802	0.221199	0.0632415	0.0363324	0.0258384	1
chr6:17987415-17988405*N_Shore	6	chr6:17987415-17988405	N_Shore	KIF13A	2.17441e-15	1.58329e-12	3	3	cg15414930	17985564	1.43149e-16	7.64375e-13	0.736776	0.49224	0.54686	0.189916	0.0391481	0.0644228	0.0582368	1
chr3:9987895-9989619*Island	3	chr3:9987895-9989619	Island	PRRT3	4.8835e-15	3.49808e-12	4	4	cg02725398	9988144	3.28265e-17	2.74229e-13	0.662122	0.274505	0.246097	0.416025	0.108777	0.073853	0.056492	1
chr3:49755763-49757317*Island	3	chr3:49755763-49757317	Island	RNF123	9.68404e-15	6.02981e-12	10	10	cg22993195	49756301	1.16049e-16	7.30326e-13	0.859696	0.608955	0.524649	0.335047	0.0588316	0.10209	0.0799347	1
chr3:49755763-49757317*Island	3	chr3:49755763-49757317	Island	AMIGO3	9.68404e-15	6.02981e-12	10	10	cg22993195	49756301	1.16049e-16	7.30326e-13	0.859696	0.608955	0.524649	0.335047	0.0588316	0.10209	0.0799347	1
chr16:1820311-1823954*Island	16	chr16:1820311-1823954	Island	NME3	1.48109e-14	7.79077e-12	16	16	cg08640252	1820949	1.30329e-14	2.90701e-11	0.403298	0.126359	0.154037	0.249261	0.0700667	0.0552358	0.0686169	1
chr3:37493418-37494538*S_Shore	3	chr3:37493418-37494538	S_Shore	ITGA9	2.00765e-14	1.04357e-11	3	3	cg04479212	37495166	4.77897e-13	6.10223e-10	0.485986	0.264498	0.277781	0.208205	0.0729146	0.0604788	0.0500509	1
chr13:93879245-93880877*N_Shore	13	chr13:93879245-93880877	N_Shore	GPC6	2.42005e-14	1.19117e-11	6	6	cg06047020	93877835	1.06312e-15	3.90277e-12	0.428296	0.66869	0.681962	-0.253666	0.067932	0.0660985	0.0453717	1
chr8:145733793-145735370*N_Shore	8	chr8:145733793-145735370	N_Shore	MFSD3	3.12879e-14	1.4395e-11	3	3	cg01115058	145733190	2.15481e-16	1.0671e-12	0.630259	0.765285	0.783558	-0.153299	0.0377104	0.0523169	0.0328253	1
chr2:54086776-54087266*S_Shore	2	chr2:54086776-54087266	S_Shore	LOC100302652	3.24103e-14	1.47572e-11	4	4	cg19664945	54087343	1.1517e-14	2.63561e-11	0.455343	0.705232	0.693337	-0.237993	0.0666281	0.102854	0.0551737	1
chr2:54086776-54087266*S_Shore	2	chr2:54086776-54087266	S_Shore	GPR75	3.24103e-14	1.47572e-11	4	4	cg19664945	54087343	1.1517e-14	2.63561e-11	0.455343	0.705232	0.693337	-0.237993	0.0666281	0.102854	0.0551737	1
chr10:102820488-102822874*Island	10	chr10:102820488-102822874	Island	KAZALD1	9.28134e-14	3.89399e-11	16	14	cg15302379	102821848	1.59194e-15	5.00925e-12	0.494923	0.626983	0.662211	-0.167288	0.0385219	0.0823974	0.0471085	1
chr20:3641130-3642114*S_Shore	20	chr20:3641130-3642114	S_Shore	GFRA4	1.65538e-13	6.52565e-11	3	3	cg19545472	3644097	6.60492e-15	1.66266e-11	0.752189	0.62319	0.599588	0.152601	0.0299878	0.0639213	0.039317	1
chr15:99500472-99500721*N_Shore	15	chr15:99500472-99500721	N_Shore	IGF1R	1.71483e-13	6.71494e-11	3	3	cg05103581	99499605	1.54412e-12	1.69953e-09	0.188839	0.31854	0.322963	-0.134125	0.0357092	0.0515239	0.043869	1
chr14:24641053-24642220*Island	14	chr14:24641053-24642220	Island	REC8	2.01237e-13	7.52872e-11	11	11	cg06351481	24642219	4.46557e-15	1.19225e-11	0.743376	0.617497	0.596339	0.147037	0.0319769	0.0560941	0.0451762	1
chr9:132082871-132083582*Island	9	chr9:132082871-132083582	Island	C9orf106	3.6621e-13	1.23858e-10	3	3	cg25073708	132083538	8.8269e-15	2.13068e-11	0.516457	0.344365	0.340726	0.175731	0.0482626	0.0617504	0.0318655	1
chr11:112832524-112834490*Island	11	chr11:112832524-112834490	Island	NCAM1	6.0565e-13	1.99481e-10	5	5	cg04642306	112834466	1.33911e-14	2.94958e-11	0.611399	0.405319	0.39275	0.218649	0.0530443	0.0561186	0.0415728	1
chr8:145749855-145750410*Island	8	chr8:145749855-145750410	Island	LRRC24	1.10214e-12	3.48671e-10	3	3	cg19682134	145750363	4.24215e-11	2.73815e-08	0.739787	0.554468	0.500544	0.239242	0.0793813	0.0790548	0.0594297	1
chr8:145749855-145750410*Island	8	chr8:145749855-145750410	Island	LRRC14	1.10214e-12	3.48671e-10	3	3	cg19682134	145750363	4.24215e-11	2.73815e-08	0.739787	0.554468	0.500544	0.239242	0.0793813	0.0790548	0.0594297	1
chr9:139888934-139890343*Island	9	chr9:139888934-139890343	Island	CLIC3	2.76983e-12	7.62617e-10	4	4	cg13423383	139889616	4.92893e-14	8.68532e-11	0.788488	0.587582	0.548126	0.240363	0.069192	0.0787781	0.0457449	1
chr9:33750519-33751160*Island	9	chr9:33750519-33751160	Island	PRSS3	4.70724e-12	1.24732e-09	3	3	cg02227496	33750617	2.17715e-10	1.11848e-07	0.315955	0.223623	0.185124	0.130831	0.0485084	0.0454656	0.0453335	1
chr9:98268475-98271454*N_Shore	9	chr9:98268475-98271454	N_Shore	PTCH1	6.63083e-12	1.64335e-09	3	3	cg13456470	98266766	5.13341e-13	6.46117e-10	0.634009	0.40515	0.44448	0.189529	0.0377769	0.0608163	0.0699033	1
chr8:145703038-145703902*N_Shore	8	chr8:145703038-145703902	N_Shore	FOXH1	1.39524e-11	3.21381e-09	6	6	cg13065228	145701192	9.91817e-13	1.14228e-09	0.893318	0.720075	0.700189	0.193129	0.042951	0.116749	0.0672165	1
chr8:22722313-22723552*Island	8	chr8:22722313-22723552	Island	PEBP4	1.66599e-11	3.58007e-09	5	5	cg20378690	22723551	3.44778e-13	4.46718e-10	0.586141	0.409315	0.431536	0.154605	0.0611466	0.0658898	0.0503639	1
chr19:2041823-2042593*Island	19	chr19:2041823-2042593	Island	MKNK2	1.6883e-11	3.59567e-09	7	7	cg00434573	2041960	1.18078e-11	9.67749e-09	0.492455	0.329375	0.288098	0.204357	0.0524134	0.0587003	0.0621866	1
chr20:3063005-3064146*S_Shore	20	chr20:3063005-3064146	S_Shore	AVP	1.70386e-11	3.59567e-09	8	8	cg16536918	3065403	4.04821e-11	2.65182e-08	0.548692	0.4317	0.424571	0.124121	0.0541685	0.05421	0.0389207	1
chr5:149109570-149111750*N_Shore	5	chr5:149109570-149111750	N_Shore	PPARGC1B	1.87756e-11	3.94806e-09	3	3	cg16786458	149108820	2.89009e-13	3.85807e-10	0.565691	0.387856	0.412635	0.153056	0.0443831	0.0780831	0.05825	1
chr16:1587683-1587899*Island	16	chr16:1587683-1587899	Island	TMEM204	2.18766e-11	4.42075e-09	3	3	cg10471113	1587842	9.88015e-13	1.14228e-09	0.333214	0.633309	0.606034	-0.27282	0.0985674	0.121362	0.0824109	1
chr16:1587683-1587899*Island	16	chr16:1587683-1587899	Island	IFT140	2.18766e-11	4.42075e-09	3	3	cg10471113	1587842	9.88015e-13	1.14228e-09	0.333214	0.633309	0.606034	-0.27282	0.0985674	0.121362	0.0824109	1
chr13:98828563-98829385*N_Shelf	13	chr13:98828563-98829385	N_Shelf	FARP1	2.54126e-11	5.01453e-09	4	4	cg01997461	98825992	7.80231e-13	9.17394e-10	0.472938	0.654598	0.670828	-0.19789	0.0648534	0.0567984	0.0381077	1
chr19:47615253-47617101*S_Shore	19	chr19:47615253-47617101	S_Shore	ZC3H4	3.15336e-11	6.05291e-09	4	3	cg24181914	47617301	1.58491e-11	1.22491e-08	0.533429	0.373582	0.375179	0.158249	0.0482766	0.0786252	0.0522431	1
chr15:78857725-78858269*N_Shore	15	chr15:78857725-78858269	N_Shore	CHRNA5	5.60658e-11	1.0185e-08	5	5	cg19696491	78857124	6.28086e-12	5.64672e-09	0.266728	0.419455	0.422617	-0.155889	0.0427038	0.0643458	0.0543978	1
chr7:48128727-48129961*Island	7	chr7:48128727-48129961	Island	UPP1	7.58593e-11	1.31567e-08	6	6	cg10213875	48129814	2.65624e-12	2.6444e-09	0.607327	0.817923	0.816354	-0.209028	0.0691445	0.127811	0.055226	1
chr5:177945808-177946121*N_Shelf	5	chr5:177945808-177946121	N_Shelf	COL23A1	9.42589e-11	1.59247e-08	3	3	cg09001527	177942856	1.79765e-11	1.33551e-08	0.48423	0.640392	0.655749	-0.171519	0.0482049	0.0603627	0.0505347	1
chr8:23260442-23261867*S_Shore	8	chr8:23260442-23261867	S_Shore	LOXL2	1.40182e-10	2.24356e-08	5	5	cg04259752	23262159	3.66702e-11	2.43838e-08	0.539581	0.687036	0.693761	-0.15418	0.0463245	0.0523746	0.0297519	1
chr20:62693942-62695282*Island	20	chr20:62693942-62695282	Island	TCEA2	2.72029e-10	3.95826e-08	11	11	cg12176783	62694000	3.7664e-11	2.4857e-08	0.845584	0.644354	0.657206	0.188377	0.0518511	0.0744229	0.0564795	1
chr5:178421225-178422337*Island	5	chr5:178421225-178422337	Island	GRM6	4.44699e-10	6.08391e-08	7	7	cg01281157	178422260	2.86552e-11	1.9958e-08	0.3664	0.196335	0.183855	0.182545	0.0740359	0.0356271	0.0278805	1
chr11:1083134-1083358*Island	11	chr11:1083134-1083358	Island	MUC2	4.84121e-10	6.60274e-08	4	4	cg15356553	1083178	1.38129e-10	7.4662e-08	0.502574	0.668577	0.666998	-0.164424	0.060695	0.0480323	0.0336435	1
chr16:2286600-2288073*Island	16	chr16:2286600-2288073	Island	DNASE1L2	5.09345e-10	6.89341e-08	6	6	cg17300750	2288072	8.92667e-12	7.56239e-09	0.493372	0.359399	0.354806	0.138566	0.0491083	0.0448486	0.0404693	1
chr4:99849305-99850552*S_Shore	4	chr4:99849305-99850552	S_Shore	EIF4E	5.30162e-10	7.03467e-08	13	13	cg15633390	99851211	7.30846e-11	4.35078e-08	0.39238	0.263591	0.236061	0.156318	0.0611875	0.122593	0.0588689	1
chr17:46673532-46674181*N_Shore	17	chr17:46673532-46674181	N_Shore	HOXB5	9.27895e-10	1.10626e-07	7	7	cg01405107	46671635	8.73733e-11	5.09806e-08	0.578643	0.366624	0.392719	0.185924	0.0482784	0.0771247	0.0598844	1
chr17:46673532-46674181*N_Shore	17	chr17:46673532-46674181	N_Shore	LOC404266	9.27895e-10	1.10626e-07	7	7	cg01405107	46671635	8.73733e-11	5.09806e-08	0.578643	0.366624	0.392719	0.185924	0.0482784	0.0771247	0.0598844	1
chr6:17987415-17988405*S_Shore	6	chr6:17987415-17988405	S_Shore	KIF13A	1.09056e-09	1.23897e-07	8	8	cg08248579	17988937	6.60981e-11	4.05826e-08	0.728335	0.458325	0.487458	0.240878	0.0622507	0.0896503	0.0724211	1
chr7:2645524-2645765*S_Shore	7	chr7:2645524-2645765	S_Shore	IQCE	1.72632e-09	1.8635e-07	7	7	cg04955333	2647414	2.00725e-10	1.04029e-07	0.540007	0.632931	0.685649	-0.145641	0.0496432	0.0589919	0.0295241	1
chr1:68298371-68299315*S_Shore	1	chr1:68298371-68299315	S_Shore	GNG12	2.48271e-09	2.53759e-07	5	5	cg13184736	68299409	1.7623e-10	9.29751e-08	0.163883	0.403368	0.364424	-0.200541	0.0510452	0.0881423	0.0639515	1
chr19:811904-813824*Island	19	chr19:811904-813824	Island	LPPR3	2.70554e-09	2.68287e-07	3	3	cg24840300	812517	2.03848e-10	1.0503e-07	0.953241	0.776502	0.687774	0.265467	0.0231248	0.171016	0.108635	1
chr19:4558363-4558579*Island	19	chr19:4558363-4558579	Island	SEMA6B	2.77106e-09	2.71028e-07	6	6	cg11545720	4558377	1.51585e-10	8.11882e-08	0.647502	0.470916	0.471412	0.176091	0.0548082	0.0749321	0.0499277	1
chr10:102896342-102896665*Island	10	chr10:102896342-102896665	Island	TLX1	3.62459e-09	3.33018e-07	4	4	cg06382559	102896640	7.62483e-11	4.50866e-08	0.35803	0.183512	0.180944	0.177086	0.0521429	0.0489975	0.0450043	1
chr9:139257842-139259075*Island	9	chr9:139257842-139259075	Island	CARD9	6.18308e-09	5.20558e-07	5	5	cg14035368	139258938	1.30245e-10	7.12754e-08	0.880793	0.730007	0.70044	0.180353	0.0499097	0.0749883	0.0586189	1
chr9:139257842-139259075*Island	9	chr9:139257842-139259075	Island	DNLZ	6.18308e-09	5.20558e-07	5	5	cg14035368	139258938	1.30245e-10	7.12754e-08	0.880793	0.730007	0.70044	0.180353	0.0499097	0.0749883	0.0586189	1
chr11:849087-850982*Island	11	chr11:849087-850982	Island	TSPAN4	6.89442e-09	5.77411e-07	6	5	cg01422274	849088	2.7543e-09	9.48614e-07	0.431283	0.272134	0.283384	0.147899	0.062872	0.0702138	0.0379566	1
chr18:25755414-25758175*N_Shore	18	chr18:25755414-25758175	N_Shore	CDH2	1.26391e-08	9.44909e-07	3	3	cg22332722	25754857	1.11332e-09	4.37901e-07	0.640617	0.485352	0.462542	0.178075	0.0518592	0.0749233	0.0864666	1
chr16:31498650-31500564*Island	16	chr16:31498650-31500564	Island	SLC5A2	1.66288e-08	1.20981e-06	4	4	cg18892212	31499991	3.31521e-10	1.59176e-07	0.638956	0.480059	0.443743	0.195213	0.0627841	0.047155	0.0485588	1
chr4:656993-658162*Island	4	chr4:656993-658162	Island	PDE6B	1.97777e-08	1.37913e-06	7	7	cg23980776	657074	5.88222e-10	2.59128e-07	0.789327	0.643557	0.601674	0.187653	0.0546306	0.0907344	0.0610963	1
chr22:51016253-51017020*S_Shore	22	chr22:51016253-51017020	S_Shore	CPT1B	2.40002e-08	1.63159e-06	7	7	cg00983520	51017067	6.92957e-10	2.98549e-07	0.434065	0.263844	0.255142	0.178923	0.0671238	0.0471699	0.0546241	1
chr22:51016253-51017020*S_Shore	22	chr22:51016253-51017020	S_Shore	CHKB-CPT1B	2.40002e-08	1.63159e-06	7	7	cg00983520	51017067	6.92957e-10	2.98549e-07	0.434065	0.263844	0.255142	0.178923	0.0671238	0.0471699	0.0546241	1
chr10:134359533-134359780*N_Shore	10	chr10:134359533-134359780	N_Shore	INPP5A	3.23926e-08	2.09005e-06	8	8	cg09421083	134358535	9.62137e-07	0.000127282	0.65401	0.512129	0.503248	0.150762	0.0639459	0.0730623	0.0584289	1
chr7:45002111-45002845*Island	7	chr7:45002111-45002845	Island	MYO1G	3.80764e-08	2.35173e-06	3	3	cg22132788	45002486	2.82739e-09	9.71183e-07	0.979993	0.894333	0.864262	0.115731	0.0192643	0.0595041	0.056251	1
chr16:85658742-85658998*S_Shore	16	chr16:85658742-85658998	S_Shore	KIAA0182	6.51922e-08	3.7815e-06	4	4	cg00715696	85660534	1.88847e-09	6.93753e-07	0.263578	0.455109	0.443803	-0.180225	0.0450682	0.0944694	0.0792185	1
chr16:67686860-67687674*Island	16	chr16:67686860-67687674	Island	RLTPR	8.1107e-08	4.61179e-06	4	4	cg00510320	67686943	3.12341e-08	7.29946e-06	0.836927	0.653253	0.670846	0.166081	0.0198118	0.105681	0.0884297	1
chr7:2645524-2645765*S_Shelf	7	chr7:2645524-2645765	S_Shelf	IQCE	8.37135e-08	4.74011e-06	9	9	cg04109092	2647852	5.03646e-09	1.59619e-06	0.344077	0.436095	0.5001	-0.156023	0.0604508	0.0616607	0.0512761	1
chr14:35873047-35873990*N_Shore	14	chr14:35873047-35873990	N_Shore	NFKBIA	1.04753e-07	5.75216e-06	4	4	cg16518861	35871715	3.23262e-09	1.08707e-06	0.490069	0.335735	0.335461	0.154607	0.065163	0.075278	0.0581283	1
chr19:45720768-45721077*Island	19	chr19:45720768-45721077	Island	EXOC3L2	1.27667e-07	6.69334e-06	4	4	cg20166049	45721076	1.147e-08	3.10152e-06	0.626211	0.491745	0.528727	0.0974834	0.055235	0.0784965	0.0529194	1
chr17:20798957-20800112*Island	17	chr17:20798957-20800112	Island	CCDC144NL	1.38862e-07	7.17143e-06	11	11	cg08458692	20799408	5.86875e-08	1.23553e-05	0.753981	0.662602	0.64314	0.110841	0.0504387	0.0675401	0.0690659	1
chr10:16561604-16563822*S_Shore	10	chr10:16561604-16563822	S_Shore	C1QL3	2.23074e-07	1.06526e-05	5	5	cg01866359	16564102	1.0266e-08	2.8578e-06	0.478309	0.620638	0.630707	-0.152398	0.0555835	0.0833908	0.0572098	1
chr7:150652807-150653080*Island	7	chr7:150652807-150653080	Island	KCNH2	2.49487e-07	1.16735e-05	5	5	cg14711997	150652864	3.66968e-08	8.33586e-06	0.638145	0.493249	0.46439	0.173755	0.0642433	0.0819853	0.0615504	1
chr20:33585039-33585450*Island	20	chr20:33585039-33585450	Island	MYH7B	3.27681e-07	1.44823e-05	3	3	cg11092487	33585188	1.9098e-08	4.78512e-06	0.589482	0.785257	0.744972	-0.15549	0.0805959	0.102907	0.0655011	1
chr18:31020510-31020847*S_Shore	18	chr18:31020510-31020847	S_Shore	C18orf34	3.67988e-07	1.60482e-05	3	3	cg18382305	31021065	5.40168e-08	1.15795e-05	0.447115	0.575293	0.599865	-0.15275	0.0847493	0.0630984	0.0489497	1
chr9:140473002-140473681*Island	9	chr9:140473002-140473681	Island	WDR85	4.37334e-07	1.86548e-05	4	4	cg13411784	140473680	3.70144e-08	8.37272e-06	0.659038	0.534206	0.500447	0.158592	0.0713377	0.0673839	0.0583426	1
chr20:2731063-2731395*Island	20	chr20:2731063-2731395	Island	EBF4	5.03902e-07	2.12678e-05	3	3	cg17069396	2731102	2.78855e-08	6.63122e-06	0.276506	0.12316	0.0898411	0.186665	0.0772603	0.0499523	0.0387703	1
chr1:93913636-93914524*N_Shore	1	chr1:93913636-93914524	N_Shore	FNBP1L	5.32992e-07	2.22715e-05	6	6	cg01196158	93912688	2.33122e-08	5.71331e-06	0.458794	0.243757	0.24184	0.216954	0.0859938	0.0610677	0.0778903	1
chr16:1583809-1584641*Island	16	chr16:1583809-1584641	Island	IFT140	8.81631e-07	3.46538e-05	8	8	cg06565913	1584452	1.83612e-07	3.21296e-05	0.23834	0.352875	0.386978	-0.148638	0.0522897	0.0661444	0.0636406	1
chr16:1583809-1584641*Island	16	chr16:1583809-1584641	Island	TMEM204	8.81631e-07	3.46538e-05	8	8	cg06565913	1584452	1.83612e-07	3.21296e-05	0.23834	0.352875	0.386978	-0.148638	0.0522897	0.0661444	0.0636406	1
chr10:133793426-133793647*Island	10	chr10:133793426-133793647	Island	BNIP3	9.59982e-07	3.73519e-05	4	4	cg15390444	133793442	2.47413e-08	5.99682e-06	0.689353	0.558971	0.595664	0.0936889	0.0486158	0.0808781	0.0494255	1
chr16:281088-281316*N_Shore	16	chr16:281088-281316	N_Shore	LUC7L	1.27523e-06	4.78107e-05	4	4	cg26697334	279990	6.17029e-08	1.28519e-05	0.615037	0.496045	0.462059	0.152978	0.0800341	0.112515	0.0682222	1
chr21:46236726-46238958*Island	21	chr21:46236726-46238958	Island	SUMO3	1.29379e-06	4.83293e-05	8	8	cg21053323	46237385	4.59802e-08	1.00399e-05	0.263536	0.108411	0.101321	0.162215	0.0720286	0.0441601	0.036447	1
chr19:46806998-46807617*Island	19	chr19:46806998-46807617	Island	HIF3A	1.36514e-06	5.04514e-05	4	4	cg20667364	46807466	3.85594e-07	6.06119e-05	0.388	0.70017	0.663012	-0.275012	0.134031	0.0903761	0.108914	1
chr14:105944421-105945700*Island	14	chr14:105944421-105945700	Island	CRIP2	1.47031e-06	5.35173e-05	7	6	cg12488111	105945699	1.1726e-05	0.000997829	0.481413	0.37075	0.351792	0.129621	0.0636311	0.0610865	0.058341	1
chr16:84538884-84539115*Island	16	chr16:84538884-84539115	Island	KIAA1609	1.71043e-06	6.09743e-05	3	3	cg09259081	84538889	1.46841e-07	2.65384e-05	0.504475	0.269712	0.346023	0.158452	0.095717	0.0826924	0.10041	1
chr8:1764328-1765171*Island	8	chr8:1764328-1765171	Island	MIR596	1.72086e-06	6.12968e-05	5	4	cg06742077	1764878	1.75248e-06	0.000210852	0.634247	0.524093	0.479765	0.154482	0.0804133	0.0753073	0.0724224	1
chr19:45594397-45595007*Island	19	chr19:45594397-45595007	Island	GEMIN7	1.98155e-06	6.9225e-05	3	3	cg03270332	45594670	5.21468e-08	1.12059e-05	0.842974	0.682675	0.683304	0.15967	0.0146685	0.0598537	0.0651671	1
chr17:30669000-30669287*S_Shore	17	chr17:30669000-30669287	S_Shore	C17orf75	2.16526e-06	7.4491e-05	4	3	cg17055821	30669476	4.4706e-07	6.80872e-05	0.505063	0.333624	0.332024	0.173039	0.111444	0.0798507	0.0675651	1
chr22:20783466-20786201*Island	22	chr22:20783466-20786201	Island	SCARF2	2.32053e-06	7.89997e-05	8	8	cg03010792	20784277	3.51738e-07	5.604e-05	0.155159	0.119412	0.119479	0.0356798	0.0352451	0.0272386	0.0258449	1
chr16:23521573-23521899*N_Shore	16	chr16:23521573-23521899	N_Shore	GGA2	2.5713e-06	8.5829e-05	3	3	cg07150862	23520705	4.04711e-07	6.2804e-05	0.476791	0.321332	0.288359	0.188432	0.0856318	0.0799927	0.0748695	1
chr6:146055896-146056981*S_Shore	6	chr6:146055896-146056981	S_Shore	EPM2A	3.08782e-06	9.93443e-05	4	4	cg05220968	146057943	1.01938e-06	0.000133551	0.648007	0.478237	0.490546	0.15746	0.0628428	0.0824541	0.0671165	1
chr19:38885233-38885505*S_Shore	19	chr19:38885233-38885505	S_Shore	SPRED3	4.77079e-06	0.000141312	3	3	cg08704562	38886789	1.93198e-07	3.36732e-05	0.394074	0.262873	0.234407	0.159667	0.0715183	0.0976504	0.0722823	1
chr16:85684107-85684491*S_Shore	16	chr16:85684107-85684491	S_Shore	KIAA0182	5.75061e-06	0.000166884	3	3	cg08899895	85684853	4.77368e-07	7.19568e-05	0.553491	0.437488	0.401824	0.151667	0.0536514	0.0781704	0.0886043	1
chr18:7011267-7011488*Island	18	chr18:7011267-7011488	Island	LAMA1	6.72758e-06	0.000189136	3	3	cg03691722	7011268	1.77352e-07	3.12201e-05	0.430268	0.591759	0.59095	-0.160682	0.0666645	0.0871486	0.0702435	1
chr6:30881533-30882296*S_Shore	6	chr6:30881533-30882296	S_Shore	VARS2	8.41496e-06	0.000226972	18	17	cg06879746	30883768	3.43764e-06	0.000364471	0.61707	0.457094	0.52812	0.0889505	0.0718877	0.0571777	0.0526446	1
chr12:7046237-7047257*Island	12	chr12:7046237-7047257	Island	ATN1	9.67725e-06	0.000257123	4	4	cg14996263	7046277	5.01439e-07	7.48806e-05	0.30736	0.158422	0.128758	0.178602	0.126325	0.059959	0.0459418	1
chr1:120165302-120166626*Island	1	chr1:120165302-120166626	Island	ZNF697	1.0823e-05	0.000280707	6	6	cg11530693	120165357	0.000232245	0.0107553	0.741141	0.910962	0.891162	-0.150021	0.131995	0.053559	0.0578828	1
chr12:54447744-54448091*S_Shore	12	chr12:54447744-54448091	S_Shore	HOXC4	1.14993e-05	0.000293072	5	5	cg03146625	54448729	4.3931e-07	6.70807e-05	0.721441	0.612785	0.5516	0.169841	0.091711	0.100291	0.0812527	1
chr22:20779386-20780560*Island	22	chr22:20779386-20780560	Island	SCARF2	1.31189e-05	0.00032846	4	4	cg22091609	20780508	3.99064e-06	0.000412418	0.501331	0.36557	0.35943	0.141901	0.0709023	0.0748973	0.05789	1
chr17:76798154-76798461*S_Shore	17	chr17:76798154-76798461	S_Shore	USP36	3.37169e-05	0.000724106	3	3	cg06146665	76799964	4.19591e-06	0.000428866	0.556515	0.805389	0.81336	-0.256845	0.146955	0.0852761	0.0791287	1
chr19:39055499-39056379*Island	19	chr19:39055499-39056379	Island	RYR1	4.71653e-05	0.000946912	5	5	cg02452966	39056216	2.2873e-06	0.000260367	0.312163	0.131713	0.108257	0.203905	0.114395	0.103915	0.0934924	1
chr1:2121017-2121818*N_Shore	1	chr1:2121017-2121818	N_Shore	LOC100128003	4.85557e-05	0.000971644	4	3	cg20300514	2120985	4.24964e-06	0.00043287	0.393257	0.244362	0.209725	0.183532	0.100142	0.115435	0.0688247	1
chr1:2121017-2121818*N_Shore	1	chr1:2121017-2121818	N_Shore	C1orf86	4.85557e-05	0.000971644	4	3	cg20300514	2120985	4.24964e-06	0.00043287	0.393257	0.244362	0.209725	0.183532	0.100142	0.115435	0.0688247	1
chr8:145163068-145165467*Island	8	chr8:145163068-145165467	Island	KIAA1875	6.0359e-05	0.00116942	7	7	cg01423393	145164665	0.000701346	0.0251087	0.784556	0.574125	0.546891	0.237665	0.168185	0.15065	0.0791377	1
chr22:50528201-50529085*Island	22	chr22:50528201-50529085	Island	MOV10L1	8.0868e-05	0.00147621	12	11	cg05064106	50528213	1.00944e-05	0.000883627	0.871018	0.751632	0.727239	0.143779	0.0596195	0.10339	0.0780352	1
chr17:7254622-7255808*Island	17	chr17:7254622-7255808	Island	ACAP1	0.000263384	0.00375617	8	8	cg03666441	7254671	3.21869e-05	0.00226867	0.363935	0.204061	0.213197	0.150738	0.103235	0.0620478	0.0792328	1
chr17:7254622-7255808*Island	17	chr17:7254622-7255808	Island	KCTD11	0.000263384	0.00375617	8	8	cg03666441	7254671	3.21869e-05	0.00226867	0.363935	0.204061	0.213197	0.150738	0.103235	0.0620478	0.0792328	1
chr3:48693118-48694768*Island	3	chr3:48693118-48694768	Island	CELSR3	0.000274246	0.00387997	8	7	cg15142694	48694534	1.85303e-05	0.00145057	0.74345	0.61352	0.582869	0.160581	0.100106	0.0736586	0.0564093	1
chr7:27169572-27170638*S_Shore	7	chr7:27169572-27170638	S_Shore	HOXA4	0.00036826	0.00490005	15	14	cg17591595	27171051	3.28161e-05	0.00230381	0.757829	0.662216	0.650701	0.107128	0.0430683	0.0590072	0.0553112	1
chr1:1564421-1570006*Island	1	chr1:1564421-1570006	Island	MMP23A	0.000389528	0.00511164	17	16	cg03136646	1567257	0.000140031	0.00723185	0.200708	0.189653	0.182791	0.0179172	0.0203248	0.0229249	0.0157928	1
chr1:1564421-1570006*Island	1	chr1:1564421-1570006	Island	MMP23B	0.000389528	0.00511164	17	16	cg03136646	1567257	0.000140031	0.00723185	0.200708	0.189653	0.182791	0.0179172	0.0203248	0.0229249	0.0157928	1
chr2:85811340-85811855*Island	2	chr2:85811340-85811855	Island	VAMP5	0.000441717	0.00563534	4	4	cg16865965	85811662	0.00197868	0.05359	0.302095	0.143009	0.1411	0.160995	0.118895	0.0763131	0.052311	1
chr19:12984132-12985466*Island	19	chr19:12984132-12985466	Island	MAST1	0.00165264	0.0155546	4	4	cg21073930	12984170	9.78605e-05	0.00545527	0.867243	0.76091	0.687499	0.179744	0.0989373	0.117913	0.0953415	1
chr2:241975533-241976318*Island	2	chr2:241975533-241976318	Island	SNED1	0.00165849	0.0156005	4	4	cg26718213	241976080	0.000634336	0.0232626	0.158222	0.281881	0.261459	-0.103237	0.0565577	0.0930058	0.0810239	1
chr7:44104746-44105116*Island	7	chr7:44104746-44105116	Island	PGAM2	0.00267552	0.0223196	3	3	cg07075347	44104860	0.000143443	0.00737133	0.619972	0.473163	0.397993	0.221979	0.102585	0.140623	0.0912531	1
chr4:2819499-2820429*Island	4	chr4:2819499-2820429	Island	SH3BP2	0.00273354	0.0226918	4	4	cg23613051	2820428	0.000155362	0.00782602	0.432369	0.197851	0.20662	0.225748	0.136459	0.0827127	0.105616	1
chr2:202897386-202901046*S_Shore	2	chr2:202897386-202901046	S_Shore	FZD7	0.00329539	0.0259628	4	3	cg11613003	202901288	0.00613254	0.11783	0.544185	0.702532	0.694579	-0.150394	0.114276	0.0974808	0.105398	1
chr2:220312698-220314094*Island	2	chr2:220312698-220314094	Island	SPEG	0.00355616	0.0273948	6	6	cg16440561	220312854	0.00180035	0.0500339	0.528803	0.451455	0.333662	0.195141	0.200022	0.149179	0.143633	1
chr5:140736821-140737058*N_Shore	5	chr5:140736821-140737058	N_Shore	PCDHGA3	0.00547474	0.0370373	4	4	cg24996161	140735397	0.00043388	0.0173304	0.675635	0.542007	0.513984	0.161651	0.131379	0.111278	0.0917493	1
chr5:140736821-140737058*N_Shore	5	chr5:140736821-140737058	N_Shore	PCDHGB1	0.00547474	0.0370373	4	4	cg24996161	140735397	0.00043388	0.0173304	0.675635	0.542007	0.513984	0.161651	0.131379	0.111278	0.0917493	1
chr5:140736821-140737058*N_Shore	5	chr5:140736821-140737058	N_Shore	PCDHGA4	0.00547474	0.0370373	4	4	cg24996161	140735397	0.00043388	0.0173304	0.675635	0.542007	0.513984	0.161651	0.131379	0.111278	0.0917493	1
chr5:140736821-140737058*N_Shore	5	chr5:140736821-140737058	N_Shore	PCDHGA2	0.00547474	0.0370373	4	4	cg24996161	140735397	0.00043388	0.0173304	0.675635	0.542007	0.513984	0.161651	0.131379	0.111278	0.0917493	1
chr5:140736821-140737058*N_Shore	5	chr5:140736821-140737058	N_Shore	PCDHGA1	0.00547474	0.0370373	4	4	cg24996161	140735397	0.00043388	0.0173304	0.675635	0.542007	0.513984	0.161651	0.131379	0.111278	0.0917493	1
chr16:31487152-31488967*Island	16	chr16:31487152-31488967	Island	TGFB1I1	0.00567122	0.0379074	6	6	cg16591159	31487813	0.000520772	0.019951	0.518996	0.355635	0.350211	0.168784	0.0845176	0.0992975	0.0803237	1
chr17:79495005-79496291*Island	17	chr17:79495005-79496291	Island	FSCN2	0.00696911	0.0432537	11	11	cg09084279	79495006	0.00902042	0.15167	0.786837	0.820589	0.812395	-0.0255584	0.0303845	0.0389696	0.0213909	1
chr10:74033167-74034698*Island	10	chr10:74033167-74034698	Island	DDIT4	8.90137e-19	3.4856e-15	12	12	cg10592592	74034663	1.19647e-19	2.34256e-15	0.434577	0.30417	0.289162	0.145415	0.0356926	0.0386791	0.0285819	0
chr14:24837872-24838324*N_Shore	14	chr14:24837872-24838324	N_Shore	NFATC4	6.13825e-18	1.40208e-14	7	7	cg13536265	24836539	4.05375e-17	2.89625e-13	0.246195	0.329789	0.34145	-0.0952555	0.0329907	0.0383103	0.0280244	0
chr17:80186135-80189990*Island	17	chr17:80186135-80189990	Island	SLC16A3	6.68375e-18	1.40208e-14	16	15	cg01944226	80188056	3.75502e-18	5.05864e-14	0.634857	0.723476	0.732077	-0.0972199	0.0343019	0.0344113	0.0341975	0
chr11:60619924-60621111*S_Shelf	11	chr11:60619924-60621111	S_Shelf	GPR44	1.23446e-17	2.2659e-14	9	8	cg19254163	60623782	1.98528e-18	2.91523e-14	0.64791	0.526659	0.546036	0.101873	0.0315513	0.0365304	0.0269539	0
chr2:40006090-40006463*S_Shore	2	chr2:40006090-40006463	S_Shore	THUMPD2	2.37908e-17	4.23454e-14	4	3	cg27611263	40007061	1.14636e-16	7.30326e-13	0.576823	0.419354	0.4659	0.110923	0.0477461	0.0582939	0.0444786	0
chr1:155108007-155108611*N_Shore	1	chr1:155108007-155108611	N_Shore	RAG1AP1	5.03034e-17	7.26558e-14	4	4	cg01554474	155107599	4.10906e-17	2.89625e-13	0.413662	0.248161	0.289025	0.124637	0.0365885	0.0508387	0.0402685	0
chr15:75639595-75640743*N_Shore	15	chr15:75639595-75640743	N_Shore	NEIL1	7.89443e-17	1.07007e-13	5	5	cg25938347	75639163	1.96235e-15	5.66864e-12	0.399833	0.525235	0.534192	-0.134359	0.0417471	0.0579893	0.0311251	0
chr17:39967407-39968604*S_Shore	17	chr17:39967407-39968604	S_Shore	FKBP10	6.13708e-16	5.7218e-13	11	9	cg21626848	39969267	2.18009e-16	1.0671e-12	0.301654	0.387653	0.405637	-0.103983	0.036842	0.0514746	0.0374862	0
chr17:39967407-39968604*S_Shore	17	chr17:39967407-39968604	S_Shore	SC65	6.13708e-16	5.7218e-13	11	9	cg21626848	39969267	2.18009e-16	1.0671e-12	0.301654	0.387653	0.405637	-0.103983	0.036842	0.0514746	0.0374862	0
chr1:210405952-210407250*S_Shore	1	chr1:210405952-210407250	S_Shore	SERTAD4	6.20478e-15	4.37295e-12	4	4	cg16118387	210407755	7.30587e-16	2.86083e-12	0.206235	0.310499	0.297576	-0.0913403	0.0216121	0.0475958	0.0305678	0
chr1:210405952-210407250*S_Shore	1	chr1:210405952-210407250	S_Shore	C1orf133	6.20478e-15	4.37295e-12	4	4	cg16118387	210407755	7.30587e-16	2.86083e-12	0.206235	0.310499	0.297576	-0.0913403	0.0216121	0.0475958	0.0305678	0
chr6:33167885-33168715*N_Shelf	6	chr6:33167885-33168715	N_Shelf	RXRB	6.47712e-15	4.37295e-12	12	11	cg01536956	33165577	1.25176e-13	1.98716e-10	0.83805	0.721523	0.732239	0.105811	0.0313856	0.0546547	0.0266341	0
chr1:46016403-46016694*N_Shore	1	chr1:46016403-46016694	N_Shore	AKR1A1	7.9849e-15	5.28957e-12	5	5	cg24332710	46016173	1.33324e-16	7.57842e-13	0.497175	0.356833	0.368498	0.128677	0.0420601	0.0388433	0.0459361	0
chr19:18543828-18549161*Island	19	chr19:18543828-18549161	Island	SSBP4	1.08773e-14	6.38899e-12	20	17	cg24878115	18545062	1.70473e-15	5.17917e-12	0.929844	0.80067	0.807572	0.122272	0.0223513	0.0501581	0.0369481	0
chr16:776636-779417*Island	16	chr16:776636-779417	Island	HAGHL	1.48555e-14	7.79077e-12	16	16	cg01468220	779026	2.91194e-12	2.85065e-09	0.763841	0.652964	0.643761	0.12008	0.0398381	0.0673187	0.0378306	0
chr17:42143654-42144096*S_Shore	17	chr17:42143654-42144096	S_Shore	LSM12	2.22391e-14	1.1425e-11	4	4	cg16674514	42145043	4.0265e-16	1.77378e-12	0.670386	0.525683	0.54315	0.127236	0.0360943	0.0607211	0.0576856	0
chr1:32740710-32741544*N_Shore	1	chr1:32740710-32741544	N_Shore	LCK	2.41431e-14	1.19117e-11	6	6	cg10250177	32739752	1.54131e-15	4.9381e-12	0.217861	0.371105	0.359493	-0.141632	0.0371779	0.0555432	0.0543841	0
chr11:1947531-1947958*Island	11	chr11:1947531-1947958	Island	TNNT3	2.49962e-14	1.21674e-11	4	4	cg06455375	1947743	1.3266e-13	2.05738e-10	0.569034	0.41539	0.419438	0.149596	0.0658858	0.0647173	0.0444958	0
chr7:27143181-27143479*N_Shore	7	chr7:27143181-27143479	N_Shore	HOXA2	3.02345e-14	1.40201e-11	18	18	cg09871315	27142682	1.31665e-15	4.54919e-12	0.179253	0.301405	0.274372	-0.0951192	0.0349328	0.0517546	0.0341278	0
chr8:146012190-146012913*S_Shore	8	chr8:146012190-146012913	S_Shore	ZNF34	3.667e-14	1.64419e-11	6	6	cg05483406	146013229	1.74143e-15	5.201e-12	0.653261	0.570296	0.571425	0.0818358	0.0313472	0.0511197	0.0299696	0
chr6:33159991-33160263*S_Shore	6	chr6:33159991-33160263	S_Shore	RXRB	3.95995e-14	1.74012e-11	8	8	cg17560929	33161589	1.33102e-13	2.05738e-10	0.669006	0.605446	0.622386	0.0466197	0.0285635	0.0563364	0.032564	0
chr6:33159991-33160263*S_Shore	6	chr6:33159991-33160263	S_Shore	COL11A2	3.95995e-14	1.74012e-11	8	8	cg17560929	33161589	1.33102e-13	2.05738e-10	0.669006	0.605446	0.622386	0.0466197	0.0285635	0.0563364	0.032564	0
chr11:67203319-67203662*S_Shelf	11	chr11:67203319-67203662	S_Shelf	CORO1B	9.91536e-14	4.05382e-11	9	8	cg02222982	67207599	1.95034e-15	5.66864e-12	0.527824	0.41036	0.415851	0.111973	0.0339131	0.0462826	0.0325824	0
chr11:66631254-66631470*S_Shelf	11	chr11:66631254-66631470	S_Shelf	PC	1.00133e-13	4.06556e-11	3	3	cg06880963	66634970	6.82972e-14	1.14616e-10	0.593323	0.677316	0.686094	-0.0927705	0.0325102	0.0375968	0.0343104	0
chr5:76249435-76250528*N_Shore	5	chr5:76249435-76250528	N_Shore	CRHBP	1.19468e-13	4.79535e-11	6	5	cg06495038	76247647	2.49141e-13	3.35126e-10	0.524408	0.383402	0.407442	0.116966	0.0495903	0.0566961	0.0256881	0
chr20:3641130-3642114*S_Shelf	20	chr20:3641130-3642114	S_Shelf	GFRA4	1.38881e-13	5.51178e-11	5	5	cg06919203	3644151	1.22435e-14	2.76595e-11	0.765629	0.641697	0.615742	0.149888	0.0374444	0.0645049	0.0370758	0
chr17:80194424-80194777*Island	17	chr17:80194424-80194777	Island	SLC16A3	1.78377e-13	6.83304e-11	3	3	cg15437741	80194576	4.61905e-13	5.94107e-10	0.627777	0.545739	0.560962	0.0668153	0.0260199	0.0507176	0.031764	0
chr7:150746002-150746381*N_Shore	7	chr7:150746002-150746381	N_Shore	ACCN3	2.52068e-13	9.23435e-11	10	10	cg12513221	150744599	2.69923e-15	7.67151e-12	0.335163	0.204589	0.228807	0.106356	0.0212811	0.0383132	0.0377231	0
chr7:150746002-150746381*N_Shore	7	chr7:150746002-150746381	N_Shore	ABCB8	2.52068e-13	9.23435e-11	10	10	cg12513221	150744599	2.69923e-15	7.67151e-12	0.335163	0.204589	0.228807	0.106356	0.0212811	0.0383132	0.0377231	0
chr19:45754630-45755261*N_Shore	19	chr19:45754630-45755261	N_Shore	MARK4	2.63767e-13	9.60304e-11	3	3	cg15642326	45754146	1.77882e-13	2.54835e-10	0.299634	0.216511	0.22582	0.0738144	0.0246877	0.0323402	0.0187372	0
chr20:57426729-57427047*N_Shore	20	chr20:57426729-57427047	N_Shore	GNAS	2.85428e-13	9.90069e-11	24	24	cg21779904	57425157	1.37898e-13	2.11297e-10	0.270947	0.354473	0.376166	-0.105218	0.0305267	0.0352032	0.0264053	0
chr20:57426729-57427047*N_Shore	20	chr20:57426729-57427047	N_Shore	GNASAS	2.85428e-13	9.90069e-11	24	24	cg21779904	57425157	1.37898e-13	2.11297e-10	0.270947	0.354473	0.376166	-0.105218	0.0305267	0.0352032	0.0264053	0
chr6:29595298-29595795*N_Shore	6	chr6:29595298-29595795	N_Shore	GABBR1	2.97006e-13	1.01034e-10	11	10	cg26129669	29593913	1.95576e-14	4.15213e-11	0.530631	0.428496	0.445183	0.0854475	0.0333063	0.0375387	0.0335637	0
chr17:46675044-46675589*S_Shelf	17	chr17:46675044-46675589	S_Shelf	HOXB6	6.43665e-13	2.1082e-10	3	3	cg02566861	46679516	6.06802e-15	1.54964e-11	0.217387	0.372302	0.366306	-0.148918	0.03419	0.0632574	0.0399444	0
chr17:46675044-46675589*S_Shelf	17	chr17:46675044-46675589	S_Shelf	LOC404266	6.43665e-13	2.1082e-10	3	3	cg02566861	46679516	6.06802e-15	1.54964e-11	0.217387	0.372302	0.366306	-0.148918	0.03419	0.0632574	0.0399444	0
chr7:5521368-5521615*N_Shelf	7	chr7:5521368-5521615	N_Shelf	FBXL18	9.34519e-13	2.9995e-10	4	4	cg00232092	5518887	3.69796e-14	6.85917e-11	0.601479	0.489293	0.510842	0.0906362	0.0431533	0.0682334	0.0543017	0
chr11:118781060-118781732*S_Shore	11	chr11:118781060-118781732	S_Shore	BCL9L	9.45458e-13	3.00722e-10	5	5	cg02341556	118781978	2.56945e-14	5.08726e-11	0.702373	0.583364	0.586701	0.115672	0.0381185	0.0416226	0.0341765	0
chr1:228345377-228346700*Island	1	chr1:228345377-228346700	Island	GJC2	1.11979e-12	3.50478e-10	6	6	cg08521967	228345490	9.95135e-15	2.33805e-11	0.42715	0.566548	0.550741	-0.123592	0.029404	0.0454465	0.0326018	0
chr2:97202313-97203787*S_Shore	2	chr2:97202313-97203787	S_Shore	ARID5A	1.18561e-12	3.69113e-10	3	3	cg13112407	97204931	8.54494e-13	9.97161e-10	0.129908	0.202198	0.206558	-0.0766497	0.0198106	0.0210717	0.0245515	0
chr17:79259282-79259537*S_Shore	17	chr17:79259282-79259537	S_Shore	SLC38A10	1.20859e-12	3.73625e-10	4	4	cg22186315	79259963	1.89043e-14	4.06238e-11	0.564009	0.681763	0.700187	-0.136178	0.048204	0.06242	0.0434591	0
chr19:55992577-55996916*Island	19	chr19:55992577-55996916	Island	NAT14	1.27675e-12	3.83919e-10	18	16	cg23258940	55995851	5.71517e-14	9.68341e-11	0.665492	0.561359	0.571636	0.0938563	0.0253142	0.050885	0.0310638	0
chr19:55992577-55996916*Island	19	chr19:55992577-55996916	Island	ZNF628	1.27675e-12	3.83919e-10	18	16	cg23258940	55995851	5.71517e-14	9.68341e-11	0.665492	0.561359	0.571636	0.0938563	0.0253142	0.050885	0.0310638	0
chr8:144651572-144652288*N_Shore	8	chr8:144651572-144652288	N_Shore	C8orf73	1.31909e-12	3.84451e-10	4	4	cg04022537	144650595	4.73261e-11	2.99871e-08	0.574225	0.472959	0.474052	0.100174	0.0308987	0.0464678	0.0372518	0
chr5:68788151-68789823*Island	5	chr5:68788151-68789823	Island	OCLN	1.7071e-12	4.87537e-10	5	5	cg10629249	68789822	1.702e-11	1.27913e-08	0.214806	0.130867	0.135963	0.0788422	0.0273175	0.0232868	0.0215614	0
chr17:40610746-40611032*S_Shore	17	chr17:40610746-40611032	S_Shore	ATP6V0A1	1.82839e-12	5.18812e-10	4	4	cg05922563	40611593	4.09082e-14	7.43142e-11	0.446307	0.281438	0.306478	0.139829	0.0510702	0.0498269	0.0468927	0
chr11:45943513-45944852*Island	11	chr11:45943513-45944852	Island	GYLTL1B	1.89444e-12	5.32772e-10	5	5	cg05265359	45943572	6.2778e-12	5.64672e-09	0.496689	0.375451	0.377162	0.119527	0.0443713	0.0443318	0.0364384	0
chr14:23770512-23771902*N_Shore	14	chr14:23770512-23771902	N_Shore	PPP1R3E	1.90178e-12	5.32772e-10	3	3	cg09337121	23769999	5.2591e-14	9.122e-11	0.361488	0.207423	0.220612	0.140876	0.0417673	0.0386704	0.0309603	0
chr12:6664425-6665336*N_Shore	12	chr12:6664425-6665336	N_Shore	IFFO1	2.27737e-12	6.34964e-10	3	3	cg24853956	6663682	5.56448e-13	6.80918e-10	0.529962	0.442626	0.467518	0.0624439	0.0298773	0.0283122	0.0289628	0
chr2:98340397-98340959*Island	2	chr2:98340397-98340959	Island	ZAP70	2.44045e-12	6.76155e-10	4	4	cg14131536	98340921	2.13899e-11	1.55108e-08	0.961515	0.882045	0.85543	0.106085	0.0153883	0.0795102	0.0544152	0
chr3:128712404-128713058*Island	3	chr3:128712404-128713058	Island	KIAA1257	3.49822e-12	9.39672e-10	6	6	cg13740709	128712555	8.4957e-14	1.38614e-10	0.563895	0.462586	0.478057	0.0858385	0.0374186	0.0495484	0.031643	0
chr19:49132603-49134291*Island	19	chr19:49132603-49134291	Island	DBP	4.45371e-12	1.18549e-09	6	6	cg21721681	49133845	5.38527e-14	9.21305e-11	0.454034	0.343623	0.354261	0.0997732	0.0332822	0.0450799	0.0305686	0
chr13:47126970-47128706*N_Shore	13	chr13:47126970-47128706	N_Shore	LRCH1	4.79683e-12	1.25782e-09	7	7	cg19833103	47126551	4.7978e-14	8.53964e-11	0.480799	0.323965	0.348357	0.132442	0.0481315	0.06348	0.0381413	0
chr11:61734760-61735932*N_Shore	11	chr11:61734760-61735932	N_Shore	FTH1	5.42077e-12	1.41093e-09	5	5	cg01209023	61733046	3.98448e-12	3.79519e-09	0.38067	0.239419	0.263539	0.117131	0.0388744	0.0429128	0.0270962	0
chr20:44034458-44035954*S_Shore	20	chr20:44034458-44035954	S_Shore	SYS1-DBNDD2	5.99617e-12	1.4973e-09	6	6	cg06721796	44037519	2.47202e-13	3.35074e-10	0.36617	0.287113	0.272893	0.0932767	0.0298867	0.0294754	0.0279293	0
chr20:44034458-44035954*S_Shore	20	chr20:44034458-44035954	S_Shore	DBNDD2	5.99617e-12	1.4973e-09	6	6	cg06721796	44037519	2.47202e-13	3.35074e-10	0.36617	0.287113	0.272893	0.0932767	0.0298867	0.0294754	0.0279293	0
chr19:44278273-44278777*Island	19	chr19:44278273-44278777	Island	KCNN4	6.016e-12	1.4973e-09	3	3	cg22904711	44278628	1.71642e-13	2.49961e-10	0.88847	0.743395	0.755556	0.132914	0.0322023	0.0648679	0.0375195	0
chr19:1274469-1276358*Island	19	chr19:1274469-1276358	Island	C19orf24	6.93283e-12	1.69908e-09	10	8	cg06653052	1275167	1.57578e-13	2.37325e-10	0.28274	0.136452	0.151129	0.131611	0.0574389	0.0406654	0.0378505	0
chr11:45234222-45234428*N_Shelf	11	chr11:45234222-45234428	N_Shelf	PRDM11	7.79632e-12	1.89228e-09	7	7	cg05515072	45231326	1.76758e-09	6.55721e-07	0.356094	0.287056	0.299288	0.0568063	0.0328078	0.0347	0.0234798	0
chr1:1149055-1149524*Island	1	chr1:1149055-1149524	Island	TNFRSF4	9.0857e-12	2.18861e-09	4	4	cg14661234	1149192	2.58719e-12	2.5903e-09	0.16179	0.301159	0.284988	-0.123197	0.0248785	0.0535882	0.0413657	0
chr6:27114222-27115181*Island	6	chr6:27114222-27115181	Island	HIST1H2AH	9.15382e-12	2.18861e-09	7	7	cg20338307	27114586	2.85127e-11	1.99375e-08	0.270011	0.180178	0.194221	0.07579	0.0286655	0.0294231	0.0278612	0
chr6:27114222-27115181*Island	6	chr6:27114222-27115181	Island	HIST1H2BK	9.15382e-12	2.18861e-09	7	7	cg20338307	27114586	2.85127e-11	1.99375e-08	0.270011	0.180178	0.194221	0.07579	0.0286655	0.0294231	0.0278612	0
chr2:73297630-73299155*S_Shore	2	chr2:73297630-73299155	S_Shore	SFXN5	9.80011e-12	2.33048e-09	4	4	cg07452306	73299297	1.62184e-12	1.73497e-09	0.38342	0.306845	0.31155	0.0718694	0.0253003	0.0348448	0.0245935	0
chr12:123470553-123471102*N_Shore	12	chr12:123470553-123471102	N_Shore	PITPNM2	1.03806e-11	2.45857e-09	4	3	cg09931783	123469669	1.29757e-13	2.04148e-10	0.586828	0.474106	0.491075	0.0957527	0.0428906	0.0512223	0.0467184	0
chr7:2059907-2060131*N_Shore	7	chr7:2059907-2060131	N_Shore	MAD1L1	1.13899e-11	2.67604e-09	6	6	cg02305113	2059212	7.80934e-13	9.17394e-10	0.517928	0.430988	0.442839	0.0750893	0.035063	0.0515144	0.0309399	0
chr11:129685737-129686211*N_Shore	11	chr11:129685737-129686211	N_Shore	TMEM45B	1.31958e-11	3.06356e-09	9	9	cg07688490	129685695	2.32378e-13	3.24981e-10	0.255957	0.179305	0.121271	0.134686	0.0344118	0.0527966	0.0322063	0
chr17:40688033-40688745*N_Shore	17	chr17:40688033-40688745	N_Shore	NAGLU	1.46071e-11	3.32121e-09	10	10	cg14787477	40687596	5.68523e-10	2.52343e-07	0.613184	0.553751	0.559101	0.054083	0.0277614	0.0343296	0.0348408	0
chr6:33244677-33245554*S_Shore	6	chr6:33244677-33245554	S_Shore	B3GALT4	1.55342e-11	3.39193e-09	39	32	cg17103217	33245721	1.91668e-11	1.40725e-08	0.388044	0.322719	0.33181	0.0562335	0.0319861	0.0403505	0.027201	0
chr6:44232880-44233447*S_Shore	6	chr6:44232880-44233447	S_Shore	NFKBIE	1.5762e-11	3.42893e-09	3	3	cg15787744	44234175	2.34501e-13	3.25367e-10	0.439179	0.550887	0.5546	-0.115421	0.0368159	0.0386203	0.0350212	0
chr17:8380172-8380539*N_Shore	17	chr17:8380172-8380539	N_Shore	MYH10	1.62058e-11	3.50386e-09	5	5	cg25921609	8379225	5.51996e-13	6.80194e-10	0.715785	0.592313	0.575635	0.140149	0.0522496	0.0598525	0.063347	0
chr11:128562671-128565011*N_Shore	11	chr11:128562671-128565011	N_Shore	FLI1	1.92178e-11	3.97464e-09	9	7	cg11886358	128561007	2.4631e-13	3.35074e-10	0.680274	0.548856	0.5666	0.113674	0.0420262	0.069058	0.0567139	0
chr19:49223054-49223312*N_Shelf	19	chr19:49223054-49223312	N_Shelf	MAMSTR	1.93687e-11	3.97783e-09	6	6	cg12234455	49220235	1.44854e-11	1.14977e-08	0.503143	0.435198	0.445651	0.0574916	0.0310192	0.0337731	0.0255928	0
chr1:246729207-246730276*N_Shore	1	chr1:246729207-246730276	N_Shore	TFB2M	2.03049e-11	4.15557e-09	3	3	cg17815049	246728663	1.57219e-12	1.70985e-09	0.477263	0.353513	0.333058	0.144206	0.0567956	0.0554445	0.0422018	0
chr1:246729207-246730276*N_Shore	1	chr1:246729207-246730276	N_Shore	CNST	2.03049e-11	4.15557e-09	3	3	cg17815049	246728663	1.57219e-12	1.70985e-09	0.477263	0.353513	0.333058	0.144206	0.0567956	0.0554445	0.0422018	0
chr13:103425298-103426887*Island	13	chr13:103425298-103426887	Island	C13orf27	2.22834e-11	4.44687e-09	12	11	cg04015777	103426481	5.52911e-08	1.17893e-05	0.346374	0.299816	0.281639	0.0647347	0.0422138	0.0809637	0.0395752	0
chr6:35995245-35996372*N_Shelf	6	chr6:35995245-35996372	N_Shelf	SLC26A8	2.27374e-11	4.50683e-09	6	6	cg25123266	35992520	4.18364e-12	3.94226e-09	0.19107	0.244958	0.23993	-0.0488597	0.0231056	0.0283515	0.0199998	0
chr17:8868469-8869372*S_Shore	17	chr17:8868469-8869372	S_Shore	PIK3R5	2.70438e-11	5.22523e-09	3	3	cg09302474	8869948	3.26393e-13	4.2603e-10	0.423228	0.490164	0.506384	-0.0831561	0.0489942	0.0420391	0.0567318	0
chr1:206223537-206224028*S_Shore	1	chr1:206223537-206224028	S_Shore	AVPR1B	2.89084e-11	5.56718e-09	3	3	cg08709672	206224334	4.67627e-12	4.33689e-09	0.70985	0.604991	0.627096	0.0827531	0.0316804	0.0438794	0.0334199	0
chr4:141173834-141174567*S_Shelf	4	chr4:141173834-141174567	S_Shelf	SCOC	3.24067e-11	6.18011e-09	6	6	cg04761746	141177756	1.91782e-12	1.97626e-09	0.530883	0.464223	0.475855	0.0550276	0.0235695	0.0420054	0.0299051	0
chr1:228327508-228328560*S_Shelf	1	chr1:228327508-228328560	S_Shelf	GUK1	3.45616e-11	6.5185e-09	5	5	cg26841040	228332263	6.08113e-13	7.39008e-10	0.510448	0.57825	0.552565	-0.0421166	0.0318307	0.0281092	0.0288154	0
chr11:124492664-124493153*N_Shelf	11	chr11:124492664-124493153	N_Shelf	PANX3	3.47335e-11	6.5185e-09	3	3	cg27371539	124488923	3.2233e-12	3.13801e-09	0.785096	0.697506	0.714711	0.070385	0.0249329	0.042094	0.0316754	0
chr14:104193901-104194627*S_Shore	14	chr14:104193901-104194627	S_Shore	ZFYVE21	3.4736e-11	6.5185e-09	7	7	cg19838043	104196038	6.91126e-13	8.28462e-10	0.748798	0.574849	0.631229	0.117569	0.0357334	0.0687462	0.0555037	0
chr19:1957774-1958038*Island	19	chr19:1957774-1958038	Island	CSNK1G2	3.72829e-11	6.97417e-09	3	3	cg08307171	1957775	3.68119e-12	3.54462e-09	0.706477	0.645423	0.643339	0.0631378	0.0310172	0.041832	0.0287964	0
chr17:56609025-56609583*N_Shelf	17	chr17:56609025-56609583	N_Shelf	2014-09-04	3.76583e-11	7.0146e-09	4	4	cg00934987	56605468	7.18684e-11	4.2969e-08	0.253861	0.329054	0.358504	-0.104643	0.0358412	0.0400378	0.0278643	0
chr7:150934649-150934869*S_Shore	7	chr7:150934649-150934869	S_Shore	CHPF2	3.87719e-11	7.17651e-09	6	6	cg18479961	150935476	7.35469e-13	8.7566e-10	0.488507	0.606795	0.614074	-0.125567	0.0437841	0.0669402	0.0419087	0
chr7:150934649-150934869*S_Shore	7	chr7:150934649-150934869	S_Shore	MIR671	3.87719e-11	7.17651e-09	6	6	cg18479961	150935476	7.35469e-13	8.7566e-10	0.488507	0.606795	0.614074	-0.125567	0.0437841	0.0669402	0.0419087	0
chr17:19281000-19282541*Island	17	chr17:19281000-19282541	Island	MAPK7	5.10507e-11	9.32197e-09	13	13	cg13832201	19282521	4.74795e-11	2.99871e-08	0.69084	0.606278	0.613084	0.0777561	0.0328945	0.0493714	0.0317988	0
chr18:42258983-42260795*S_Shore	18	chr18:42258983-42260795	S_Shore	SETBP1	5.80417e-11	1.05114e-08	3	3	cg24217948	42261980	1.24546e-12	1.38902e-09	0.526151	0.573025	0.660011	-0.133859	0.0387976	0.0657001	0.0445178	0
chr15:62456015-62457648*S_Shore	15	chr15:62456015-62457648	S_Shore	C2CD4B	5.94366e-11	1.07199e-08	4	4	cg02068166	62458741	1.3849e-11	1.11194e-08	0.30242	0.432519	0.433421	-0.131001	0.0373584	0.06811	0.0456411	0
chr11:46389074-46389378*Island	11	chr11:46389074-46389378	Island	DGKZ	6.2768e-11	1.12746e-08	4	4	cg24713122	46389164	3.05725e-10	1.48818e-07	0.199631	0.154984	0.168015	0.0316165	0.0245755	0.0275644	0.0232482	0
chr16:87702493-87702704*S_Shore	16	chr16:87702493-87702704	S_Shore	JPH3	6.51563e-11	1.16561e-08	4	4	cg04271322	87703448	1.08703e-12	1.23578e-09	0.672487	0.587914	0.578737	0.0937503	0.0312414	0.0645115	0.0386648	0
chr11:64879046-64880413*S_Shore	11	chr11:64879046-64880413	S_Shore	TM7SF2	6.66794e-11	1.18924e-08	3	3	cg07471203	64880911	5.13609e-12	4.73137e-09	0.745409	0.648657	0.639552	0.105857	0.0287297	0.0501766	0.0322237	0
chr21:43186280-43187436*N_Shore	21	chr21:43186280-43187436	N_Shore	RIPK4	6.85253e-11	1.2147e-08	5	5	cg08811332	43185385	4.07452e-12	3.86008e-09	0.384283	0.491565	0.493024	-0.108741	0.03095	0.037032	0.0475129	0
chr5:169533080-169533534*N_Shore	5	chr5:169533080-169533534	N_Shore	FOXI1	6.90036e-11	1.2147e-08	8	8	cg03817107	169532775	6.14254e-12	5.5793e-09	0.633421	0.551728	0.569811	0.0636102	0.0294926	0.0565827	0.0243894	0
chr20:35974177-35974913*N_Shore	20	chr20:35974177-35974913	N_Shore	SRC	7.0408e-11	1.22838e-08	9	9	cg11210813	35972385	1.11412e-11	9.21687e-09	0.210207	0.360453	0.342838	-0.132631	0.0415603	0.0668403	0.0563426	0
chr10:11207178-11207980*N_Shore	10	chr10:11207178-11207980	N_Shore	CUGBP2	7.66891e-11	1.3171e-08	10	10	cg04221117	11206221	9.12924e-12	7.697e-09	0.149063	0.0594291	0.0644182	0.0846449	0.0324611	0.0168458	0.0153557	0
chr10:104180478-104182042*Island	10	chr10:104180478-104182042	Island	FBXL15	8.80636e-11	1.49785e-08	6	6	cg14266862	104181982	7.02601e-11	4.2545e-08	0.154372	0.0686079	0.073203	0.0811691	0.0377568	0.0159029	0.017514	0
chr11:459088-459345*N_Shore	11	chr11:459088-459345	N_Shore	PTDSS2	9.24797e-11	1.56692e-08	4	4	cg24420089	457304	1.72089e-12	1.81581e-09	0.302898	0.418125	0.393134	-0.0902363	0.0556796	0.0493061	0.0355235	0
chr16:31225956-31228264*N_Shore	16	chr16:31225956-31228264	N_Shore	TRIM72	9.99981e-11	1.68458e-08	3	3	cg27124512	31225350	2.75368e-12	2.72601e-09	0.581924	0.64219	0.658005	-0.0760811	0.0251026	0.0535574	0.0256337	0
chr2:157184389-157184632*Island	2	chr2:157184389-157184632	Island	NR4A2	1.04711e-10	1.74645e-08	5	5	cg09906382	157184416	3.34746e-11	2.25029e-08	0.447893	0.521446	0.545844	-0.0979515	0.0395206	0.0594626	0.0417893	0
chr16:85644947-85649027*Island	16	chr16:85644947-85649027	Island	KIAA0182	1.05851e-10	1.74645e-08	21	17	cg13441891	85648370	6.22443e-11	3.84847e-08	0.365888	0.276271	0.285843	0.0800451	0.0369904	0.041582	0.0436733	0
chr7:2442792-2444011*S_Shore	7	chr7:2442792-2444011	S_Shore	CHST12	1.16017e-10	1.90527e-08	5	5	cg10152449	2444534	7.56825e-12	6.63487e-09	0.331131	0.231618	0.242502	0.0886284	0.0467537	0.0499761	0.0438924	0
chr10:465928-466396*S_Shore	10	chr10:465928-466396	S_Shore	DIP2C	1.22887e-10	2.00501e-08	8	7	cg02594677	468386	5.75446e-12	5.25388e-09	0.473322	0.597403	0.585049	-0.111727	0.0326134	0.0510307	0.0362328	0
chr19:48983562-48984175*Island	19	chr19:48983562-48984175	Island	CYTH2	1.26179e-10	2.05301e-08	3	3	cg15246590	48983600	3.9556e-12	3.78815e-09	0.576541	0.496384	0.466167	0.110374	0.0328507	0.0378784	0.0312131	0
chr6:30042918-30043500*S_Shore	6	chr6:30042918-30043500	S_Shore	RNF39	1.39549e-10	2.24356e-08	14	13	cg15448721	30045041	2.60252e-11	1.85665e-08	0.381389	0.456876	0.466314	-0.0849245	0.0290536	0.0259146	0.0267418	0
chr20:3218578-3220930*N_Shore	20	chr20:3218578-3220930	N_Shore	SLC4A11	1.49394e-10	2.37161e-08	9	9	cg11004890	3218500	8.84343e-12	7.52806e-09	0.629383	0.501982	0.495149	0.134234	0.0513479	0.0575482	0.0469372	0
chr16:3073686-3074443*N_Shore	16	chr16:3073686-3074443	N_Shore	THOC6	1.70388e-10	2.69275e-08	5	5	cg27269561	3072713	4.78898e-10	2.19758e-07	0.247237	0.179168	0.202867	0.0443698	0.0243586	0.0282766	0.0198968	0
chr16:3073686-3074443*N_Shore	16	chr16:3073686-3074443	N_Shore	HCFC1R1	1.70388e-10	2.69275e-08	5	5	cg27269561	3072713	4.78898e-10	2.19758e-07	0.247237	0.179168	0.202867	0.0443698	0.0243586	0.0282766	0.0198968	0
chr20:60639272-60639835*Island	20	chr20:60639272-60639835	Island	TAF4	1.75629e-10	2.76814e-08	3	3	cg14080585	60639721	2.14778e-11	1.55108e-08	0.701759	0.596237	0.580086	0.121672	0.0410505	0.0508611	0.0403773	0
chr1:38273374-38274402*N_Shore	1	chr1:38273374-38274402	N_Shore	YRDC	2.04327e-10	3.07733e-08	6	6	cg00095214	38272200	4.17348e-10	1.94554e-07	0.763174	0.678931	0.688149	0.0750244	0.0354584	0.0406194	0.0332026	0
chr1:38273374-38274402*N_Shore	1	chr1:38273374-38274402	N_Shore	C1orf122	2.04327e-10	3.07733e-08	6	6	cg00095214	38272200	4.17348e-10	1.94554e-07	0.763174	0.678931	0.688149	0.0750244	0.0354584	0.0406194	0.0332026	0
chr4:3374733-3374998*N_Shelf	4	chr4:3374733-3374998	N_Shelf	RGS12	2.20867e-10	3.30104e-08	10	9	cg20495365	3371291	6.18086e-10	2.70257e-07	0.547367	0.468234	0.486101	0.0612665	0.0361407	0.0397775	0.031528	0
chr15:101513245-101514323*Island	15	chr15:101513245-101514323	Island	LRRK1	2.22729e-10	3.3176e-08	4	4	cg19190699	101514156	1.58293e-11	1.22491e-08	0.298363	0.390759	0.384444	-0.0860811	0.032472	0.0310069	0.0301396	0
chr8:145137176-145138235*Island	8	chr8:145137176-145138235	Island	GPAA1	2.32198e-10	3.4383e-08	7	7	cg10137990	145137203	7.27428e-12	6.40904e-09	0.0773114	0.0281659	0.0288802	0.0484312	0.0206261	0.00556395	0.00655727	0
chr19:1423752-1424006*Island	19	chr19:1423752-1424006	Island	DAZAP1	2.35714e-10	3.4816e-08	3	3	cg10133935	1423753	9.73908e-10	3.93609e-07	0.504085	0.451417	0.46137	0.0427154	0.0587863	0.0547164	0.058979	0
chr16:28890954-28891868*N_Shelf	16	chr16:28890954-28891868	N_Shelf	ATP2A1	2.40869e-10	3.54881e-08	3	3	cg05836943	28888925	2.80606e-12	2.76234e-09	0.224965	0.31084	0.305975	-0.0810095	0.027087	0.0229687	0.0170711	0
chr19:38182793-38183327*S_Shore	19	chr19:38182793-38183327	S_Shore	ZNF781	2.54453e-10	3.73646e-08	4	4	cg10710439	38183976	1.57823e-11	1.22491e-08	0.75014	0.646415	0.651908	0.0982313	0.0279552	0.0619579	0.0366494	0
chr10:134913543-134914039*Island	10	chr10:134913543-134914039	Island	GPR123	2.75718e-10	4.00202e-08	3	3	cg03906820	134913608	1.00542e-11	8.35688e-09	0.788721	0.851422	0.853824	-0.065103	0.0249735	0.0206004	0.0218477	0
chr7:1753446-1753706*Island	7	chr7:1753446-1753706	Island	ELFN1	2.8621e-10	4.13727e-08	5	5	cg21422016	1753659	7.66346e-11	4.51634e-08	0.764471	0.673257	0.665815	0.0986556	0.0286975	0.0660831	0.0360751	0
chr11:75110493-75110924*S_Shelf	11	chr11:75110493-75110924	S_Shelf	RPS3	2.91473e-10	4.19957e-08	4	4	cg05122026	75114223	2.74222e-11	1.92513e-08	0.707361	0.650764	0.658454	0.0489077	0.033334	0.0496174	0.0307522	0
chr11:75110493-75110924*S_Shelf	11	chr11:75110493-75110924	S_Shelf	SNORD15B	2.91473e-10	4.19957e-08	4	4	cg05122026	75114223	2.74222e-11	1.92513e-08	0.707361	0.650764	0.658454	0.0489077	0.033334	0.0496174	0.0307522	0
chr17:74448388-74449424*S_Shore	17	chr17:74448388-74449424	S_Shore	UBE2O	2.98639e-10	4.29229e-08	3	3	cg00912149	74449810	8.3118e-12	7.14454e-09	0.537729	0.463321	0.473361	0.0643681	0.0287969	0.0408967	0.0269596	0
chr17:74448388-74449424*S_Shore	17	chr17:74448388-74449424	S_Shore	AANAT	2.98639e-10	4.29229e-08	3	3	cg00912149	74449810	8.3118e-12	7.14454e-09	0.537729	0.463321	0.473361	0.0643681	0.0287969	0.0408967	0.0269596	0
chr17:79006584-79006835*N_Shore	17	chr17:79006584-79006835	N_Shore	FLJ90757	3.04585e-10	4.34585e-08	9	9	cg17830209	79006166	6.46248e-10	2.79794e-07	0.377314	0.488584	0.507772	-0.130458	0.0377809	0.0419318	0.0411077	0
chr6:32121829-32122529*S_Shore	6	chr6:32121829-32122529	S_Shore	PPT2	3.8763e-10	5.46438e-08	17	15	cg06832687	32122753	4.50451e-10	2.07787e-07	0.18497	0.1343	0.134867	0.0501034	0.0276712	0.0206184	0.0162583	0
chr11:45825615-45826872*N_Shore	11	chr11:45825615-45826872	N_Shore	SLC35C1	3.96227e-10	5.54123e-08	10	10	cg17695841	45825485	4.91003e-09	1.56456e-06	0.545578	0.625707	0.618021	-0.0724429	0.0370328	0.0501598	0.0392806	0
chr1:2158212-2161173*Island	1	chr1:2158212-2161173	Island	SKI	4.14989e-10	5.7534e-08	12	11	cg01979157	2161013	6.23668e-10	2.72023e-07	0.1597	0.101867	0.107287	0.0524133	0.024611	0.0198487	0.0182169	0
chr1:3163969-3164643*Island	1	chr1:3163969-3164643	Island	PRDM16	4.39132e-10	6.05951e-08	6	6	cg21475097	3164642	2.91499e-11	2.02226e-08	0.118526	0.206428	0.21381	-0.0952834	0.0248665	0.0430415	0.0330102	0
chr22:39541022-39542137*Island	22	chr22:39541022-39542137	Island	CBX7	4.43886e-10	6.08391e-08	4	4	cg05903330	39542136	9.60473e-11	5.53091e-08	0.268602	0.195782	0.202438	0.0661643	0.0410167	0.0304297	0.0311914	0
chr15:90198100-90198833*S_Shore	15	chr15:90198100-90198833	S_Shore	KIF7	4.92469e-10	6.69587e-08	4	4	cg08869547	90199883	7.48853e-10	3.17967e-07	0.663218	0.796113	0.804012	-0.140794	0.0472889	0.0465113	0.0351376	0
chr2:27308546-27309770*N_Shore	2	chr2:27308546-27309770	N_Shore	EMILIN1	5.10645e-10	6.89511e-08	3	3	cg06293611	27308434	6.71779e-11	4.09856e-08	0.785272	0.655587	0.663703	0.121569	0.033246	0.0448909	0.0428745	0
chr2:27308546-27309770*N_Shore	2	chr2:27308546-27309770	N_Shore	KHK	5.10645e-10	6.89511e-08	3	3	cg06293611	27308434	6.71779e-11	4.09856e-08	0.785272	0.655587	0.663703	0.121569	0.033246	0.0448909	0.0428745	0
chr3:9791123-9792011*N_Shore	3	chr3:9791123-9792011	N_Shore	OGG1	5.15637e-10	6.92774e-08	3	3	cg25415932	9791051	3.35862e-11	2.25029e-08	0.402113	0.353513	0.349783	0.0523302	0.026535	0.0380569	0.019884	0
chr1:3059050-3059268*N_Shore	1	chr1:3059050-3059268	N_Shore	PRDM16	5.16992e-10	6.92774e-08	7	7	cg22510139	3058822	6.95996e-12	6.19404e-09	0.550676	0.444335	0.434215	0.116461	0.0412301	0.0585751	0.0309943	0
chr17:78798780-78799160*S_Shore	17	chr17:78798780-78799160	S_Shore	RPTOR	5.43253e-10	7.15371e-08	10	8	cg25337513	78800631	1.35819e-10	7.38665e-08	0.711488	0.751663	0.747724	-0.0362359	0.0312034	0.0316633	0.0205318	0
chr3:49755763-49757317*S_Shore	3	chr3:49755763-49757317	S_Shore	AMIGO3	5.44005e-10	7.15371e-08	4	4	cg08166588	49757438	8.93837e-11	5.18105e-08	0.65186	0.586696	0.562453	0.0894068	0.0364651	0.066517	0.0363393	0
chr3:49755763-49757317*S_Shore	3	chr3:49755763-49757317	S_Shore	RNF123	5.44005e-10	7.15371e-08	4	4	cg08166588	49757438	8.93837e-11	5.18105e-08	0.65186	0.586696	0.562453	0.0894068	0.0364651	0.066517	0.0363393	0
chr1:160370112-160370658*S_Shore	1	chr1:160370112-160370658	S_Shore	VANGL2	5.59344e-10	7.32808e-08	5	5	cg17024258	160370982	9.16559e-10	3.72997e-07	0.236107	0.13371	0.130358	0.105749	0.0376055	0.0287375	0.0220717	0
chr1:6525996-6526228*N_Shore	1	chr1:6525996-6526228	N_Shore	TNFRSF25	5.74568e-10	7.51077e-08	3	3	cg00087884	6525551	7.84605e-10	3.28399e-07	0.176667	0.224433	0.22038	-0.043713	0.017878	0.023159	0.0222161	0
chr17:18161711-18162316*Island	17	chr17:18161711-18162316	Island	FLII	6.22759e-10	8.0689e-08	9	9	cg18804206	18162315	4.46886e-11	2.87395e-08	0.310244	0.240088	0.259279	0.0509642	0.0296756	0.0422457	0.0245232	0
chr7:2727682-2728392*S_Shore	7	chr7:2727682-2728392	S_Shore	AMZ1	6.49153e-10	8.34647e-08	3	3	cg01439383	2728776	4.46478e-10	2.06494e-07	0.123375	0.231254	0.202251	-0.0788763	0.0268188	0.0466658	0.023638	0
chr9:139377110-139379174*Island	9	chr9:139377110-139379174	Island	C9orf163	6.58247e-10	8.34647e-08	9	9	cg09642020	139379173	2.04281e-11	1.48746e-08	0.519357	0.43035	0.451976	0.0673808	0.0343703	0.0405125	0.031661	0
chr9:140352818-140354044*Island	9	chr9:140352818-140354044	Island	NELF	6.6082e-10	8.34647e-08	5	5	cg07571038	140352910	1.80381e-11	1.33551e-08	0.764848	0.660009	0.654982	0.109865	0.0333649	0.0397012	0.039921	0
chr16:68269010-68272143*Island	16	chr16:68269010-68272143	Island	ESRP2	6.70698e-10	8.37594e-08	14	14	cg16562724	68270631	5.69574e-11	3.55905e-08	0.155141	0.191773	0.182683	-0.0275426	0.0258336	0.0266343	0.0180637	0
chr2:37898142-37899830*N_Shore	2	chr2:37898142-37899830	N_Shore	CDC42EP3	6.7733e-10	8.42009e-08	3	3	cg08215788	37898101	2.95569e-11	2.03563e-08	0.161922	0.0728149	0.0787438	0.0831778	0.035972	0.014051	0.017834	0
chr19:49199964-49200184*N_Shore	19	chr19:49199964-49200184	N_Shore	FUT2	6.78534e-10	8.42009e-08	6	6	cg04660111	49199234	1.78866e-10	9.38039e-08	0.262485	0.341766	0.332123	-0.0696375	0.0290325	0.039041	0.0274961	0
chr16:57496476-57497038*N_Shore	16	chr16:57496476-57497038	N_Shore	POLR2C	7.03864e-10	8.70987e-08	5	4	cg04976151	57496328	3.53026e-06	0.000371385	0.366749	0.273761	0.317309	0.0494399	0.0406399	0.0475759	0.0313059	0
chr5:133449320-133451260*S_Shore	5	chr5:133449320-133451260	S_Shore	TCF7	7.07316e-10	8.72197e-08	5	5	cg15413523	133451625	1.23835e-11	1.01024e-08	0.473378	0.390865	0.375484	0.0978942	0.0363233	0.0423291	0.03464	0
chr2:241937716-241938468*N_Shore	2	chr2:241937716-241938468	N_Shore	SNED1	7.23851e-10	8.90716e-08	3	3	cg21304158	241937034	1.33884e-09	5.13982e-07	0.451028	0.397126	0.417161	0.0338669	0.0305219	0.03584	0.0282522	0
chr1:154377670-154378445*N_Shore	1	chr1:154377670-154378445	N_Shore	IL6R	7.31843e-10	8.96792e-08	8	6	cg06980173	154376344	1.64192e-11	1.25013e-08	0.240888	0.282919	0.305532	-0.0646448	0.038697	0.0301569	0.0321563	0
chr1:32826944-32828017*Island	1	chr1:32826944-32828017	Island	LOC100128071	7.54599e-10	9.17659e-08	11	11	cg16379513	32827150	1.66393e-07	2.95269e-05	0.79412	0.853784	0.850437	-0.0563171	0.0340153	0.0499879	0.023802	0
chr1:32826944-32828017*Island	1	chr1:32826944-32828017	Island	TSSK3	7.54599e-10	9.17659e-08	11	11	cg16379513	32827150	1.66393e-07	2.95269e-05	0.79412	0.853784	0.850437	-0.0563171	0.0340153	0.0499879	0.023802	0
chr1:27683277-27683590*Island	1	chr1:27683277-27683590	Island	MAP3K6	7.73368e-10	9.37894e-08	4	4	cg09230763	27683351	3.22051e-10	1.55904e-07	0.834688	0.735888	0.711985	0.122703	0.0626807	0.0592821	0.0458222	0
chr2:217497811-217498847*S_Shore	2	chr2:217497811-217498847	S_Shore	IGFBP2	8.08613e-10	9.77274e-08	5	5	cg23059946	217500594	5.0526e-11	3.17972e-08	0.720352	0.571702	0.583748	0.136604	0.0470636	0.0722098	0.0464141	0
chr8:30241416-30242878*N_Shore	8	chr8:30241416-30242878	N_Shore	RBPMS	8.45554e-10	1.01843e-07	5	5	cg26122129	30241119	3.1951e-11	2.18221e-08	0.659599	0.510268	0.557159	0.10244	0.0424111	0.046137	0.0332994	0
chr1:155292469-155295433*N_Shore	1	chr1:155292469-155295433	N_Shore	RUSC1	8.66755e-10	1.04112e-07	5	4	cg26876647	155291345	6.08786e-08	1.27103e-05	0.807607	0.719308	0.723814	0.0837934	0.0277288	0.0517836	0.0411917	0
chr1:155292469-155295433*N_Shore	1	chr1:155292469-155295433	N_Shore	C1orf104	8.66755e-10	1.04112e-07	5	4	cg26876647	155291345	6.08786e-08	1.27103e-05	0.807607	0.719308	0.723814	0.0837934	0.0277288	0.0517836	0.0411917	0
chr7:35076136-35077808*S_Shore	7	chr7:35076136-35077808	S_Shore	DPY19L1	8.98906e-10	1.0768e-07	4	4	cg24927974	35078269	1.062e-09	4.20531e-07	0.622742	0.49987	0.548048	0.0746941	0.0386873	0.0649806	0.0429262	0
chr2:73297630-73299155*Island	2	chr2:73297630-73299155	Island	SFXN5	9.3501e-10	1.10651e-07	11	11	cg23396786	73299151	1.5256e-11	1.19843e-08	0.300376	0.208437	0.193077	0.107299	0.0446578	0.0465568	0.0230524	0
chr13:92051153-92051716*Island	13	chr13:92051153-92051716	Island	GPC5	9.40004e-10	1.10944e-07	4	4	cg26960333	92051705	4.51806e-11	2.89502e-08	0.359511	0.207787	0.210993	0.148518	0.0523336	0.0549813	0.048684	0
chr10:120966127-120967623*S_Shore	10	chr10:120966127-120967623	S_Shore	GRK5	9.62e-10	1.13236e-07	4	4	cg14351425	120968739	1.14402e-08	3.10137e-06	0.279816	0.151806	0.145007	0.134809	0.0538172	0.0575801	0.0367385	0
chr17:80898985-80899313*N_Shore	17	chr17:80898985-80899313	N_Shore	TBCD	9.81085e-10	1.14945e-07	7	7	cg13626654	80898525	1.11151e-10	6.17856e-08	0.524677	0.470877	0.491031	0.0336461	0.0362533	0.0360543	0.0291155	0
chr12:22486835-22488666*N_Shore	12	chr12:22486835-22488666	N_Shore	ST8SIA1	1.00415e-09	1.17414e-07	3	3	cg25600766	22486484	1.01632e-10	5.79986e-08	0.202149	0.117354	0.118686	0.0834623	0.0310982	0.0366281	0.0308207	0
chr19:2424005-2427983*Island	19	chr19:2424005-2427983	Island	TMPRSS9	1.01924e-09	1.17536e-07	14	11	cg19497523	2425476	3.10683e-10	1.50815e-07	0.895858	0.762092	0.759946	0.135912	0.0358761	0.0745687	0.0542607	0
chr19:940723-942490*Island	19	chr19:940723-942490	Island	ARID3A	1.02149e-09	1.17536e-07	7	6	cg01950129	941919	2.40461e-08	5.85539e-06	0.672548	0.622781	0.629158	0.0433905	0.0229994	0.0543378	0.0319373	0
chr11:46402624-46404139*N_Shore	11	chr11:46402624-46404139	N_Shore	MDK	1.02254e-09	1.17536e-07	9	9	cg07052627	46401447	6.44811e-11	3.97283e-08	0.661582	0.605046	0.617333	0.0442494	0.0288465	0.0300517	0.0288543	0
chr11:46402624-46404139*N_Shore	11	chr11:46402624-46404139	N_Shore	DGKZ	1.02254e-09	1.17536e-07	9	9	cg07052627	46401447	6.44811e-11	3.97283e-08	0.661582	0.605046	0.617333	0.0442494	0.0288465	0.0300517	0.0288543	0
chr1:110610265-110613303*S_Shore	1	chr1:110610265-110613303	S_Shore	ALX3	1.03812e-09	1.18939e-07	6	5	cg16893614	110614450	8.04163e-09	2.32299e-06	0.77232	0.866	0.849385	-0.0770646	0.044234	0.027216	0.0228947	0
chr20:61870781-61871178*N_Shelf	20	chr20:61870781-61871178	N_Shelf	BIRC7	1.09405e-09	1.23897e-07	10	10	cg15721145	61867205	6.82038e-11	4.14423e-08	0.520501	0.393636	0.42511	0.0953907	0.0362063	0.112848	0.0304807	0
chr6:32046815-32047094*S_Shore	6	chr6:32046815-32047094	S_Shore	TNXB	1.10327e-09	1.24302e-07	10	8	cg01188191	32047349	2.47876e-08	5.99979e-06	0.216207	0.27396	0.271323	-0.055116	0.0203663	0.0230132	0.01911	0
chr1:24648202-24648985*Island	1	chr1:24648202-24648985	Island	GRHL3	1.19627e-09	1.34351e-07	5	5	cg06376426	24648203	1.33971e-10	7.30871e-08	0.263424	0.344044	0.321312	-0.0578879	0.0235439	0.0399591	0.0294429	0
chr16:3070095-3071305*N_Shore	16	chr16:3070095-3071305	N_Shore	CLDN6	1.234e-09	1.37885e-07	8	8	cg20035459	3068707	1.9958e-10	1.04029e-07	0.600182	0.52576	0.493322	0.106859	0.0399912	0.0513878	0.0486956	0
chr16:4015001-4015232*N_Shore	16	chr16:4015001-4015232	N_Shore	ADCY9	1.2827e-09	1.42783e-07	6	6	cg08550394	4013659	7.22805e-09	2.14061e-06	0.377089	0.501506	0.476655	-0.0995656	0.0393833	0.0600357	0.0302572	0
chr6:31939730-31940559*S_Shore	6	chr6:31939730-31940559	S_Shore	STK19	1.47131e-09	1.62642e-07	12	11	cg19203836	31940801	1.21726e-07	2.26498e-05	0.308691	0.234537	0.256091	0.0525996	0.0381992	0.0420927	0.0243306	0
chr6:31939730-31940559*S_Shore	6	chr6:31939730-31940559	S_Shore	DOM3Z	1.47131e-09	1.62642e-07	12	11	cg19203836	31940801	1.21726e-07	2.26498e-05	0.308691	0.234537	0.256091	0.0525996	0.0381992	0.0420927	0.0243306	0
chr4:78783745-78784015*N_Shore	4	chr4:78783745-78784015	N_Shore	MRPL1	1.47439e-09	1.62642e-07	3	3	cg01930676	78783082	8.42949e-10	3.49499e-07	0.307612	0.388615	0.38734	-0.0797274	0.040366	0.0461207	0.0336847	0
chr17:40558005-40558274*Island	17	chr17:40558005-40558274	Island	PTRF	1.47679e-09	1.62642e-07	3	3	cg27576485	40558063	1.52069e-09	5.71346e-07	0.640943	0.488297	0.501827	0.139116	0.0699472	0.0827014	0.0875758	0
chr17:79259282-79259537*N_Shore	17	chr17:79259282-79259537	N_Shore	SLC38A10	1.49492e-09	1.64227e-07	4	4	cg25692139	79258813	2.29358e-09	8.14828e-07	0.229766	0.302728	0.327067	-0.0973013	0.0344166	0.0523006	0.0340871	0
chr10:465928-466396*S_Shelf	10	chr10:465928-466396	S_Shelf	DIP2C	1.50799e-09	1.65252e-07	4	4	cg24461627	468412	4.61421e-11	2.93529e-08	0.479124	0.575496	0.563255	-0.0841312	0.0327877	0.0350079	0.0341963	0
chr12:125003217-125003482*Island	12	chr12:125003217-125003482	Island	NCOR2	1.51347e-09	1.6544e-07	4	4	cg11639950	125003407	1.12092e-10	6.2113e-08	0.66734	0.550817	0.585934	0.081406	0.0353754	0.0450408	0.0402329	0
chr19:11485286-11485769*N_Shore	19	chr19:11485286-11485769	N_Shore	C19orf39	1.54854e-09	1.68751e-07	5	5	cg03045323	11484448	2.57981e-10	1.29513e-07	0.150621	0.101361	0.108775	0.0418463	0.0296715	0.0194172	0.0209654	0
chr12:6664425-6665336*S_Shore	12	chr12:6664425-6665336	S_Shore	IFFO1	1.58069e-09	1.71723e-07	5	5	cg01493517	6665447	5.20133e-07	7.66972e-05	0.169743	0.121472	0.133998	0.0357452	0.0250174	0.021309	0.025487	0
chr2:1895697-1895932*N_Shore	2	chr2:1895697-1895932	N_Shore	MYT1L	1.65821e-09	1.79813e-07	3	3	cg10215032	1895407	3.25125e-10	1.56532e-07	0.281413	0.209679	0.218634	0.0627784	0.0339199	0.0418891	0.0240279	0
chr11:67275067-67276431*N_Shore	11	chr11:67275067-67276431	N_Shore	PITPNM1	1.73013e-09	1.8635e-07	4	4	cg01972009	67273431	7.92168e-10	3.29997e-07	0.266561	0.224954	0.222166	0.0443952	0.0240538	0.02426	0.018888	0
chr7:150644455-150644767*Island	7	chr7:150644455-150644767	Island	KCNH2	1.77796e-09	1.91034e-07	4	4	cg11857646	150644631	2.43429e-10	1.22908e-07	0.375734	0.477911	0.470232	-0.0944978	0.0352018	0.0590354	0.0249406	0
chr12:133067072-133067735*Island	12	chr12:133067072-133067735	Island	FBRSL1	1.79265e-09	1.92012e-07	4	4	cg15515537	133067734	2.31065e-09	8.17973e-07	0.0808866	0.0559365	0.05797	0.0229165	0.0145045	0.010887	0.00918217	0
chr9:131154346-131155923*Island	9	chr9:131154346-131155923	Island	MIR219-2	1.79578e-09	1.92012e-07	5	4	cg20413392	131155013	7.18107e-11	4.2969e-08	0.641661	0.782494	0.773334	-0.131673	0.0577399	0.0452096	0.0285369	0
chr8:21914275-21914525*S_Shelf	8	chr8:21914275-21914525	S_Shelf	EPB49	1.83669e-09	1.95674e-07	6	6	cg16678564	21916802	5.78651e-07	8.40599e-05	0.832439	0.790137	0.795673	0.0367662	0.022604	0.0372589	0.0285837	0
chr19:5822284-5822532*Island	19	chr19:5822284-5822532	Island	NRTN	1.87122e-09	1.98513e-07	3	3	cg24035928	5822514	2.87556e-10	1.41592e-07	0.703053	0.590702	0.620018	0.0830354	0.0424703	0.0786919	0.0407657	0
chr10:105217966-105218287*S_Shore	10	chr10:105217966-105218287	S_Shore	CALHM1	1.87461e-09	1.98513e-07	7	7	cg26955383	105218660	2.98818e-10	1.46264e-07	0.132537	0.197537	0.191413	-0.0588758	0.0215811	0.0233967	0.0240422	0
chr15:74218696-74220373*Island	15	chr15:74218696-74220373	Island	LOXL1	2.04545e-09	2.14542e-07	16	16	cg00028013	74218697	1.08837e-10	6.08832e-08	0.404054	0.466728	0.507651	-0.103597	0.0491399	0.0644976	0.0379798	0
chr1:211500151-211500636*N_Shore	1	chr1:211500151-211500636	N_Shore	TRAF5	2.2476e-09	2.35045e-07	6	5	cg27433482	211498962	3.31592e-11	2.25029e-08	0.577225	0.663048	0.653915	-0.0766901	0.0327436	0.0425956	0.0342459	0
chr1:2409757-2410049*Island	1	chr1:2409757-2410049	Island	PLCH2	2.32766e-09	2.42985e-07	3	3	cg23911852	2409853	3.71773e-11	2.4628e-08	0.828927	0.696707	0.707659	0.121268	0.0446882	0.0445455	0.0483131	0
chr10:127462230-127462987*S_Shore	10	chr10:127462230-127462987	S_Shore	MMP21	2.3425e-09	2.43668e-07	6	6	cg25319933	127464557	2.94981e-07	4.81733e-05	0.671019	0.611038	0.606567	0.0644525	0.0416824	0.0502282	0.0494497	0
chr16:1591813-1592107*S_Shore	16	chr16:1591813-1592107	S_Shore	IFT140	2.36119e-09	2.44602e-07	7	7	cg09924669	1593214	6.27624e-08	1.29866e-05	0.249478	0.284877	0.30826	-0.0587827	0.0313987	0.029764	0.0319822	0
chr16:1591813-1592107*S_Shore	16	chr16:1591813-1592107	S_Shore	TMEM204	2.36119e-09	2.44602e-07	7	7	cg09924669	1593214	6.27624e-08	1.29866e-05	0.249478	0.284877	0.30826	-0.0587827	0.0313987	0.029764	0.0319822	0
chr6:42419510-42419743*N_Shore	6	chr6:42419510-42419743	N_Shore	TRERF1	2.3922e-09	2.47088e-07	5	5	cg27370104	42417938	8.90789e-11	5.18042e-08	0.433836	0.370684	0.373351	0.0604857	0.0395994	0.0316774	0.0212593	0
chr1:161171809-161172256*N_Shelf	1	chr1:161171809-161172256	N_Shelf	NDUFS2	2.43335e-09	2.50165e-07	9	8	cg17904988	161168451	9.58178e-10	3.89036e-07	0.26975	0.241739	0.260328	0.00942221	0.0358241	0.042112	0.0501683	0
chr1:161171809-161172256*N_Shelf	1	chr1:161171809-161172256	N_Shelf	ADAMTS4	2.43335e-09	2.50165e-07	9	8	cg17904988	161168451	9.58178e-10	3.89036e-07	0.26975	0.241739	0.260328	0.00942221	0.0358241	0.042112	0.0501683	0
chr11:64621207-64622246*Island	11	chr11:64621207-64622246	Island	EHD1	2.45883e-09	2.5205e-07	6	5	cg13671299	64621685	9.9198e-10	3.99082e-07	0.33802	0.386187	0.392285	-0.0542652	0.0361982	0.0343263	0.0316005	0
chr6:41908745-41909711*S_Shore	6	chr6:41908745-41909711	S_Shore	CCND3	2.50112e-09	2.55196e-07	3	3	cg09903090	41910019	8.58078e-10	3.52539e-07	0.10418	0.0590962	0.06952	0.03466	0.0170441	0.0158678	0.0137573	0
chr10:678262-679515*N_Shelf	10	chr10:678262-679515	N_Shelf	DIP2C	2.53737e-09	2.58043e-07	3	3	cg15346619	675907	4.11215e-11	2.675e-08	0.520786	0.627875	0.617279	-0.0964931	0.0345919	0.0569011	0.032227	0
chr2:97481356-97483276*Island	2	chr2:97481356-97483276	Island	CNNM3	2.55873e-09	2.58043e-07	8	8	cg00673006	97483133	4.11932e-11	2.675e-08	0.331041	0.24959	0.255007	0.0760343	0.0271452	0.0286297	0.0214022	0
chr20:62193966-62198985*Island	20	chr20:62193966-62198985	Island	PRIC285	2.56123e-09	2.58043e-07	11	11	cg23352030	62198469	8.68678e-11	5.0854e-08	0.699564	0.602416	0.617775	0.0817891	0.0403627	0.0620696	0.0467193	0
chr18:77153292-77160759*Island	18	chr18:77153292-77160759	Island	NFATC1	2.65306e-09	2.64273e-07	22	20	cg01277438	77158471	1.25902e-07	2.32795e-05	0.420443	0.363459	0.377159	0.0432844	0.0317033	0.0414326	0.0295239	0
chr17:78079568-78079833*Island	17	chr17:78079568-78079833	Island	GAA	2.68567e-09	2.66767e-07	5	5	cg21238619	78079768	1.23492e-07	2.2906e-05	0.523249	0.453033	0.468767	0.054482	0.0446614	0.0430887	0.0349049	0
chr3:99979678-99980038*N_Shore	3	chr3:99979678-99980038	N_Shore	TBC1D23	2.73307e-09	2.69501e-07	10	10	cg04730047	99979355	3.24957e-10	1.56532e-07	0.239459	0.197204	0.219938	0.019521	0.0448634	0.0473926	0.047279	0
chr6:31619856-31620525*S_Shore	6	chr6:31619856-31620525	S_Shore	BAT3	2.77778e-09	2.71028e-07	13	13	cg14756795	31621299	1.79435e-08	4.52337e-06	0.339344	0.287824	0.298857	0.0404861	0.0257197	0.047014	0.0268498	0
chr6:31695894-31698245*Island	6	chr6:31695894-31698245	Island	DDAH2	2.91639e-09	2.75845e-07	62	57	cg16704889	31696729	3.77334e-10	1.7922e-07	0.709202	0.599088	0.605515	0.103687	0.0445027	0.0552761	0.0418468	0
chr5:1494853-1495287*Island	5	chr5:1494853-1495287	Island	LPCAT1	3.00567e-09	2.83681e-07	4	4	cg09849319	1494983	1.90005e-09	6.95222e-07	0.33401	0.415384	0.429796	-0.0957859	0.0406427	0.0379313	0.0306742	0
chr19:2250560-2253959*N_Shore	19	chr19:2250560-2253959	N_Shore	AMH	3.0145e-09	2.83906e-07	4	4	cg22296149	2249330	6.27213e-10	2.72894e-07	0.55369	0.495173	0.509778	0.043912	0.0260703	0.033965	0.0264425	0
chr17:38219084-38219880*S_Shore	17	chr17:38219084-38219880	S_Shore	THRA	3.22712e-09	3.03444e-07	3	3	cg11826961	38221639	2.7654e-10	1.37654e-07	0.542715	0.450252	0.484242	0.0584737	0.0334416	0.0467387	0.0418753	0
chr19:13106817-13107688*N_Shore	19	chr19:13106817-13107688	N_Shore	NFIX	3.3298e-09	3.12432e-07	4	4	cg03172991	13105728	5.34632e-11	3.3526e-08	0.513558	0.451649	0.474968	0.0385895	0.025688	0.0378128	0.0277356	0
chr15:91445563-91446768*S_Shore	15	chr15:91445563-91446768	S_Shore	MAN2A2	3.38141e-09	3.16432e-07	5	5	cg05131526	91447195	6.30028e-10	2.73443e-07	0.61495	0.490057	0.521125	0.0938247	0.0423147	0.0531384	0.0333385	0
chr19:13106817-13107688*Island	19	chr19:13106817-13107688	Island	NFIX	3.42887e-09	3.20193e-07	4	4	cg02000253	13107687	4.19207e-09	1.36039e-06	0.670856	0.603004	0.61992	0.0509359	0.0328896	0.0474766	0.0377096	0
chr17:40718686-40719633*Island	17	chr17:40718686-40719633	Island	MLX	3.45567e-09	3.20825e-07	12	11	cg20795913	40718830	1.05048e-09	4.17847e-07	0.693908	0.653691	0.629589	0.0643188	0.030438	0.0397762	0.0238212	0
chr17:37823693-37824989*N_Shelf	17	chr17:37823693-37824989	N_Shelf	TCAP	3.54926e-09	3.2796e-07	9	9	cg10986043	37820495	1.68132e-10	8.89693e-08	0.561616	0.452441	0.486945	0.0746716	0.0446052	0.0496159	0.0394113	0
chr19:10443688-10446022*Island	19	chr19:10443688-10446022	Island	ICAM3	3.63046e-09	3.33018e-07	10	10	cg07976603	10444506	7.52417e-10	3.18712e-07	0.37013	0.262917	0.260625	0.109506	0.0432507	0.0611732	0.0380106	0
chr19:10443688-10446022*Island	19	chr19:10443688-10446022	Island	RAVER1	3.63046e-09	3.33018e-07	10	10	cg07976603	10444506	7.52417e-10	3.18712e-07	0.37013	0.262917	0.260625	0.109506	0.0432507	0.0611732	0.0380106	0
chr1:22149683-22149897*Island	1	chr1:22149683-22149897	Island	LDLRAD2	3.72661e-09	3.41127e-07	4	4	cg12939901	22149896	6.96726e-09	2.07734e-06	0.502504	0.422218	0.421701	0.0808032	0.0421061	0.0422483	0.0325501	0
chr1:22149683-22149897*Island	1	chr1:22149683-22149897	Island	HSPG2	3.72661e-09	3.41127e-07	4	4	cg12939901	22149896	6.96726e-09	2.07734e-06	0.502504	0.422218	0.421701	0.0808032	0.0421061	0.0422483	0.0325501	0
chr2:114048828-114049055*Island	2	chr2:114048828-114049055	Island	LOC440839	4.11728e-09	3.75912e-07	5	5	cg14301024	114048932	1.95529e-09	7.09054e-07	0.393552	0.304482	0.304819	0.0887322	0.0516003	0.0522303	0.0484994	0
chr17:74010977-74011255*Island	17	chr17:74010977-74011255	Island	EVPL	4.12568e-09	3.76095e-07	3	3	cg12034783	74011109	2.90857e-09	9.91339e-07	0.791258	0.676008	0.669421	0.121837	0.0410895	0.0488736	0.0556722	0
chr17:1492086-1492322*Island	17	chr17:1492086-1492322	Island	SLC43A2	4.21258e-09	3.83223e-07	4	4	cg07943111	1492285	2.17272e-08	5.36214e-06	0.483304	0.530159	0.543869	-0.0605654	0.030102	0.0619167	0.0280963	0
chr13:52979999-52980586*S_Shore	13	chr13:52979999-52980586	S_Shore	THSD1	4.2254e-09	3.83795e-07	3	3	cg26493224	52980671	3.52913e-10	1.68987e-07	0.342755	0.42123	0.426715	-0.0839598	0.0313265	0.0545229	0.0318296	0
chr6:41528266-41528900*S_Shore	6	chr6:41528266-41528900	S_Shore	FOXP4	4.25431e-09	3.85824e-07	3	3	cg18885162	41529269	2.50248e-10	1.2599e-07	0.695063	0.748239	0.756707	-0.061644	0.0216538	0.0328286	0.0233214	0
chr1:954768-956343*S_Shore	1	chr1:954768-956343	S_Shore	AGRN	4.43135e-09	4.01261e-07	3	3	cg24704476	956799	9.53059e-08	1.83943e-05	0.734751	0.680771	0.677059	0.0576912	0.0348538	0.041516	0.0324865	0
chr7:1885033-1885402*N_Shore	7	chr7:1885033-1885402	N_Shore	MAD1L1	4.5485e-09	4.09395e-07	8	7	cg12366968	1883876	5.6764e-08	1.1979e-05	0.327962	0.437261	0.419563	-0.0916017	0.0440907	0.0378573	0.0355351	0
chr11:66083572-66083782*S_Shore	11	chr11:66083572-66083782	S_Shore	CD248	4.54907e-09	4.09395e-07	6	5	cg00350296	66084841	3.66975e-09	1.21096e-06	0.355682	0.300693	0.290269	0.0654131	0.0388334	0.0379024	0.0357415	0
chr1:41157162-41157975*N_Shore	1	chr1:41157162-41157975	N_Shore	LOC100130557	4.67524e-09	4.19465e-07	6	6	cg15986668	41156730	1.01705e-10	5.79986e-08	0.621495	0.501134	0.510894	0.110601	0.0401902	0.0616498	0.0429764	0
chr1:41157162-41157975*N_Shore	1	chr1:41157162-41157975	N_Shore	NFYC	4.67524e-09	4.19465e-07	6	6	cg15986668	41156730	1.01705e-10	5.79986e-08	0.621495	0.501134	0.510894	0.110601	0.0401902	0.0616498	0.0429764	0
chr11:129993524-129993797*N_Shore	11	chr11:129993524-129993797	N_Shore	APLP2	4.73877e-09	4.24085e-07	5	5	cg04469731	129992359	2.93256e-09	9.97584e-07	0.475519	0.3917	0.385784	0.089735	0.0325959	0.0359733	0.0338951	0
chr11:60718428-60718888*Island	11	chr11:60718428-60718888	Island	SLC15A3	4.76592e-09	4.25866e-07	3	3	cg14130459	60718568	1.0251e-10	5.82644e-08	0.435728	0.583478	0.554122	-0.118395	0.0693858	0.0714119	0.0590904	0
chr3:128205495-128212274*N_Shore	3	chr3:128205495-128212274	N_Shore	GATA2	4.78773e-09	4.26086e-07	8	8	cg06115614	128205143	3.46219e-09	1.14676e-06	0.38138	0.301271	0.322217	0.0591629	0.0360633	0.0311155	0.025389	0
chr19:35769543-35770197*S_Shelf	19	chr19:35769543-35770197	S_Shelf	HAMP	4.80567e-09	4.26176e-07	8	7	cg27273033	35773718	1.14141e-09	4.44977e-07	0.562773	0.519702	0.531467	0.031306	0.0300891	0.0395682	0.0219591	0
chr10:99473520-99474664*S_Shelf	10	chr10:99473520-99474664	S_Shelf	LOC100270710	4.8605e-09	4.29957e-07	5	5	cg10163377	99478368	1.90846e-08	4.78512e-06	0.413035	0.355688	0.370792	0.0422431	0.0409428	0.0484678	0.0377612	0
chr20:61915934-61916290*Island	20	chr20:61915934-61916290	Island	ARFGAP1	4.99392e-09	4.38759e-07	3	3	cg26280578	61916036	1.57889e-10	8.43084e-08	0.748251	0.836897	0.84374	-0.0954891	0.0378447	0.068653	0.0409701	0
chr7:150777607-150780879*Island	7	chr7:150777607-150780879	Island	TMUB1	5.03969e-09	4.38759e-07	33	29	cg14323210	150778255	4.90184e-10	2.24353e-07	0.322505	0.219556	0.243836	0.0786693	0.0367678	0.0396777	0.0313268	0
chr7:150777607-150780879*Island	7	chr7:150777607-150780879	Island	FASTK	5.03969e-09	4.38759e-07	33	29	cg14323210	150778255	4.90184e-10	2.24353e-07	0.322505	0.219556	0.243836	0.0786693	0.0367678	0.0396777	0.0313268	0
chr1:119529819-119530712*S_Shore	1	chr1:119529819-119530712	S_Shore	TBX15	5.11404e-09	4.44354e-07	4	4	cg12664119	119532352	1.43789e-09	5.43716e-07	0.250241	0.301021	0.298917	-0.0486759	0.019138	0.0332544	0.0209097	0
chr12:58119909-58121551*Island	12	chr12:58119909-58121551	Island	LOC100130776	5.23027e-09	4.52668e-07	9	8	cg11511175	58119979	1.96028e-10	1.025e-07	0.827183	0.739719	0.726983	0.100199	0.0252011	0.0950779	0.0357113	0
chr12:58119909-58121551*Island	12	chr12:58119909-58121551	Island	AGAP2	5.23027e-09	4.52668e-07	9	8	cg11511175	58119979	1.96028e-10	1.025e-07	0.827183	0.739719	0.726983	0.100199	0.0252011	0.0950779	0.0357113	0
chr22:50963608-50970768*Island	22	chr22:50963608-50970768	Island	SCO2	5.34244e-09	4.56103e-07	29	28	cg10416593	50966123	1.63093e-08	4.15901e-06	0.619685	0.516908	0.531327	0.0883586	0.0423626	0.0558719	0.0614534	0
chr22:50963608-50970768*Island	22	chr22:50963608-50970768	Island	TYMP	5.34244e-09	4.56103e-07	29	28	cg10416593	50966123	1.63093e-08	4.15901e-06	0.619685	0.516908	0.531327	0.0883586	0.0423626	0.0558719	0.0614534	0
chr8:145577098-145578142*Island	8	chr8:145577098-145578142	Island	C8ORFK29	5.54113e-09	4.71695e-07	6	6	cg25862768	145578141	2.22792e-10	1.13793e-07	0.332339	0.230934	0.198561	0.133778	0.0533738	0.0387371	0.0331124	0
chr6:33175561-33176387*N_Shore	6	chr6:33175561-33176387	N_Shore	MIR219-1	5.61073e-09	4.75323e-07	10	10	cg01910419	33174761	4.13665e-08	9.24858e-06	0.799451	0.736341	0.734455	0.0649961	0.034877	0.039731	0.0333109	0
chr7:157560974-157561195*S_Shore	7	chr7:157560974-157561195	S_Shore	PTPRN2	5.90121e-09	4.98733e-07	6	5	cg16937735	157562675	2.69591e-10	1.34575e-07	0.402797	0.498294	0.499648	-0.096851	0.0295801	0.0562771	0.0327185	0
chr1:247494249-247495840*S_Shore	1	chr1:247494249-247495840	S_Shore	ZNF496	6.09067e-09	5.14006e-07	3	3	cg13911707	247496404	5.01901e-10	2.29121e-07	0.655312	0.52249	0.544559	0.110753	0.051447	0.0710295	0.0458271	0
chr12:66217627-66220181*S_Shore	12	chr12:66217627-66220181	S_Shore	HMGA2	6.56788e-09	5.51374e-07	3	3	cg20688651	66220754	1.26178e-08	3.33341e-06	0.329168	0.231687	0.262124	0.0670433	0.0372519	0.0463857	0.0412067	0
chr12:66217627-66220181*S_Shore	12	chr12:66217627-66220181	S_Shore	RPSAP52	6.56788e-09	5.51374e-07	3	3	cg20688651	66220754	1.26178e-08	3.33341e-06	0.329168	0.231687	0.262124	0.0670433	0.0372519	0.0463857	0.0412067	0
chr11:57424937-57425262*N_Shore	11	chr11:57424937-57425262	N_Shore	CLP1	7.02942e-09	5.86487e-07	8	8	cg06551161	57424534	8.12912e-10	3.3784e-07	0.518635	0.41987	0.442566	0.0760698	0.0415755	0.0480322	0.0443538	0
chr12:54454249-54454458*N_Shelf	12	chr12:54454249-54454458	N_Shelf	FLJ12825	7.16209e-09	5.95727e-07	6	6	cg23197405	54451938	1.41578e-09	5.38826e-07	0.607931	0.529664	0.511857	0.0960739	0.0476357	0.0607717	0.0514326	0
chr3:47017879-47018312*S_Shore	3	chr3:47017879-47018312	S_Shore	CCDC12	7.17735e-09	5.95727e-07	5	5	cg00906812	47018657	7.60449e-10	3.20573e-07	0.2821	0.220648	0.238631	0.0434689	0.0301438	0.0252215	0.0239895	0
chr17:62774366-62777797*Island	17	chr17:62774366-62777797	Island	LOC146880	7.34884e-09	6.05964e-07	16	14	cg14501219	62775713	1.71206e-09	6.39162e-07	0.58249	0.468565	0.471034	0.111455	0.0543881	0.0476432	0.0414393	0
chr4:47838604-47839946*S_Shore	4	chr4:47838604-47839946	S_Shore	CORIN	7.53495e-09	6.19282e-07	7	7	cg26018901	47840011	9.61132e-10	3.89338e-07	0.138549	0.172463	0.163145	-0.0245958	0.0260061	0.0322485	0.0204522	0
chr10:530713-531099*S_Shore	10	chr10:530713-531099	S_Shore	DIP2C	7.72623e-09	6.31469e-07	12	12	cg14429526	531562	5.46666e-06	0.000533381	0.313709	0.360176	0.397442	-0.0837322	0.0394093	0.068336	0.0422628	0
chr13:49794125-49795542*N_Shore	13	chr13:49794125-49795542	N_Shore	MLNR	7.97219e-09	6.49163e-07	5	5	cg05077231	49793054	5.38388e-10	2.43256e-07	0.537966	0.62644	0.635116	-0.0971498	0.0317694	0.040371	0.0332972	0
chr6:33167885-33168715*N_Shore	6	chr6:33167885-33168715	N_Shore	SLC39A7	8.24162e-09	6.67094e-07	15	13	cg17567838	33167488	2.3456e-07	3.96159e-05	0.463117	0.40996	0.427102	0.0360149	0.0259554	0.0427689	0.0232258	0
chr6:33167885-33168715*N_Shore	6	chr6:33167885-33168715	N_Shore	RXRB	8.24162e-09	6.67094e-07	15	13	cg17567838	33167488	2.3456e-07	3.96159e-05	0.463117	0.40996	0.427102	0.0360149	0.0259554	0.0427689	0.0232258	0
chr16:30204695-30206485*Island	16	chr16:30204695-30206485	Island	SULT1A3	8.30797e-09	6.71539e-07	3	3	cg19450025	30206073	2.65454e-10	1.32886e-07	0.169787	0.107229	0.114243	0.0555441	0.0239429	0.0207877	0.0172367	0
chr16:30204695-30206485*Island	16	chr16:30204695-30206485	Island	SULT1A4	8.30797e-09	6.71539e-07	3	3	cg19450025	30206073	2.65454e-10	1.32886e-07	0.169787	0.107229	0.114243	0.0555441	0.0239429	0.0207877	0.0172367	0
chr16:30204695-30206485*Island	16	chr16:30204695-30206485	Island	BOLA2B	8.30797e-09	6.71539e-07	3	3	cg19450025	30206073	2.65454e-10	1.32886e-07	0.169787	0.107229	0.114243	0.0555441	0.0239429	0.0207877	0.0172367	0
chr16:30204695-30206485*Island	16	chr16:30204695-30206485	Island	GIYD1	8.30797e-09	6.71539e-07	3	3	cg19450025	30206073	2.65454e-10	1.32886e-07	0.169787	0.107229	0.114243	0.0555441	0.0239429	0.0207877	0.0172367	0
chr16:30204695-30206485*Island	16	chr16:30204695-30206485	Island	BOLA2	8.30797e-09	6.71539e-07	3	3	cg19450025	30206073	2.65454e-10	1.32886e-07	0.169787	0.107229	0.114243	0.0555441	0.0239429	0.0207877	0.0172367	0
chr16:30204695-30206485*Island	16	chr16:30204695-30206485	Island	GIYD2	8.30797e-09	6.71539e-07	3	3	cg19450025	30206073	2.65454e-10	1.32886e-07	0.169787	0.107229	0.114243	0.0555441	0.0239429	0.0207877	0.0172367	0
chr6:31125894-31126561*N_Shore	6	chr6:31125894-31126561	N_Shore	TCF19	8.48858e-09	6.83317e-07	10	9	cg12044213	31124978	2.3674e-09	8.31874e-07	0.436577	0.362739	0.393233	0.0433446	0.0436063	0.0425323	0.0410577	0
chr6:31125894-31126561*N_Shore	6	chr6:31125894-31126561	N_Shore	CCHCR1	8.48858e-09	6.83317e-07	10	9	cg12044213	31124978	2.3674e-09	8.31874e-07	0.436577	0.362739	0.393233	0.0433446	0.0436063	0.0425323	0.0410577	0
chr17:72208474-72208902*N_Shore	17	chr17:72208474-72208902	N_Shore	TTYH2	8.51843e-09	6.83846e-07	6	6	cg23632849	72208322	1.88979e-09	6.93753e-07	0.545586	0.481555	0.507316	0.0382704	0.0253226	0.0418607	0.028404	0
chr17:72208474-72208902*N_Shore	17	chr17:72208474-72208902	N_Shore	MGC16275	8.51843e-09	6.83846e-07	6	6	cg23632849	72208322	1.88979e-09	6.93753e-07	0.545586	0.481555	0.507316	0.0382704	0.0253226	0.0418607	0.028404	0
chr11:72437676-72438005*S_Shore	11	chr11:72437676-72438005	S_Shore	ARAP1	8.61067e-09	6.90307e-07	3	3	cg12298445	72438603	2.44911e-09	8.54573e-07	0.561031	0.485429	0.516375	0.0446563	0.0349731	0.0334371	0.0344679	0
chr9:139922197-139923447*N_Shore	9	chr9:139922197-139923447	N_Shore	C9orf139	8.79234e-09	7.03591e-07	4	4	cg21120249	139921971	1.9614e-08	4.90242e-06	0.497273	0.515243	0.570204	-0.0729309	0.0398948	0.0545777	0.0415346	0
chr9:139922197-139923447*N_Shore	9	chr9:139922197-139923447	N_Shore	ABCA2	8.79234e-09	7.03591e-07	4	4	cg21120249	139921971	1.9614e-08	4.90242e-06	0.497273	0.515243	0.570204	-0.0729309	0.0398948	0.0545777	0.0415346	0
chr5:180622178-180622658*Island	5	chr5:180622178-180622658	Island	TRIM7	9.51021e-09	7.5902e-07	4	4	cg19566586	180622643	5.65218e-10	2.52074e-07	0.887058	0.834904	0.807115	0.0799426	0.0217729	0.0862011	0.036909	0
chr7:99698173-99699646*N_Shore	7	chr7:99698173-99699646	N_Shore	MCM7	9.52387e-09	7.5902e-07	4	4	cg07461273	99697172	2.84587e-10	1.40864e-07	0.591943	0.56606	0.529612	0.0623312	0.0365882	0.0345835	0.0309823	0
chr22:23522550-23524465*N_Shore	22	chr22:23522550-23524465	N_Shore	BCR	9.54962e-09	7.5902e-07	8	7	cg00281467	23522460	6.82349e-09	2.04834e-06	0.18215	0.102997	0.121398	0.0607518	0.0336559	0.0223501	0.023337	0
chr6:33048416-33048814*N_Shelf	6	chr6:33048416-33048814	N_Shelf	HLA-DPB1	9.5642e-09	7.59152e-07	3	3	cg00750366	33044510	7.69588e-09	2.25266e-06	0.340115	0.168075	0.213014	0.127101	0.0690617	0.0418551	0.0427908	0
chr20:62716288-62716533*Island	20	chr20:62716288-62716533	Island	OPRL1	9.7911e-09	7.76113e-07	3	3	cg04660147	62716443	2.90277e-09	9.91281e-07	0.653295	0.571194	0.581421	0.0718744	0.0311863	0.042341	0.0323531	0
chr20:62716288-62716533*Island	20	chr20:62716288-62716533	Island	C20orf201	9.7911e-09	7.76113e-07	3	3	cg04660147	62716443	2.90277e-09	9.91281e-07	0.653295	0.571194	0.581421	0.0718744	0.0311863	0.042341	0.0323531	0
chr1:17292904-17293115*S_Shore	1	chr1:17292904-17293115	S_Shore	CROCC	1.00197e-08	7.92807e-07	4	4	cg06911110	17293971	1.78208e-10	9.37378e-08	0.680187	0.519331	0.579465	0.100723	0.0409289	0.0648276	0.0567825	0
chr18:20714968-20717071*N_Shore	18	chr18:20714968-20717071	N_Shore	CABLES1	1.01592e-08	8.00964e-07	8	8	cg00455327	20714217	1.17895e-08	3.1572e-06	0.329951	0.251174	0.268519	0.0614318	0.0326057	0.0368397	0.0317095	0
chr7:2059907-2060131*Island	7	chr7:2059907-2060131	Island	MAD1L1	1.04749e-08	8.24749e-07	4	3	cg15896696	2059921	1.97297e-08	4.92434e-06	0.368625	0.307127	0.304541	0.0640843	0.059959	0.0470823	0.0476566	0
chr2:97527489-97527704*N_Shore	2	chr2:97527489-97527704	N_Shore	SEMA4C	1.05215e-08	8.26202e-07	6	6	cg11344744	97526122	7.7567e-10	3.26209e-07	0.480564	0.404953	0.422597	0.0579671	0.0389545	0.031944	0.0325185	0
chr19:49253688-49254221*N_Shelf	19	chr19:49253688-49254221	N_Shelf	IZUMO1	1.06179e-08	8.29592e-07	7	7	cg15146515	49250561	5.16588e-08	1.11373e-05	0.131478	0.0920504	0.087663	0.0438153	0.0249816	0.0197681	0.0194103	0
chr17:58498711-58499332*S_Shore	17	chr17:58498711-58499332	S_Shore	C17orf64	1.06353e-08	8.29592e-07	8	8	cg21122199	58499720	1.77661e-09	6.57685e-07	0.542226	0.470622	0.481267	0.0609588	0.0395997	0.0527705	0.0400295	0
chr12:124911243-124911464*N_Shelf	12	chr12:124911243-124911464	N_Shelf	NCOR2	1.09149e-08	8.48404e-07	8	8	cg00169184	124908920	1.07671e-08	2.95987e-06	0.659048	0.742065	0.739717	-0.0806693	0.0421938	0.0429399	0.0415524	0
chr1:204950982-204951210*S_Shelf	1	chr1:204950982-204951210	S_Shelf	NFASC	1.11123e-08	8.62225e-07	4	4	cg26601496	204955125	2.23665e-10	1.13908e-07	0.512211	0.582271	0.585247	-0.0730366	0.0293223	0.0337058	0.0288296	0
chr10:135191594-135193307*S_Shore	10	chr10:135191594-135193307	S_Shore	PAOX	1.13729e-08	8.80119e-07	6	6	cg27165835	135195081	2.2401e-07	3.82861e-05	0.560824	0.647758	0.656195	-0.0953708	0.0364233	0.0524667	0.0393981	0
chr7:71800757-71802768*N_Shore	7	chr7:71800757-71802768	N_Shore	CALN1	1.16408e-08	8.99271e-07	4	4	cg00277397	71800412	2.00689e-10	1.04029e-07	0.610939	0.668173	0.738354	-0.127415	0.0444978	0.0529888	0.0315871	0
chr8:101157647-101158215*Island	8	chr8:101157647-101158215	Island	FBXO43	1.17738e-08	9.08354e-07	3	3	cg23700125	101157661	9.86498e-09	2.77686e-06	0.24078	0.141483	0.162731	0.0780497	0.0382401	0.0344557	0.0318032	0
chr1:110610265-110613303*Island	1	chr1:110610265-110613303	Island	ALX3	1.2236e-08	9.26853e-07	13	13	cg01572884	110610266	5.8779e-10	2.59128e-07	0.332108	0.390838	0.392998	-0.0608904	0.0242393	0.0398888	0.0218883	0
chr1:92945907-92952609*Island	1	chr1:92945907-92952609	Island	GFI1	1.23818e-08	9.26853e-07	59	57	cg14179389	92947961	3.02371e-10	1.47593e-07	0.343116	0.176988	0.208433	0.134683	0.0807275	0.0578616	0.0686108	0
chr13:113663201-113663539*N_Shelf	13	chr13:113663201-113663539	N_Shelf	MCF2L	1.38239e-08	1.03086e-06	7	6	cg26682407	113660246	5.20725e-08	1.12036e-05	0.182034	0.261391	0.256629	-0.0745954	0.0339237	0.0386426	0.0346003	0
chr3:191046948-191047710*S_Shore	3	chr3:191046948-191047710	S_Shore	CCDC50	1.38793e-08	1.03193e-06	8	7	cg27312961	191048361	5.63443e-10	2.51992e-07	0.427931	0.496406	0.515608	-0.0876776	0.0372515	0.0656846	0.0357866	0
chr3:191046948-191047710*S_Shore	3	chr3:191046948-191047710	S_Shore	UTS2D	1.38793e-08	1.03193e-06	8	7	cg27312961	191048361	5.63443e-10	2.51992e-07	0.427931	0.496406	0.515608	-0.0876776	0.0372515	0.0656846	0.0357866	0
chr9:123690771-123691675*N_Shore	9	chr9:123690771-123691675	N_Shore	TRAF1	1.39904e-08	1.03888e-06	3	3	cg04517263	123689193	9.16554e-09	2.60075e-06	0.0659552	0.12352	0.128684	-0.0627289	0.0158215	0.0311814	0.0237608	0
chr3:182971429-182972635*N_Shore	3	chr3:182971429-182972635	N_Shore	B3GNT5	1.62998e-08	1.19802e-06	11	9	cg27324128	182970728	8.24963e-07	0.000111735	0.446908	0.370265	0.382475	0.0644324	0.0308995	0.0419509	0.0384048	0
chr3:182971429-182972635*N_Shore	3	chr3:182971429-182972635	N_Shore	MCF2L2	1.62998e-08	1.19802e-06	11	9	cg27324128	182970728	8.24963e-07	0.000111735	0.446908	0.370265	0.382475	0.0644324	0.0308995	0.0419509	0.0384048	0
chr15:72409862-72411002*S_Shore	15	chr15:72409862-72411002	S_Shore	MYO9A	1.63334e-08	1.19802e-06	4	4	cg19846991	72411513	1.86368e-07	3.25471e-05	0.385435	0.29859	0.309729	0.0757058	0.0484275	0.0410091	0.0309623	0
chr15:72409862-72411002*S_Shore	15	chr15:72409862-72411002	S_Shore	SENP8	1.63334e-08	1.19802e-06	4	4	cg19846991	72411513	1.86368e-07	3.25471e-05	0.385435	0.29859	0.309729	0.0757058	0.0484275	0.0410091	0.0309623	0
chr17:18086258-18088360*Island	17	chr17:18086258-18088360	Island	ALKBH5	1.63988e-08	1.19802e-06	14	14	cg22622440	18088359	9.99194e-10	4.01068e-07	0.209607	0.131418	0.1425	0.0671069	0.0303621	0.0192459	0.0194711	0
chr7:100463758-100464146*S_Shore	7	chr7:100463758-100464146	S_Shore	TRIP6	1.64394e-08	1.19802e-06	9	8	cg22851200	100465833	4.50553e-09	1.44877e-06	0.714329	0.60952	0.624404	0.0899251	0.0450107	0.0611344	0.0477227	0
chr1:217262998-217263214*S_Shore	1	chr1:217262998-217263214	S_Shore	ESRRG	1.75941e-08	1.27794e-06	4	4	cg07312357	217263805	1.02307e-09	4.07865e-07	0.742426	0.674718	0.656106	0.0863198	0.0355541	0.0614558	0.0420675	0
chr19:45411720-45412600*N_Shelf	19	chr19:45411720-45412600	N_Shelf	APOE	1.78708e-08	1.28275e-06	8	8	cg14123992	45407868	1.35e-07	2.47538e-05	0.843547	0.783831	0.808841	0.0347061	0.0199189	0.0447953	0.0214507	0
chr6:31628338-31628658*N_Shore	6	chr6:31628338-31628658	N_Shore	C6orf47	1.78861e-08	1.28275e-06	24	23	cg24818562	31627714	4.52175e-09	1.45133e-06	0.37836	0.332747	0.332378	0.0459817	0.025684	0.0313523	0.0242899	0
chr17:71306975-71308682*N_Shore	17	chr17:71306975-71308682	N_Shore	CDC42EP4	1.81654e-08	1.3012e-06	3	3	cg01620611	71306145	8.58284e-10	3.52539e-07	0.50068	0.429231	0.435255	0.0654257	0.0359477	0.0483182	0.0324285	0
chr1:36042432-36043444*Island	1	chr1:36042432-36043444	Island	TFAP2E	1.82701e-08	1.30234e-06	7	7	cg07196426	36042433	5.23033e-10	2.36926e-07	0.322599	0.439345	0.424974	-0.102375	0.0490949	0.0638178	0.0387785	0
chr17:77043741-77044489*N_Shore	17	chr17:77043741-77044489	N_Shore	C1QTNF1	1.88036e-08	1.33229e-06	9	8	cg06097994	77043171	6.46499e-08	1.3324e-05	0.789569	0.73916	0.760166	0.0294023	0.0310241	0.0349515	0.0250394	0
chr2:157292102-157292646*N_Shore	2	chr2:157292102-157292646	N_Shore	GPD2	1.90888e-08	1.34924e-06	7	6	cg02276944	157291826	1.71207e-09	6.39162e-07	0.417295	0.365591	0.383815	0.0334803	0.0355292	0.0441266	0.0337969	0
chr8:131370087-131371317*N_Shore	8	chr8:131370087-131371317	N_Shore	ASAP1	1.92998e-08	1.36197e-06	4	4	cg08447387	131369596	1.2782e-08	3.37174e-06	0.58675	0.525755	0.538783	0.0479671	0.0353651	0.0376936	0.0301993	0
chr6:32055067-32055601*N_Shore	6	chr6:32055067-32055601	N_Shore	TNXB	1.94943e-08	1.36748e-06	17	15	cg14737484	32054561	5.01441e-09	1.59206e-06	0.283886	0.381512	0.392598	-0.108712	0.0375296	0.0605444	0.0322574	0
chr19:16308557-16309313*N_Shore	19	chr19:16308557-16309313	N_Shore	AP1M1	1.96619e-08	1.37704e-06	4	4	cg23677833	16308345	3.24172e-08	7.55591e-06	0.205902	0.119823	0.14857	0.0573316	0.0350578	0.0184555	0.0226852	0
chr2:220427148-220427395*N_Shelf	2	chr2:220427148-220427395	N_Shelf	OBSL1	1.97734e-08	1.37913e-06	4	4	cg25565850	220424853	1.36546e-06	0.000170888	0.139837	0.103864	0.117012	0.0228244	0.0326023	0.0194221	0.0184012	0
chr12:106751416-106751965*N_Shore	12	chr12:106751416-106751965	N_Shore	POLR3B	2.08679e-08	1.45227e-06	5	5	cg23477940	106751214	3.76627e-09	1.23586e-06	0.223419	0.140079	0.165221	0.0581985	0.0411922	0.0447855	0.0352419	0
chr1:45265534-45266783*Island	1	chr1:45265534-45266783	Island	PLK3	2.10423e-08	1.4598e-06	9	8	cg17233819	45266782	3.87662e-10	1.8363e-07	0.513038	0.46111	0.461008	0.0520298	0.04457	0.0366397	0.0290942	0
chr3:44596535-44597018*N_Shore	3	chr3:44596535-44597018	N_Shore	ZNF167	2.17713e-08	1.50386e-06	4	4	cg03795847	44596512	1.87415e-09	6.9089e-07	0.438615	0.547106	0.520671	-0.0820556	0.0429709	0.0402517	0.0287427	0
chr8:145027911-145028352*Island	8	chr8:145027911-145028352	Island	PLEC1	2.21805e-08	1.52793e-06	7	7	cg19497517	145028257	5.50415e-10	2.47421e-07	0.475176	0.296936	0.334956	0.140221	0.0810895	0.0652967	0.0565969	0
chr11:65547499-65549261*N_Shore	11	chr11:65547499-65549261	N_Shore	DKFZp761E198	2.28828e-08	1.57201e-06	8	7	cg05257275	65547049	8.85933e-10	3.61368e-07	0.584548	0.520591	0.526413	0.0581346	0.0368487	0.0399297	0.04367	0
chr2:27308546-27309770*Island	2	chr2:27308546-27309770	Island	KHK	2.31035e-08	1.58408e-06	5	5	cg15170715	27308877	3.91305e-10	1.84858e-07	0.112989	0.0531829	0.0545882	0.058401	0.0279319	0.0104214	0.00944682	0
chr2:27308546-27309770*Island	2	chr2:27308546-27309770	Island	EMILIN1	2.31035e-08	1.58408e-06	5	5	cg15170715	27308877	3.91305e-10	1.84858e-07	0.112989	0.0531829	0.0545882	0.058401	0.0279319	0.0104214	0.00944682	0
chr12:56360467-56360909*N_Shore	12	chr12:56360467-56360909	N_Shore	SILV	2.38309e-08	1.62825e-06	9	9	cg01810863	56359916	1.03027e-08	2.86349e-06	0.417735	0.362326	0.388217	0.0295181	0.0489316	0.0430856	0.0522635	0
chr12:56360467-56360909*N_Shore	12	chr12:56360467-56360909	N_Shore	CDK2	2.38309e-08	1.62825e-06	9	9	cg01810863	56359916	1.03027e-08	2.86349e-06	0.417735	0.362326	0.388217	0.0295181	0.0489316	0.0430856	0.0522635	0
chr3:186917411-186917756*N_Shelf	3	chr3:186917411-186917756	N_Shelf	RTP1	2.39526e-08	1.63159e-06	6	6	cg08749917	186915320	1.11977e-05	0.000963517	0.586653	0.547268	0.543011	0.0436425	0.0288999	0.0433655	0.0367678	0
chr19:1434613-1435063*Island	19	chr19:1434613-1435063	Island	DAZAP1	2.4429e-08	1.65494e-06	3	3	cg23311195	1434935	3.85268e-09	1.25719e-06	0.717987	0.665726	0.668924	0.0490634	0.0304846	0.0419363	0.0211272	0
chr22:31741045-31743707*Island	22	chr22:31741045-31743707	Island	PATZ1	2.44657e-08	1.65494e-06	10	10	cg13003054	31741284	6.99033e-08	1.41583e-05	0.133779	0.092054	0.0951295	0.038649	0.02182	0.0177906	0.0103083	0
chr17:40171931-40172281*N_Shore	17	chr17:40171931-40172281	N_Shore	NKIRAS2	2.6136e-08	1.76454e-06	5	5	cg22361181	40171740	1.36072e-07	2.48986e-05	0.399446	0.349548	0.373225	0.0262212	0.0281873	0.02514	0.0254751	0
chr5:35617855-35618339*N_Shore	5	chr5:35617855-35618339	N_Shore	SPEF2	2.63193e-08	1.77487e-06	3	3	cg16578742	35617687	6.96456e-10	2.98711e-07	0.43022	0.301976	0.321561	0.108659	0.0650671	0.0713093	0.0496631	0
chr8:145751955-145756326*Island	8	chr8:145751955-145756326	Island	LRRC24	2.6843e-08	1.79644e-06	20	20	cg06341195	145751956	2.1162e-08	5.2447e-06	0.691415	0.618166	0.615789	0.0756257	0.0276688	0.0465023	0.0396983	0
chr8:145751955-145756326*Island	8	chr8:145751955-145756326	Island	MGC70857	2.6843e-08	1.79644e-06	20	20	cg06341195	145751956	2.1162e-08	5.2447e-06	0.691415	0.618166	0.615789	0.0756257	0.0276688	0.0465023	0.0396983	0
chr17:7492314-7492945*Island	17	chr17:7492314-7492945	Island	SOX15	2.74651e-08	1.8264e-06	3	3	cg14824495	7492801	7.2081e-09	2.1383e-06	0.277036	0.192576	0.193288	0.0837475	0.0306171	0.0297461	0.0287739	0
chr6:32163292-32164383*S_Shore	6	chr6:32163292-32164383	S_Shore	NOTCH4	2.76513e-08	1.8264e-06	25	23	cg06891815	32165237	7.32788e-10	3.11897e-07	0.769969	0.718046	0.706306	0.0636626	0.0260288	0.04244	0.0344381	0
chr17:909981-910442*N_Shore	17	chr17:909981-910442	N_Shore	ABR	2.819e-08	1.85905e-06	3	3	cg05707655	908690	8.60438e-10	3.52601e-07	0.576173	0.470006	0.458085	0.118088	0.0414429	0.0473015	0.0397422	0
chr15:52029230-52030135*S_Shore	15	chr15:52029230-52030135	S_Shore	LYSMD2	2.84549e-08	1.87232e-06	7	6	cg10941749	52030519	7.15661e-10	3.06086e-07	0.524688	0.480135	0.493702	0.0309861	0.0396858	0.0382341	0.0262018	0
chr16:87948518-87948765*N_Shore	16	chr16:87948518-87948765	N_Shore	CA5A	2.8797e-08	1.892e-06	4	4	cg06987053	87947779	9.95834e-07	0.000131149	0.402007	0.381719	0.396672	0.00533454	0.0296512	0.0403037	0.0410649	0
chr7:2116367-2116781*N_Shore	7	chr7:2116367-2116781	N_Shore	MAD1L1	2.89346e-08	1.8975e-06	5	5	cg20556803	2114593	5.66488e-10	2.52074e-07	0.236193	0.330713	0.322189	-0.0859953	0.0421733	0.0351291	0.0277988	0
chr1:235805318-235805771*Island	1	chr1:235805318-235805771	Island	GNG4	2.93587e-08	1.92246e-06	4	4	cg22076160	235805690	6.52908e-08	1.33934e-05	0.199624	0.148011	0.124414	0.0752093	0.0435272	0.0333932	0.0261454	0
chr17:7227416-7227698*Island	17	chr17:7227416-7227698	Island	NEURL4	2.99127e-08	1.95655e-06	3	3	cg12219789	7227499	1.0082e-09	4.02847e-07	0.592451	0.519273	0.542838	0.0496131	0.0275984	0.0422061	0.0258195	0
chr19:48204529-48205776*Island	19	chr19:48204529-48205776	Island	GLTSCR1	3.00592e-08	1.96322e-06	4	4	cg23511285	48205761	1.19787e-07	2.23363e-05	0.468304	0.415997	0.434396	0.033908	0.0471421	0.047684	0.0611098	0
chr1:8002408-8002699*N_Shore	1	chr1:8002408-8002699	N_Shore	TNFRSF9	3.02358e-08	1.97183e-06	5	4	cg18025409	8001046	2.09459e-09	7.50183e-07	0.41678	0.30055	0.293321	0.123458	0.0620063	0.0597292	0.0424963	0
chr19:4909262-4910256*S_Shore	19	chr19:4909262-4910256	S_Shore	UHRF1	3.0693e-08	1.99647e-06	7	7	cg17714703	4912221	1.07682e-05	0.000932421	0.30572	0.206277	0.190268	0.115452	0.0597501	0.0457288	0.0454802	0
chr1:146714089-146715278*N_Shore	1	chr1:146714089-146715278	N_Shore	CHD1L	3.19552e-08	2.07249e-06	5	5	cg07572770	146713916	1.08073e-09	4.26988e-07	0.249577	0.159282	0.164731	0.0848462	0.0385485	0.0365754	0.0310701	0
chr12:12419679-12420541*N_Shore	12	chr12:12419679-12420541	N_Shore	LRP6	3.19911e-08	2.07249e-06	7	6	cg04051152	12418005	2.18286e-06	0.000250419	0.68527	0.63458	0.644735	0.0405348	0.0245741	0.0340835	0.0246905	0
chr9:88896741-88897721*S_Shore	9	chr9:88896741-88897721	S_Shore	ISCA1	3.23593e-08	2.09005e-06	3	3	cg14324502	88898587	1.96125e-09	7.09638e-07	0.48095	0.34005	0.364878	0.116072	0.0554267	0.0523047	0.0521638	0
chr17:4510554-4510777*Island	17	chr17:4510554-4510777	Island	SMTNL2	3.26525e-08	2.10374e-06	4	4	cg06024642	4510776	1.30861e-08	3.43143e-06	0.556105	0.495737	0.505174	0.0509309	0.0412159	0.0376773	0.0337164	0
chr1:156338758-156339251*Island	1	chr1:156338758-156339251	Island	RHBG	3.29467e-08	2.11805e-06	6	6	cg13423770	156338775	4.27318e-09	1.38416e-06	0.461567	0.413171	0.427048	0.0345189	0.0323314	0.033248	0.0302486	0
chr17:76228110-76228380*N_Shore	17	chr17:76228110-76228380	N_Shore	LOC283999	3.31939e-08	2.12618e-06	11	10	cg04920452	76227681	1.82698e-06	0.000218113	0.567891	0.519376	0.503031	0.0648605	0.0305959	0.051501	0.0288207	0
chr11:406491-407871*Island	11	chr11:406491-407871	Island	SIGIRR	3.33398e-08	2.13011e-06	7	7	cg18351999	406901	4.0143e-08	8.99954e-06	0.113313	0.0789194	0.0746777	0.038635	0.0236112	0.0153895	0.0104283	0
chr11:119292689-119292891*Island	11	chr11:119292689-119292891	Island	THY1	3.3434e-08	2.13381e-06	3	3	cg05916744	119292737	1.16725e-08	3.13539e-06	0.114608	0.0359477	0.0230298	0.0915784	0.0501496	0.0158718	0.00765138	0
chr13:113410004-113410362*N_Shelf	13	chr13:113410004-113410362	N_Shelf	ATP11A	3.36773e-08	2.14622e-06	5	4	cg12758082	113407769	8.99435e-09	2.56457e-06	0.235958	0.294258	0.284246	-0.0482879	0.0232703	0.0266503	0.0238599	0
chr1:35227028-35227276*N_Shore	1	chr1:35227028-35227276	N_Shore	GJB4	3.38163e-08	2.14864e-06	4	4	cg07594531	35225326	5.17414e-09	1.6335e-06	0.66498	0.590778	0.57465	0.0903299	0.0288967	0.050295	0.0403109	0
chr14:103593234-103593923*Island	14	chr14:103593234-103593923	Island	TNFAIP2	3.38249e-08	2.14864e-06	5	5	cg18587137	103593503	7.45293e-08	1.48899e-05	0.982065	0.871294	0.843564	0.1385	0.0165295	0.0700406	0.0748143	0
chr18:3448006-3452360*N_Shore	18	chr18:3448006-3452360	N_Shore	TGIF1	3.41606e-08	2.16528e-06	6	6	cg07529654	3447016	1.29514e-09	5.00476e-07	0.620494	0.483157	0.524488	0.0960058	0.0509859	0.0709845	0.0503212	0
chr6:43477221-43478553*Island	6	chr6:43477221-43478553	Island	C6orf154	3.46159e-08	2.18706e-06	9	9	cg00142670	43478496	5.48583e-09	1.72004e-06	0.795166	0.670682	0.675872	0.119294	0.0470698	0.0573027	0.0380857	0
chr12:110318011-110318778*N_Shore	12	chr12:110318011-110318778	N_Shore	GLTP	3.48797e-08	2.19668e-06	4	4	cg01300317	110316883	5.11441e-07	7.57323e-05	0.531689	0.479599	0.502101	0.0295885	0.0286713	0.0455206	0.0329302	0
chr1:854765-854973*S_Shore	1	chr1:854765-854973	S_Shore	FLJ39609	3.48929e-08	2.19668e-06	6	6	cg09856436	855649	9.59667e-08	1.84611e-05	0.51694	0.471361	0.491275	0.0256648	0.04344	0.0443072	0.0386532	0
chr2:102313549-102314478*S_Shore	2	chr2:102313549-102314478	S_Shore	MAP4K4	3.49957e-08	2.19923e-06	5	5	cg19254047	102315097	4.48314e-08	9.89502e-06	0.0367974	0.0558698	0.0573291	-0.0205317	0.00769222	0.0177328	0.0159326	0
chr17:36886108-36886525*N_Shore	17	chr17:36886108-36886525	N_Shore	CISD3	3.53353e-08	2.21819e-06	3	3	cg27492942	36885965	3.0075e-08	7.08496e-06	0.453337	0.372248	0.396808	0.056529	0.0352791	0.0639958	0.0422429	0
chr17:36886108-36886525*N_Shore	17	chr17:36886108-36886525	N_Shore	MLLT6	3.53353e-08	2.21819e-06	3	3	cg27492942	36885965	3.0075e-08	7.08496e-06	0.453337	0.372248	0.396808	0.056529	0.0352791	0.0639958	0.0422429	0
chr10:135048797-135052077*Island	10	chr10:135048797-135052077	Island	VENTX	3.75478e-08	2.32642e-06	43	37	cg07370771	135050957	8.48567e-07	0.00011423	0.414092	0.329694	0.33671	0.0773824	0.047493	0.0712633	0.0357279	0
chr1:151300522-151300724*N_Shore	1	chr1:151300522-151300724	N_Shore	PI4KB	3.7644e-08	2.32747e-06	7	6	cg14149172	151298905	3.2827e-08	7.62119e-06	0.483958	0.391513	0.412727	0.0712311	0.0341039	0.0378193	0.0368266	0
chr19:50192499-50192802*Island	19	chr19:50192499-50192802	Island	C19orf76	3.84955e-08	2.37512e-06	3	3	cg00507154	50192739	1.17222e-08	3.14395e-06	0.839054	0.708227	0.717612	0.121442	0.0554267	0.0574747	0.0323884	0
chr16:88039616-88039904*N_Shore	16	chr16:88039616-88039904	N_Shore	BANP	3.95556e-08	2.43711e-06	4	4	cg01603912	88039185	1.09649e-09	4.32243e-07	0.409913	0.313058	0.314675	0.0952381	0.0515238	0.0503983	0.0536778	0
chr1:26856191-26856684*N_Shore	1	chr1:26856191-26856684	N_Shore	RPS6KA1	4.0312e-08	2.48024e-06	4	4	cg22512670	26855765	1.19581e-07	2.23214e-05	0.587485	0.512584	0.550855	0.0366305	0.0304482	0.0516743	0.0343985	0
chr7:127227758-127229039*S_Shelf	7	chr7:127227758-127229039	S_Shelf	ARF5	4.05341e-08	2.4913e-06	3	3	cg14938677	127231698	3.25716e-09	1.09252e-06	0.326825	0.378485	0.386504	-0.0596791	0.0328738	0.0316632	0.0317378	0
chr21:46306508-46306795*Island	21	chr21:46306508-46306795	Island	ITGB2	4.11544e-08	2.52558e-06	3	3	cg24850445	46306794	1.05554e-05	0.000918507	0.839267	0.865714	0.857367	-0.0180999	0.0181009	0.0181089	0.0131802	0
chr4:149363212-149367056*N_Shore	4	chr4:149363212-149367056	N_Shore	NR3C2	4.11779e-08	2.52558e-06	4	3	cg05437692	149362435	3.41619e-09	1.13365e-06	0.254668	0.262833	0.296433	-0.0417655	0.0364648	0.0378044	0.0295742	0
chr16:89573954-89575368*N_Shore	16	chr16:89573954-89575368	N_Shore	SPG7	4.1372e-08	2.53308e-06	5	5	cg09560549	89573369	4.59693e-08	1.00399e-05	0.321563	0.424444	0.419795	-0.0982318	0.0343219	0.0374485	0.0348326	0
chr16:88502814-88504340*Island	16	chr16:88502814-88504340	Island	ZNF469	4.23786e-08	2.58711e-06	5	5	cg00856775	88504211	1.38436e-08	3.59793e-06	0.583213	0.489931	0.496464	0.0867491	0.0366713	0.0600678	0.0319632	0
chr17:36665988-36667234*Island	17	chr17:36665988-36667234	Island	ARHGAP23	4.24013e-08	2.58711e-06	5	5	cg04645039	36667233	2.18465e-09	7.79271e-07	0.484011	0.630103	0.620364	-0.136353	0.0501293	0.0573607	0.0406644	0
chr1:111746337-111747303*N_Shelf	1	chr1:111746337-111747303	N_Shelf	DENND2D	4.31288e-08	2.62332e-06	10	9	cg20317872	111743202	2.98298e-08	7.03659e-06	0.395062	0.468239	0.452872	-0.0578099	0.0332353	0.0356526	0.0402242	0
chr8:1921559-1922872*S_Shore	8	chr8:1921559-1922872	S_Shore	KBTBD11	4.49565e-08	2.73167e-06	3	3	cg09147140	1924394	1.12508e-07	2.11582e-05	0.53253	0.415711	0.459021	0.0735092	0.0569761	0.0543058	0.0550533	0
chr7:102073605-102074334*N_Shore	7	chr7:102073605-102074334	N_Shore	ORAI2	4.57311e-08	2.77586e-06	3	3	cg02564523	102073539	8.8367e-09	2.5237e-06	0.230717	0.363658	0.328012	-0.0972958	0.0370937	0.0639229	0.0330912	0
chr17:1551730-1553249*S_Shore	17	chr17:1551730-1553249	S_Shore	RILP	4.59492e-08	2.77691e-06	11	9	cg23488607	1553502	9.23329e-08	1.79006e-05	0.549683	0.479844	0.500582	0.049101	0.0249339	0.0470003	0.0352	0
chr8:144651572-144652288*Island	8	chr8:144651572-144652288	Island	C8orf73	4.59532e-08	2.77691e-06	4	4	cg11904266	144652042	2.83467e-08	6.72276e-06	0.820203	0.732715	0.711572	0.10863	0.0332119	0.057012	0.0380324	0
chr1:25255527-25259005*N_Shore	1	chr1:25255527-25259005	N_Shore	RUNX3	4.78146e-08	2.88346e-06	6	6	cg03769939	25254129	1.51112e-06	0.000186468	0.73687	0.72871	0.734035	0.00283488	0.0590348	0.0397353	0.0424384	0
chr11:64397644-64398016*Island	11	chr11:64397644-64398016	Island	NRXN2	4.85904e-08	2.92324e-06	3	3	cg27466845	64397734	8.0696e-08	1.59055e-05	0.910496	0.806899	0.799949	0.110547	0.0297106	0.0763542	0.0620335	0
chr13:114813942-114814457*Island	13	chr13:114813942-114814457	Island	RASA3	4.86613e-08	2.92351e-06	5	4	cg01289343	114814401	2.0574e-09	7.38362e-07	0.153261	0.25446	0.268191	-0.114931	0.028296	0.0496359	0.0483338	0
chr13:110434466-110440180*N_Shore	13	chr13:110434466-110440180	N_Shore	IRS2	5.0511e-08	3.03051e-06	4	4	cg25924746	110432935	3.2893e-09	1.09775e-06	0.730479	0.622963	0.658531	0.071948	0.0390197	0.0434335	0.0455811	0
chr17:40335946-40336609*Island	17	chr17:40335946-40336609	Island	HCRT	5.18769e-08	3.10928e-06	3	3	cg19965511	40336475	1.76876e-07	3.11676e-05	0.17621	0.138088	0.140317	0.035893	0.0296963	0.0231597	0.0183327	0
chr1:2046429-2046865*Island	1	chr1:2046429-2046865	Island	PRKCZ	5.22365e-08	3.12658e-06	4	4	cg09179248	2046783	2.59752e-08	6.22737e-06	0.701813	0.841292	0.816697	-0.114883	0.0548498	0.0371111	0.0428855	0
chr16:88101473-88101911*S_Shore	16	chr16:88101473-88101911	S_Shore	BANP	5.23565e-08	3.12739e-06	6	6	cg04583842	88103117	5.1701e-08	1.11373e-05	0.336961	0.439431	0.401043	-0.0640815	0.062377	0.0605675	0.047129	0
chr11:62211989-62212196*Island	11	chr11:62211989-62212196	Island	AHNAK	5.29713e-08	3.1609e-06	4	3	cg12857638	62212169	3.25065e-07	5.25023e-05	0.191689	0.124482	0.117786	0.0739032	0.0506048	0.032516	0.0236846	0
chr19:39440404-39441011*S_Shelf	19	chr19:39440404-39441011	S_Shelf	FBXO17	5.3523e-08	3.18949e-06	4	4	cg11395414	39443284	6.66557e-06	0.000630226	0.614966	0.505763	0.517491	0.0974755	0.102265	0.101707	0.0819219	0
chr17:73401217-73401988*S_Shore	17	chr17:73401217-73401988	S_Shore	GRB2	5.36361e-08	3.193e-06	3	3	cg04156850	73402572	3.81023e-09	1.24565e-06	0.296818	0.211339	0.214538	0.0822805	0.0386935	0.0504849	0.029336	0
chr17:79958088-79958369*S_Shore	17	chr17:79958088-79958369	S_Shore	ASPSCR1	5.39642e-08	3.20927e-06	3	3	cg20287434	79958592	9.59695e-09	2.71612e-06	0.751118	0.690897	0.698113	0.0530052	0.0253508	0.0502759	0.028415	0
chr17:45928211-45928710*N_Shore	17	chr17:45928211-45928710	N_Shore	SP6	5.45295e-08	3.23961e-06	3	3	cg06138226	45927893	2.84917e-07	4.66594e-05	0.694312	0.770599	0.782706	-0.0883947	0.0442957	0.0453356	0.0309616	0
chr19:2250560-2253959*Island	19	chr19:2250560-2253959	Island	AMH	5.53101e-08	3.26726e-06	18	17	cg06615152	2250561	1.50035e-09	5.65279e-07	0.447537	0.341874	0.339636	0.107901	0.0430713	0.0512055	0.0405616	0
chr7:157387053-157387322*S_Shelf	7	chr7:157387053-157387322	S_Shelf	PTPRN2	5.68022e-08	3.34867e-06	6	6	cg25910519	157389729	2.8124e-08	6.67892e-06	0.818772	0.746241	0.755247	0.0635253	0.038086	0.0574373	0.0251119	0
chr6:33244677-33245554*Island	6	chr6:33244677-33245554	Island	B3GALT4	5.79214e-08	3.39308e-06	24	19	cg17416730	33245541	2.35871e-09	8.3126e-07	0.11008	0.0790248	0.0722896	0.0377906	0.028396	0.0152663	0.0108309	0
chr5:95296368-95297438*N_Shore	5	chr5:95296368-95297438	N_Shore	ELL2	5.90344e-08	3.45369e-06	4	4	cg14442492	95296150	1.23668e-09	4.79994e-07	0.477294	0.367868	0.408996	0.0682977	0.0387067	0.0584132	0.0396813	0
chr10:132893428-132893688*N_Shore	10	chr10:132893428-132893688	N_Shore	TCERG1L	5.98116e-08	3.49336e-06	5	5	cg25065723	132892405	1.0347e-08	2.86675e-06	0.568723	0.485574	0.468084	0.100639	0.0457989	0.0437842	0.0468914	0
chr12:57623420-57623903*N_Shore	12	chr12:57623420-57623903	N_Shore	SHMT2	6.02306e-08	3.51317e-06	4	4	cg06868473	57622801	2.41652e-09	8.44876e-07	0.233519	0.275306	0.309716	-0.0761975	0.033553	0.0543109	0.0236759	0
chr11:47573911-47574899*S_Shore	11	chr11:47573911-47574899	S_Shore	CUGBP1	6.04978e-08	3.52526e-06	3	3	cg19460817	47575278	3.26124e-09	1.09252e-06	0.670489	0.575915	0.553138	0.117351	0.0379047	0.0680188	0.0438726	0
chr5:110847820-110848445*S_Shore	5	chr5:110847820-110848445	S_Shore	STARD4	6.30528e-08	3.66807e-06	5	5	cg11925263	110849104	6.27916e-08	1.29866e-05	0.554645	0.418357	0.467411	0.0872343	0.0483045	0.0704584	0.0637037	0
chr17:26925742-26926512*S_Shore	17	chr17:26925742-26926512	S_Shore	SPAG5	6.65376e-08	3.84484e-06	4	4	cg17960080	26926868	9.85553e-09	2.77686e-06	0.139446	0.0633466	0.071345	0.0681007	0.0450799	0.0176819	0.0177975	0
chr17:80277118-80277833*N_Shelf	17	chr17:80277118-80277833	N_Shelf	CD7	6.66368e-08	3.84484e-06	7	7	cg25877299	80273290	1.55929e-08	3.98209e-06	0.54962	0.473571	0.461961	0.0876592	0.0450949	0.0476201	0.0311293	0
chr11:110581839-110583883*S_Shore	11	chr11:110581839-110583883	S_Shore	ARHGAP20	7.05337e-08	4.06436e-06	4	4	cg06106428	110584327	1.90248e-09	6.95222e-07	0.373049	0.457354	0.504589	-0.13154	0.0451098	0.0674722	0.0507319	0
chr17:7218175-7218960*S_Shore	17	chr17:7218175-7218960	S_Shore	NEURL4	7.36502e-08	4.23253e-06	6	5	cg12282267	7219261	7.4134e-08	1.48277e-05	0.628716	0.577357	0.5898	0.0389162	0.0250453	0.0324414	0.0284981	0
chr17:7218175-7218960*S_Shore	17	chr17:7218175-7218960	S_Shore	GPS2	7.36502e-08	4.23253e-06	6	5	cg12282267	7219261	7.4134e-08	1.48277e-05	0.628716	0.577357	0.5898	0.0389162	0.0250453	0.0324414	0.0284981	0
chr6:33385678-33386262*N_Shore	6	chr6:33385678-33386262	N_Shore	CUTA	7.40608e-08	4.23253e-06	25	19	cg23565821	33385056	1.95986e-07	3.40918e-05	0.416326	0.343637	0.349919	0.0664072	0.0417867	0.039202	0.0273774	0
chr15:90191478-90192617*N_Shore	15	chr15:90191478-90192617	N_Shore	KIF7	7.41314e-08	4.23253e-06	4	4	cg17794320	90190822	2.78307e-07	4.58325e-05	0.781973	0.722907	0.724999	0.0569747	0.0293002	0.0678159	0.0401295	0
chr5:169533080-169533534*Island	5	chr5:169533080-169533534	Island	FOXI1	7.41968e-08	4.23253e-06	3	3	cg05603791	169533120	7.67113e-09	2.24915e-06	0.639326	0.559567	0.58252	0.0568058	0.0313342	0.0369619	0.0259043	0
chr19:16178396-16178609*N_Shore	19	chr19:16178396-16178609	N_Shore	TPM4	7.80458e-08	4.44347e-06	6	6	cg22041417	16178195	2.55525e-05	0.00188553	0.663973	0.577227	0.610908	0.0530651	0.049291	0.0635027	0.0409011	0
chr14:24835810-24836220*Island	14	chr14:24835810-24836220	Island	NFATC4	8.28956e-08	4.70742e-06	5	4	cg26705574	24836219	2.36989e-09	8.31874e-07	0.0857619	0.108824	0.108751	-0.0229893	0.0213571	0.023199	0.0156977	0
chr1:3203765-3204453*N_Shelf	1	chr1:3203765-3204453	N_Shelf	PRDM16	8.43465e-08	4.77136e-06	3	3	cg23034362	3200586	2.57898e-09	8.92819e-07	0.339816	0.260835	0.268267	0.0715489	0.0341227	0.0442311	0.025358	0
chr22:25755941-25756164*S_Shelf	22	chr22:25755941-25756164	S_Shelf	LRP5L	8.45601e-08	4.77425e-06	6	6	cg23597288	25758455	1.53095e-06	0.000188125	0.40872	0.319896	0.344071	0.0646486	0.0448125	0.0496654	0.0348646	0
chr8:11057684-11058479*Island	8	chr8:11057684-11058479	Island	XKR6	8.49517e-08	4.79175e-06	3	3	cg12276019	11057947	1.91985e-09	6.98966e-07	0.131319	0.221226	0.204028	-0.0727091	0.0326851	0.0472911	0.0341217	0
chr12:98987193-98988203*N_Shore	12	chr12:98987193-98988203	N_Shore	SLC25A3	8.55096e-08	4.81398e-06	4	4	cg16871561	98986887	4.61207e-07	6.99396e-05	0.62892	0.503223	0.501898	0.127022	0.0595971	0.0641389	0.0558486	0
chr21:47705627-47706428*N_Shore	21	chr21:47705627-47706428	N_Shore	C21orf57	8.55644e-08	4.81398e-06	4	4	cg11715092	47705294	1.24483e-07	2.30655e-05	0.256519	0.181798	0.210562	0.0459569	0.0344387	0.0320199	0.0321478	0
chr21:47705627-47706428*N_Shore	21	chr21:47705627-47706428	N_Shore	MCM3AP	8.55644e-08	4.81398e-06	4	4	cg11715092	47705294	1.24483e-07	2.30655e-05	0.256519	0.181798	0.210562	0.0459569	0.0344387	0.0320199	0.0321478	0
chr22:42475474-42476094*N_Shore	22	chr22:42475474-42476094	N_Shore	C22orf32	8.62065e-08	4.84238e-06	5	5	cg07721547	42475119	2.54382e-09	8.85869e-07	0.670933	0.635105	0.6391	0.0318335	0.0300392	0.0441417	0.0283923	0
chr22:42475474-42476094*N_Shore	22	chr22:42475474-42476094	N_Shore	FAM109B	8.62065e-08	4.84238e-06	5	5	cg07721547	42475119	2.54382e-09	8.85869e-07	0.670933	0.635105	0.6391	0.0318335	0.0300392	0.0441417	0.0283923	0
chr12:117536290-117537421*S_Shore	12	chr12:117536290-117537421	S_Shore	TESC	8.82602e-08	4.95142e-06	4	4	cg06750167	117538458	7.39192e-08	1.48184e-05	0.390328	0.32331	0.344029	0.0462993	0.0352217	0.0418949	0.0313642	0
chr8:1797406-1798775*N_Shore	8	chr8:1797406-1798775	N_Shore	ARHGEF10	8.88658e-08	4.97906e-06	4	4	cg22511775	1796506	1.20716e-07	2.24857e-05	0.54287	0.644581	0.659471	-0.116601	0.0501565	0.0456866	0.0355608	0
chr16:58767447-58768328*S_Shore	16	chr16:58767447-58768328	S_Shore	GOT2	8.95679e-08	5.01202e-06	4	4	cg10140957	58768477	6.09221e-09	1.86169e-06	0.272086	0.200601	0.222125	0.0499613	0.0333661	0.0267272	0.0284695	0
chr2:97426800-97427208*Island	2	chr2:97426800-97427208	Island	CNNM4	8.96596e-08	5.01237e-06	4	3	cg11158729	97427027	2.21881e-08	5.4606e-06	0.137879	0.0890937	0.0932143	0.0446646	0.0257254	0.0161586	0.0161481	0
chr7:101559402-101559625*N_Shelf	7	chr7:101559402-101559625	N_Shelf	CUX1	9.36583e-08	5.22597e-06	6	6	cg14012925	101556907	5.81643e-09	1.7981e-06	0.463171	0.366961	0.403718	0.0594533	0.0446186	0.0564921	0.0413696	0
chr19:41082615-41083355*Island	19	chr19:41082615-41083355	Island	SHKBP1	9.51813e-08	5.29754e-06	8	8	cg26272443	41083341	1.11149e-08	3.03653e-06	0.432703	0.35703	0.353021	0.0796825	0.0321345	0.0585649	0.0312756	0
chr4:1828588-1828802*Island	4	chr4:1828588-1828802	Island	LETM1	9.57423e-08	5.32371e-06	3	3	cg09526122	1828794	1.90563e-09	6.95222e-07	0.790496	0.869991	0.872834	-0.0823382	0.0346211	0.0208826	0.0240804	0
chr11:48001604-48003170*Island	11	chr11:48001604-48003170	Island	PTPRJ	9.7447e-08	5.40486e-06	8	8	cg00394658	48001669	1.7505e-08	4.41916e-06	0.253423	0.306164	0.301035	-0.0476118	0.0305407	0.0469369	0.0290729	0
chr7:2116367-2116781*S_Shelf	7	chr7:2116367-2116781	S_Shelf	MAD1L1	9.9122e-08	5.48567e-06	8	7	cg07065756	2119340	2.01995e-09	7.27887e-07	0.269294	0.354255	0.345811	-0.0765178	0.0299497	0.0433784	0.0323156	0
chr11:36397926-36399398*N_Shore	11	chr11:36397926-36399398	N_Shore	PRR5L	1.00943e-07	5.57772e-06	5	5	cg05348871	36397127	3.46744e-07	5.54448e-05	0.349895	0.439196	0.425192	-0.0752977	0.0377229	0.0594025	0.0491651	0
chr16:1495039-1495366*N_Shore	16	chr16:1495039-1495366	N_Shore	CCDC154	1.02601e-07	5.66041e-06	5	5	cg00600033	1494719	2.8475e-07	4.66594e-05	0.613301	0.58487	0.584577	0.0287242	0.0335118	0.0358308	0.0242691	0
chr16:30076310-30077872*N_Shore	16	chr16:30076310-30077872	N_Shore	ALDOA	1.04483e-07	5.74448e-06	11	11	cg00583733	30075102	1.51703e-07	2.72973e-05	0.362812	0.305907	0.327121	0.035691	0.0264433	0.0325654	0.0339071	0
chr19:44763978-44764312*Island	19	chr19:44763978-44764312	Island	ZNF233	1.0512e-07	5.76275e-06	4	4	cg07894352	44763993	5.10552e-08	1.10386e-05	0.092224	0.259906	0.20391	-0.111686	0.0190564	0.0612267	0.0628397	0
chr19:36134153-36135781*N_Shore	19	chr19:36134153-36135781	N_Shore	ETV2	1.05306e-07	5.76275e-06	7	7	cg26340389	36132426	1.48056e-08	3.81055e-06	0.289897	0.232401	0.23431	0.0555871	0.0271309	0.0356499	0.020367	0
chr22:19709081-19712106*Island	22	chr22:19709081-19712106	Island	GP1BB	1.06733e-07	5.81915e-06	12	12	cg11414921	19712034	6.09472e-09	1.86169e-06	0.137869	0.0588711	0.0586056	0.0792631	0.0367734	0.0182303	0.0172911	0
chr22:19709081-19712106*Island	22	chr22:19709081-19712106	Island	2014-09-05	1.06733e-07	5.81915e-06	12	12	cg11414921	19712034	6.09472e-09	1.86169e-06	0.137869	0.0588711	0.0586056	0.0792631	0.0367734	0.0182303	0.0172911	0
chr11:119292689-119292891*S_Shore	11	chr11:119292689-119292891	S_Shore	THY1	1.07885e-07	5.87107e-06	6	6	cg00156427	119294322	6.6428e-09	2.00091e-06	0.275104	0.322283	0.346394	-0.0712902	0.0297242	0.0412573	0.0259874	0
chr20:62737382-62738071*S_Shore	20	chr20:62737382-62738071	S_Shore	NPBWR2	1.09781e-07	5.95175e-06	9	9	cg03102788	62738880	5.18201e-09	1.6335e-06	0.350841	0.272142	0.276983	0.0738573	0.0378298	0.0404932	0.0308407	0
chr4:146019163-146019826*N_Shore	4	chr4:146019163-146019826	N_Shore	ANAPC10	1.09976e-07	5.95175e-06	10	9	cg01713505	146018691	3.79436e-09	1.24276e-06	0.20157	0.149395	0.137321	0.0642487	0.0376578	0.0443244	0.0336672	0
chr4:146019163-146019826*N_Shore	4	chr4:146019163-146019826	N_Shore	ABCE1	1.09976e-07	5.95175e-06	10	9	cg01713505	146018691	3.79436e-09	1.24276e-06	0.20157	0.149395	0.137321	0.0642487	0.0376578	0.0443244	0.0336672	0
chr1:150946496-150947950*N_Shore	1	chr1:150946496-150947950	N_Shore	LASS2	1.11243e-07	6.01295e-06	4	4	cg26058502	150946023	2.89904e-09	9.91281e-07	0.371499	0.292124	0.319046	0.0524532	0.0328991	0.0398631	0.0303558	0
chr12:12939713-12940391*Island	12	chr12:12939713-12940391	Island	APOLD1	1.12426e-07	6.06945e-06	4	4	cg05693982	12940390	1.48131e-08	3.81055e-06	0.365163	0.282644	0.273283	0.0918801	0.0411774	0.0517219	0.0467152	0
chr21:45077671-45079821*Island	21	chr21:45077671-45079821	Island	HSF2BP	1.15266e-07	6.1981e-06	14	13	cg08871016	45079232	4.37649e-09	1.41502e-06	0.146152	0.110465	0.109776	0.036376	0.0167665	0.0225584	0.0163457	0
chr21:45077671-45079821*Island	21	chr21:45077671-45079821	Island	RRP1B	1.15266e-07	6.1981e-06	14	13	cg08871016	45079232	4.37649e-09	1.41502e-06	0.146152	0.110465	0.109776	0.036376	0.0167665	0.0225584	0.0163457	0
chr20:61846843-61848103*Island	20	chr20:61846843-61848103	Island	YTHDF1	1.17591e-07	6.30198e-06	11	11	cg24092253	61848099	1.90066e-08	4.77772e-06	0.32857	0.273	0.288083	0.0404872	0.0339689	0.0297942	0.0308279	0
chr17:7492314-7492945*S_Shore	17	chr17:7492314-7492945	S_Shore	SOX15	1.1797e-07	6.30693e-06	8	8	cg13483263	7493150	1.05287e-08	2.90795e-06	0.732826	0.621837	0.632377	0.100449	0.0348375	0.0571272	0.0336239	0
chr11:61734760-61735932*N_Shelf	11	chr11:61734760-61735932	N_Shelf	FTH1	1.19246e-07	6.36933e-06	3	3	cg02315732	61732658	2.71499e-08	6.49134e-06	0.615691	0.451392	0.527106	0.0885853	0.0417239	0.0791934	0.0563057	0
chr3:173115404-173115775*S_Shore	3	chr3:173115404-173115775	S_Shore	NLGN1	1.19952e-07	6.385e-06	6	6	cg21946824	173116238	7.09698e-07	9.933e-05	0.399436	0.260804	0.263536	0.1359	0.0728187	0.077105	0.0684457	0
chr2:1480758-1481631*S_Shore	2	chr2:1480758-1481631	S_Shore	TPO	1.19974e-07	6.385e-06	6	6	cg12666976	1482838	5.471e-09	1.71845e-06	0.506937	0.436739	0.428737	0.0782	0.0281095	0.0356078	0.0419172	0
chr1:212003431-212004280*N_Shore	1	chr1:212003431-212004280	N_Shore	LPGAT1	1.20353e-07	6.39937e-06	3	3	cg07097417	212002770	6.21327e-09	1.89093e-06	0.681009	0.540411	0.554756	0.126253	0.0623949	0.0647394	0.0577054	0
chr6:32975684-32975926*S_Shore	6	chr6:32975684-32975926	S_Shore	HLA-DOA	1.21785e-07	6.41142e-06	20	19	cg23220637	32976805	1.03872e-07	1.98089e-05	0.724347	0.597534	0.633302	0.091045	0.0369132	0.0716703	0.0367068	0
chr12:49726591-49727114*Island	12	chr12:49726591-49727114	Island	C1QL4	1.21788e-07	6.41142e-06	4	3	cg11949060	49726761	3.71948e-09	1.22279e-06	0.56137	0.455276	0.43405	0.12732	0.0477861	0.0716716	0.0431205	0
chr20:62368955-62371962*Island	20	chr20:62368955-62371962	Island	SLC2A4RG	1.21817e-07	6.41142e-06	12	12	cg22961457	62370310	5.57986e-08	1.18462e-05	0.333312	0.188683	0.214592	0.11872	0.0608277	0.0424643	0.0551513	0
chr20:62368955-62371962*Island	20	chr20:62368955-62371962	Island	LIME1	1.21817e-07	6.41142e-06	12	12	cg22961457	62370310	5.57986e-08	1.18462e-05	0.333312	0.188683	0.214592	0.11872	0.0608277	0.0424643	0.0551513	0
chr17:42276291-42276738*N_Shore	17	chr17:42276291-42276738	N_Shore	ATXN7L3	1.24445e-07	6.54194e-06	5	4	cg11255208	42275334	3.13316e-09	1.05766e-06	0.579925	0.518663	0.525874	0.0540517	0.0262015	0.0390047	0.0249702	0
chr1:2158212-2161173*S_Shelf	1	chr1:2158212-2161173	S_Shelf	SKI	1.2506e-07	6.56449e-06	5	5	cg19404444	2164602	6.53978e-09	1.97325e-06	0.356443	0.275985	0.303761	0.0526827	0.0513965	0.0478191	0.0519866	0
chr6:30654392-30654934*S_Shelf	6	chr6:30654392-30654934	S_Shelf	NRM	1.28659e-07	6.71736e-06	15	14	cg11784631	30658014	6.96794e-07	9.77684e-05	0.376717	0.334376	0.361226	0.0154914	0.0271422	0.0364052	0.0223539	0
chr2:175869574-175870289*Island	2	chr2:175869574-175870289	Island	CHN1	1.29029e-07	6.72078e-06	8	8	cg20258811	175869688	7.15009e-08	1.44321e-05	0.0650749	0.0635239	0.0535818	0.0114931	0.0139962	0.0140445	0.00923257	0
chr1:156783523-156784037*S_Shore	1	chr1:156783523-156784037	S_Shore	NTRK1	1.33743e-07	6.95399e-06	6	6	cg00577202	156784152	3.41267e-09	1.13365e-06	0.237225	0.182757	0.185513	0.0517124	0.0326598	0.0301618	0.0234686	0
chr1:156783523-156784037*S_Shore	1	chr1:156783523-156784037	S_Shore	SH2D2A	1.33743e-07	6.95399e-06	6	6	cg00577202	156784152	3.41267e-09	1.13365e-06	0.237225	0.182757	0.185513	0.0517124	0.0326598	0.0301618	0.0234686	0
chr15:37390175-37390380*N_Shore	15	chr15:37390175-37390380	N_Shore	MEIS2	1.34152e-07	6.96085e-06	7	7	cg24357619	37389384	1.33951e-08	3.49684e-06	0.146656	0.196505	0.18527	-0.0386144	0.0252437	0.034708	0.0160879	0
chr1:36038927-36040051*Island	1	chr1:36038927-36040051	Island	TFAP2E	1.37626e-07	7.13062e-06	6	5	cg26372517	36039159	0.000444498	0.0176349	0.360279	0.317363	0.270569	0.0897097	0.0595317	0.0633138	0.0450538	0
chr3:128719865-128721245*Island	3	chr3:128719865-128721245	Island	CCDC48	1.4125e-07	7.27562e-06	8	6	cg00112465	128719999	5.82991e-09	1.79911e-06	0.107592	0.1494	0.163714	-0.0561223	0.039727	0.0327544	0.0371364	0
chr14:23305893-23307013*N_Shore	14	chr14:23305893-23307013	N_Shore	MMP14	1.42565e-07	7.29601e-06	5	5	cg13094752	23305548	6.13065e-09	1.86901e-06	0.476599	0.394303	0.419929	0.05667	0.0438961	0.0454744	0.0386178	0
chr3:145878430-145879287*S_Shore	3	chr3:145878430-145879287	S_Shore	PLOD2	1.42779e-07	7.29601e-06	6	6	cg06180356	145879710	8.63526e-08	1.68508e-05	0.24588	0.172936	0.173533	0.0723472	0.0573234	0.0563961	0.0446454	0
chr11:68816341-68816951*N_Shore	11	chr11:68816341-68816951	N_Shore	TPCN2	1.43111e-07	7.29601e-06	8	8	cg23247191	68815682	7.95875e-06	0.000729287	0.590068	0.537482	0.555647	0.0344209	0.0326966	0.0540994	0.0378055	0
chr1:1242400-1245185*Island	1	chr1:1242400-1245185	Island	PUSL1	1.43178e-07	7.29601e-06	18	18	cg05397202	1245040	7.56901e-09	2.22661e-06	0.532498	0.474022	0.489801	0.042697	0.0369169	0.0395323	0.0256007	0
chr7:4169481-4169753*N_Shore	7	chr7:4169481-4169753	N_Shore	SDK1	1.43869e-07	7.31637e-06	7	7	cg05642264	4169314	7.51115e-08	1.49892e-05	0.154906	0.23616	0.23762	-0.0827144	0.0261109	0.0484274	0.0476757	0
chr6:31695894-31698245*S_Shelf	6	chr6:31695894-31698245	S_Shelf	CLIC1	1.48291e-07	7.52171e-06	9	9	cg18909389	31701110	8.39725e-09	2.41694e-06	0.44898	0.40809	0.420338	0.0286421	0.0437564	0.043395	0.03829	0
chr1:53791687-53793496*S_Shore	1	chr1:53791687-53793496	S_Shore	LRP8	1.54148e-07	7.80757e-06	5	5	cg04154290	53794211	6.07891e-09	1.86169e-06	0.422336	0.504349	0.520841	-0.0985052	0.0380694	0.0597083	0.0438796	0
chr6:108878830-108883404*Island	6	chr6:108878830-108883404	Island	FOXO3	1.60649e-07	8.09496e-06	18	18	cg03278811	108883330	2.58839e-07	4.29642e-05	0.497676	0.375147	0.390989	0.106687	0.0602427	0.0280275	0.0334307	0
chr20:825267-826276*Island	20	chr20:825267-826276	Island	FAM110A	1.6594e-07	8.34965e-06	7	5	cg08137888	825798	2.51025e-08	6.05107e-06	0.426425	0.286948	0.291421	0.135004	0.0466578	0.0500722	0.0468713	0
chr17:38518965-38520264*N_Shore	17	chr17:38518965-38520264	N_Shore	GJD3	1.70168e-07	8.54774e-06	6	6	cg18748499	38517641	2.40442e-08	5.85539e-06	0.317881	0.275123	0.246632	0.0712493	0.0406657	0.0599749	0.0450349	0
chr7:5413745-5414210*Island	7	chr7:5413745-5414210	Island	TNRC18	1.70705e-07	8.56494e-06	4	4	cg06262098	5413872	1.1719e-06	0.00014953	0.628337	0.587471	0.590552	0.037785	0.0366519	0.0442968	0.0302672	0
chr1:212606105-212606844*Island	1	chr1:212606105-212606844	Island	NENF	1.71555e-07	8.60026e-06	3	3	cg22236626	212606819	1.97647e-06	0.000232029	0.151702	0.113474	0.128663	0.023039	0.0188573	0.0140288	0.0147309	0
chr20:30410547-30410832*N_Shelf	20	chr20:30410547-30410832	N_Shelf	MYLK2	1.72777e-07	8.63203e-06	12	12	cg08726417	30407016	4.54794e-07	6.91589e-05	0.870946	0.819562	0.833126	0.0378201	0.0220643	0.0260271	0.0241454	0
chr1:156215368-156215899*N_Shelf	1	chr1:156215368-156215899	N_Shelf	BGLAP	1.73465e-07	8.63701e-06	12	12	cg13282594	156211609	9.81612e-08	1.88627e-05	0.534849	0.579231	0.589745	-0.054896	0.0284585	0.0469994	0.026731	0
chr1:1141670-1142150*N_Shore	1	chr1:1141670-1142150	N_Shore	TNFRSF18	1.82082e-07	9.05842e-06	3	3	cg19237691	1141617	6.00535e-08	1.25678e-05	0.0710949	0.0999747	0.106087	-0.0349924	0.0227258	0.0210762	0.0146205	0
chr2:25475706-25475928*Island	2	chr2:25475706-25475928	Island	DNMT3A	1.85385e-07	9.21492e-06	3	3	cg20948740	25475726	1.2563e-08	3.32893e-06	0.457796	0.383267	0.386276	0.0715205	0.0361443	0.0394153	0.0331479	0
chr17:40118605-40119301*N_Shore	17	chr17:40118605-40119301	N_Shore	TTC25	1.86457e-07	9.24732e-06	8	8	cg05182416	40117578	1.30085e-07	2.39274e-05	0.67195	0.59431	0.613137	0.058813	0.0406578	0.0486438	0.0370583	0
chr17:40118605-40119301*N_Shore	17	chr17:40118605-40119301	N_Shore	CNP	1.86457e-07	9.24732e-06	8	8	cg05182416	40117578	1.30085e-07	2.39274e-05	0.67195	0.59431	0.613137	0.058813	0.0406578	0.0486438	0.0370583	0
chr1:3239915-3240261*Island	1	chr1:3239915-3240261	Island	PRDM16	1.90377e-07	9.42734e-06	4	4	cg03254465	3240227	1.03252e-08	2.86521e-06	0.338682	0.210588	0.238843	0.0998394	0.0594077	0.038295	0.0452681	0
chr1:10490200-10491072*N_Shore	1	chr1:10490200-10491072	N_Shore	APITD1	1.90568e-07	9.42734e-06	7	5	cg09242541	10490025	1.77994e-07	3.12706e-05	0.527089	0.42548	0.445144	0.0819449	0.0549553	0.055111	0.049621	0
chr20:45317691-45318458*N_Shore	20	chr20:45317691-45318458	N_Shore	TP53RK	1.90787e-07	9.43025e-06	3	3	cg00199059	45317219	2.96627e-08	7.00656e-06	0.510639	0.429914	0.463694	0.0469441	0.0373256	0.0486311	0.0273459	0
chr19:48216486-48216837*N_Shore	19	chr19:48216486-48216837	N_Shore	EHD2	1.95224e-07	9.6351e-06	5	5	cg26335620	48215149	6.11551e-08	1.27529e-05	0.58304	0.54679	0.557913	0.0251269	0.0307584	0.0341988	0.0280658	0
chr2:113956343-113957042*Island	2	chr2:113956343-113957042	Island	LOC440839	1.95424e-07	9.6351e-06	4	4	cg10536276	113956344	1.13131e-08	3.07445e-06	0.587609	0.435245	0.453671	0.133938	0.0712121	0.052967	0.0563467	0
chr2:113956343-113957042*Island	2	chr2:113956343-113957042	Island	PSD4	1.95424e-07	9.6351e-06	4	4	cg10536276	113956344	1.13131e-08	3.07445e-06	0.587609	0.435245	0.453671	0.133938	0.0712121	0.052967	0.0563467	0
chr19:860517-862123*N_Shore	19	chr19:860517-862123	N_Shore	CFD	1.98043e-07	9.74243e-06	8	8	cg08828286	859680	5.57409e-08	1.18462e-05	0.248069	0.195555	0.194951	0.0531177	0.0355838	0.0296994	0.0295094	0
chr17:1880789-1881116*Island	17	chr17:1880789-1881116	Island	RTN4RL1	1.99193e-07	9.77647e-06	4	4	cg05550893	1880884	5.63067e-09	1.75608e-06	0.541334	0.448613	0.429217	0.112117	0.0508399	0.0571894	0.0498292	0
chr8:102505512-102506430*Island	8	chr8:102505512-102506430	Island	GRHL2	1.9946e-07	9.77647e-06	4	4	cg03023152	102505556	1.16149e-05	0.000991608	0.0737892	0.103657	0.0889435	-0.0151543	0.0175888	0.0238944	0.0125893	0
chr16:67514398-67515345*S_Shore	16	chr16:67514398-67515345	S_Shore	AGRP	1.99567e-07	9.77647e-06	7	7	cg07871059	67516493	4.12929e-05	0.00276536	0.0804832	0.106358	0.113357	-0.0328739	0.0156424	0.0211269	0.0170845	0
chr16:67514398-67515345*S_Shore	16	chr16:67514398-67515345	S_Shore	ATP6V0D1	1.99567e-07	9.77647e-06	7	7	cg07871059	67516493	4.12929e-05	0.00276536	0.0804832	0.106358	0.113357	-0.0328739	0.0156424	0.0211269	0.0170845	0
chr19:13067585-13068152*S_Shore	19	chr19:13067585-13068152	S_Shore	GADD45GIP1	2.02252e-07	9.89699e-06	4	4	cg06192753	13068297	1.66916e-07	2.959e-05	0.144735	0.0755586	0.0865826	0.0581521	0.0359515	0.0293219	0.0186522	0
chr14:73957750-73958889*Island	14	chr14:73957750-73958889	Island	C14orf169	2.03321e-07	9.93042e-06	6	6	cg05690394	73958888	2.87225e-08	6.80271e-06	0.753412	0.708624	0.690094	0.063318	0.0321365	0.0570078	0.0349846	0
chr14:73957750-73958889*Island	14	chr14:73957750-73958889	Island	HEATR4	2.03321e-07	9.93042e-06	6	6	cg05690394	73958888	2.87225e-08	6.80271e-06	0.753412	0.708624	0.690094	0.063318	0.0321365	0.0570078	0.0349846	0
chr14:56046634-56047986*N_Shore	14	chr14:56046634-56047986	N_Shore	KTN1	2.03499e-07	9.93042e-06	4	4	cg16907514	56046098	9.23417e-08	1.79006e-05	0.484192	0.328362	0.344613	0.139579	0.084775	0.0778211	0.0466036	0
chr14:56046634-56047986*N_Shore	14	chr14:56046634-56047986	N_Shore	C14orf33	2.03499e-07	9.93042e-06	4	4	cg16907514	56046098	9.23417e-08	1.79006e-05	0.484192	0.328362	0.344613	0.139579	0.084775	0.0778211	0.0466036	0
chr16:2054011-2054288*S_Shore	16	chr16:2054011-2054288	S_Shore	ZNF598	2.05217e-07	1.00004e-05	5	5	cg26804891	2055242	0.00661232	0.123901	0.677729	0.628913	0.641568	0.0361608	0.0351294	0.0670198	0.0437556	0
chr15:82335472-82339937*Island	15	chr15:82335472-82339937	Island	MEX3B	2.06903e-07	1.00299e-05	19	19	cg09073799	82336202	3.53805e-08	8.06524e-06	0.680681	0.559487	0.55759	0.123092	0.0778719	0.0862312	0.0654162	0
chr6:31670594-31671274*N_Shore	6	chr6:31670594-31671274	N_Shore	BAT5	2.08977e-07	1.00943e-05	14	13	cg06151074	31669888	3.04234e-08	7.1384e-06	0.276075	0.201562	0.226621	0.0494538	0.0255779	0.0245718	0.023373	0
chr11:829284-833558*Island	11	chr11:829284-833558	Island	EFCAB4A	2.11495e-07	1.01825e-05	14	12	cg02261765	831170	2.07565e-08	5.15145e-06	0.328124	0.25638	0.247902	0.0802222	0.0389042	0.0514202	0.027848	0
chr6:116600494-116601174*S_Shore	6	chr6:116600494-116601174	S_Shore	TSPYL1	2.13593e-07	1.02572e-05	9	9	cg07939445	116602398	6.26343e-09	1.89637e-06	0.712416	0.624095	0.618823	0.0935927	0.0279696	0.0627169	0.0445444	0
chr6:116600494-116601174*S_Shore	6	chr6:116600494-116601174	S_Shore	DSE	2.13593e-07	1.02572e-05	9	9	cg07939445	116602398	6.26343e-09	1.89637e-06	0.712416	0.624095	0.618823	0.0935927	0.0279696	0.0627169	0.0445444	0
chr16:67233032-67233862*N_Shore	16	chr16:67233032-67233862	N_Shore	E2F4	2.1392e-07	1.02572e-05	6	6	cg07719604	67232460	1.08661e-08	2.98245e-06	0.549333	0.493455	0.508116	0.0412166	0.0386675	0.0590075	0.043018	0
chr16:67233032-67233862*N_Shore	16	chr16:67233032-67233862	N_Shore	ELMO3	2.1392e-07	1.02572e-05	6	6	cg07719604	67232460	1.08661e-08	2.98245e-06	0.549333	0.493455	0.508116	0.0412166	0.0386675	0.0590075	0.043018	0
chr17:1465159-1466312*S_Shore	17	chr17:1465159-1466312	S_Shore	PITPNA	2.18935e-07	1.0489e-05	3	3	cg11719157	1466715	1.36049e-08	3.54112e-06	0.770159	0.681233	0.685479	0.0846801	0.0342819	0.0587228	0.0420649	0
chr19:39465846-39466403*S_Shore	19	chr19:39465846-39466403	S_Shore	FBXO17	2.1946e-07	1.05028e-05	4	4	cg24010336	39467258	9.03882e-08	1.75605e-05	0.764907	0.703304	0.687212	0.0776948	0.0290516	0.0541233	0.042095	0
chr22:47069523-47069800*Island	22	chr22:47069523-47069800	Island	GRAMD4	2.21505e-07	1.0592e-05	3	3	cg09233980	47069799	6.71631e-07	9.50593e-05	0.520741	0.470268	0.481443	0.0392975	0.0265346	0.0402804	0.0281253	0
chr1:10490200-10491072*Island	1	chr1:10490200-10491072	Island	APITD1	2.23704e-07	1.06624e-05	7	7	cg09578353	10490236	6.23063e-09	1.89294e-06	0.445146	0.336595	0.345307	0.0998387	0.0497625	0.0511708	0.0384261	0
chr22:28192793-28198592*Island	22	chr22:28192793-28198592	Island	MN1	2.25899e-07	1.07118e-05	17	16	cg12872311	28196226	2.77835e-08	6.61589e-06	0.450669	0.287458	0.303566	0.147103	0.0670069	0.0564505	0.0450361	0
chr1:161129138-161129689*N_Shore	1	chr1:161129138-161129689	N_Shore	USP21	2.25955e-07	1.07118e-05	4	4	cg17017284	161128717	2.32916e-08	5.71331e-06	0.499578	0.414383	0.45134	0.0482379	0.043642	0.0544658	0.0455425	0
chr22:37414319-37416111*Island	22	chr22:37414319-37416111	Island	TST	2.27821e-07	1.07828e-05	6	6	cg08727202	37414747	1.46299e-08	3.77446e-06	0.515856	0.543282	0.553869	-0.0380127	0.0281894	0.036818	0.0231085	0
chr22:37414319-37416111*Island	22	chr22:37414319-37416111	Island	MPST	2.27821e-07	1.07828e-05	6	6	cg08727202	37414747	1.46299e-08	3.77446e-06	0.515856	0.543282	0.553869	-0.0380127	0.0281894	0.036818	0.0231085	0
chr1:2232310-2232617*N_Shore	1	chr1:2232310-2232617	N_Shore	SKI	2.28689e-07	1.08036e-05	7	7	cg23022809	2230923	5.34581e-05	0.00338724	0.707753	0.697723	0.694498	0.013255	0.0316776	0.0351178	0.0245785	0
chr18:74691262-74691466*Island	18	chr18:74691262-74691466	Island	MBP	2.30106e-07	1.08619e-05	3	3	cg15352683	74691367	1.05689e-08	2.9145e-06	0.63012	0.704174	0.707149	-0.0770287	0.0360895	0.0314778	0.0249834	0
chr13:114879041-114879530*S_Shore	13	chr13:114879041-114879530	S_Shore	RASA3	2.40154e-07	1.13119e-05	8	8	cg01811815	114881103	1.1986e-08	3.19527e-06	0.564701	0.45429	0.450275	0.114426	0.0509426	0.0703082	0.0445897	0
chr11:129871690-129873423*N_Shore	11	chr11:129871690-129873423	N_Shore	PRDM10	2.43597e-07	1.14504e-05	3	3	cg12409074	129870648	4.30463e-08	9.52918e-06	0.37657	0.298115	0.318174	0.0583962	0.052231	0.0377767	0.0515848	0
chr16:832827-833042*S_Shore	16	chr16:832827-833042	S_Shore	MSLNL	2.4368e-07	1.14504e-05	7	6	cg05831242	834043	1.45542e-08	3.76042e-06	0.517954	0.451167	0.474816	0.0431379	0.0313898	0.044319	0.021605	0
chr11:14665053-14666674*N_Shore	11	chr11:14665053-14666674	N_Shore	PSMA1	2.44737e-07	1.14848e-05	5	5	cg03439703	14664991	5.76092e-07	8.39476e-05	0.410164	0.378497	0.378924	0.0312394	0.0248199	0.0382107	0.0186946	0
chr11:14665053-14666674*N_Shore	11	chr11:14665053-14666674	N_Shore	PDE3B	2.44737e-07	1.14848e-05	5	5	cg03439703	14664991	5.76092e-07	8.39476e-05	0.410164	0.378497	0.378924	0.0312394	0.0248199	0.0382107	0.0186946	0
chr1:15250373-15251545*Island	1	chr1:15250373-15251545	Island	KIAA1026	2.46894e-07	1.15675e-05	6	6	cg21833837	15250388	8.0123e-08	1.58102e-05	0.279429	0.247995	0.251708	0.0277212	0.0218339	0.0307192	0.0142119	0
chr6:33281112-33281827*S_Shore	6	chr6:33281112-33281827	S_Shore	ZBTB22	2.49914e-07	1.16779e-05	5	5	cg24221373	33283314	3.14601e-07	5.10461e-05	0.96793	0.954312	0.945302	0.0226279	0.00675861	0.0188422	0.0117946	0
chr6:33281112-33281827*S_Shore	6	chr6:33281112-33281827	S_Shore	TAPBP	2.49914e-07	1.16779e-05	5	5	cg24221373	33283314	3.14601e-07	5.10461e-05	0.96793	0.954312	0.945302	0.0226279	0.00675861	0.0188422	0.0117946	0
chr11:134253449-134254151*S_Shore	11	chr11:134253449-134254151	S_Shore	B3GAT1	2.56146e-07	1.19407e-05	9	9	cg09447621	134254646	1.98889e-08	4.95005e-06	0.195793	0.213029	0.216271	-0.0204788	0.0557947	0.0379698	0.0461064	0
chr13:110434466-110440180*N_Shelf	13	chr13:110434466-110440180	N_Shelf	IRS2	2.56665e-07	1.19554e-05	3	3	cg12085119	110431691	3.4942e-05	0.00243366	0.409038	0.382178	0.367548	0.04149	0.041582	0.0267412	0.0279879	0
chr20:56283891-56285395*S_Shore	20	chr20:56283891-56285395	S_Shore	PMEPA1	2.6376e-07	1.22202e-05	17	16	cg26912636	56286391	6.68402e-09	2.00989e-06	0.545676	0.488221	0.501919	0.0437576	0.0337092	0.0389093	0.0330213	0
chr5:9544692-9546715*S_Shore	5	chr5:9544692-9546715	S_Shore	SNORD123	2.63807e-07	1.22202e-05	5	5	cg18334392	9547825	0.00305379	0.0726393	0.455675	0.405602	0.422189	0.0334859	0.0639558	0.0652375	0.0558636	0
chr2:85554134-85555414*N_Shore	2	chr2:85554134-85555414	N_Shore	TGOLN2	2.65595e-07	1.22933e-05	4	3	cg23404877	85553759	6.85057e-09	2.05297e-06	0.224445	0.116736	0.102602	0.121843	0.0537513	0.0550624	0.0345437	0
chr1:85513509-85514555*N_Shore	1	chr1:85513509-85514555	N_Shore	MCOLN3	2.66336e-07	1.23147e-05	4	4	cg12037450	85513124	1.09384e-06	0.000141102	0.29324	0.379974	0.346399	-0.0531594	0.0512344	0.0423137	0.0362718	0
chr6:31649081-31649373*N_Shore	6	chr6:31649081-31649373	N_Shore	LY6G5C	2.6907e-07	1.23729e-05	22	21	cg20543183	31648146	1.67688e-07	2.96672e-05	0.458379	0.497385	0.535858	-0.0774787	0.0297808	0.0345312	0.0281899	0
chr16:31225956-31228264*Island	16	chr16:31225956-31228264	Island	TRIM72	2.7058e-07	1.241e-05	12	10	cg01754713	31226334	1.13234e-08	3.07445e-06	0.392251	0.323907	0.286221	0.10603	0.0571452	0.044785	0.035378	0
chr7:150104704-150105530*N_Shore	7	chr7:150104704-150105530	N_Shore	LOC728743	2.74343e-07	1.25695e-05	4	4	cg23896514	150103902	8.39816e-08	1.64066e-05	0.254055	0.191523	0.19898	0.0550745	0.031774	0.0309601	0.0235745	0
chr4:1241412-1244111*N_Shore	4	chr4:1241412-1244111	N_Shore	CTBP1	2.77275e-07	1.26939e-05	3	3	cg17404981	1240264	5.60781e-08	1.18756e-05	0.284506	0.377189	0.35133	-0.0668234	0.0337986	0.0600845	0.0357176	0
chr14:70038108-70040302*N_Shore	14	chr14:70038108-70040302	N_Shore	C14orf162	2.83046e-07	1.29346e-05	3	3	cg00551910	70037973	3.45355e-08	7.92388e-06	0.502099	0.445193	0.445311	0.0567875	0.0489038	0.0666411	0.0603609	0
chr19:1007551-1012222*Island	19	chr19:1007551-1012222	Island	GRIN3B	2.86975e-07	1.30633e-05	17	15	cg02582520	1009172	1.00499e-08	2.80759e-06	0.784979	0.692232	0.651696	0.133283	0.0380288	0.10259	0.0758616	0
chr1:12040113-12040793*N_Shore	1	chr1:12040113-12040793	N_Shore	MFN2	2.87353e-07	1.3067e-05	4	4	cg03593358	12039985	6.91427e-09	2.06661e-06	0.191751	0.145563	0.155175	0.0365754	0.0305879	0.0319966	0.0277868	0
chr6:29691106-29692093*N_Shore	6	chr6:29691106-29692093	N_Shore	HLA-F	2.88543e-07	1.30907e-05	10	9	cg15018934	29689744	2.79541e-07	4.59498e-05	0.785331	0.702891	0.715951	0.0693794	0.0405	0.0603465	0.0505105	0
chr2:85554134-85555414*Island	2	chr2:85554134-85555414	Island	TGOLN2	2.94432e-07	1.33408e-05	6	5	cg19905587	85554135	2.1985e-08	5.41818e-06	0.168985	0.10335	0.105963	0.0630221	0.0295384	0.0216331	0.0152994	0
chr7:2185771-2186205*N_Shore	7	chr7:2185771-2186205	N_Shore	MAD1L1	2.96205e-07	1.33846e-05	7	7	cg02185182	2185550	1.00538e-08	2.80759e-06	0.308574	0.356141	0.379845	-0.0712711	0.0475595	0.0421059	0.0479401	0
chr1:3056541-3056772*Island	1	chr1:3056541-3056772	Island	PRDM16	2.96388e-07	1.33846e-05	6	6	cg17033287	3056542	4.7812e-08	1.03756e-05	0.602819	0.543231	0.56692	0.0358995	0.0233405	0.034615	0.0214327	0
chr11:65341620-65342501*N_Shore	11	chr11:65341620-65342501	N_Shore	FAM89B	3.00103e-07	1.3542e-05	3	3	cg22986597	65341001	1.09344e-08	2.99653e-06	0.333309	0.245898	0.277259	0.0560502	0.0336515	0.0421596	0.0297183	0
chr5:142782071-142785071*N_Shore	5	chr5:142782071-142785071	N_Shore	NR3C1	3.02189e-07	1.36152e-05	6	6	cg18998365	142781532	7.02664e-06	0.000658575	0.635474	0.538033	0.531511	0.103963	0.0403251	0.052395	0.0382125	0
chr11:1315467-1317115*S_Shelf	11	chr11:1315467-1317115	S_Shelf	TOLLIP	3.13347e-07	1.40855e-05	10	9	cg06264922	1319648	2.19712e-06	0.000250911	0.723517	0.681284	0.690344	0.0331736	0.0256336	0.0495172	0.0204552	0
chr22:39715473-39715945*N_Shelf	22	chr22:39715473-39715945	N_Shelf	RPL3	3.17365e-07	1.42244e-05	9	8	cg21941821	39712633	8.3395e-08	1.63279e-05	0.243655	0.193483	0.206201	0.0374547	0.0330517	0.0302885	0.0222011	0
chr22:39715473-39715945*N_Shelf	22	chr22:39715473-39715945	N_Shelf	SNORD83A	3.17365e-07	1.42244e-05	9	8	cg21941821	39712633	8.3395e-08	1.63279e-05	0.243655	0.193483	0.206201	0.0374547	0.0330517	0.0302885	0.0222011	0
chr1:894313-902654*Island	1	chr1:894313-902654	Island	KLHL17	3.20122e-07	1.42244e-05	35	34	cg00328058	901062	9.91401e-08	1.90093e-05	0.640309	0.58459	0.591511	0.048798	0.0342503	0.0550388	0.026306	0
chr1:894313-902654*Island	1	chr1:894313-902654	Island	PLEKHN1	3.20122e-07	1.42244e-05	35	34	cg00328058	901062	9.91401e-08	1.90093e-05	0.640309	0.58459	0.591511	0.048798	0.0342503	0.0550388	0.026306	0
chr6:33084740-33084995*S_Shore	6	chr6:33084740-33084995	S_Shore	HLA-DPB2	3.20716e-07	1.42244e-05	11	11	cg13904130	33085736	4.33388e-07	6.62915e-05	0.239353	0.292872	0.297977	-0.0586242	0.0348638	0.0360065	0.0335703	0
chr3:28282826-28283457*N_Shore	3	chr3:28282826-28283457	N_Shore	CMC1	3.23158e-07	1.43219e-05	3	3	cg13679679	28282245	5.97042e-08	1.25245e-05	0.571141	0.404639	0.47519	0.0959515	0.0500492	0.0538715	0.0582102	0
chr7:150710349-150711333*Island	7	chr7:150710349-150711333	Island	ATG9B	3.2602e-07	1.44379e-05	3	3	cg02027878	150711138	7.78749e-09	2.27192e-06	0.448128	0.338777	0.323014	0.125114	0.0530081	0.0627572	0.0363712	0
chr7:150710349-150711333*Island	7	chr7:150710349-150711333	Island	NOS3	3.2602e-07	1.44379e-05	3	3	cg02027878	150711138	7.78749e-09	2.27192e-06	0.448128	0.338777	0.323014	0.125114	0.0530081	0.0627572	0.0363712	0
chr2:71131200-71132256*Island	2	chr2:71131200-71132256	Island	VAX2	3.27256e-07	1.44744e-05	5	5	cg14265704	71131201	8.09228e-07	0.000110368	0.388107	0.467522	0.443337	-0.0552297	0.0294142	0.0575401	0.0280973	0
chr19:1354420-1355350*S_Shore	19	chr19:1354420-1355350	S_Shore	MUM1	3.31694e-07	1.46193e-05	11	11	cg08149682	1355918	0.00182897	0.0506338	0.220259	0.214578	0.22593	-0.00567057	0.0428346	0.0313945	0.0443974	0
chr10:103603166-103603642*S_Shore	10	chr10:103603166-103603642	S_Shore	KCNIP2	3.35312e-07	1.47566e-05	6	6	cg13252968	103604222	2.56403e-08	6.15544e-06	0.351959	0.295049	0.295219	0.0567407	0.0358874	0.0475394	0.0296481	0
chr2:219263098-219265556*S_Shore	2	chr2:219263098-219265556	S_Shore	CTDSP1	3.38933e-07	1.489e-05	7	7	cg27291385	219266135	5.49804e-08	1.17432e-05	0.384007	0.31615	0.347101	0.0369065	0.0341236	0.0573191	0.0426764	0
chr2:219263098-219265556*S_Shore	2	chr2:219263098-219265556	S_Shore	MIR26B	3.38933e-07	1.489e-05	7	7	cg27291385	219266135	5.49804e-08	1.17432e-05	0.384007	0.31615	0.347101	0.0369065	0.0341236	0.0573191	0.0426764	0
chr13:20989007-20989836*Island	13	chr13:20989007-20989836	Island	CRYL1	3.4958e-07	1.53386e-05	5	5	cg19159759	20989818	1.41714e-05	0.00116451	0.808819	0.757811	0.729728	0.0790912	0.0437979	0.0956107	0.0603616	0
chr22:39638219-39640966*N_Shelf	22	chr22:39638219-39640966	N_Shelf	PDGFB	3.58243e-07	1.5707e-05	3	3	cg20773033	39635187	1.16413e-08	3.13179e-06	0.780804	0.653823	0.700573	0.0802309	0.0336156	0.0554804	0.0509979	0
chr2:1163016-1163820*S_Shelf	2	chr2:1163016-1163820	S_Shelf	SNTG2	3.59819e-07	1.57643e-05	3	3	cg00206271	1166205	2.38125e-06	0.000269494	0.869456	0.814043	0.817168	0.052288	0.0185771	0.0496806	0.0324537	0
chr3:52255365-52255763*S_Shore	3	chr3:52255365-52255763	S_Shore	TLR9	3.60703e-07	1.57913e-05	3	3	cg23021329	52256186	1.15856e-08	3.12159e-06	0.245577	0.300387	0.302736	-0.0571592	0.0243184	0.0360664	0.0187596	0
chr1:47902793-47905518*Island	1	chr1:47902793-47905518	Island	FOXD2	3.62592e-07	1.58307e-05	12	11	cg14513071	47905517	1.73289e-08	4.39992e-06	0.490814	0.613851	0.576557	-0.085743	0.0403461	0.0386764	0.0473512	0
chr16:67969290-67970418*Island	16	chr16:67969290-67970418	Island	PSMB10	3.68484e-07	1.60482e-05	7	7	cg21445230	67969367	4.18687e-08	9.32709e-06	0.359178	0.309574	0.31426	0.0449172	0.0297469	0.0347039	0.0229603	0
chr1:3623318-3623521*S_Shore	1	chr1:3623318-3623521	S_Shore	TP73	3.74233e-07	1.62719e-05	6	6	cg26105278	3624054	3.93024e-08	8.82232e-06	0.275259	0.229158	0.22376	0.0514995	0.0219827	0.0295311	0.0233287	0
chr12:133135293-133135722*N_Shore	12	chr12:133135293-133135722	N_Shore	FBRSL1	3.74638e-07	1.62719e-05	5	5	cg24906420	133133512	1.5537e-08	3.97356e-06	0.394504	0.439088	0.454546	-0.0600425	0.0302623	0.0389557	0.0286403	0
chr10:75006629-75007184*N_Shore	10	chr10:75006629-75007184	N_Shore	DNAJC9	3.77872e-07	1.64003e-05	3	3	cg04197548	75004945	2.99258e-07	4.87813e-05	0.37566	0.303551	0.297134	0.0785259	0.041136	0.052579	0.0259179	0
chr16:89167116-89167482*N_Shelf	16	chr16:89167116-89167482	N_Shelf	ACSF3	3.81178e-07	1.65153e-05	7	7	cg02691035	89163800	1.51169e-05	0.0012298	0.311973	0.431533	0.408317	-0.0963437	0.0482435	0.0502224	0.0420663	0
chr8:145725460-145726707*Island	8	chr8:145725460-145726707	Island	PPP1R16A	3.81713e-07	1.65182e-05	5	5	cg21925748	145725509	1.24365e-08	3.30037e-06	0.654419	0.59761	0.563463	0.090956	0.0344775	0.0470212	0.0542709	0
chr10:105253191-105254428*N_Shore	10	chr10:105253191-105254428	N_Shore	NEURL	3.85632e-07	1.66755e-05	3	3	cg00351443	105252720	1.28025e-05	0.0010712	0.428209	0.438912	0.460565	-0.032356	0.0259878	0.0414922	0.0307271	0
chr19:1265854-1269943*Island	19	chr19:1265854-1269943	Island	C19orf23	3.93968e-07	1.69901e-05	12	11	cg04581214	1267741	9.54923e-07	0.000126708	0.217954	0.176103	0.180097	0.0378574	0.0252879	0.0288374	0.0160485	0
chr12:131356094-131357228*N_Shore	12	chr12:131356094-131357228	N_Shore	RAN	3.94798e-07	1.70134e-05	4	3	cg17629322	131355424	4.11115e-06	0.000422409	0.878139	0.84728	0.848932	0.0292071	0.0264927	0.026791	0.0202854	0
chr8:117778487-117779146*N_Shore	8	chr8:117778487-117779146	N_Shore	UTP23	3.97463e-07	1.71115e-05	4	4	cg09305680	117778069	9.55944e-08	1.84297e-05	0.442945	0.351928	0.399941	0.0430039	0.0603522	0.0617736	0.0590545	0
chr1:178693968-178695075*N_Shore	1	chr1:178693968-178695075	N_Shore	RALGPS2	4.02275e-07	1.7306e-05	3	3	cg06788278	178693891	4.81733e-07	7.25415e-05	0.43652	0.373494	0.381012	0.0555072	0.0342343	0.0357876	0.0313349	0
chr17:74135922-74137802*S_Shore	17	chr17:74135922-74137802	S_Shore	FOXJ1	4.02915e-07	1.73166e-05	4	4	cg16672637	74138356	1.0049e-08	2.80759e-06	0.474896	0.424125	0.444166	0.0307301	0.0374269	0.045505	0.0404108	0
chr22:39715473-39715945*N_Shore	22	chr22:39715473-39715945	N_Shore	RPL3	4.07009e-07	1.74585e-05	8	8	cg21649604	39714288	0.000340747	0.0144788	0.241211	0.199249	0.214189	0.0270224	0.0290323	0.0304319	0.0194624	0
chr22:39715473-39715945*N_Shore	22	chr22:39715473-39715945	N_Shore	RNU86	4.07009e-07	1.74585e-05	8	8	cg21649604	39714288	0.000340747	0.0144788	0.241211	0.199249	0.214189	0.0270224	0.0290323	0.0304319	0.0194624	0
chr12:49782965-49783193*Island	12	chr12:49782965-49783193	Island	SPATS2	4.08902e-07	1.75226e-05	4	4	cg21579107	49783192	9.60292e-09	2.71612e-06	0.734749	0.620637	0.62217	0.112579	0.0565841	0.101367	0.0517176	0
chr11:315739-316539*N_Shelf	11	chr11:315739-316539	N_Shelf	IFITM1	4.28978e-07	1.83695e-05	3	3	cg20566897	313527	1.02178e-08	2.84887e-06	0.344852	0.437042	0.427829	-0.0829765	0.0449802	0.0503992	0.0371052	0
chr12:6309152-6310392*N_Shore	12	chr12:6309152-6310392	N_Shore	CD9	4.32258e-07	1.84965e-05	3	3	cg22222281	6308758	2.53002e-08	6.0904e-06	0.362577	0.439711	0.482127	-0.119551	0.0766211	0.0691959	0.0632561	0
chr6:33048416-33048814*N_Shore	6	chr6:33048416-33048814	N_Shore	HLA-DPB1	4.36217e-07	1.86252e-05	10	9	cg15734436	33047185	3.05087e-05	0.00217475	0.759837	0.711582	0.723348	0.0364888	0.0275395	0.0403913	0.0321252	0
chr22:46067451-46068490*N_Shore	22	chr22:46067451-46068490	N_Shore	ATXN10	4.44503e-07	1.89469e-05	3	3	cg20269537	46067074	6.88883e-08	1.4001e-05	0.415993	0.355421	0.373382	0.0426109	0.0272475	0.0487423	0.0216344	0
chr8:10586613-10586886*Island	8	chr8:10586613-10586886	Island	SOX7	4.56151e-07	1.94245e-05	4	4	cg20671920	10586678	1.09966e-08	3.00888e-06	0.161958	0.239695	0.248281	-0.0863229	0.0303196	0.0415439	0.0394439	0
chr19:2095395-2095727*Island	19	chr19:2095395-2095727	Island	MOBKL2A	4.79928e-07	2.04222e-05	3	3	cg13689560	2095643	2.49962e-08	6.04127e-06	0.216766	0.0804563	0.0898952	0.126871	0.0581125	0.0379431	0.0340518	0
chr19:2095395-2095727*Island	19	chr19:2095395-2095727	Island	C19orf36	4.79928e-07	2.04222e-05	3	3	cg13689560	2095643	2.49962e-08	6.04127e-06	0.216766	0.0804563	0.0898952	0.126871	0.0581125	0.0379431	0.0340518	0
chr14:104193901-104194627*N_Shelf	14	chr14:104193901-104194627	N_Shelf	ZFYVE21	4.87229e-07	2.06745e-05	6	6	cg26242531	104190678	3.98911e-07	6.22506e-05	0.401634	0.321209	0.35468	0.0469542	0.0393138	0.0457291	0.0484578	0
chr10:104191984-104192527*S_Shelf	10	chr10:104191984-104192527	S_Shelf	MIR146B	4.8738e-07	2.06745e-05	7	7	cg09701700	104194843	0.00101488	0.0330573	0.270482	0.32673	0.340691	-0.0702087	0.0409074	0.0464645	0.0356345	0
chr22:38082302-38082796*N_Shore	22	chr22:38082302-38082796	N_Shore	NOL12	4.90949e-07	2.08008e-05	5	5	cg14398464	38082108	7.82001e-08	1.55298e-05	0.437061	0.379925	0.412766	0.0242955	0.03192	0.042658	0.0317101	0
chr8:145027911-145028352*S_Shore	8	chr8:145027911-145028352	S_Shore	PLEC1	4.91878e-07	2.08201e-05	4	4	cg21535931	145029603	3.03012e-08	7.12871e-06	0.447012	0.588547	0.586616	-0.139603	0.0650014	0.0611658	0.0487268	0
chr16:122017-122873*S_Shore	16	chr16:122017-122873	S_Shore	RHBDF1	4.96224e-07	2.09789e-05	5	5	cg04995976	123246	2.82847e-06	0.000311505	0.749778	0.689449	0.700622	0.0491559	0.0229715	0.0383526	0.0176678	0
chr20:62492849-62494249*N_Shore	20	chr20:62492849-62494249	N_Shore	C20orf135	5.05019e-07	2.12844e-05	6	6	cg23166392	62492380	2.13536e-08	5.28474e-06	0.502628	0.422593	0.410883	0.091745	0.042634	0.0385129	0.0272447	0
chr6:30457369-30458175*S_Shore	6	chr6:30457369-30458175	S_Shore	HLA-E	5.08952e-07	2.13836e-05	14	13	cg05201185	30459139	1.74466e-08	4.41073e-06	0.598902	0.502204	0.52237	0.0765318	0.0374235	0.0654814	0.0360716	0
chr6:30523286-30523519*N_Shore	6	chr6:30523286-30523519	N_Shore	PRR3	5.15007e-07	2.1566e-05	14	14	cg04273431	30523215	3.67699e-08	8.33883e-06	0.669267	0.581459	0.580557	0.0887099	0.0248211	0.0476593	0.0426452	0
chr6:30523286-30523519*N_Shore	6	chr6:30523286-30523519	N_Shore	GNL1	5.15007e-07	2.1566e-05	14	14	cg04273431	30523215	3.67699e-08	8.33883e-06	0.669267	0.581459	0.580557	0.0887099	0.0248211	0.0476593	0.0426452	0
chr12:125002006-125002433*Island	12	chr12:125002006-125002433	Island	NCOR2	5.27454e-07	2.20715e-05	3	3	cg01054110	125002332	1.54053e-07	2.75684e-05	0.958285	0.812606	0.878936	0.0793484	0.0147252	0.0900123	0.0491389	0
chr10:123356616-123358285*N_Shore	10	chr10:123356616-123358285	N_Shore	FGFR2	5.43203e-07	2.26499e-05	9	9	cg11430259	123355748	1.95645e-05	0.00151671	0.116714	0.237964	0.225565	-0.108852	0.0502524	0.117109	0.123883	0
chr1:228353108-228353986*N_Shore	1	chr1:228353108-228353986	N_Shore	C1orf69	5.50536e-07	2.29394e-05	3	3	cg24854606	228352940	1.0405e-07	1.98214e-05	0.230753	0.171125	0.183315	0.0474383	0.0363402	0.0292035	0.0242684	0
chr2:63281034-63281347*N_Shore	2	chr2:63281034-63281347	N_Shore	OTX1	5.5395e-07	2.30435e-05	7	7	cg10271192	63279645	3.49898e-08	7.99687e-06	0.242045	0.266211	0.262049	-0.0200037	0.0356881	0.0295422	0.0310831	0
chr14:55878302-55878681*S_Shore	14	chr14:55878302-55878681	S_Shore	KIAA0831	5.5764e-07	2.31751e-05	4	4	cg00917437	55879046	1.34545e-08	3.50715e-06	0.370179	0.304524	0.314226	0.0559527	0.0360541	0.0443288	0.0279029	0
chr17:17109893-17110296*Island	17	chr17:17109893-17110296	Island	PLD6	5.59566e-07	2.31875e-05	5	5	cg16340422	17110120	1.88164e-06	0.000223277	0.756949	0.656538	0.643951	0.112998	0.0702716	0.130781	0.10029	0
chr17:6945389-6947521*Island	17	chr17:6945389-6947521	Island	SLC16A11	5.60571e-07	2.31875e-05	15	15	cg01019875	6945620	3.49307e-08	7.99687e-06	0.114685	0.0706985	0.0595877	0.0550973	0.0297362	0.0209871	0.0194397	0
chr19:39339923-39343257*S_Shore	19	chr19:39339923-39343257	S_Shore	HNRNPL	5.66206e-07	2.33986e-05	4	4	cg16464322	39343574	3.71067e-08	8.38284e-06	0.296039	0.236892	0.257034	0.0390052	0.0307086	0.0336507	0.0258904	0
chr17:80740534-80740929*Island	17	chr17:80740534-80740929	Island	TBCD	5.77389e-07	2.3844e-05	3	3	cg19173666	80740808	1.54897e-08	3.96723e-06	0.399634	0.456675	0.470811	-0.071177	0.0342227	0.0393417	0.0428196	0
chr15:65394413-65395041*Island	15	chr15:65394413-65395041	Island	LOC390595	5.83292e-07	2.40652e-05	4	4	cg13985132	65394414	7.02828e-08	1.42188e-05	0.817422	0.864746	0.872672	-0.0552499	0.0362034	0.0586769	0.0237039	0
chr14:85996494-85996958*N_Shore	14	chr14:85996494-85996958	N_Shore	FLRT2	5.87196e-07	2.4164e-05	11	11	cg23934295	85995655	2.54277e-08	6.11275e-06	0.348451	0.239097	0.246306	0.102144	0.0546951	0.0467829	0.0391542	0
chr1:10057121-10058108*N_Shore	1	chr1:10057121-10058108	N_Shore	RBP7	5.93885e-07	2.43415e-05	5	4	cg03406535	10056957	5.42525e-07	7.9467e-05	0.192572	0.151288	0.161939	0.0306331	0.030102	0.0267808	0.0251144	0
chr6:32121829-32122529*N_Shore	6	chr6:32121829-32122529	N_Shore	PPT2	5.97726e-07	2.43415e-05	44	41	cg01111041	32121055	8.2014e-08	1.61112e-05	0.395513	0.329264	0.351967	0.0435458	0.0356361	0.0514866	0.0307904	0
chr6:32121829-32122529*N_Shore	6	chr6:32121829-32122529	N_Shore	PRRT1	5.97726e-07	2.43415e-05	44	41	cg01111041	32121055	8.2014e-08	1.61112e-05	0.395513	0.329264	0.351967	0.0435458	0.0356361	0.0514866	0.0307904	0
chr20:30639908-30640786*N_Shore	20	chr20:30639908-30640786	N_Shore	HCK	6.03577e-07	2.45277e-05	3	3	cg02311725	30639816	4.44934e-08	9.83718e-06	0.204553	0.239311	0.232984	-0.0284316	0.0382593	0.0304399	0.0253841	0
chr1:16693621-16694270*N_Shore	1	chr1:16693621-16694270	N_Shore	C1orf144	6.03931e-07	2.45277e-05	4	4	cg01467503	16692150	1.81659e-07	3.18462e-05	0.658031	0.607555	0.617261	0.0407697	0.0283451	0.0451042	0.040444	0
chr2:179344852-179345483*N_Shore	2	chr2:179344852-179345483	N_Shore	MIR548N	6.03968e-07	2.45277e-05	5	5	cg24560920	179344387	3.37697e-08	7.76841e-06	0.717655	0.654927	0.653023	0.0646319	0.0557485	0.0616892	0.0566025	0
chr2:179344852-179345483*N_Shore	2	chr2:179344852-179345483	N_Shore	FKBP7	6.03968e-07	2.45277e-05	5	5	cg24560920	179344387	3.37697e-08	7.76841e-06	0.717655	0.654927	0.653023	0.0646319	0.0557485	0.0616892	0.0566025	0
chr2:179344852-179345483*N_Shore	2	chr2:179344852-179345483	N_Shore	PLEKHA3	6.03968e-07	2.45277e-05	5	5	cg24560920	179344387	3.37697e-08	7.76841e-06	0.717655	0.654927	0.653023	0.0646319	0.0557485	0.0616892	0.0566025	0
chr11:63997662-63998412*N_Shore	11	chr11:63997662-63998412	N_Shore	DNAJC4	6.26893e-07	2.54353e-05	4	4	cg03236948	63997492	4.19322e-07	6.45525e-05	0.361102	0.280387	0.294238	0.0668633	0.0371978	0.0381262	0.0355207	0
chr14:24868163-24868590*N_Shore	14	chr14:24868163-24868590	N_Shore	NYNRIN	6.27659e-07	2.54371e-05	5	5	cg12890903	24867954	8.25919e-05	0.00480793	0.233969	0.232903	0.25328	-0.019311	0.0355293	0.0334741	0.0324956	0
chr4:145566242-145567413*S_Shore	4	chr4:145566242-145567413	S_Shore	HHIP	6.41424e-07	2.59591e-05	7	6	cg15319311	145568991	4.14563e-08	9.24858e-06	0.297686	0.182334	0.178983	0.118702	0.0534062	0.0591512	0.0344177	0
chr17:42295861-42299719*Island	17	chr17:42295861-42299719	Island	UBTF	6.55032e-07	2.63826e-05	22	21	cg24239014	42299698	7.17011e-07	0.000100115	0.0506267	0.028839	0.0276051	0.0230216	0.0202139	0.00778126	0.00828939	0
chr6:137365299-137366126*Island	6	chr6:137365299-137366126	Island	IL20RA	6.9805e-07	2.80896e-05	4	4	cg04481779	137366125	4.56175e-08	1.00103e-05	0.315778	0.374923	0.373591	-0.0578127	0.0273345	0.0568292	0.0297622	0
chr13:111301316-111301593*N_Shelf	13	chr13:111301316-111301593	N_Shelf	CARS2	7.02755e-07	2.82595e-05	3	3	cg03734594	111297400	2.84819e-06	0.00031309	0.243241	0.367256	0.34181	-0.0985687	0.0596362	0.0636302	0.0568153	0
chr6:32806284-32806669*S_Shore	6	chr6:32806284-32806669	S_Shore	PSMB8	7.07352e-07	2.83344e-05	19	17	cg25693349	32808596	6.31136e-07	9.01972e-05	0.217517	0.291494	0.277033	-0.0595164	0.0253331	0.0428485	0.0377208	0
chr9:139617622-139618131*N_Shore	9	chr9:139617622-139618131	N_Shore	FAM69B	7.09379e-07	2.83898e-05	4	4	cg13587908	139616233	1.97882e-06	0.000232103	0.356805	0.330506	0.352485	0.00431981	0.0265162	0.0352374	0.0325588	0
chr15:72564442-72565165*N_Shore	15	chr15:72564442-72565165	N_Shore	PARP6	7.23158e-07	2.89084e-05	5	5	cg23331961	72564179	3.26008e-05	0.00229418	0.655586	0.62638	0.636662	0.0189236	0.0356391	0.0571984	0.0279903	0
chr11:2905023-2907024*S_Shore	11	chr11:2905023-2907024	S_Shore	CDKN1C	7.35686e-07	2.93427e-05	11	10	cg05267118	2907884	6.33922e-08	1.30954e-05	0.463603	0.403421	0.417543	0.0460603	0.0291181	0.0436119	0.0287226	0
chr2:1746833-1748971*Island	2	chr2:1746833-1748971	Island	PXDN	7.43974e-07	2.95729e-05	11	11	cg01805732	1748970	4.00791e-07	6.24437e-05	0.305275	0.230656	0.215115	0.0901598	0.0500212	0.0533301	0.0441511	0
chr4:681313-681514*S_Shore	4	chr4:681313-681514	S_Shore	MFSD7	7.57536e-07	3.00916e-05	3	3	cg17952262	683240	1.69094e-08	4.2996e-06	0.243806	0.266643	0.282122	-0.0383161	0.0439694	0.0319691	0.0361419	0
chr1:2559892-2561055*S_Shelf	1	chr1:2559892-2561055	S_Shelf	MMEL1	7.65534e-07	3.0375e-05	5	5	cg20776977	2564584	4.6276e-08	1.0092e-05	0.397197	0.353299	0.355115	0.0420823	0.0311904	0.0418417	0.0262878	0
chr13:113633843-113634065*N_Shelf	13	chr13:113633843-113634065	N_Shelf	MCF2L	7.88674e-07	3.1251e-05	6	6	cg25745937	113630173	3.27866e-08	7.62119e-06	0.619994	0.669788	0.674922	-0.0549272	0.0269836	0.0282655	0.0204872	0
chr13:28674227-28675170*N_Shore	13	chr13:28674227-28675170	N_Shore	FLT3	7.91656e-07	3.1348e-05	3	3	cg26472910	28673762	2.6211e-08	6.27537e-06	0.311552	0.196925	0.198626	0.112926	0.0661272	0.0370632	0.0372733	0
chr22:50220118-50220822*N_Shore	22	chr22:50220118-50220822	N_Shore	BRD1	7.99978e-07	3.16349e-05	6	6	cg16001335	50219912	2.92509e-08	6.91857e-06	0.472643	0.601181	0.606519	-0.133875	0.0425303	0.0552055	0.0533881	0
chr1:1709394-1710582*S_Shore	1	chr1:1709394-1710582	S_Shore	NADK	8.02609e-07	3.17175e-05	3	3	cg17266431	1711069	2.50592e-06	0.000279829	0.511206	0.525971	0.538467	-0.0272612	0.0388715	0.0385631	0.0328543	0
chr3:47050486-47051609*Island	3	chr3:47050486-47051609	Island	NBEAL2	8.07743e-07	3.18918e-05	4	4	cg13451127	47050803	3.94427e-07	6.17798e-05	0.401449	0.314562	0.276779	0.12467	0.0540211	0.0431542	0.0486514	0
chr4:71859158-71859884*N_Shore	4	chr4:71859158-71859884	N_Shore	DCK	8.25119e-07	3.25414e-05	5	5	cg03461399	71858891	5.32083e-07	7.81976e-05	0.413856	0.314914	0.333745	0.0801109	0.055766	0.0620392	0.0358809	0
chr3:44596535-44597018*S_Shore	3	chr3:44596535-44597018	S_Shore	ZNF167	8.42688e-07	3.3212e-05	3	3	cg02643835	44598699	6.40816e-08	1.32223e-05	0.733392	0.786338	0.794757	-0.0613644	0.0286503	0.0236272	0.0268004	0
chr7:1937738-1937946*S_Shore	7	chr7:1937738-1937946	S_Shore	MAD1L1	8.79383e-07	3.46272e-05	4	4	cg08176258	1938450	6.7061e-08	1.37087e-05	0.526422	0.629143	0.648903	-0.122481	0.0395094	0.0378053	0.0481486	0
chr10:134755663-134756852*N_Shelf	10	chr10:134755663-134756852	N_Shelf	C10orf93	8.85235e-07	3.47567e-05	5	5	cg13289827	134752472	1.00749e-05	0.000883627	0.468334	0.510106	0.514754	-0.0464198	0.0288228	0.0406442	0.0293638	0
chr19:1998800-1999332*Island	19	chr19:1998800-1999332	Island	BTBD2	8.94764e-07	3.50996e-05	4	4	cg22551942	1999167	5.533e-08	1.17893e-05	0.477832	0.634827	0.622048	-0.144217	0.0753449	0.0755545	0.0623744	0
chr2:27440128-27440786*N_Shore	2	chr2:27440128-27440786	N_Shore	C2orf28	8.97273e-07	3.51212e-05	4	4	cg09947274	27439915	5.90306e-08	1.24127e-05	0.720023	0.674512	0.674561	0.0454623	0.0267087	0.0477509	0.0212017	0
chr2:27440128-27440786*N_Shore	2	chr2:27440128-27440786	N_Shore	CAD	8.97273e-07	3.51212e-05	4	4	cg09947274	27439915	5.90306e-08	1.24127e-05	0.720023	0.674512	0.674561	0.0454623	0.0267087	0.0477509	0.0212017	0
chr12:53715133-53715516*S_Shore	12	chr12:53715133-53715516	S_Shore	AAAS	8.97748e-07	3.51212e-05	5	5	cg10448052	53715787	1.52333e-07	2.73626e-05	0.175154	0.120923	0.144165	0.0309885	0.0363708	0.02794	0.0267825	0
chr16:53468284-53469209*N_Shore	16	chr16:53468284-53469209	N_Shore	RBL2	8.98106e-07	3.51212e-05	5	5	cg00000029	53468112	5.00434e-08	1.08332e-05	0.543214	0.45723	0.474081	0.0691327	0.0595331	0.068916	0.0463198	0
chr17:37783314-37783919*S_Shore	17	chr17:37783314-37783919	S_Shore	PPP1R1B	9.10917e-07	3.55748e-05	6	6	cg06068801	37784711	6.73803e-07	9.52137e-05	0.639925	0.581821	0.586615	0.05331	0.03524	0.0533619	0.0441214	0
chr13:53191405-53191872*N_Shore	13	chr13:53191405-53191872	N_Shore	HNRNPA1L2	9.42048e-07	3.67662e-05	3	3	cg02215357	53191046	1.33416e-07	2.45145e-05	0.211052	0.134608	0.146046	0.0650052	0.0406085	0.0300327	0.0279297	0
chr3:57741925-57742990*S_Shore	3	chr3:57741925-57742990	S_Shore	SLMAP	9.5718e-07	3.73072e-05	7	6	cg03534375	57743163	2.52217e-07	4.20865e-05	0.617802	0.543014	0.525246	0.0925564	0.0388931	0.0686604	0.0581097	0
chr9:97766649-97767955*Island	9	chr9:97766649-97767955	Island	C9orf3	9.60023e-07	3.73519e-05	4	4	cg03456213	97767954	2.38441e-07	4.01299e-05	0.168136	0.219992	0.214284	-0.0461475	0.0395322	0.0374822	0.0417993	0
chr1:27683277-27683590*N_Shore	1	chr1:27683277-27683590	N_Shore	MAP3K6	9.62823e-07	3.73611e-05	3	3	cg23989110	27683139	3.32948e-08	7.68927e-06	0.772297	0.702985	0.681504	0.0907932	0.0415731	0.0539791	0.0458376	0
chr19:1103722-1105758*Island	19	chr19:1103722-1105758	Island	GPX4	9.64078e-07	3.73611e-05	15	15	cg01613691	1105380	1.27092e-07	2.34502e-05	0.549852	0.471336	0.475208	0.0746441	0.0446288	0.0439948	0.0355425	0
chr16:66969499-66969878*Island	16	chr16:66969499-66969878	Island	CES2	9.83141e-07	3.80413e-05	4	4	cg18607308	66969500	8.49527e-06	0.00076846	0.458387	0.413406	0.414815	0.0435717	0.029596	0.038058	0.0274277	0
chr16:66969499-66969878*Island	16	chr16:66969499-66969878	Island	FAM96B	9.83141e-07	3.80413e-05	4	4	cg18607308	66969500	8.49527e-06	0.00076846	0.458387	0.413406	0.414815	0.0435717	0.029596	0.038058	0.0274277	0
chr9:115512611-115513757*Island	9	chr9:115512611-115513757	Island	SNX30	9.8636e-07	3.8124e-05	5	5	cg26386402	115512612	6.27325e-08	1.29866e-05	0.176588	0.134754	0.129301	0.0472869	0.0248041	0.0269005	0.0203945	0
chr17:17685016-17687240*N_Shore	17	chr17:17685016-17687240	N_Shore	SMCR5	9.9418e-07	3.8401e-05	4	3	cg00790307	17684042	5.31367e-06	0.000521921	0.524717	0.4826	0.49945	0.0252662	0.0344848	0.0447355	0.0332132	0
chr17:17685016-17687240*N_Shore	17	chr17:17685016-17687240	N_Shore	RAI1	9.9418e-07	3.8401e-05	4	3	cg00790307	17684042	5.31367e-06	0.000521921	0.524717	0.4826	0.49945	0.0252662	0.0344848	0.0447355	0.0332132	0
chr6:36164132-36165205*S_Shore	6	chr6:36164132-36165205	S_Shore	BRPF3	1.00253e-06	3.86982e-05	3	3	cg13719287	36165617	8.39862e-07	0.000113231	0.501951	0.422375	0.424263	0.0776878	0.0436116	0.052182	0.0375467	0
chr7:1097405-1097953*N_Shelf	7	chr7:1097405-1097953	N_Shelf	C7orf50	1.04087e-06	4.0103e-05	7	7	cg11360546	1094263	6.92363e-06	0.000650678	0.775058	0.718028	0.733382	0.0416766	0.0300716	0.0663615	0.0365738	0
chr11:117747102-117747717*S_Shore	11	chr11:117747102-117747717	S_Shore	FXYD6	1.04325e-06	4.0103e-05	12	12	cg20652899	117747940	3.09472e-08	7.24201e-06	0.507035	0.612286	0.626874	-0.119839	0.0567939	0.0857476	0.0493423	0
chr12:58129828-58130361*Island	12	chr12:58129828-58130361	Island	AGAP2	1.04632e-06	4.01945e-05	3	3	cg23377551	58130154	2.08846e-05	0.00159587	0.761411	0.734524	0.724742	0.0366689	0.0285898	0.051527	0.0233793	0
chr21:46850573-46850841*Island	21	chr21:46850573-46850841	Island	COL18A1	1.08098e-06	4.14899e-05	4	4	cg24483767	46850840	0.0031003	0.073371	0.759848	0.783597	0.789401	-0.029553	0.0274212	0.0275846	0.020166	0
chr14:33402094-33404079*S_Shelf	14	chr14:33402094-33404079	S_Shelf	NPAS3	1.09118e-06	4.1845e-05	4	4	cg10727171	33407334	0.000249796	0.0114003	0.154818	0.269681	0.25152	-0.0967025	0.0393567	0.106305	0.106784	0
chr19:39694476-39694994*S_Shore	19	chr19:39694476-39694994	S_Shore	SYCN	1.1317e-06	4.33424e-05	6	6	cg16745596	39695801	2.36764e-07	3.99238e-05	0.367173	0.267732	0.308769	0.0584034	0.0653441	0.0515255	0.0511711	0
chr11:6632879-6633787*Island	11	chr11:6632879-6633787	Island	TAF10	1.1366e-06	4.34354e-05	11	10	cg27560292	6632884	1.03244e-06	0.00013486	0.43685	0.384093	0.398313	0.0385374	0.0288979	0.0354251	0.0192573	0
chr2:287353-290099*Island	2	chr2:287353-290099	Island	FAM150B	1.14242e-06	4.3554e-05	11	11	cg18208842	287395	2.97182e-06	0.000323651	0.115941	0.15341	0.153462	-0.0375213	0.0598871	0.0452072	0.0453808	0
chr17:79006584-79006835*Island	17	chr17:79006584-79006835	Island	FLJ90757	1.16067e-06	4.42211e-05	3	3	cg00472520	79006834	1.38743e-07	2.53269e-05	0.494182	0.543409	0.564426	-0.070244	0.0351622	0.0385396	0.0440447	0
chr10:118764228-118765146*S_Shore	10	chr10:118764228-118765146	S_Shore	KIAA1598	1.16866e-06	4.44677e-05	6	6	cg23047500	118765255	1.0722e-07	2.02501e-05	0.126719	0.156567	0.152456	-0.0257369	0.0146228	0.0226434	0.0187208	0
chr11:67120856-67121228*S_Shore	11	chr11:67120856-67121228	S_Shore	POLD4	1.17333e-06	4.46072e-05	4	4	cg09706243	67121634	5.28629e-07	7.77548e-05	0.409526	0.342367	0.37469	0.0348357	0.025326	0.0417013	0.0223003	0
chr11:67120856-67121228*S_Shore	11	chr11:67120856-67121228	S_Shore	LOC100130987	1.17333e-06	4.46072e-05	4	4	cg09706243	67121634	5.28629e-07	7.77548e-05	0.409526	0.342367	0.37469	0.0348357	0.025326	0.0417013	0.0223003	0
chr1:205196791-205197252*N_Shore	1	chr1:205196791-205197252	N_Shore	TMCC2	1.17534e-06	4.46546e-05	4	3	cg11752894	205196012	9.87263e-06	0.000870268	0.752771	0.721782	0.724496	0.0282742	0.020904	0.0327734	0.0199809	0
chr14:90798164-90798394*S_Shore	14	chr14:90798164-90798394	S_Shore	C14orf102	1.17637e-06	4.4665e-05	3	3	cg01139586	90798784	7.6699e-08	1.52542e-05	0.472806	0.381951	0.419045	0.0537609	0.0429593	0.0713681	0.0531169	0
chr1:6484503-6485327*Island	1	chr1:6484503-6485327	Island	ESPN	1.20429e-06	4.56757e-05	6	5	cg13066963	6485317	5.76925e-07	8.39476e-05	0.31453	0.36645	0.359719	-0.045189	0.0294381	0.0507035	0.0285833	0
chr19:51109320-51109637*N_Shore	19	chr19:51109320-51109637	N_Shore	SNAR-F	1.21118e-06	4.58875e-05	5	5	cg25892657	51107937	2.08762e-06	0.000241753	0.525412	0.469874	0.465442	0.0599704	0.0606937	0.0600067	0.0484403	0
chr11:65029040-65029926*S_Shore	11	chr11:65029040-65029926	S_Shore	POLA2	1.21541e-06	4.6018e-05	3	3	cg16165748	65030448	1.84732e-06	0.000219796	0.490117	0.411232	0.416258	0.0738591	0.0438189	0.0682778	0.0376177	0
chr9:136293566-136294160*N_Shore	9	chr9:136293566-136294160	N_Shore	ADAMTS13	1.22084e-06	4.6194e-05	3	3	cg08795752	136293271	6.23693e-08	1.29754e-05	0.529442	0.463727	0.446522	0.0829205	0.0342978	0.0578534	0.0389856	0
chr17:53342198-53343061*N_Shore	17	chr17:53342198-53343061	N_Shore	HLF	1.24581e-06	4.70009e-05	6	6	cg07477034	53341969	2.1582e-07	3.6994e-05	0.346039	0.260247	0.279445	0.0665944	0.0368545	0.0460478	0.0314615	0
chr19:4064086-4067980*Island	19	chr19:4064086-4067980	Island	ZBTB7A	1.24963e-06	4.70009e-05	22	22	cg02993991	4064177	3.81217e-08	8.59011e-06	0.58462	0.448706	0.482796	0.101823	0.0644746	0.0725177	0.057706	0
chr17:1375216-1375460*N_Shore	17	chr17:1375216-1375460	N_Shore	MYO1C	1.25597e-06	4.7179e-05	6	6	cg26183265	1374597	0.000237137	0.0109245	0.7397	0.728316	0.729324	0.0103764	0.0248391	0.0283726	0.0229461	0
chr11:45943513-45944852*N_Shore	11	chr11:45943513-45944852	N_Shore	GYLTL1B	1.2748e-06	4.78107e-05	5	5	cg16335858	45942027	2.08571e-06	0.000241753	0.718806	0.766369	0.779146	-0.0603396	0.0288624	0.0645943	0.0188688	0
chr20:55966212-55966964*S_Shore	20	chr20:55966212-55966964	S_Shore	RBM38	1.2844e-06	4.81134e-05	4	4	cg18523477	55967503	7.13877e-06	0.000667337	0.453656	0.393404	0.391459	0.0621975	0.0416252	0.0751327	0.0430265	0
chr7:21985071-21985842*S_Shore	7	chr7:21985071-21985842	S_Shore	CDCA7L	1.29502e-06	4.83293e-05	3	3	cg11987645	21985935	5.80552e-08	1.22368e-05	0.191249	0.134402	0.153591	0.0376578	0.0318953	0.0307419	0.0282749	0
chr18:25755414-25758175*Island	18	chr18:25755414-25758175	Island	CDH2	1.29675e-06	4.83293e-05	13	13	cg02935338	25755847	5.1139e-07	7.57323e-05	0.123804	0.165333	0.138658	-0.0148538	0.0425821	0.0337229	0.0275215	0
chr2:97760184-97760756*S_Shore	2	chr2:97760184-97760756	S_Shore	FAHD2B	1.3045e-06	4.85874e-05	3	3	cg16573374	97761334	9.58178e-07	0.000127003	0.320863	0.25981	0.264668	0.0561945	0.0443394	0.0398602	0.035017	0
chr2:103353138-103353414*N_Shore	2	chr2:103353138-103353414	N_Shore	MFSD9	1.31292e-06	4.88494e-05	5	5	cg09999582	103352711	0.00415785	0.0900257	0.202952	0.160441	0.17403	0.0289218	0.0354713	0.037178	0.0267634	0
chr17:2598251-2598800*Island	17	chr17:2598251-2598800	Island	KIAA0664	1.31711e-06	4.89641e-05	4	4	cg03011952	2598252	9.58258e-08	1.84542e-05	0.768694	0.815611	0.817684	-0.0489905	0.0324074	0.0199332	0.0158886	0
chr16:3086283-3086968*N_Shore	16	chr16:3086283-3086968	N_Shore	CCDC64B	1.32121e-06	4.90648e-05	5	5	cg12686273	3085867	3.95477e-05	0.0026772	0.424769	0.36055	0.383932	0.0408378	0.0460713	0.0420598	0.0306353	0
chr12:2017133-2018161*Island	12	chr12:2017133-2018161	Island	CACNA2D4	1.33002e-06	4.93295e-05	6	6	cg02874016	2017649	4.4407e-07	6.76904e-05	0.783242	0.705828	0.70984	0.0734014	0.0475679	0.062437	0.0397717	0
chr16:698826-700244*N_Shore	16	chr16:698826-700244	N_Shore	WDR90	1.33349e-06	4.94018e-05	3	3	cg01120509	698230	5.61395e-08	1.18756e-05	0.467736	0.398808	0.416554	0.0511824	0.0341742	0.0273572	0.0285873	0
chr16:698826-700244*N_Shore	16	chr16:698826-700244	N_Shore	FAM195A	1.33349e-06	4.94018e-05	3	3	cg01120509	698230	5.61395e-08	1.18756e-05	0.467736	0.398808	0.416554	0.0511824	0.0341742	0.0273572	0.0285873	0
chr19:50193020-50194798*Island	19	chr19:50193020-50194798	Island	C19orf76	1.33562e-06	4.94018e-05	10	10	cg20727114	50194120	1.63662e-07	2.9101e-05	0.282095	0.153471	0.150648	0.131447	0.0689295	0.0412527	0.0380955	0
chr19:50193020-50194798*Island	19	chr19:50193020-50194798	Island	CPT1C	1.33562e-06	4.94018e-05	10	10	cg20727114	50194120	1.63662e-07	2.9101e-05	0.282095	0.153471	0.150648	0.131447	0.0689295	0.0412527	0.0380955	0
chr17:57298305-57298645*N_Shore	17	chr17:57298305-57298645	N_Shore	GDPD1	1.37314e-06	5.0548e-05	11	10	cg20936892	57297306	3.3159e-08	7.66794e-06	0.297125	0.224922	0.243903	0.0532222	0.0404586	0.0573784	0.0380514	0
chr7:157346613-157347069*N_Shore	7	chr7:157346613-157347069	N_Shore	PTPRN2	1.3732e-06	5.0548e-05	9	9	cg10471944	157345246	3.40195e-08	7.81567e-06	0.744569	0.701997	0.705751	0.0388185	0.0307202	0.044642	0.0325867	0
chr3:184056419-184056671*N_Shore	3	chr3:184056419-184056671	N_Shore	FAM131A	1.39771e-06	5.14071e-05	4	4	cg00205703	184054901	1.77606e-07	3.12336e-05	0.257985	0.206467	0.226029	0.0319556	0.0281899	0.0230471	0.0263177	0
chr11:32112394-32113277*N_Shore	11	chr11:32112394-32113277	N_Shore	RCN1	1.39941e-06	5.14266e-05	5	4	cg21160842	32112091	1.71228e-06	0.000206517	0.75769	0.679629	0.66157	0.0961197	0.04424	0.0826648	0.0636378	0
chr11:66623620-66626614*Island	11	chr11:66623620-66626614	Island	PC	1.41096e-06	5.1722e-05	12	12	cg11862081	66625106	2.60904e-07	4.31973e-05	0.438045	0.512504	0.507158	-0.0691134	0.0384975	0.0424793	0.0322027	0
chr11:66623620-66626614*Island	11	chr11:66623620-66626614	Island	LRFN4	1.41096e-06	5.1722e-05	12	12	cg11862081	66625106	2.60904e-07	4.31973e-05	0.438045	0.512504	0.507158	-0.0691134	0.0384975	0.0424793	0.0322027	0
chr17:7342829-7344028*N_Shore	17	chr17:7342829-7344028	N_Shore	FGF11	1.42593e-06	5.21946e-05	8	7	cg03613649	7341191	4.43505e-07	6.76627e-05	0.704096	0.641816	0.655844	0.048252	0.0342149	0.0493333	0.0370118	0
chr10:115938962-115939292*S_Shore	10	chr10:115938962-115939292	S_Shore	TDRD1	1.43884e-06	5.26342e-05	3	3	cg00397764	115939717	0.0336453	0.337857	0.730667	0.694031	0.679045	0.0516223	0.0579461	0.0737048	0.0552541	0
chr2:242808405-242808618*S_Shelf	2	chr2:242808405-242808618	S_Shelf	C2orf85	1.46517e-06	5.34333e-05	3	3	cg11654325	242810927	2.62385e-07	4.33725e-05	0.572152	0.526675	0.509129	0.063023	0.0639925	0.0437348	0.0484018	0
chr6:31802598-31802823*N_Shore	6	chr6:31802598-31802823	N_Shore	C6orf48	1.46614e-06	5.34333e-05	17	15	cg06482498	31802029	0.000115739	0.00623495	0.802262	0.781985	0.795319	0.00694288	0.0504689	0.0586602	0.0384709	0
chr6:31802598-31802823*N_Shore	6	chr6:31802598-31802823	N_Shore	SNORD48	1.46614e-06	5.34333e-05	17	15	cg06482498	31802029	0.000115739	0.00623495	0.802262	0.781985	0.795319	0.00694288	0.0504689	0.0586602	0.0384709	0
chr14:23821087-23822106*Island	14	chr14:23821087-23822106	Island	SLC22A17	1.47239e-06	5.35173e-05	8	7	cg14920289	23821149	5.98458e-08	1.25392e-05	0.451619	0.367121	0.36242	0.089199	0.0290401	0.0554772	0.0298679	0
chr15:56034562-56035712*N_Shore	15	chr15:56034562-56035712	N_Shore	PRTG	1.4754e-06	5.35824e-05	4	4	cg17221584	56033606	2.08145e-06	0.000241495	0.518631	0.38131	0.394364	0.124267	0.0571447	0.0843342	0.0832168	0
chr22:24114875-24115467*N_Shore	22	chr22:24114875-24115467	N_Shore	MMP11	1.48409e-06	5.38648e-05	3	3	cg23850277	24114770	1.08693e-05	0.000939787	0.406383	0.361424	0.385705	0.0206775	0.0243349	0.0414852	0.0180914	0
chr16:1414417-1414851*N_Shore	16	chr16:1414417-1414851	N_Shore	UNKL	1.49077e-06	5.40394e-05	4	4	cg04431935	1413516	4.26214e-08	9.44698e-06	0.565581	0.452424	0.483604	0.0819764	0.0402725	0.0571163	0.0398932	0
chr17:7218175-7218960*Island	17	chr17:7218175-7218960	Island	GPS2	1.49228e-06	5.40394e-05	7	7	cg27539234	7218945	1.03463e-07	1.97522e-05	0.184112	0.128989	0.132758	0.0513545	0.0255005	0.0183366	0.0177201	0
chr1:236304758-236305025*N_Shore	1	chr1:236304758-236305025	N_Shore	GPR137B	1.50493e-06	5.44499e-05	3	3	cg16044595	236304396	8.96384e-08	1.74341e-05	0.283011	0.368174	0.362483	-0.0794717	0.027635	0.047489	0.0344122	0
chr12:106532106-106533696*S_Shore	12	chr12:106532106-106533696	S_Shore	NUAK1	1.50701e-06	5.44499e-05	8	8	cg26877596	106534217	1.45936e-06	0.000181095	0.620819	0.538591	0.514613	0.106205	0.0400485	0.0554589	0.050507	0
chr8:145747509-145748682*Island	8	chr8:145747509-145748682	Island	LRRC14	1.51193e-06	5.45523e-05	5	5	cg14739437	145748548	1.34669e-07	2.47189e-05	0.260183	0.11248	0.129232	0.130951	0.0742328	0.0355605	0.0349447	0
chr8:145747509-145748682*Island	8	chr8:145747509-145748682	Island	LRRC24	1.51193e-06	5.45523e-05	5	5	cg14739437	145748548	1.34669e-07	2.47189e-05	0.260183	0.11248	0.129232	0.130951	0.0742328	0.0355605	0.0349447	0
chr7:138348962-138349444*N_Shore	7	chr7:138348962-138349444	N_Shore	SVOPL	1.51383e-06	5.45523e-05	5	5	cg12924654	138348384	1.77655e-05	0.00140003	0.526826	0.470364	0.498698	0.0281285	0.0350638	0.0469216	0.0498333	0
chr1:11898393-11898732*Island	1	chr1:11898393-11898732	Island	CLCN6	1.51418e-06	5.45523e-05	4	4	cg06177599	11898576	0.000391665	0.0160688	0.774286	0.715381	0.746387	0.0278998	0.0371458	0.0585102	0.0370072	0
chr14:93581083-93582797*N_Shore	14	chr14:93581083-93582797	N_Shore	ITPK1	1.55807e-06	5.60991e-05	3	3	cg09257735	93581049	2.07433e-06	0.000240949	0.218371	0.15916	0.164341	0.0540295	0.0452048	0.0352131	0.0356955	0
chr2:115918737-115920765*Island	2	chr2:115918737-115920765	Island	DPP10	1.56856e-06	5.63501e-05	11	11	cg05667379	115920764	1.01867e-06	0.000133551	0.132071	0.161475	0.14322	-0.0111484	0.0302547	0.0252636	0.0238942	0
chr8:143694430-143696166*N_Shore	8	chr8:143694430-143696166	N_Shore	ARC	1.57405e-06	5.65013e-05	4	4	cg13172906	143694295	3.99198e-07	6.22506e-05	0.892609	0.822468	0.81351	0.079099	0.0233911	0.0580272	0.0448802	0
chr10:135033330-135033739*Island	10	chr10:135033330-135033739	Island	KNDC1	1.60648e-06	5.76302e-05	3	3	cg02393606	135033364	5.4461e-06	0.000531963	0.501068	0.485062	0.44903	0.0520384	0.038086	0.0570597	0.0449782	0
chr4:114900355-114900810*Island	4	chr4:114900355-114900810	Island	ARSJ	1.61272e-06	5.78186e-05	3	3	cg05601456	114900431	4.11058e-06	0.000422409	0.302252	0.210432	0.190354	0.111898	0.0642186	0.0428491	0.0450496	0
chr16:1543098-1544426*S_Shore	16	chr16:1543098-1544426	S_Shore	TELO2	1.62823e-06	5.83153e-05	5	5	cg05304393	1545405	9.29131e-08	1.79915e-05	0.920016	0.822029	0.861901	0.0581147	0.0181802	0.0720872	0.0444656	0
chr12:81330608-81331514*S_Shore	12	chr12:81330608-81331514	S_Shore	LIN7A	1.68615e-06	6.03042e-05	7	7	cg03566513	81332744	4.56771e-08	1.0011e-05	0.497855	0.411622	0.453346	0.0445095	0.0605107	0.0648594	0.0708322	0
chr6:41753880-41755576*Island	6	chr6:41753880-41755576	Island	TOMM6	1.6951e-06	6.05014e-05	11	10	cg04163119	41754006	7.2992e-08	1.46492e-05	0.145724	0.0916757	0.105159	0.0405646	0.0275672	0.0195126	0.0163153	0
chr6:41753880-41755576*Island	6	chr6:41753880-41755576	Island	PRICKLE4	1.6951e-06	6.05014e-05	11	10	cg04163119	41754006	7.2992e-08	1.46492e-05	0.145724	0.0916757	0.105159	0.0405646	0.0275672	0.0195126	0.0163153	0
chr4:140216727-140217078*N_Shore	4	chr4:140216727-140217078	N_Shore	NDUFC1	1.70464e-06	6.0805e-05	3	3	cg15392111	140216263	2.47723e-07	4.1415e-05	0.200026	0.1328	0.126406	0.0736205	0.0397742	0.035316	0.0313471	0
chr8:145806258-145806713*S_Shore	8	chr8:145806258-145806713	S_Shore	KIAA1688	1.73972e-06	6.18934e-05	6	6	cg00697658	145808575	1.51814e-07	2.72973e-05	0.544872	0.616271	0.587755	-0.0428836	0.0539243	0.0511102	0.0530247	0
chr6:6002471-6005125*N_Shore	6	chr6:6002471-6005125	N_Shore	NRN1	1.77206e-06	6.29805e-05	5	5	cg13858611	6001842	2.94521e-06	0.000321548	0.362993	0.232483	0.235643	0.127351	0.0712806	0.0590498	0.0467394	0
chr11:64794832-64795362*N_Shore	11	chr11:64794832-64795362	N_Shore	SNX15	1.79146e-06	6.36056e-05	5	5	cg21717508	64793846	4.98744e-05	0.00320628	0.681209	0.653303	0.655377	0.0258314	0.0261975	0.0465507	0.0342939	0
chr1:1910268-1913800*N_Shelf	1	chr1:1910268-1913800	N_Shelf	KIAA1751	1.80281e-06	6.39314e-05	6	6	cg17016101	1907127	5.60398e-06	0.000545873	0.784233	0.722281	0.716776	0.0674574	0.0328123	0.0391927	0.0396145	0
chr2:208631558-208634934*N_Shore	2	chr2:208631558-208634934	N_Shore	FZD5	1.80445e-06	6.39509e-05	3	3	cg19744498	208631081	4.36836e-07	6.67609e-05	0.617675	0.539717	0.560204	0.0574711	0.0337617	0.0539949	0.0508716	0
chr14:105780339-105782027*N_Shore	14	chr14:105780339-105782027	N_Shore	PACS2	1.8273e-06	6.46955e-05	5	5	cg09278107	105779826	2.91471e-07	4.76884e-05	0.374252	0.31536	0.310152	0.0641003	0.0431864	0.0404526	0.039935	0
chr9:139738276-139744618*Island	9	chr9:139738276-139744618	Island	PHPT1	1.83848e-06	6.48701e-05	17	17	cg14162552	139744532	1.2664e-06	0.000160196	0.806789	0.77487	0.772139	0.0346492	0.0213771	0.0285578	0.0220772	0
chr5:133561140-133562544*N_Shore	5	chr5:133561140-133562544	N_Shore	PPP2CA	1.86522e-06	6.5774e-05	4	3	cg03183936	133560628	4.51989e-06	0.000455638	0.184239	0.101817	0.118262	0.0659769	0.0460423	0.0349002	0.0332017	0
chr6:82461133-82463805*N_Shore	6	chr6:82461133-82463805	N_Shore	FAM46A	1.90566e-06	6.71595e-05	3	3	cg22388948	82460558	7.53463e-06	0.00069768	0.26806	0.203516	0.193998	0.0740619	0.0637323	0.0384991	0.0460011	0
chr4:7774495-7774769*Island	4	chr4:7774495-7774769	Island	AFAP1	1.93441e-06	6.8132e-05	3	3	cg07109358	7774727	4.6834e-08	1.02011e-05	0.867559	0.771132	0.744376	0.123183	0.0715792	0.0699164	0.0547573	0
chr4:7774495-7774769*Island	4	chr4:7774495-7774769	Island	LOC84740	1.93441e-06	6.8132e-05	3	3	cg07109358	7774727	4.6834e-08	1.02011e-05	0.867559	0.771132	0.744376	0.123183	0.0715792	0.0699164	0.0547573	0
chr16:87416583-87418238*N_Shore	16	chr16:87416583-87418238	N_Shore	FBXO31	1.94189e-06	6.83545e-05	3	3	cg09642825	87416230	0.000113845	0.00615736	0.535306	0.420973	0.442747	0.0925597	0.0634198	0.0676771	0.0581644	0
chr17:80231019-80231820*S_Shore	17	chr17:80231019-80231820	S_Shore	CSNK1D	1.94418e-06	6.83805e-05	4	4	cg19761273	80232096	1.13129e-05	0.000971358	0.297481	0.2121	0.256334	0.0411466	0.0374079	0.0342688	0.0349651	0
chr7:123197660-123197925*S_Shore	7	chr7:123197660-123197925	S_Shore	NDUFA5	1.95241e-06	6.84706e-05	4	4	cg23531488	123198305	7.54346e-08	1.5031e-05	0.317961	0.222442	0.246295	0.0716665	0.0355123	0.0406253	0.0370926	0
chr6:30881533-30882296*Island	6	chr6:30881533-30882296	Island	VARS2	1.95879e-06	6.84706e-05	30	27	cg26860970	30881658	4.65447e-07	7.05218e-05	0.310197	0.201699	0.1845	0.125696	0.0672958	0.0646636	0.0379962	0
chr6:30881533-30882296*Island	6	chr6:30881533-30882296	Island	GTF2H4	1.95879e-06	6.84706e-05	30	27	cg26860970	30881658	4.65447e-07	7.05218e-05	0.310197	0.201699	0.1845	0.125696	0.0672958	0.0646636	0.0379962	0
chr19:58878386-58880634*Island	19	chr19:58878386-58880634	Island	ZNF837	1.98461e-06	6.92357e-05	7	7	cg09594291	58879022	2.15084e-07	3.69038e-05	0.853521	0.807071	0.774918	0.078603	0.0223672	0.0449381	0.045812	0
chr21:46351328-46352911*N_Shelf	21	chr21:46351328-46352911	N_Shelf	ITGB2	2.03421e-06	7.0882e-05	6	6	cg20556503	46349095	7.83689e-07	0.000107534	0.789102	0.828122	0.823244	-0.034142	0.0263717	0.0241409	0.0244223	0
chr1:1289707-1291126*S_Shelf	1	chr1:1289707-1291126	S_Shelf	MXRA8	2.07751e-06	7.20695e-05	7	6	cg23973885	1294881	1.52957e-06	0.000188086	0.475319	0.521604	0.513153	-0.0378345	0.0321238	0.0314312	0.037048	0
chr16:1029878-1035327*Island	16	chr16:1029878-1035327	Island	SOX8	2.07974e-06	7.20695e-05	23	22	cg00304185	1033074	1.34917e-06	0.000169329	0.767703	0.64772	0.657519	0.110183	0.0489558	0.10149	0.0617283	0
chr20:62338659-62340274*Island	20	chr20:62338659-62340274	Island	ARFRP1	2.0876e-06	7.21716e-05	12	12	cg16209860	62340198	1.55941e-07	2.78405e-05	0.573204	0.497142	0.507879	0.0653253	0.0312496	0.0422724	0.034193	0
chr20:62338659-62340274*Island	20	chr20:62338659-62340274	Island	ZGPAT	2.0876e-06	7.21716e-05	12	12	cg16209860	62340198	1.55941e-07	2.78405e-05	0.573204	0.497142	0.507879	0.0653253	0.0312496	0.0422724	0.034193	0
chr18:49868377-49868759*Island	18	chr18:49868377-49868759	Island	DCC	2.10092e-06	7.25751e-05	4	4	cg18866015	49868552	2.46487e-06	0.00027673	0.0848951	0.131518	0.0796438	0.00525122	0.0541364	0.0631864	0.0311934	0
chr19:12958152-12958891*Island	19	chr19:12958152-12958891	Island	MAST1	2.12462e-06	7.33218e-05	5	5	cg13344344	12958803	4.20328e-07	6.45525e-05	0.363911	0.300488	0.310306	0.0536048	0.0322456	0.0485894	0.0259313	0
chr19:41816025-41816350*N_Shore	19	chr19:41816025-41816350	N_Shore	CCDC97	2.13144e-06	7.34853e-05	5	5	cg08398371	41814839	7.82609e-08	1.55298e-05	0.694083	0.644864	0.649665	0.0444184	0.0327349	0.029484	0.0307442	0
chr6:31868781-31870311*S_Shore	6	chr6:31868781-31870311	S_Shore	ZBTB12	2.15979e-06	7.43462e-05	9	8	cg06540876	31870600	4.05242e-07	6.2804e-05	0.719167	0.574366	0.609145	0.110022	0.0529939	0.0644109	0.0550793	0
chr6:30584885-30585677*N_Shelf	6	chr6:30584885-30585677	N_Shelf	PPP1R10	2.19524e-06	7.53458e-05	8	8	cg10977734	30582416	1.99359e-07	3.45082e-05	0.131541	0.0960524	0.103965	0.0275752	0.0206925	0.0190584	0.0178116	0
chr4:6925211-6925591*S_Shelf	4	chr4:6925211-6925591	S_Shelf	TBC1D14	2.19695e-06	7.53458e-05	4	4	cg20723412	6927635	7.97632e-07	0.000108955	0.5256	0.578239	0.57377	-0.0481697	0.028	0.0395935	0.0313471	0
chr6:116574906-116575367*S_Shore	6	chr6:116574906-116575367	S_Shore	TSPYL4	2.20445e-06	7.55589e-05	3	3	cg18828861	116576566	2.39713e-06	0.000270885	0.769554	0.61545	0.660973	0.108581	0.0457699	0.0809836	0.0512938	0
chr4:3341783-3342021*S_Shelf	4	chr4:3341783-3342021	S_Shelf	RGS12	2.20638e-06	7.55809e-05	3	3	cg17491449	3344154	8.3473e-07	0.000112798	0.233678	0.27214	0.294272	-0.0605947	0.0281035	0.0417909	0.0460823	0
chr10:85997109-85997427*Island	10	chr10:85997109-85997427	Island	LRIT1	2.20977e-06	7.56531e-05	3	3	cg23916496	85997314	1.17649e-06	0.000150008	0.701755	0.6645	0.619832	0.0819228	0.0378389	0.0590612	0.044455	0
chr5:523676-524887*N_Shore	5	chr5:523676-524887	N_Shore	SLC9A3	2.21174e-06	7.56762e-05	3	3	cg02354563	522363	6.03148e-08	1.26075e-05	0.592698	0.490534	0.50262	0.0900778	0.0382238	0.0514781	0.0450616	0
chr7:107301205-107302416*N_Shore	7	chr7:107301205-107302416	N_Shore	LOC286002	2.25034e-06	7.68775e-05	8	8	cg26779378	107300957	1.06807e-06	0.000138488	0.0802965	0.122403	0.116279	-0.0359828	0.0150013	0.0283392	0.0167746	0
chr7:107301205-107302416*N_Shore	7	chr7:107301205-107302416	N_Shore	SLC26A4	2.25034e-06	7.68775e-05	8	8	cg26779378	107300957	1.06807e-06	0.000138488	0.0802965	0.122403	0.116279	-0.0359828	0.0150013	0.0283392	0.0167746	0
chr12:120241921-120242233*N_Shore	12	chr12:120241921-120242233	N_Shore	CIT	2.26484e-06	7.73131e-05	4	4	cg04948014	120241494	1.20553e-06	0.000152826	0.594909	0.56173	0.551138	0.0437709	0.0325725	0.0477182	0.0313476	0
chr16:10912159-10912719*Island	16	chr16:10912159-10912719	Island	FAM18A	2.30651e-06	7.86441e-05	6	6	cg09684846	10912718	8.5279e-05	0.0049253	0.887537	0.750014	0.794056	0.093481	0.0440651	0.131966	0.0636482	0
chr2:95690857-95692431*S_Shore	2	chr2:95690857-95692431	S_Shore	MAL	2.3232e-06	7.90363e-05	3	3	cg14410476	95693023	4.82071e-07	7.25415e-05	0.346971	0.275805	0.261553	0.0854188	0.0647351	0.0779142	0.0396785	0
chr9:140172613-140176105*Island	9	chr9:140172613-140176105	Island	C9orf167	2.32833e-06	7.90363e-05	12	12	cg13274149	140175393	0.000256356	0.0116334	0.352698	0.394258	0.378176	-0.0254781	0.0332043	0.034378	0.0209569	0
chr10:35896518-35897461*N_Shelf	10	chr10:35896518-35897461	N_Shelf	GJD4	2.35153e-06	7.96855e-05	10	9	cg12630277	35894012	8.43714e-07	0.000113663	0.45258	0.396904	0.422879	0.029701	0.0264665	0.0426908	0.0302139	0
chr14:106938196-106938818*Island	14	chr14:106938196-106938818	Island	LOC100133469	2.37642e-06	8.03746e-05	10	10	cg16251255	106938621	6.07564e-07	8.76306e-05	0.810198	0.722595	0.716696	0.0935028	0.0308881	0.0722686	0.0521683	0
chr2:74781494-74782685*N_Shore	2	chr2:74781494-74782685	N_Shore	LOXL3	2.42452e-06	8.1907e-05	6	6	cg15989091	74780172	6.25238e-08	1.29866e-05	0.561822	0.614534	0.618172	-0.0563506	0.0293544	0.0365282	0.031089	0
chr17:7117596-7118085*N_Shore	17	chr17:7117596-7118085	N_Shore	DLG4	2.43137e-06	8.20596e-05	5	5	cg01697794	7117125	1.17086e-07	2.19488e-05	0.514678	0.420224	0.410229	0.104449	0.0481145	0.0703315	0.0463175	0
chr20:21485932-21496714*Island	20	chr20:21485932-21496714	Island	NKX2-2	2.48983e-06	8.36997e-05	18	16	cg18464649	21491781	2.27475e-07	3.87656e-05	0.408961	0.467585	0.477174	-0.0682126	0.0517964	0.0455366	0.035416	0
chr15:62359827-62360995*N_Shore	15	chr15:62359827-62360995	N_Shore	C2CD4A	2.49231e-06	8.36997e-05	10	10	cg08200404	62359539	8.46644e-06	0.000766639	0.429677	0.36361	0.398428	0.0312488	0.0408585	0.0474236	0.0403134	0
chr17:19436788-19437692*S_Shore	17	chr17:19436788-19437692	S_Shore	SLC47A1	2.49976e-06	8.38699e-05	5	5	cg10718608	19438221	7.29828e-08	1.46492e-05	0.169694	0.231507	0.220651	-0.050957	0.0193249	0.0264803	0.0216916	0
chr21:40757602-40757900*Island	21	chr21:40757602-40757900	Island	WRB	2.50134e-06	8.3875e-05	3	3	cg26710963	40757899	8.16772e-08	1.60644e-05	0.515014	0.470156	0.471699	0.0433143	0.0195978	0.0385886	0.0205901	0
chr2:31456740-31457653*Island	2	chr2:31456740-31457653	Island	EHD3	2.54265e-06	8.505e-05	13	13	cg08251399	31457608	1.74981e-06	0.000210756	0.678856	0.624644	0.617059	0.0617971	0.0269128	0.0464338	0.0323472	0
chr3:10547178-10547389*S_Shore	3	chr3:10547178-10547389	S_Shore	ATP2B2	2.55754e-06	8.54991e-05	3	3	cg24952744	10547584	1.99761e-07	3.45438e-05	0.488725	0.460199	0.461052	0.0276726	0.0358929	0.0525539	0.0349546	0
chr10:115999008-115999603*N_Shore	10	chr10:115999008-115999603	N_Shore	VWA2	2.56315e-06	8.56055e-05	5	5	cg24242022	115998493	8.5761e-06	0.000774877	0.203484	0.142003	0.148792	0.0546917	0.0309695	0.0354284	0.0300684	0
chr10:112257163-112258684*S_Shore	10	chr10:112257163-112258684	S_Shore	DUSP5	2.59897e-06	8.66701e-05	3	3	cg09357462	112259305	2.20322e-05	0.0016691	0.524027	0.602364	0.610988	-0.0869615	0.0469286	0.0567526	0.0320294	0
chr11:789871-790133*N_Shore	11	chr11:789871-790133	N_Shore	CEND1	2.6023e-06	8.66701e-05	7	7	cg24193659	788406	9.24752e-07	0.000123168	0.79494	0.873109	0.85755	-0.0626098	0.0397073	0.0374429	0.0216536	0
chr15:41785616-41788539*Island	15	chr15:41785616-41788539	Island	ITPKA	2.60584e-06	8.66701e-05	9	9	cg04625615	41788368	1.4562e-07	2.63991e-05	0.687257	0.745022	0.751336	-0.0640793	0.0417903	0.0587649	0.0275998	0
chr7:27194583-27194827*N_Shore	7	chr7:27194583-27194827	N_Shore	HOXA7	2.62012e-06	8.69566e-05	3	3	cg24389054	27194013	1.45951e-07	2.64174e-05	0.633069	0.700386	0.716381	-0.0833112	0.043885	0.0541334	0.0472374	0
chr17:80674547-80675236*N_Shore	17	chr17:80674547-80675236	N_Shore	FN3KRP	2.62087e-06	8.69566e-05	10	10	cg14688272	80673958	2.3252e-07	3.94331e-05	0.633489	0.577349	0.585565	0.0479243	0.028984	0.0549634	0.034587	0
chr8:144099456-144099731*N_Shore	8	chr8:144099456-144099731	N_Shore	LY6E	2.64408e-06	8.7677e-05	3	3	cg14489570	144099280	0.0013197	0.040205	0.10124	0.0735856	0.0751442	0.0260953	0.028227	0.0214944	0.0186653	0
chr8:144099456-144099731*N_Shore	8	chr8:144099456-144099731	N_Shore	LOC100133669	2.64408e-06	8.7677e-05	3	3	cg14489570	144099280	0.0013197	0.040205	0.10124	0.0735856	0.0751442	0.0260953	0.028227	0.0214944	0.0186653	0
chr11:64013772-64015341*Island	11	chr11:64013772-64015341	Island	PPP1R14B	2.65241e-06	8.77523e-05	9	9	cg07773434	64015289	8.83518e-08	1.72028e-05	0.490995	0.431725	0.435007	0.0559882	0.0401217	0.0439543	0.0351787	0
chr12:56325774-56326223*N_Shore	12	chr12:56325774-56326223	N_Shore	DGKA	2.65432e-06	8.77523e-05	8	7	cg21587469	56323816	1.35968e-06	0.000170406	0.491233	0.589617	0.550246	-0.0590133	0.0514182	0.0462886	0.0438746	0
chr9:140167199-140167452*N_Shore	9	chr9:140167199-140167452	N_Shore	COBRA1	2.66715e-06	8.80822e-05	3	3	cg01099825	140166114	2.40069e-07	4.02707e-05	0.258498	0.305584	0.294276	-0.0357776	0.0281678	0.0336034	0.0290894	0
chr19:58867397-58868868*Island	19	chr19:58867397-58868868	Island	ZNF497	2.6673e-06	8.80822e-05	3	3	cg05317207	58867669	4.95559e-07	7.41912e-05	0.376731	0.261649	0.241559	0.135172	0.0797286	0.0588144	0.0651853	0
chr1:192777632-192778198*S_Shore	1	chr1:192777632-192778198	S_Shore	RGS2	2.71428e-06	8.95667e-05	4	4	cg05374271	192778890	6.48688e-08	1.33535e-05	0.766319	0.617421	0.628552	0.137767	0.0381275	0.0694719	0.0557823	0
chr6:30028936-30029195*N_Shore	6	chr6:30028936-30029195	N_Shore	ZNRD1	2.7535e-06	9.04063e-05	18	18	cg02078039	30028257	1.2516e-06	0.000158438	0.126407	0.0564197	0.0542272	0.0721796	0.0486038	0.0335362	0.0303994	0
chr6:30028936-30029195*N_Shore	6	chr6:30028936-30029195	N_Shore	NCRNA00171	2.7535e-06	9.04063e-05	18	18	cg02078039	30028257	1.2516e-06	0.000158438	0.126407	0.0564197	0.0542272	0.0721796	0.0486038	0.0335362	0.0303994	0
chr17:73892496-73893448*Island	17	chr17:73892496-73893448	Island	TRIM65	2.75447e-06	9.04063e-05	8	8	cg26780705	73893424	5.89471e-06	0.000570095	0.892772	0.834667	0.835559	0.0572129	0.027574	0.0559065	0.0354192	0
chr16:2139803-2142170*Island	16	chr16:2139803-2142170	Island	PKD1	2.75614e-06	9.04063e-05	7	6	cg01965047	2140870	5.53059e-07	8.09428e-05	0.690342	0.764188	0.743516	-0.0531742	0.0467073	0.0408566	0.0368191	0
chr16:2139803-2142170*Island	16	chr16:2139803-2142170	Island	MIR1225	2.75614e-06	9.04063e-05	7	6	cg01965047	2140870	5.53059e-07	8.09428e-05	0.690342	0.764188	0.743516	-0.0531742	0.0467073	0.0408566	0.0368191	0
chr1:23885682-23886212*S_Shore	1	chr1:23885682-23886212	S_Shore	ID3	2.76975e-06	9.08018e-05	3	3	cg11336311	23887324	1.96922e-07	3.42207e-05	0.514377	0.400056	0.424148	0.0902295	0.0392731	0.0563003	0.0602211	0
chr17:29885900-29887377*Island	17	chr17:29885900-29887377	Island	MIR193A	2.82653e-06	9.25943e-05	6	4	cg22894896	29886890	1.24941e-07	2.3126e-05	0.573951	0.522588	0.447711	0.126239	0.0560302	0.056987	0.0428255	0
chr1:32740710-32741544*Island	1	chr1:32740710-32741544	Island	LCK	2.82977e-06	9.26147e-05	5	5	cg10994944	32741152	1.48675e-06	0.000183847	0.473089	0.414101	0.419656	0.0534332	0.0373183	0.0390426	0.0384416	0
chr17:7760281-7761680*N_Shore	17	chr17:7760281-7761680	N_Shore	TMEM88	2.83555e-06	9.27348e-05	4	4	cg06759255	7759060	1.7853e-07	3.13336e-05	0.561357	0.496037	0.501923	0.0594341	0.0359795	0.0518591	0.0368102	0
chr19:18433642-18434178*S_Shore	19	chr19:18433642-18434178	S_Shore	LSM4	2.84532e-06	9.29852e-05	4	4	cg06484360	18434522	3.04247e-06	0.000328906	0.126926	0.0908396	0.113389	0.0135377	0.0248288	0.0255754	0.0206248	0
chr11:63448704-63449386*N_Shore	11	chr11:63448704-63449386	N_Shore	RTN3	2.8596e-06	9.34e-05	3	3	cg17372806	63448356	1.98122e-06	0.000232123	0.526884	0.486472	0.487316	0.0395689	0.0405759	0.0570839	0.0353402	0
chr17:8191864-8192495*N_Shore	17	chr17:8191864-8192495	N_Shore	SLC25A35	2.86911e-06	9.34783e-05	6	5	cg16696476	8191344	1.54261e-07	2.75684e-05	0.534515	0.472754	0.482946	0.0515694	0.0413314	0.0501308	0.0338098	0
chr17:8191864-8192495*N_Shore	17	chr17:8191864-8192495	N_Shore	RANGRF	2.86911e-06	9.34783e-05	6	5	cg16696476	8191344	1.54261e-07	2.75684e-05	0.534515	0.472754	0.482946	0.0515694	0.0413314	0.0501308	0.0338098	0
chr6:28554863-28555124*S_Shore	6	chr6:28554863-28555124	S_Shore	SCAND3	2.87367e-06	9.34783e-05	17	17	cg13784621	28555440	2.03852e-06	0.000237645	0.0612268	0.0779488	0.084859	-0.0236322	0.0173892	0.0157089	0.0184366	0
chr19:49223833-49224276*Island	19	chr19:49223833-49224276	Island	RASIP1	2.9009e-06	9.42945e-05	4	4	cg10404009	49223845	1.64967e-06	0.000200476	0.59499	0.454842	0.468628	0.126362	0.0587365	0.0841677	0.0716673	0
chr19:49223833-49224276*Island	19	chr19:49223833-49224276	Island	MAMSTR	2.9009e-06	9.42945e-05	4	4	cg10404009	49223845	1.64967e-06	0.000200476	0.59499	0.454842	0.468628	0.126362	0.0587365	0.0841677	0.0716673	0
chr19:10426381-10426723*S_Shore	19	chr19:10426381-10426723	S_Shore	FDX1L	2.91707e-06	9.47327e-05	5	5	cg27259408	10427154	1.12111e-06	0.000143989	0.506675	0.452503	0.47977	0.0269048	0.0330397	0.0437537	0.03366	0
chr19:10426381-10426723*S_Shore	19	chr19:10426381-10426723	S_Shore	RAVER1	2.91707e-06	9.47327e-05	5	5	cg27259408	10427154	1.12111e-06	0.000143989	0.506675	0.452503	0.47977	0.0269048	0.0330397	0.0437537	0.03366	0
chr7:101961741-101962226*Island	7	chr7:101961741-101962226	Island	SH2B2	2.92785e-06	9.50302e-05	3	3	cg17190891	101962112	6.96875e-07	9.77684e-05	0.32667	0.468902	0.403813	-0.0771429	0.0424019	0.077626	0.044949	0
chr6:155539975-155540193*N_Shelf	6	chr6:155539975-155540193	N_Shelf	TIAM2	2.95519e-06	9.58117e-05	6	6	cg21707172	155537944	1.08738e-06	0.000140375	0.694319	0.57509	0.59966	0.0946595	0.0355815	0.0885926	0.0641567	0
chr10:43697777-43698177*S_Shore	10	chr10:43697777-43698177	S_Shore	RASGEF1A	2.95856e-06	9.58682e-05	3	3	cg16595288	43698931	9.49056e-08	1.83572e-05	0.450626	0.543266	0.547731	-0.0971046	0.0490971	0.0668419	0.0398136	0
chr19:55873636-55873993*S_Shore	19	chr19:55873636-55873993	S_Shore	FAM71E2	2.97298e-06	9.61882e-05	6	6	cg03483944	55874700	3.37365e-07	5.42899e-05	0.716318	0.673818	0.670735	0.0455831	0.0209433	0.0410773	0.0339694	0
chr10:103879633-103880628*S_Shore	10	chr10:103879633-103880628	S_Shore	LDB1	2.97717e-06	9.61882e-05	10	10	cg17915961	103881480	1.15458e-07	2.16666e-05	0.406497	0.329453	0.347011	0.0594858	0.0388983	0.0385862	0.0376035	0
chr16:70719114-70720441*Island	16	chr16:70719114-70720441	Island	MTSS1L	3.009e-06	9.70563e-05	9	9	cg07838048	70720440	1.92871e-06	0.000228181	0.687852	0.654681	0.645743	0.0421086	0.0225935	0.044229	0.0230893	0
chr11:46402624-46404139*Island	11	chr11:46402624-46404139	Island	MDK	3.02014e-06	9.7291e-05	7	7	cg01502396	46403923	2.56728e-07	4.26776e-05	0.103355	0.062198	0.0526095	0.0507455	0.026914	0.0161185	0.0140942	0
chr17:79425847-79426169*N_Shelf	17	chr17:79425847-79426169	N_Shelf	BAHCC1	3.06547e-06	9.86972e-05	3	3	cg12194745	79423649	7.84239e-07	0.000107534	0.596517	0.556692	0.546106	0.0504104	0.0377589	0.04984	0.0310155	0
chr1:2997272-2997473*N_Shore	1	chr1:2997272-2997473	N_Shore	PRDM16	3.09189e-06	9.93662e-05	7	6	cg12297125	2996522	2.84521e-07	4.66594e-05	0.852071	0.686086	0.728054	0.124017	0.0598799	0.135561	0.0593193	0
chr11:113258443-113258821*N_Shore	11	chr11:113258443-113258821	N_Shore	ANKK1	3.09948e-06	9.95375e-05	4	4	cg05815275	113258390	6.49789e-06	0.000619254	0.610931	0.693212	0.692282	-0.0813509	0.048412	0.0412689	0.0316506	0
chr1:86046362-86047240*N_Shore	1	chr1:86046362-86047240	N_Shore	DDAH1	3.11064e-06	9.97867e-05	6	6	cg13871826	86045347	1.57446e-07	2.80523e-05	0.64939	0.721271	0.73572	-0.0863297	0.0355914	0.0610983	0.046141	0
chr1:86046362-86047240*N_Shore	1	chr1:86046362-86047240	N_Shore	CYR61	3.11064e-06	9.97867e-05	6	6	cg13871826	86045347	1.57446e-07	2.80523e-05	0.64939	0.721271	0.73572	-0.0863297	0.0355914	0.0610983	0.046141	0
chr13:20806016-20806867*N_Shore	13	chr13:20806016-20806867	N_Shore	GJB6	3.16432e-06	0.000101306	11	11	cg09203312	20805196	2.71797e-07	4.48862e-05	0.71033	0.595831	0.622989	0.0873403	0.0458238	0.083456	0.0544368	0
chr1:182921819-182922644*S_Shore	1	chr1:182921819-182922644	S_Shore	C1orf14	3.23e-06	0.000103334	4	4	cg26419869	182923215	1.35014e-06	0.000169331	0.73117	0.794011	0.794872	-0.0637025	0.0427209	0.0480362	0.0309122	0
chr17:77127405-77127606*S_Shore	17	chr17:77127405-77127606	S_Shore	HRNBP3	3.24832e-06	0.000103863	3	3	cg14435645	77128623	1.06492e-07	2.01557e-05	0.695193	0.604426	0.605118	0.0900752	0.0339886	0.0343369	0.034031	0
chr5:131607018-131607889*S_Shore	5	chr5:131607018-131607889	S_Shore	PDLIM4	3.27586e-06	0.000104668	4	4	cg03873281	131608955	1.81812e-07	3.18462e-05	0.715933	0.510718	0.572876	0.143057	0.0556486	0.0814534	0.0730922	0
chr11:85374872-85376234*S_Shore	11	chr11:85374872-85376234	S_Shore	CREBZF	3.35763e-06	0.000107028	3	3	cg26006254	85377031	1.68435e-07	2.97694e-05	0.377259	0.460939	0.462206	-0.0849465	0.0440031	0.0399783	0.0371191	0
chr6:18122250-18122994*S_Shore	6	chr6:18122250-18122994	S_Shore	NHLRC1	3.36209e-06	0.000107054	6	6	cg06646708	18123224	4.94597e-07	7.411e-05	0.780933	0.74739	0.70784	0.0730935	0.0399855	0.0475378	0.0565553	0
chr17:26708225-26708805*Island	17	chr17:26708225-26708805	Island	SARM1	3.39733e-06	0.000108118	3	3	cg13895343	26708773	3.6573e-07	5.79548e-05	0.490507	0.57846	0.542019	-0.0515118	0.0301512	0.0425642	0.031093	0
chr1:110162464-110162716*S_Shore	1	chr1:110162464-110162716	S_Shore	AMPD2	3.41598e-06	0.000108613	5	5	cg07954706	110164547	5.33396e-07	7.83252e-05	0.424989	0.348202	0.370207	0.0547823	0.039224	0.0434423	0.0217778	0
chr14:24550317-24551148*Island	14	chr14:24550317-24551148	Island	NRL	3.46088e-06	0.000109867	4	4	cg07606234	24551147	1.07667e-06	0.000139295	0.538369	0.582959	0.622946	-0.0845771	0.047333	0.0852167	0.0370601	0
chr12:124873241-124874008*Island	12	chr12:124873241-124874008	Island	NCOR2	3.46547e-06	0.000109867	3	3	cg24975642	124873347	1.33749e-05	0.00111039	0.191427	0.237206	0.210538	-0.0191107	0.0476106	0.0424395	0.0450005	0
chr6:32097820-32098086*N_Shelf	6	chr6:32097820-32098086	N_Shelf	ATF6B	3.47351e-06	0.000109867	24	22	cg22986222	32095276	1.93346e-06	0.000228502	0.357393	0.292484	0.319965	0.037428	0.0330665	0.0490305	0.0242035	0
chr8:145163068-145165467*N_Shore	8	chr8:145163068-145165467	N_Shore	KIAA1875	3.48952e-06	0.000110235	7	7	cg19978055	145162529	0.000136425	0.00708922	0.78982	0.746027	0.744712	0.0451085	0.0183027	0.0476243	0.0362647	0
chr2:45235511-45237792*N_Shore	2	chr2:45235511-45237792	N_Shore	SIX2	3.5005e-06	0.000110444	7	7	cg16240781	45234379	9.55102e-06	0.000846152	0.554509	0.628472	0.633615	-0.0791064	0.0433226	0.0645096	0.0437314	0
chr11:73087229-73088294*N_Shore	11	chr11:73087229-73088294	N_Shore	RELT	3.54301e-06	0.000111705	4	4	cg07709430	73086934	4.73616e-07	7.15136e-05	0.313493	0.269182	0.281662	0.0318318	0.0272913	0.0296338	0.0235338	0
chr1:85513509-85514555*S_Shore	1	chr1:85513509-85514555	S_Shore	MCOLN3	3.55486e-06	0.000111998	4	4	cg12210618	85515536	1.13547e-07	2.13307e-05	0.307386	0.389736	0.387519	-0.0801329	0.0448601	0.0517828	0.0368952	0
chr7:150705759-150706129*S_Shore	7	chr7:150705759-150706129	S_Shore	NOS3	3.56044e-06	0.000112074	5	5	cg00571021	150707313	0.000616587	0.0227538	0.69462	0.724939	0.737664	-0.0430445	0.0374655	0.0397938	0.0270248	0
chr17:7826127-7826414*Island	17	chr17:7826127-7826414	Island	KCNAB3	3.5782e-06	0.000112532	5	5	cg06975048	7826155	3.23179e-06	0.000345766	0.155012	0.12093	0.102014	0.0529986	0.0341292	0.0209684	0.0186694	0
chr1:6639427-6640361*Island	1	chr1:6639427-6640361	Island	TAS1R1	3.59112e-06	0.000112744	9	9	cg07565540	6639754	4.97596e-07	7.44329e-05	0.191818	0.12108	0.131617	0.0602015	0.0459322	0.0325623	0.036084	0
chr1:6639427-6640361*Island	1	chr1:6639427-6640361	Island	ZBTB48	3.59112e-06	0.000112744	9	9	cg07565540	6639754	4.97596e-07	7.44329e-05	0.191818	0.12108	0.131617	0.0602015	0.0459322	0.0325623	0.036084	0
chr20:11871374-11872207*N_Shore	20	chr20:11871374-11872207	N_Shore	BTBD3	3.59326e-06	0.000112744	5	4	cg24562149	11870817	2.50301e-06	0.000279682	0.673601	0.604919	0.611692	0.0619087	0.0357717	0.0563958	0.0342758	0
chr1:22140891-22141407*Island	1	chr1:22140891-22141407	Island	LDLRAD2	3.59967e-06	0.000112845	5	5	cg24334174	22141341	2.01261e-07	3.4769e-05	0.803178	0.839149	0.852994	-0.0498165	0.031421	0.0736282	0.0250867	0
chr7:2774444-2774655*N_Shore	7	chr7:2774444-2774655	N_Shore	GNA12	3.68664e-06	0.000115302	9	9	cg01670430	2773010	2.46717e-06	0.00027673	0.448682	0.382726	0.404396	0.0442865	0.0369644	0.0463859	0.0380041	0
chr7:130794689-130795032*Island	7	chr7:130794689-130795032	Island	MKLN1	3.68851e-06	0.000115302	7	7	cg23731991	130795031	3.57828e-06	0.000374871	0.125809	0.0963987	0.102477	0.0233319	0.0227036	0.0111518	0.0123785	0
chr7:130794689-130795032*Island	7	chr7:130794689-130795032	Island	FLJ43663	3.68851e-06	0.000115302	7	7	cg23731991	130795031	3.57828e-06	0.000374871	0.125809	0.0963987	0.102477	0.0233319	0.0227036	0.0111518	0.0123785	0
chr1:2409757-2410049*S_Shore	1	chr1:2409757-2410049	S_Shore	PLCH2	3.72658e-06	0.00011643	3	3	cg06824523	2411612	1.08973e-07	2.05372e-05	0.757414	0.705485	0.719447	0.0379672	0.0245256	0.0382879	0.029045	0
chr2:128421719-128422182*S_Shore	2	chr2:128421719-128422182	S_Shore	LIMS2	3.74057e-06	0.000116764	7	5	cg11535366	128422284	2.08054e-07	3.58371e-05	0.77021	0.723068	0.730959	0.0392507	0.0227278	0.0658659	0.0259729	0
chr22:26879458-26879930*N_Shelf	22	chr22:26879458-26879930	N_Shelf	HPS4	3.75107e-06	0.000116892	7	7	cg27468704	26875823	1.69806e-06	0.000205224	0.343469	0.253714	0.277799	0.0656699	0.0455079	0.0284205	0.0357957	0
chr15:72104191-72104418*N_Shore	15	chr15:72104191-72104418	N_Shore	NR2E3	3.75397e-06	0.000116892	7	7	cg26235659	72102890	1.37388e-06	0.000171697	0.861971	0.832538	0.824445	0.0375261	0.0179812	0.0428291	0.0202174	0
chr2:946881-947286*Island	2	chr2:946881-947286	Island	SNTG2	3.77084e-06	0.000117355	3	3	cg16179952	947117	3.31461e-05	0.00232151	0.210736	0.249359	0.224322	-0.0135857	0.0338985	0.0298783	0.0250008	0
chr5:138739492-138739912*S_Shore	5	chr5:138739492-138739912	S_Shore	SPATA24	3.80063e-06	0.000118178	5	5	cg02584432	138740366	1.86866e-07	3.26019e-05	0.275122	0.235003	0.238199	0.0369225	0.0219703	0.0306403	0.0135027	0
chr2:196521555-196522950*N_Shore	2	chr2:196521555-196522950	N_Shore	SLC39A10	3.81296e-06	0.000118392	6	4	cg16158027	196520930	8.6206e-07	0.000115605	0.431424	0.478499	0.49733	-0.0659063	0.0570655	0.0477936	0.0599069	0
chr10:119293917-119297675*Island	10	chr10:119293917-119297675	Island	EMX2OS	3.82298e-06	0.000118392	20	19	cg26342147	119295827	0.000675895	0.0244108	0.168815	0.162484	0.149049	0.0197657	0.0211899	0.027251	0.019703	0
chr15:41803443-41805531*S_Shore	15	chr15:41803443-41805531	S_Shore	LTK	3.83793e-06	0.000118688	8	8	cg03321553	41806234	2.65521e-06	0.000294447	0.509755	0.579316	0.565181	-0.055426	0.0344104	0.0390506	0.0239516	0
chr6:31830299-31830948*N_Shore	6	chr6:31830299-31830948	N_Shore	NEU1	3.91722e-06	0.000120653	25	23	cg19070159	31829644	1.18964e-06	0.000151355	0.642734	0.611537	0.622405	0.020329	0.030288	0.0390824	0.0252769	0
chr10:118895963-118898037*Island	10	chr10:118895963-118898037	Island	VAX1	3.93275e-06	0.000120857	13	13	cg13953753	118896012	5.46034e-06	0.000533059	0.522863	0.602304	0.591874	-0.0690115	0.0409914	0.0403938	0.0319251	0
chr16:89767253-89768882*N_Shore	16	chr16:89767253-89768882	N_Shore	SPATA2L	3.9461e-06	0.000121183	4	4	cg06271850	89766423	1.96669e-05	0.00152264	0.612827	0.573816	0.583845	0.0289824	0.0265007	0.032684	0.0229028	0
chr6:30881533-30882296*N_Shore	6	chr6:30881533-30882296	N_Shore	VARS2	3.96219e-06	0.000121233	21	21	cg02306936	30881316	5.6714e-06	0.000551525	0.762886	0.729241	0.732746	0.0301399	0.022263	0.0310794	0.0225122	0
chr6:30881533-30882296*N_Shore	6	chr6:30881533-30882296	N_Shore	GTF2H4	3.96219e-06	0.000121233	21	21	cg02306936	30881316	5.6714e-06	0.000551525	0.762886	0.729241	0.732746	0.0301399	0.022263	0.0310794	0.0225122	0
chr12:49504035-49504642*S_Shore	12	chr12:49504035-49504642	S_Shore	LMBR1L	4.0056e-06	0.000122455	6	5	cg04949149	49505053	3.46164e-07	5.54023e-05	0.370956	0.326508	0.32474	0.0462159	0.0379182	0.0506189	0.0259034	0
chr1:29213438-29214300*N_Shore	1	chr1:29213438-29214300	N_Shore	EPB41	4.11091e-06	0.000125587	4	4	cg21870545	29213106	1.2648e-07	2.33618e-05	0.381298	0.269759	0.27879	0.102508	0.0471756	0.0452153	0.0454515	0
chr6:32811494-32811839*N_Shelf	6	chr6:32811494-32811839	N_Shelf	PSMB8	4.12291e-06	0.000125674	12	9	cg12048225	32808669	1.43787e-07	2.61625e-05	0.248671	0.341709	0.329442	-0.0807709	0.0348216	0.070095	0.0460893	0
chr1:151693991-151694282*N_Shore	1	chr1:151693991-151694282	N_Shore	C1orf230	4.12444e-06	0.000125674	6	6	cg02959609	151693503	2.5316e-07	4.21803e-05	0.13488	0.0879507	0.0939837	0.0408965	0.0251109	0.016565	0.0219984	0
chr14:23449886-23452174*N_Shelf	14	chr14:23449886-23452174	N_Shelf	JUB	4.12757e-06	0.000125682	4	4	cg03508235	23445994	2.43592e-06	0.000274448	0.617504	0.593946	0.614371	0.00313314	0.0414877	0.0305912	0.0242165	0
chr6:30852102-30852676*S_Shore	6	chr6:30852102-30852676	S_Shore	DDR1	4.14258e-06	0.000125683	23	21	cg00934322	30854109	7.11733e-07	9.94569e-05	0.697205	0.795707	0.772527	-0.0753227	0.0516522	0.0404562	0.0450697	0
chr19:3576628-3578314*Island	19	chr19:3576628-3578314	Island	HMG20B	4.15067e-06	0.000125842	4	4	cg24229188	3576629	2.54632e-07	4.23692e-05	0.90041	0.825171	0.831609	0.0688009	0.0196248	0.0610133	0.0393563	0
chr6:33288733-33289008*N_Shore	6	chr6:33288733-33289008	N_Shore	DAXX	4.189e-06	0.000126503	23	23	cg22904406	33288296	1.00515e-05	0.000882066	0.58406	0.547415	0.562112	0.0219474	0.0482309	0.0411831	0.0525068	0
chr2:113956343-113957042*N_Shore	2	chr2:113956343-113957042	N_Shore	PSD4	4.20535e-06	0.00012691	4	4	cg18869127	113956255	3.45724e-07	5.53821e-05	0.77666	0.674602	0.682391	0.0942692	0.0448709	0.0640839	0.0477461	0
chr2:113956343-113957042*N_Shore	2	chr2:113956343-113957042	N_Shore	LOC440839	4.20535e-06	0.00012691	4	4	cg18869127	113956255	3.45724e-07	5.53821e-05	0.77666	0.674602	0.682391	0.0942692	0.0448709	0.0640839	0.0477461	0
chr6:10881846-10882051*Island	6	chr6:10881846-10882051	Island	GCM2	4.21284e-06	0.000127049	5	4	cg22851295	10881949	3.68284e-05	0.00253202	0.0593359	0.08825	0.0647188	-0.0053829	0.0224597	0.0191934	0.0141486	0
chr7:128470443-128471161*N_Shore	7	chr7:128470443-128471161	N_Shore	FLNC	4.25144e-06	0.000128081	5	5	cg25664034	128469891	3.98484e-07	6.22506e-05	0.275134	0.206564	0.220149	0.0549855	0.0410225	0.0362808	0.0240168	0
chr3:44596535-44597018*Island	3	chr3:44596535-44597018	Island	ZNF167	4.25433e-06	0.000128081	5	5	cg21867345	44596536	7.64093e-07	0.000105353	0.131041	0.194038	0.163983	-0.0329421	0.0232598	0.0218009	0.0219044	0
chr16:30076310-30077872*Island	16	chr16:30076310-30077872	Island	ALDOA	4.26517e-06	0.000128276	6	6	cg05048002	30077837	2.40006e-07	4.02707e-05	0.0992073	0.0546797	0.0661588	0.0330486	0.0231545	0.014189	0.0155055	0
chr10:23727836-23729523*Island	10	chr10:23727836-23729523	Island	OTUD1	4.34112e-06	0.000130427	6	6	cg06734577	23729522	4.25938e-07	6.52652e-05	0.242146	0.166183	0.184773	0.0573732	0.0267606	0.0232797	0.0233963	0
chr16:31580070-31580317*Island	16	chr16:31580070-31580317	Island	CSDAP1	4.36452e-06	0.00013094	3	3	cg06301178	31580150	3.39499e-07	5.45834e-05	0.339755	0.276727	0.254359	0.0853958	0.0464916	0.0423792	0.0288152	0
chr15:44068586-44069792*Island	15	chr15:44068586-44069792	Island	ELL3	4.36786e-06	0.00013094	11	10	cg24361265	44068668	5.12692e-07	7.57903e-05	0.637059	0.754624	0.778462	-0.141403	0.0859628	0.121227	0.0597581	0
chr1:32670569-32671885*Island	1	chr1:32670569-32671885	Island	CCDC28B	4.39505e-06	0.000131464	14	13	cg16512755	32670916	2.59677e-07	4.3046e-05	0.165307	0.123766	0.138371	0.0269364	0.0262279	0.0193103	0.0174336	0
chr1:32670569-32671885*Island	1	chr1:32670569-32671885	Island	IQCC	4.39505e-06	0.000131464	14	13	cg16512755	32670916	2.59677e-07	4.3046e-05	0.165307	0.123766	0.138371	0.0269364	0.0262279	0.0193103	0.0174336	0
chr10:685033-685407*N_Shelf	10	chr10:685033-685407	N_Shelf	DIP2C	4.42871e-06	0.000132292	8	8	cg25020678	682841	3.45092e-07	5.53312e-05	0.367976	0.282927	0.283408	0.0845687	0.0376989	0.0692503	0.0481702	0
chr3:134204520-134205439*S_Shore	3	chr3:134204520-134205439	S_Shore	CEP63	4.45218e-06	0.000132925	3	3	cg00511167	134206503	4.47224e-06	0.000451351	0.51657	0.455811	0.46863	0.0479395	0.0465762	0.0744755	0.0714161	0
chr9:140115986-140118466*Island	9	chr9:140115986-140118466	Island	RNF208	4.53217e-06	0.00013513	8	8	cg14404746	140116137	7.2144e-06	0.000673335	0.50448	0.445763	0.431002	0.0734777	0.0521125	0.0521739	0.0335617	0
chr17:53828422-53828738*N_Shore	17	chr17:53828422-53828738	N_Shore	PCTP	4.61928e-06	0.000137588	6	6	cg08264507	53827753	3.44942e-07	5.53312e-05	0.692891	0.604165	0.627328	0.0655631	0.0589917	0.0609294	0.0579136	0
chr16:89777018-89778789*Island	16	chr16:89777018-89778789	Island	C16orf7	4.67596e-06	0.000139135	6	6	cg01286935	89778247	1.89386e-05	0.00147663	0.115006	0.154599	0.158999	-0.0439938	0.0182555	0.0312761	0.0261157	0
chr12:53342805-53343162*S_Shore	12	chr12:53342805-53343162	S_Shore	KRT18	4.70583e-06	0.000139905	5	5	cg04799958	53343849	7.94148e-07	0.000108563	0.413244	0.480299	0.505248	-0.0920042	0.0454799	0.0622798	0.0482251	0
chr19:13915618-13915840*Island	19	chr19:13915618-13915840	Island	ZSWIM4	4.72465e-06	0.00014037	4	4	cg25751484	13915817	3.92734e-07	6.15913e-05	0.871149	0.845374	0.831597	0.0395518	0.0251078	0.0521635	0.0258135	0
chr16:30905549-30905783*S_Shore	16	chr16:30905549-30905783	S_Shore	CTF1	4.73302e-06	0.000140453	7	7	cg06159340	30907560	1.36231e-07	2.4902e-05	0.594544	0.46347	0.500269	0.0942751	0.0630125	0.0566774	0.0446774	0
chr19:45737482-45738145*Island	19	chr19:45737482-45738145	Island	EXOC3L2	4.76357e-06	0.000141169	9	8	cg02006647	45738115	3.47446e-07	5.55066e-05	0.57091	0.429952	0.428534	0.142376	0.0782466	0.0740585	0.0688025	0
chr16:19194883-19195209*Island	16	chr16:19194883-19195209	Island	SYT17	4.90685e-06	0.000145269	3	3	cg06142108	19195208	5.53899e-05	0.00348582	0.724897	0.69016	0.693349	0.0315486	0.0298495	0.0326909	0.0281371	0
chr18:44526866-44527137*N_Shore	18	chr18:44526866-44527137	N_Shore	KATNAL2	4.9645e-06	0.000146803	7	7	cg23345004	44526430	4.93025e-07	7.40004e-05	0.368515	0.321273	0.306427	0.0620888	0.0433699	0.0488601	0.0369307	0
chr10:72360255-72360605*S_Shelf	10	chr10:72360255-72360605	S_Shelf	PRF1	4.98201e-06	0.000147123	8	8	cg23364656	72362715	7.60755e-07	0.000105089	0.456078	0.513471	0.503162	-0.0470838	0.0371069	0.0285731	0.0355197	0
chr4:109092578-109092839*Island	4	chr4:109092578-109092839	Island	LOC641518	5.00031e-06	0.00014759	3	3	cg06214925	109092628	1.04362e-05	0.000909936	0.120135	0.145283	0.137956	-0.0178213	0.0153933	0.019653	0.0140264	0
chr21:45379516-45379816*Island	21	chr21:45379516-45379816	Island	AGPAT3	5.00519e-06	0.000147635	4	4	cg19191594	45379546	5.42944e-06	0.000530631	0.80954	0.834919	0.833014	-0.0234742	0.0176753	0.0190448	0.0178963	0
chr12:7023261-7024089*Island	12	chr12:7023261-7024089	Island	LRRC23	5.03465e-06	0.000148256	11	10	cg04604946	7023352	2.17097e-07	3.71768e-05	0.390502	0.308225	0.337769	0.0527335	0.0366096	0.0345918	0.029286	0
chr12:7023261-7024089*Island	12	chr12:7023261-7024089	Island	ENO2	5.03465e-06	0.000148256	11	10	cg04604946	7023352	2.17097e-07	3.71768e-05	0.390502	0.308225	0.337769	0.0527335	0.0366096	0.0345918	0.029286	0
chr1:166134258-166136448*S_Shore	1	chr1:166134258-166136448	S_Shore	FAM78B	5.15619e-06	0.000151708	5	5	cg19708554	166136816	2.33467e-06	0.000264903	0.324674	0.203465	0.241177	0.083497	0.0612206	0.0473023	0.0470246	0
chr3:66023373-66025595*Island	3	chr3:66023373-66025595	Island	MAGI1	5.17354e-06	0.000151939	15	11	cg10009157	66025586	5.34222e-05	0.00338724	0.107953	0.127454	0.129708	-0.0217559	0.0144617	0.0196659	0.015707	0
chr20:42219516-42219988*N_Shore	20	chr20:42219516-42219988	N_Shore	IFT52	5.21157e-06	0.000152979	3	3	cg03539340	42218758	5.19244e-07	7.66303e-05	0.546894	0.490629	0.497506	0.0493887	0.0437129	0.0818276	0.0395352	0
chr17:17685016-17687240*S_Shore	17	chr17:17685016-17687240	S_Shore	RAI1	5.22357e-06	0.000153255	3	3	cg01429256	17687834	2.35576e-06	0.000266953	0.343246	0.303174	0.315329	0.0279164	0.0307076	0.0290629	0.0256998	0
chr6:43970073-43970922*N_Shore	6	chr6:43970073-43970922	N_Shore	C6orf223	5.26045e-06	0.000154234	4	4	cg19274606	43968252	2.34713e-07	3.96159e-05	0.167951	0.125106	0.12582	0.0421312	0.0307222	0.0251249	0.0196822	0
chr12:133249979-133250243*N_Shore	12	chr12:133249979-133250243	N_Shore	POLE	5.30231e-06	0.000155281	7	7	cg15843572	133249005	4.02472e-07	6.25397e-05	0.424355	0.505231	0.510153	-0.0857974	0.0379171	0.0438305	0.037196	0
chr10:89419346-89420027*N_Shore	10	chr10:89419346-89420027	N_Shore	PAPSS2	5.40182e-06	0.000158021	4	4	cg26477576	89419292	2.32735e-07	3.94331e-05	0.214446	0.270169	0.276747	-0.0623004	0.0381335	0.0408339	0.0259224	0
chr8:8860200-8860742*N_Shore	8	chr8:8860200-8860742	N_Shore	ERI1	5.40215e-06	0.000158021	4	3	cg10039590	8859974	7.24357e-07	0.000100981	0.469543	0.416883	0.435313	0.0342303	0.0366278	0.0434539	0.0411447	0
chr1:45120237-45120723*Island	1	chr1:45120237-45120723	Island	TMEM53	5.44021e-06	0.000159002	5	5	cg14960316	45120521	0.000379758	0.0157157	0.683808	0.672833	0.683484	0.0003233	0.0345198	0.0295104	0.0247085	0
chr7:2563610-2564056*Island	7	chr7:2563610-2564056	Island	LFNG	5.49298e-06	0.000160438	4	4	cg03676485	2563816	8.39852e-07	0.000113231	0.455842	0.512484	0.505886	-0.0500436	0.0303905	0.0525519	0.0382907	0
chr14:101292043-101292709*N_Shore	14	chr14:101292043-101292709	N_Shore	MEG3	5.5695e-06	0.000162157	18	17	cg24089209	101291459	6.9337e-06	0.00065093	0.442694	0.467715	0.467537	-0.0248431	0.0164554	0.0233452	0.0185951	0
chr1:1607898-1608243*S_Shore	1	chr1:1607898-1608243	S_Shore	LOC728661	5.57023e-06	0.000162157	3	3	cg20251225	1609551	2.31699e-07	3.94092e-05	0.0797175	0.200293	0.181782	-0.102064	0.0172145	0.0702984	0.0542637	0
chr1:1607898-1608243*S_Shore	1	chr1:1607898-1608243	S_Shore	CDK11B	5.57023e-06	0.000162157	3	3	cg20251225	1609551	2.31699e-07	3.94092e-05	0.0797175	0.200293	0.181782	-0.102064	0.0172145	0.0702984	0.0542637	0
chr17:8113632-8113966*S_Shore	17	chr17:8113632-8113966	S_Shore	AURKB	5.5976e-06	0.000162819	5	5	cg17365525	8114504	3.87255e-07	6.08188e-05	0.556368	0.503271	0.492145	0.0642225	0.037047	0.0385018	0.0297297	0
chr12:130822360-130822696*S_Shore	12	chr12:130822360-130822696	S_Shore	PIWIL1	5.66262e-06	0.000164513	4	4	cg15606633	130824403	3.56751e-06	0.000374516	0.462999	0.395129	0.396807	0.0661913	0.0435387	0.067682	0.0314001	0
chr3:32544018-32544325*S_Shore	3	chr3:32544018-32544325	S_Shore	CMTM6	5.66329e-06	0.000164513	5	4	cg18113602	32544699	9.14657e-07	0.000122008	0.0720599	0.0362753	0.0540563	0.0180036	0.0236663	0.0151076	0.0175349	0
chr1:875730-878363*N_Shore	1	chr1:875730-878363	N_Shore	SAMD11	5.74381e-06	0.000166769	3	3	cg03269716	874896	3.02943e-07	4.92801e-05	0.608812	0.510318	0.552128	0.056684	0.0365143	0.0563547	0.0360211	0
chr17:73780846-73781308*N_Shore	17	chr17:73780846-73781308	N_Shore	UNK	5.81019e-06	0.000168308	11	11	cg26332052	73780035	9.31655e-07	0.0001239	0.562732	0.534121	0.549585	0.0131474	0.0323679	0.0472361	0.0290323	0
chr1:167522469-167523070*S_Shore	1	chr1:167522469-167523070	S_Shore	CREG1	5.82478e-06	0.000168457	7	7	cg22344162	167523769	4.31499e-07	6.60598e-05	0.372807	0.292247	0.31945	0.053357	0.0405174	0.0432089	0.037665	0
chr16:729438-735815*N_Shelf	16	chr16:729438-735815	N_Shelf	RHBDL1	5.82965e-06	0.000168457	8	8	cg03079132	727212	4.94099e-07	7.40984e-05	0.477235	0.392664	0.386778	0.0904564	0.0695597	0.0472823	0.0315284	0
chr19:18653766-18654531*S_Shore	19	chr19:18653766-18654531	S_Shore	FKBP8	5.89682e-06	0.000170314	3	3	cg10011232	18654949	2.27952e-07	3.88093e-05	0.150821	0.0870615	0.0991135	0.0517073	0.0332102	0.032813	0.0207795	0
chr19:13120986-13124368*Island	19	chr19:13120986-13124368	Island	NFIX	5.93705e-06	0.000171279	7	7	cg08647039	13120987	3.92873e-07	6.15913e-05	0.275314	0.33788	0.336072	-0.0607588	0.032747	0.0521346	0.0433731	0
chr22:21368197-21368771*S_Shore	22	chr22:21368197-21368771	S_Shore	MGC16703	5.95233e-06	0.00017158	5	5	cg05442902	21369010	6.66667e-06	0.000630226	0.277013	0.232764	0.251853	0.0251598	0.0263898	0.0219374	0.019859	0
chr22:21368197-21368771*S_Shore	22	chr22:21368197-21368771	S_Shore	P2RX6	5.95233e-06	0.00017158	5	5	cg05442902	21369010	6.66667e-06	0.000630226	0.277013	0.232764	0.251853	0.0251598	0.0263898	0.0219374	0.019859	0
chr11:1330390-1331498*S_Shore	11	chr11:1330390-1331498	S_Shore	TOLLIP	5.99034e-06	0.000172562	4	4	cg04699162	1331784	6.53173e-06	0.00062147	0.746635	0.697711	0.699522	0.0471131	0.0377404	0.0493624	0.0356973	0
chr11:1330390-1331498*S_Shore	11	chr11:1330390-1331498	S_Shore	LOC255512	5.99034e-06	0.000172562	4	4	cg04699162	1331784	6.53173e-06	0.00062147	0.746635	0.697711	0.699522	0.0471131	0.0377404	0.0493624	0.0356973	0
chr19:56028236-56028824*Island	19	chr19:56028236-56028824	Island	SSC5D	6.03971e-06	0.000173871	4	4	cg02889672	56028812	1.03983e-06	0.000135726	0.258304	0.152206	0.179007	0.0792971	0.0497423	0.0452047	0.0383593	0
chr13:114085423-114085682*N_Shore	13	chr13:114085423-114085682	N_Shore	ADPRHL1	6.0487e-06	0.000173988	5	5	cg01421309	114084041	2.98319e-07	4.86732e-05	0.2269	0.284919	0.287865	-0.0609652	0.0414227	0.045532	0.0370483	0
chr13:114260191-114260565*S_Shore	13	chr13:114260191-114260565	S_Shore	TFDP1	6.05812e-06	0.000174173	3	3	cg21598343	114261986	5.88979e-07	8.5209e-05	0.293628	0.331602	0.343212	-0.0495844	0.032695	0.0347028	0.0424396	0
chr20:36148603-36150136*N_Shore	20	chr20:36148603-36150136	N_Shore	BLCAP	6.08351e-06	0.000174561	13	12	cg22378853	36148154	1.42518e-05	0.00117023	0.575396	0.630298	0.63881	-0.0634139	0.0323888	0.0534672	0.0374415	0
chr20:36148603-36150136*N_Shore	20	chr20:36148603-36150136	N_Shore	NNAT	6.08351e-06	0.000174561	13	12	cg22378853	36148154	1.42518e-05	0.00117023	0.575396	0.630298	0.63881	-0.0634139	0.0323888	0.0534672	0.0374415	0
chr22:47456900-47457161*Island	22	chr22:47456900-47457161	Island	TBC1D22A	6.1291e-06	0.000175784	3	3	cg00651185	47457016	2.21541e-07	3.79009e-05	0.72937	0.801394	0.819704	-0.0903338	0.0465203	0.037161	0.0279908	0
chr16:28303973-28304770*N_Shore	16	chr16:28303973-28304770	N_Shore	SBK1	6.14952e-06	0.000176213	4	4	cg05683445	28303182	3.41457e-06	0.000362461	0.279729	0.2259	0.238333	0.0413959	0.0235028	0.03345	0.0185107	0
chr1:14924610-14925993*N_Shore	1	chr1:14924610-14925993	N_Shore	KIAA1026	6.15106e-06	0.000176213	3	3	cg17897187	14923736	1.19633e-06	0.000151847	0.549675	0.659878	0.671922	-0.122247	0.0759326	0.0546013	0.0595747	0
chr1:9749295-9750228*N_Shore	1	chr1:9749295-9750228	N_Shore	PIK3CD	6.24382e-06	0.000178783	3	3	cg11980800	9748107	1.62398e-05	0.0013037	0.529073	0.372456	0.396269	0.132805	0.0607057	0.0598318	0.0562425	0
chr10:27149166-27150229*S_Shore	10	chr10:27149166-27150229	S_Shore	ABI1	6.25361e-06	0.000178976	3	3	cg06960024	27150529	0.000157661	0.0079195	0.715549	0.688502	0.671097	0.0444518	0.0311174	0.0462633	0.034786	0
chr1:2990030-2990718*Island	1	chr1:2990030-2990718	Island	PRDM16	6.29615e-06	0.000180076	4	4	cg17001566	2990490	4.42393e-06	0.0004475	0.355939	0.196745	0.209336	0.146602	0.0740184	0.0584424	0.0601849	0
chr10:48413741-48413968*S_Shelf	10	chr10:48413741-48413968	S_Shelf	GDF2	6.31687e-06	0.000180318	13	12	cg15247509	48416977	6.77311e-07	9.55562e-05	0.828999	0.793628	0.792265	0.0367342	0.041441	0.0469456	0.048523	0
chr19:12175460-12176057*N_Shore	19	chr19:12175460-12176057	N_Shore	ZNF844	6.32841e-06	0.000180352	3	3	cg12210543	12175107	2.34141e-05	0.00175269	0.562161	0.48973	0.507535	0.0546264	0.0589653	0.0563839	0.0536087	0
chr5:40679502-40682081*Island	5	chr5:40679502-40682081	Island	PTGER4	6.33854e-06	0.000180352	17	17	cg04092800	40681444	6.95889e-07	9.77684e-05	0.293788	0.178083	0.200787	0.0930014	0.0531114	0.044747	0.042903	0
chr11:66444997-66445471*N_Shore	11	chr11:66444997-66445471	N_Shore	RBM4B	6.40275e-06	0.000181944	8	8	cg03260799	66444738	3.64462e-05	0.00250962	0.329635	0.276761	0.276757	0.0528778	0.0272527	0.0339217	0.0213231	0
chr1:16070628-16070853*N_Shelf	1	chr1:16070628-16070853	N_Shelf	TMEM82	6.4217e-06	0.000182365	4	4	cg21921789	16067572	0.000456742	0.0180182	0.503607	0.488147	0.48227	0.0213369	0.0428378	0.058105	0.0300254	0
chr1:16070628-16070853*N_Shelf	1	chr1:16070628-16070853	N_Shelf	SLC25A34	6.4217e-06	0.000182365	4	4	cg21921789	16067572	0.000456742	0.0180182	0.503607	0.488147	0.48227	0.0213369	0.0428378	0.058105	0.0300254	0
chr15:59981234-59981795*S_Shore	15	chr15:59981234-59981795	S_Shore	BNIP2	6.45766e-06	0.000183297	3	3	cg20468883	59982396	7.10291e-07	9.93342e-05	0.34664	0.291962	0.320881	0.0257585	0.0506241	0.0511015	0.0404653	0
chr20:62168432-62168684*S_Shore	20	chr20:62168432-62168684	S_Shore	PTK6	6.52591e-06	0.000184797	8	8	cg14010720	62168878	6.71573e-05	0.00407762	0.314772	0.237681	0.276601	0.0381709	0.056581	0.0445053	0.043686	0
chr6:30688624-30689530*Island	6	chr6:30688624-30689530	Island	TUBB	6.54748e-06	0.000184797	25	25	cg02831473	30688676	0.00368672	0.0826621	0.00745162	0.00510859	0.005307	0.00214462	0.00464828	0.00387008	0.00384599	0
chr16:67875717-67876740*S_Shore	16	chr16:67875717-67876740	S_Shore	CENPT	6.54929e-06	0.000184797	4	4	cg00496272	67877232	1.45302e-06	0.000180818	0.18099	0.132214	0.132301	0.0486887	0.0296852	0.0230085	0.017147	0
chr16:67875717-67876740*S_Shore	16	chr16:67875717-67876740	S_Shore	THAP11	6.54929e-06	0.000184797	4	4	cg00496272	67877232	1.45302e-06	0.000180818	0.18099	0.132214	0.132301	0.0486887	0.0296852	0.0230085	0.017147	0
chr16:10972782-10973305*Island	16	chr16:10972782-10973305	Island	CIITA	6.57513e-06	0.000185437	3	3	cg09959112	10973301	2.12854e-07	3.65925e-05	0.152623	0.0777122	0.0921238	0.0604988	0.0402688	0.0224283	0.0219716	0
chr16:1414417-1414851*S_Shore	16	chr16:1414417-1414851	S_Shore	UNKL	6.58197e-06	0.000185452	6	6	cg27617724	1416030	8.37755e-06	0.000759371	0.50759	0.533385	0.543947	-0.0363567	0.0263623	0.024915	0.0303415	0
chr1:208084098-208084513*S_Shore	1	chr1:208084098-208084513	S_Shore	CD34	6.63201e-06	0.000186713	5	5	cg03583857	208085022	4.27806e-06	0.000434992	0.27232	0.296751	0.307591	-0.0352708	0.0310746	0.0366593	0.0313657	0
chr4:171010943-171011503*S_Shore	4	chr4:171010943-171011503	S_Shore	AADAT	6.68235e-06	0.00018804	3	3	cg02602915	171011615	4.06283e-07	6.291e-05	0.127687	0.0982562	0.0984682	0.0292191	0.0215939	0.0148112	0.0161316	0
chr1:156261199-156261425*Island	1	chr1:156261199-156261425	Island	TMEM79	6.72881e-06	0.000189136	5	4	cg20570016	156261298	2.92296e-07	4.7779e-05	0.40699	0.360956	0.368697	0.0382932	0.0344688	0.0527897	0.0363906	0
chr6:27782247-27782485*S_Shore	6	chr6:27782247-27782485	S_Shore	HIST1H2AJ	6.77717e-06	0.000190222	9	9	cg03221914	27783331	5.6044e-07	8.19549e-05	0.690443	0.634542	0.630636	0.059807	0.0544662	0.0611669	0.0406374	0
chr16:29826662-29828302*S_Shelf	16	chr16:29826662-29828302	S_Shelf	MVP	6.78465e-06	0.00019025	6	6	cg15777760	29832180	1.96673e-06	0.000231349	0.450534	0.389818	0.398738	0.0517966	0.0507722	0.0394895	0.0404011	0
chr16:29826662-29828302*S_Shelf	16	chr16:29826662-29828302	S_Shelf	C16orf53	6.78465e-06	0.00019025	6	6	cg15777760	29832180	1.96673e-06	0.000231349	0.450534	0.389818	0.398738	0.0517966	0.0507722	0.0394895	0.0404011	0
chr11:3818447-3819307*N_Shore	11	chr11:3818447-3819307	N_Shore	NUP98	6.80135e-06	0.000190566	5	5	cg17344149	3817692	4.11598e-06	0.000422658	0.213818	0.146956	0.167388	0.0464302	0.0371121	0.035345	0.0332487	0
chr11:3818447-3819307*N_Shore	11	chr11:3818447-3819307	N_Shore	PGAP2	6.80135e-06	0.000190566	5	5	cg17344149	3817692	4.11598e-06	0.000422658	0.213818	0.146956	0.167388	0.0464302	0.0371121	0.035345	0.0332487	0
chr3:48470230-48471389*S_Shore	3	chr3:48470230-48471389	S_Shore	PLXNB1	6.80622e-06	0.000190582	5	4	cg01189606	48471901	8.0457e-06	0.000736489	0.473787	0.534605	0.5383	-0.0645127	0.0515732	0.0515201	0.0396313	0
chr10:131686365-131686595*N_Shelf	10	chr10:131686365-131686595	N_Shelf	EBF3	6.91077e-06	0.000193325	6	6	cg19074393	131682452	0.000404257	0.01644	0.388129	0.422759	0.450498	-0.0623692	0.043193	0.0478955	0.0493744	0
chr6:35108801-35109499*Island	6	chr6:35108801-35109499	Island	TCP11	6.92676e-06	0.000193496	10	9	cg07923390	35109242	1.24291e-05	0.00104742	0.733698	0.845559	0.802413	-0.0687149	0.0420976	0.0516046	0.0464354	0
chr16:11945065-11945517*S_Shore	16	chr16:11945065-11945517	S_Shore	RSL1D1	6.93506e-06	0.000193605	4	4	cg05337711	11946064	3.20962e-06	0.000344021	0.41687	0.304713	0.3014	0.11547	0.0761008	0.0899157	0.0636096	0
chr13:25086522-25087067*N_Shore	13	chr13:25086522-25087067	N_Shore	PARP4	7.01202e-06	0.000195598	5	5	cg18582260	25085301	3.76851e-07	5.96097e-05	0.271686	0.172818	0.17492	0.0967655	0.0500161	0.0458625	0.0515578	0
chr10:135191594-135193307*N_Shore	10	chr10:135191594-135193307	N_Shore	PAOX	7.11792e-06	0.000198333	7	7	cg20534287	135191450	8.25109e-05	0.0048048	0.676861	0.628709	0.637161	0.0396996	0.0382831	0.0475634	0.0293904	0
chr19:46996327-46998437*S_Shore	19	chr19:46996327-46998437	S_Shore	PNMAL2	7.12572e-06	0.000198393	5	5	cg04255201	46999307	0.0237236	0.277507	0.269297	0.3017	0.284667	-0.0153694	0.0264373	0.0291869	0.0158442	0
chr11:858575-858932*S_Shore	11	chr11:858575-858932	S_Shore	TSPAN4	7.25734e-06	0.000201856	6	5	cg18028767	859873	2.09205e-06	0.000241854	0.152705	0.120314	0.129703	0.023002	0.0249249	0.0207683	0.0186841	0
chr12:54447744-54448091*N_Shore	12	chr12:54447744-54448091	N_Shore	HOXC4	7.27417e-06	0.000201856	18	16	cg25975485	54446537	8.10934e-07	0.000110515	0.440077	0.366927	0.347884	0.0921931	0.075369	0.0670444	0.0583303	0
chr21:46714984-46715206*N_Shore	21	chr21:46714984-46715206	N_Shore	LOC642852	7.41623e-06	0.000205701	3	3	cg02837600	46714458	4.2323e-05	0.00281744	0.633188	0.543756	0.536071	0.0971165	0.0553197	0.077181	0.0596385	0
chr16:85676291-85676592*Island	16	chr16:85676291-85676592	Island	KIAA0182	7.44871e-06	0.000206472	4	4	cg01582532	85676526	1.59408e-05	0.00128497	0.559256	0.610345	0.603387	-0.044131	0.0412762	0.0383503	0.0385903	0
chr20:62317505-62317775*Island	20	chr20:62317505-62317775	Island	RTEL1	7.49226e-06	0.000207582	3	3	cg08432509	62317768	1.31781e-06	0.000166103	0.575429	0.642573	0.65106	-0.0756306	0.0465112	0.0510789	0.0317834	0
chr17:7517690-7518748*N_Shore	17	chr17:7517690-7518748	N_Shore	SHBG	7.51996e-06	0.00020812	7	7	cg17832704	7516888	2.33298e-06	0.000264882	0.60917	0.524714	0.557575	0.0515956	0.0246189	0.0352273	0.0335549	0
chr17:7517690-7518748*N_Shore	17	chr17:7517690-7518748	N_Shore	FXR2	7.51996e-06	0.00020812	7	7	cg17832704	7516888	2.33298e-06	0.000264882	0.60917	0.524714	0.557575	0.0515956	0.0246189	0.0352273	0.0335549	0
chr10:135191594-135193307*Island	10	chr10:135191594-135193307	Island	PAOX	7.57536e-06	0.0002088	25	23	cg26188501	135191639	3.34238e-07	5.3885e-05	0.144471	0.0820989	0.0818659	0.0626055	0.0409027	0.0240378	0.0282268	0
chr2:95690857-95692431*Island	2	chr2:95690857-95692431	Island	MAL	7.60125e-06	0.000209166	9	9	cg09983051	95691228	0.000140021	0.00723185	0.0827684	0.0970722	0.0944229	-0.0116545	0.013268	0.0143597	0.0130964	0
chr1:82265998-82269048*S_Shore	1	chr1:82265998-82269048	S_Shore	LPHN2	7.60286e-06	0.000209166	3	3	cg14529474	82269526	1.97973e-06	0.000232103	0.143653	0.112966	0.112537	0.0311155	0.0192599	0.0177874	0.0182671	0
chr2:237416090-237416382*N_Shelf	2	chr2:237416090-237416382	N_Shelf	IQCA1	7.64212e-06	0.000210075	3	3	cg26496293	237412439	1.04691e-06	0.000136166	0.71828	0.684329	0.686041	0.0322391	0.0274312	0.0338818	0.0253881	0
chr17:43224933-43227616*N_Shore	17	chr17:43224933-43227616	N_Shore	HEXIM1	7.6502e-06	0.000210075	9	9	cg15804598	43224418	2.71102e-06	0.000299694	0.525932	0.482713	0.50294	0.0229919	0.0322374	0.0387406	0.0305235	0
chr2:28113060-28113764*S_Shore	2	chr2:28113060-28113764	S_Shore	RBKS	7.67721e-06	0.000210554	8	8	cg08364093	28114164	2.8371e-07	4.65917e-05	0.136212	0.0997558	0.11176	0.0244519	0.0343589	0.0222408	0.0259145	0
chr2:28113060-28113764*S_Shore	2	chr2:28113060-28113764	S_Shore	BRE	7.67721e-06	0.000210554	8	8	cg08364093	28114164	2.8371e-07	4.65917e-05	0.136212	0.0997558	0.11176	0.0244519	0.0343589	0.0222408	0.0259145	0
chr2:28113060-28113764*S_Shore	2	chr2:28113060-28113764	S_Shore	LOC100302650	7.67721e-06	0.000210554	8	8	cg08364093	28114164	2.8371e-07	4.65917e-05	0.136212	0.0997558	0.11176	0.0244519	0.0343589	0.0222408	0.0259145	0
chr6:31867691-31867957*Island	6	chr6:31867691-31867957	Island	ZBTB12	7.80594e-06	0.000213519	17	17	cg04603811	31867873	5.1595e-05	0.00329287	0.692826	0.80781	0.79806	-0.105234	0.0521437	0.0381915	0.053135	0
chr20:62084467-62084903*Island	20	chr20:62084467-62084903	Island	KCNQ2	7.81093e-06	0.000213557	3	3	cg20964064	62084549	0.119274	0.613161	0.478405	0.510399	0.518308	-0.039903	0.0572728	0.0724822	0.0570013	0
chr19:13228886-13229576*N_Shore	19	chr19:13228886-13229576	N_Shore	NACC1	7.84076e-06	0.000214239	4	4	cg12014333	13228096	9.11019e-07	0.000121615	0.154246	0.101736	0.098055	0.0561913	0.0373877	0.0354234	0.0291489	0
chr19:13228886-13229576*N_Shore	19	chr19:13228886-13229576	N_Shore	TRMT1	7.84076e-06	0.000214239	4	4	cg12014333	13228096	9.11019e-07	0.000121615	0.154246	0.101736	0.098055	0.0561913	0.0373877	0.0354234	0.0291489	0
chr1:27894927-27895524*Island	1	chr1:27894927-27895524	Island	AHDC1	7.89272e-06	0.000215415	3	3	cg04911680	27895490	9.5952e-06	0.000849211	0.324706	0.28422	0.29544	0.0292664	0.0277845	0.0366381	0.0216262	0
chr19:49242018-49242962*S_Shore	19	chr19:49242018-49242962	S_Shore	RASIP1	7.89478e-06	0.000215415	6	6	cg23082877	49243427	0.00628219	0.119778	0.253196	0.294763	0.283399	-0.0302036	0.0342809	0.0341553	0.0294197	0
chr17:42082027-42084972*N_Shore	17	chr17:42082027-42084972	N_Shore	NAGS	7.92578e-06	0.000215993	8	8	cg07739179	42081810	1.04147e-06	0.000135749	0.250142	0.339464	0.296253	-0.0461105	0.0296664	0.042237	0.0372989	0
chr17:42082027-42084972*N_Shore	17	chr17:42082027-42084972	N_Shore	PYY	7.92578e-06	0.000215993	8	8	cg07739179	42081810	1.04147e-06	0.000135749	0.250142	0.339464	0.296253	-0.0461105	0.0296664	0.042237	0.0372989	0
chr8:104383409-104384109*S_Shore	8	chr8:104383409-104384109	S_Shore	CTHRC1	7.97803e-06	0.000217316	3	3	cg18919478	104384584	4.05202e-07	6.2804e-05	0.67972	0.731735	0.746256	-0.0665361	0.0394863	0.0425224	0.0216527	0
chr10:94820026-94823252*Island	10	chr10:94820026-94823252	Island	CYP26C1	8.02767e-06	0.000218129	16	16	cg20322977	94821085	8.19658e-07	0.000111334	0.27105	0.329641	0.324176	-0.0531254	0.0256272	0.048871	0.0280054	0
chr1:116380359-116382364*Island	1	chr1:116380359-116382364	Island	NHLH2	8.08317e-06	0.000219197	14	13	cg21863110	116380417	5.04572e-07	7.51151e-05	0.352112	0.44659	0.404991	-0.0528788	0.0311689	0.0400145	0.0298113	0
chr10:120101564-120101937*S_Shore	10	chr10:120101564-120101937	S_Shore	C10orf84	8.198e-06	0.000222048	4	4	cg11200042	120102309	4.34264e-06	0.000440288	0.76022	0.7195	0.722157	0.0380628	0.0293776	0.040679	0.0340426	0
chr6:44355156-44355778*N_Shore	6	chr6:44355156-44355778	N_Shore	CDC5L	8.19966e-06	0.000222048	5	5	cg18138826	44354646	9.92808e-06	0.000873379	0.708687	0.636677	0.643222	0.0654647	0.0350251	0.0472892	0.0432404	0
chr6:26156449-26157146*S_Shelf	6	chr6:26156449-26157146	S_Shelf	HIST1H2BD	8.33199e-06	0.000225528	3	3	cg24996758	26160318	4.46907e-06	0.000451289	0.560457	0.493765	0.482321	0.0781359	0.0599562	0.0779519	0.0487584	0
chr17:13503829-13505559*S_Shore	17	chr17:13503829-13505559	S_Shore	HS3ST3A1	8.39913e-06	0.000226972	6	6	cg00203913	13506186	3.39515e-05	0.00236936	0.326997	0.433248	0.416202	-0.0892051	0.0681727	0.0870496	0.0555475	0
chr5:159826808-159827111*S_Shore	5	chr5:159826808-159827111	S_Shore	C5orf54	8.53284e-06	0.000229932	5	5	cg25502093	159827333	1.16798e-05	0.000994734	0.139154	0.0920533	0.104836	0.0343179	0.0211009	0.0238666	0.0190021	0
chr12:6756001-6756679*Island	12	chr12:6756001-6756679	Island	ACRBP	8.53949e-06	0.000229932	5	5	cg12007596	6756678	5.91606e-07	8.55188e-05	0.124208	0.100126	0.0883657	0.0358427	0.0224501	0.0220698	0.0176178	0
chr10:135014703-135015402*N_Shore	10	chr10:135014703-135015402	N_Shore	KNDC1	8.54165e-06	0.000229932	3	3	cg19817820	135013791	7.72483e-07	0.000106261	0.62127	0.542786	0.536233	0.085037	0.0313212	0.0637607	0.0460906	0
chr10:16561604-16563822*Island	10	chr10:16561604-16563822	Island	C1QL3	8.56751e-06	0.000230346	8	8	cg27177554	16562102	3.82982e-07	6.03628e-05	0.138667	0.22726	0.2084	-0.0697326	0.0551593	0.0523346	0.068079	0
chr1:150980735-150981092*N_Shore	1	chr1:150980735-150981092	N_Shore	PRUNE	8.61524e-06	0.000231347	9	8	cg09028383	150980411	3.40295e-07	5.46615e-05	0.418057	0.380276	0.386376	0.0316807	0.0342009	0.0311639	0.0278648	0
chr1:150980735-150981092*N_Shore	1	chr1:150980735-150981092	N_Shore	FAM63A	8.61524e-06	0.000231347	9	8	cg09028383	150980411	3.40295e-07	5.46615e-05	0.418057	0.380276	0.386376	0.0316807	0.0342009	0.0311639	0.0278648	0
chr12:72056768-72057787*S_Shore	12	chr12:72056768-72057787	S_Shore	THAP2	8.69667e-06	0.000233356	6	5	cg05157098	72059293	2.47363e-05	0.00183227	0.480461	0.311754	0.391125	0.0893354	0.0388955	0.0580963	0.0620136	0
chr17:27918161-27918398*N_Shore	17	chr17:27918161-27918398	N_Shore	GIT1	8.73423e-06	0.000234257	3	3	cg08217285	27917879	1.77937e-06	0.000213295	0.358812	0.286807	0.310991	0.047821	0.036682	0.0601903	0.0329648	0
chr17:79084336-79084561*N_Shore	17	chr17:79084336-79084561	N_Shore	BAIAP2	8.7516e-06	0.000234544	5	5	cg27551910	79083905	6.89517e-07	9.72004e-05	0.418898	0.461438	0.470879	-0.0519805	0.0365038	0.0438011	0.035537	0
chr8:142367050-142367860*S_Shore	8	chr8:142367050-142367860	S_Shore	GPR20	8.88117e-06	0.000237763	8	7	cg08224569	142369705	1.40116e-05	0.00115428	0.544933	0.415087	0.416301	0.128631	0.0748181	0.0938421	0.0717569	0
chr18:11851209-11852122*N_Shore	18	chr18:11851209-11852122	N_Shore	CHMP1B	8.91112e-06	0.00023842	4	4	cg18848419	11850153	9.86232e-07	0.000130176	0.273738	0.198929	0.180863	0.092875	0.0468019	0.0699875	0.0523677	0
chr18:11851209-11852122*N_Shore	18	chr18:11851209-11852122	N_Shore	GNAL	8.91112e-06	0.00023842	4	4	cg18848419	11850153	9.86232e-07	0.000130176	0.273738	0.198929	0.180863	0.092875	0.0468019	0.0699875	0.0523677	0
chr17:6358414-6358955*Island	17	chr17:6358414-6358955	Island	PITPNM3	8.9759e-06	0.000239971	5	5	cg10235355	6358830	0.00123687	0.0382776	0.124665	0.142544	0.122078	0.00258719	0.0270469	0.0246367	0.020498	0
chr22:19165061-19166816*Island	22	chr22:19165061-19166816	Island	SLC25A1	9.03282e-06	0.000241237	9	7	cg00747849	19165386	1.67946e-06	0.000203394	0.331994	0.288325	0.287508	0.0444857	0.0257637	0.0368521	0.0214912	0
chr5:176860862-176861098*Island	5	chr5:176860862-176861098	Island	GRK6	9.053e-06	0.00024163	4	4	cg18034719	176860863	3.49005e-07	5.57051e-05	0.741497	0.809079	0.800733	-0.0592356	0.0261411	0.0275196	0.0187428	0
chr7:813627-814392*S_Shore	7	chr7:813627-814392	S_Shore	HEATR2	9.31558e-06	0.000248412	6	6	cg13093285	814447	9.92606e-07	0.000130821	0.747533	0.821601	0.826039	-0.0785056	0.0502892	0.0388254	0.0297836	0
chr9:123638820-123639936*S_Shore	9	chr9:123638820-123639936	S_Shore	PHF19	9.33861e-06	0.000248913	3	3	cg02388253	123640363	5.87194e-07	8.50205e-05	0.228297	0.161994	0.198147	0.0301507	0.0354892	0.0311686	0.0270907	0
chr2:202483584-202483957*S_Shore	2	chr2:202483584-202483957	S_Shore	ALS2CR11	9.50747e-06	0.000252993	7	7	cg16091995	202484320	3.58749e-07	5.70023e-05	0.636891	0.563375	0.576204	0.0606869	0.0354368	0.0800523	0.0352543	0
chr11:16946392-16947398*Island	11	chr11:16946392-16947398	Island	PLEKHA7	9.52041e-06	0.000253223	3	3	cg27267310	16946393	1.32766e-06	0.000167225	0.391028	0.480129	0.458241	-0.0672133	0.0400894	0.0371878	0.0329939	0
chr1:228134422-228136282*S_Shore	1	chr1:228134422-228136282	S_Shore	WNT9A	9.57732e-06	0.000254621	3	3	cg26146562	228136982	9.34638e-07	0.000124203	0.593445	0.541511	0.551609	0.0418359	0.0280531	0.0547873	0.0311157	0
chr19:2278605-2278848*S_Shelf	19	chr19:2278605-2278848	S_Shelf	C19orf35	9.73708e-06	0.00025823	9	9	cg20973210	2282729	9.62094e-06	0.000850295	0.0715598	0.099841	0.0964142	-0.0248543	0.0180015	0.0242091	0.019888	0
chr7:44184770-44185695*N_Shelf	7	chr7:44184770-44185695	N_Shelf	MYL7	9.77606e-06	0.00025823	6	5	cg03991477	44181092	0.000670233	0.024261	0.704127	0.680394	0.708109	-0.00398132	0.0436946	0.0545767	0.0292132	0
chr6:31632815-31634093*N_Shore	6	chr6:31632815-31634093	N_Shore	CSNK2B	9.78192e-06	0.00025823	21	19	cg17422460	31632171	2.95284e-05	0.00211944	0.382536	0.342462	0.333846	0.0486897	0.0376384	0.0314561	0.0336021	0
chr6:31632815-31634093*N_Shore	6	chr6:31632815-31634093	N_Shore	BAT4	9.78192e-06	0.00025823	21	19	cg17422460	31632171	2.95284e-05	0.00211944	0.382536	0.342462	0.333846	0.0486897	0.0376384	0.0314561	0.0336021	0
chr15:91473314-91473592*Island	15	chr15:91473314-91473592	Island	UNC45A	9.83488e-06	0.000258765	5	5	cg01351822	91473475	2.004e-06	0.00023417	0.203035	0.0349633	0.0759858	0.127049	0.0950335	0.0460719	0.0639599	0
chr17:80022655-80024178*Island	17	chr17:80022655-80024178	Island	DUS1L	9.83819e-06	0.000258765	10	10	cg10000250	80023016	9.65905e-07	0.000127684	0.622486	0.547204	0.53972	0.082766	0.0334029	0.0530928	0.0429191	0
chr17:7348274-7348830*S_Shore	17	chr17:7348274-7348830	S_Shore	CHRNB1	9.83965e-06	0.000258765	5	5	cg17107156	7350244	5.63315e-06	0.000548411	0.36092	0.288458	0.280086	0.0808341	0.0422116	0.0499788	0.0469027	0
chr14:92979726-92981228*Island	14	chr14:92979726-92981228	Island	RIN3	9.85514e-06	0.000258765	8	7	cg12072028	92981227	5.81419e-07	8.43924e-05	0.759725	0.692456	0.678274	0.0814509	0.0672014	0.124337	0.085043	0
chr3:57541931-57543244*Island	3	chr3:57541931-57543244	Island	PDE12	9.858e-06	0.000258765	11	11	cg04411156	57543029	1.08583e-06	0.000140375	0.0697121	0.0558706	0.0517315	0.0179807	0.0172975	0.0166396	0.00795548	0
chr1:38157295-38158586*N_Shore	1	chr1:38157295-38158586	N_Shore	C1orf109	9.90731e-06	0.000259595	9	8	cg22449745	38156939	0.000517444	0.0198691	0.57765	0.539666	0.530473	0.0471769	0.0529921	0.0600139	0.0400838	0
chr1:38157295-38158586*N_Shore	1	chr1:38157295-38158586	N_Shore	CDCA8	9.90731e-06	0.000259595	9	8	cg22449745	38156939	0.000517444	0.0198691	0.57765	0.539666	0.530473	0.0471769	0.0529921	0.0600139	0.0400838	0
chr1:32713918-32714186*S_Shelf	1	chr1:32713918-32714186	S_Shelf	LCK	1.00863e-05	0.000264047	6	6	cg05350315	32716961	2.33978e-06	0.000265312	0.384692	0.456933	0.428421	-0.043729	0.0314783	0.0399055	0.0425396	0
chr21:31311386-31312106*S_Shore	21	chr21:31311386-31312106	S_Shore	GRIK1	1.00937e-05	0.000264047	5	5	cg07950000	31312333	1.2483e-05	0.00105095	0.159781	0.17761	0.158147	0.00163383	0.0359698	0.0269963	0.0259836	0
chr10:5488484-5488686*N_Shore	10	chr10:5488484-5488686	N_Shore	NET1	1.01997e-05	0.000266622	5	5	cg01010839	5488225	0.00246243	0.0625588	0.736113	0.693469	0.709747	0.0263661	0.0519064	0.0720196	0.0487134	0
chr18:31802358-31803792*Island	18	chr18:31802358-31803792	Island	NOL4	1.02689e-05	0.000268112	8	8	cg22095604	31803241	1.11413e-06	0.000143301	0.190883	0.228352	0.193936	-0.00305285	0.0453465	0.0345044	0.0320812	0
chr15:91499952-91500818*Island	15	chr15:91499952-91500818	Island	RCCD1	1.03171e-05	0.000269211	4	4	cg14696334	91500193	5.09828e-07	7.56357e-05	0.413351	0.297644	0.291508	0.121843	0.0589321	0.0640573	0.0582379	0
chr4:148402198-148402760*Island	4	chr4:148402198-148402760	Island	EDNRA	1.04853e-05	0.000273439	4	4	cg04045079	148402408	3.59282e-05	0.00248467	0.156748	0.189988	0.164485	-0.00773682	0.0310472	0.0220294	0.0261517	0
chr3:127391011-127392434*Island	3	chr3:127391011-127392434	Island	ABTB1	1.0533e-05	0.000274402	5	4	cg03330058	127392403	5.00516e-07	7.48062e-05	0.37352	0.284091	0.296639	0.0768814	0.0486562	0.0506983	0.0379194	0
chr12:110271000-110271582*Island	12	chr12:110271000-110271582	Island	TRPV4	1.05468e-05	0.000274402	5	5	cg03312716	110271581	4.13362e-05	0.00276623	0.474492	0.460809	0.43793	0.0365624	0.0364953	0.0524983	0.0227785	0
chr2:27603350-27604064*Island	2	chr2:27603350-27604064	Island	ZNF513	1.05518e-05	0.000274402	11	10	cg00719165	27603886	2.01814e-05	0.00155292	0.273539	0.216049	0.208386	0.0651531	0.0416905	0.0326992	0.0322128	0
chr8:1616521-1616876*N_Shore	8	chr8:1616521-1616876	N_Shore	DLGAP2	1.05711e-05	0.00027466	7	6	cg04687241	1616381	1.36257e-06	0.000170647	0.523667	0.585679	0.609823	-0.0861559	0.0375723	0.0527898	0.0394375	0
chr16:46917849-46918957*S_Shore	16	chr16:46917849-46918957	S_Shore	GPT2	1.07538e-05	0.000279159	6	6	cg04839706	46920075	0.00559048	0.110611	0.809783	0.83203	0.835962	-0.0261791	0.0325724	0.0265466	0.0362241	0
chr19:38746638-38747379*Island	19	chr19:38746638-38747379	Island	PPP1R14A	1.08672e-05	0.000281398	12	11	cg08196968	38746749	3.79873e-06	0.000395147	0.175311	0.317448	0.274139	-0.0988278	0.0648827	0.0629622	0.0527445	0
chr10:25463756-25465639*Island	10	chr10:25463756-25465639	Island	GPR158	1.09351e-05	0.000282105	23	23	cg14971895	25465352	6.28146e-06	0.000601229	0.18856	0.225998	0.20309	-0.0145298	0.0281559	0.0213465	0.0229359	0
chr10:25463756-25465639*Island	10	chr10:25463756-25465639	Island	LOC100128811	1.09351e-05	0.000282105	23	23	cg14971895	25465352	6.28146e-06	0.000601229	0.18856	0.225998	0.20309	-0.0145298	0.0281559	0.0213465	0.0229359	0
chr6:10887184-10887622*N_Shore	6	chr6:10887184-10887622	N_Shore	SYCP2L	1.09441e-05	0.000282105	8	8	cg23646360	10886130	8.62634e-05	0.00497075	0.34463	0.326704	0.286694	0.0579356	0.0546432	0.087522	0.0425855	0
chr1:201798213-201798698*N_Shore	1	chr1:201798213-201798698	N_Shore	IPO9	1.10282e-05	0.000284066	5	5	cg22677858	201797722	0.000205909	0.00976675	0.340486	0.393722	0.400683	-0.0601968	0.0367721	0.0575509	0.0333808	0
chr4:185939222-185942747*Island	4	chr4:185939222-185942747	Island	HELT	1.11098e-05	0.000285171	22	21	cg03997663	185940024	3.51161e-05	0.00244386	0.2404	0.22522	0.211741	0.0286585	0.027675	0.0599254	0.0214748	0
chr11:62341228-62341695*S_Shore	11	chr11:62341228-62341695	S_Shore	TUT1	1.11132e-05	0.000285171	5	5	cg14073716	62342730	2.867e-05	0.00207302	0.69241	0.658963	0.661049	0.0313617	0.0239454	0.0342059	0.0335886	0
chr11:62341228-62341695*S_Shore	11	chr11:62341228-62341695	S_Shore	EEF1G	1.11132e-05	0.000285171	5	5	cg14073716	62342730	2.867e-05	0.00207302	0.69241	0.658963	0.661049	0.0313617	0.0239454	0.0342059	0.0335886	0
chr10:372932-373159*S_Shelf	10	chr10:372932-373159	S_Shelf	DIP2C	1.11393e-05	0.000285717	3	3	cg06193766	375391	0.000161819	0.00808685	0.595002	0.706896	0.732493	-0.137491	0.08042	0.0686155	0.0617641	0
chr10:102289150-102289742*S_Shore	10	chr10:102289150-102289742	S_Shore	NDUFB8	1.1242e-05	0.000288182	4	4	cg17328514	102290094	1.64065e-06	0.000199517	0.71079	0.662011	0.686365	0.0244247	0.0309403	0.0451986	0.028563	0
chr3:152552602-152553712*S_Shore	3	chr3:152552602-152553712	S_Shore	P2RY1	1.12875e-05	0.00028918	4	4	cg14921522	152554055	5.04518e-07	7.51151e-05	0.620445	0.527536	0.527986	0.0924587	0.0542246	0.061156	0.044367	0
chr19:54466357-54466725*Island	19	chr19:54466357-54466725	Island	CACNG8	1.13024e-05	0.000289395	4	4	cg06116236	54466724	2.94114e-06	0.000321302	0.423932	0.388266	0.328246	0.0956863	0.0496871	0.0757563	0.0413515	0
chr6:3456061-3457963*N_Shore	6	chr6:3456061-3457963	N_Shore	SLC22A23	1.1322e-05	0.000289731	3	3	cg10091752	3455459	7.42399e-07	0.000102926	0.491708	0.378456	0.387978	0.10373	0.0513589	0.0584147	0.0441293	0
chr1:6208716-6209039*N_Shelf	1	chr1:6208716-6209039	N_Shelf	CHD5	1.13585e-05	0.000290278	3	3	cg11069824	6205325	1.80665e-06	0.000216125	0.619158	0.552557	0.557978	0.0611793	0.0286644	0.0460899	0.02481	0
chr17:7154424-7156126*N_Shore	17	chr17:7154424-7156126	N_Shore	DULLARD	1.13649e-05	0.000290278	4	4	cg00428598	7153814	1.00199e-06	0.000131762	0.736483	0.699073	0.679475	0.0570084	0.0534754	0.0681901	0.0558955	0
chr21:43186280-43187436*N_Shelf	21	chr21:43186280-43187436	N_Shelf	RIPK4	1.13856e-05	0.000290637	4	4	cg03079733	43183466	0.00514691	0.104366	0.297223	0.174089	0.182727	0.114496	0.0945232	0.0538463	0.0685474	0
chr2:237476311-237477263*S_Shore	2	chr2:237476311-237477263	S_Shore	CXCR7	1.14042e-05	0.000290859	6	6	cg03626672	237478664	6.39497e-06	0.000610557	0.740638	0.592758	0.645077	0.0955618	0.0571883	0.0876698	0.0617969	0
chr13:113424898-113425105*N_Shelf	13	chr13:113424898-113425105	N_Shelf	ATP11A	1.16686e-05	0.000297258	3	3	cg18972765	113422671	1.48127e-06	0.000183427	0.504792	0.623078	0.625224	-0.120432	0.0694733	0.0457423	0.0376491	0
chr11:7534554-7535727*S_Shore	11	chr11:7534554-7535727	S_Shore	PPFIBP2	1.17141e-05	0.000298287	3	3	cg10253640	7535983	1.25231e-05	0.00105291	0.559129	0.474876	0.509388	0.0497405	0.0510059	0.0786211	0.0489538	0
chr12:133135293-133135722*Island	12	chr12:133135293-133135722	Island	FBRSL1	1.17202e-05	0.000298313	3	3	cg06791426	133135361	4.16658e-06	0.000426611	0.203991	0.277548	0.272032	-0.0680404	0.0381741	0.0449094	0.028544	0
chr22:43045009-43045679*N_Shore	22	chr22:43045009-43045679	N_Shore	CYB5R3	1.1807e-05	0.000300306	5	5	cg04242898	43043131	0.000471643	0.0184522	0.650223	0.623856	0.635757	0.0144667	0.0241736	0.0499302	0.0275995	0
chr17:7284223-7284687*N_Shore	17	chr17:7284223-7284687	N_Shore	TNK1	1.1963e-05	0.000303878	3	3	cg18054943	7283897	7.5119e-07	0.000103981	0.437905	0.346811	0.379706	0.0581988	0.0399925	0.0580811	0.0430927	0
chr3:52008943-52009339*N_Shore	3	chr3:52008943-52009339	N_Shore	ABHD14B	1.19664e-05	0.000303878	8	8	cg10630880	52008682	7.74851e-07	0.000106503	0.175318	0.109338	0.125794	0.0495249	0.0377832	0.0352585	0.0259079	0
chr3:52008943-52009339*N_Shore	3	chr3:52008943-52009339	N_Shore	ABHD14A	1.19664e-05	0.000303878	8	8	cg10630880	52008682	7.74851e-07	0.000106503	0.175318	0.109338	0.125794	0.0495249	0.0377832	0.0352585	0.0259079	0
chr6:33282855-33283196*N_Shore	6	chr6:33282855-33283196	N_Shore	ZBTB22	1.20005e-05	0.000304088	16	15	cg25356697	33282736	1.45339e-05	0.00119063	0.250902	0.209989	0.209966	0.0409352	0.035385	0.0308553	0.0321613	0
chr6:33282855-33283196*N_Shore	6	chr6:33282855-33283196	N_Shore	TAPBP	1.20005e-05	0.000304088	16	15	cg25356697	33282736	1.45339e-05	0.00119063	0.250902	0.209989	0.209966	0.0409352	0.035385	0.0308553	0.0321613	0
chr2:74756223-74757930*N_Shelf	2	chr2:74756223-74757930	N_Shelf	DQX1	1.22235e-05	0.000309396	8	7	cg06721411	74753759	2.48177e-06	0.000277836	0.550856	0.507821	0.51022	0.0406359	0.0382554	0.0371062	0.0447565	0
chr21:14409412-14410501*Island	21	chr21:14409412-14410501	Island	C21orf99	1.22293e-05	0.000309396	5	4	cg01357003	14410329	3.83407e-06	0.000398352	0.60147	0.563348	0.554639	0.0468304	0.0246185	0.0335678	0.0245662	0
chr10:48438411-48439320*S_Shore	10	chr10:48438411-48439320	S_Shore	GDF10	1.24185e-05	0.000314046	3	3	cg14588178	48439430	1.60039e-06	0.00019543	0.625637	0.565585	0.58039	0.0452478	0.031852	0.0634889	0.0321943	0
chr6:28226979-28227483*N_Shore	6	chr6:28226979-28227483	N_Shore	NKAPL	1.2528e-05	0.000316634	4	4	cg21251018	28226885	4.62446e-06	0.000464319	0.556601	0.46764	0.472122	0.0844787	0.0560209	0.0890712	0.059896	0
chr1:233749373-233750314*Island	1	chr1:233749373-233750314	Island	KCNK1	1.25689e-05	0.000317212	10	10	cg11382055	233749410	2.97955e-06	0.000324292	0.158335	0.192701	0.162081	-0.00374663	0.0414732	0.038089	0.0262623	0
chr3:160472310-160474487*S_Shore	3	chr3:160472310-160474487	S_Shore	PPM1L	1.27267e-05	0.000321012	5	4	cg02470874	160475336	5.23036e-07	7.69963e-05	0.345112	0.290443	0.299943	0.0451685	0.0376423	0.0348656	0.0346306	0
chr2:108602824-108603467*Island	2	chr2:108602824-108603467	Island	SLC5A7	1.28706e-05	0.000324176	10	10	cg26001902	108602979	2.52728e-05	0.00186644	0.0608909	0.07696	0.0511545	0.00973635	0.047713	0.0344327	0.0331826	0
chr19:55889005-55889476*N_Shore	19	chr19:55889005-55889476	N_Shore	TMEM190	1.2883e-05	0.000324212	8	6	cg04800569	55888003	9.75006e-06	0.000860755	0.541559	0.448356	0.437433	0.104126	0.066888	0.052207	0.051509	0
chr14:77227569-77228691*S_Shore	14	chr14:77227569-77228691	S_Shore	VASH1	1.29508e-05	0.000325777	3	3	cg24996930	77229233	1.71731e-06	0.000206983	0.81413	0.778951	0.765122	0.0490083	0.0216086	0.0325625	0.0293501	0
chr7:29923882-29924264*Island	7	chr7:29923882-29924264	Island	WIPF3	1.29639e-05	0.000325967	3	3	cg08605301	29924135	2.29846e-05	0.00172788	0.410803	0.510736	0.491447	-0.0806437	0.050586	0.0726981	0.0432048	0
chr17:80376412-80376761*S_Shore	17	chr17:80376412-80376761	S_Shore	C17orf101	1.30018e-05	0.000326782	4	3	cg19179572	80377872	2.96936e-06	0.000323583	0.530188	0.4085	0.420221	0.109967	0.0544295	0.0507041	0.0518248	0
chr17:80376412-80376761*S_Shore	17	chr17:80376412-80376761	S_Shore	HEXDC	1.30018e-05	0.000326782	4	3	cg19179572	80377872	2.96936e-06	0.000323583	0.530188	0.4085	0.420221	0.109967	0.0544295	0.0507041	0.0518248	0
chr19:54974175-54976819*Island	19	chr19:54974175-54976819	Island	CDC42EP5	1.30284e-05	0.000326844	13	13	cg11456145	54976756	2.93232e-05	0.00210888	0.842369	0.821224	0.806326	0.0360431	0.0201457	0.0391058	0.0224231	0
chr21:46714984-46715206*Island	21	chr21:46714984-46715206	Island	LOC642852	1.30356e-05	0.000326885	3	3	cg07699312	46715205	0.00150709	0.044086	0.642287	0.676444	0.687654	-0.0453676	0.0351504	0.0477509	0.0463362	0
chr11:818974-820271*N_Shore	11	chr11:818974-820271	N_Shore	PNPLA2	1.31004e-05	0.000328182	7	7	cg20359360	818466	0.000147291	0.00749689	0.794568	0.765026	0.77651	0.0180575	0.0192731	0.032488	0.0239564	0
chr2:25142472-25143689*N_Shore	2	chr2:25142472-25143689	N_Shore	ADCY3	1.31409e-05	0.000328591	10	9	cg16888658	25142117	1.96338e-06	0.00023118	0.201915	0.283796	0.288944	-0.0870289	0.0398795	0.0564473	0.0369653	0
chr6:30923208-30923624*N_Shelf	6	chr6:30923208-30923624	N_Shelf	DPCR1	1.31646e-05	0.00032867	12	11	cg13871708	30921007	0.000113066	0.00612462	0.18185	0.150258	0.141256	0.0405946	0.0342991	0.0398031	0.0268328	0
chr2:10587827-10589155*N_Shore	2	chr2:10587827-10589155	N_Shore	ODC1	1.31739e-05	0.000328762	3	3	cg01381586	10587627	1.46359e-06	0.000181493	0.219807	0.118021	0.13807	0.0817374	0.0425479	0.0424644	0.0326678	0
chr2:10587827-10589155*N_Shore	2	chr2:10587827-10589155	N_Shore	SNORA80B	1.31739e-05	0.000328762	3	3	cg01381586	10587627	1.46359e-06	0.000181493	0.219807	0.118021	0.13807	0.0817374	0.0425479	0.0424644	0.0326678	0
chr2:27994470-27994944*N_Shore	2	chr2:27994470-27994944	N_Shore	MRPL33	1.32789e-05	0.000331149	5	5	cg05938007	27994018	2.60281e-06	0.000290098	0.491232	0.420051	0.434243	0.0569891	0.0365392	0.0440887	0.0310052	0
chr10:112257163-112258684*Island	10	chr10:112257163-112258684	Island	DUSP5	1.33713e-05	0.00033298	12	10	cg03652339	112258641	3.12531e-05	0.00221794	0.358099	0.418855	0.429671	-0.0715721	0.0393436	0.0529721	0.0254332	0
chr2:201728892-201729577*S_Shore	2	chr2:201728892-201729577	S_Shore	CLK1	1.34151e-05	0.000333883	4	4	cg18910534	201729768	1.7173e-05	0.00135942	0.506185	0.447156	0.437388	0.0687967	0.0468304	0.0781363	0.0342646	0
chr1:224621560-224622106*N_Shore	1	chr1:224621560-224622106	N_Shore	WDR26	1.35745e-05	0.000337659	4	4	cg18137450	224620806	2.98458e-06	0.00032464	0.528193	0.484102	0.492889	0.035304	0.0385688	0.0322831	0.0309755	0
chr11:70257279-70257556*N_Shore	11	chr11:70257279-70257556	N_Shore	CTTN	1.37364e-05	0.000341446	6	5	cg22720428	70256645	0.000145007	0.00740417	0.791233	0.840209	0.83086	-0.0396261	0.0252457	0.0231713	0.0285326	0
chr6:42109904-42110361*S_Shore	6	chr6:42109904-42110361	S_Shore	C6orf132	1.38389e-05	0.000343654	8	7	cg18486258	42110750	1.10846e-06	0.00014278	0.341759	0.273362	0.281519	0.0602395	0.0370986	0.0399944	0.0325387	0
chr11:64662462-64662880*Island	11	chr11:64662462-64662880	Island	ATG2A	1.39578e-05	0.000346348	3	3	cg06943835	64662577	1.06504e-06	0.000138197	0.690519	0.609301	0.652854	0.037665	0.0373812	0.0382399	0.0334205	0
chr3:46923265-46925182*Island	3	chr3:46923265-46925182	Island	PTH1R	1.39749e-05	0.000346348	11	11	cg11640591	46925181	7.84787e-07	0.000107534	0.200063	0.234875	0.226031	-0.0259673	0.0170213	0.0302107	0.0160857	0
chr5:178053432-178054411*N_Shore	5	chr5:178053432-178054411	N_Shore	CLK4	1.40853e-05	0.000348888	5	4	cg08812692	178052235	2.70612e-05	0.00197732	0.402246	0.329922	0.341166	0.06108	0.0571012	0.0498975	0.0439826	0
chr1:6202118-6202359*N_Shore	1	chr1:6202118-6202359	N_Shore	CHD5	1.43747e-05	0.000355906	3	3	cg21919596	6201851	1.00455e-06	0.000131806	0.104349	0.122029	0.132371	-0.0280224	0.0165247	0.0217001	0.0191039	0
chr11:64109822-64110228*N_Shelf	11	chr11:64109822-64110228	N_Shelf	CCDC88B	1.44854e-05	0.000358295	7	7	cg07884764	64107517	3.01241e-06	0.000326457	0.127312	0.189596	0.176377	-0.0490647	0.0223647	0.0358866	0.0348088	0
chr6:33281112-33281827*N_Shore	6	chr6:33281112-33281827	N_Shore	TAPBP	1.46247e-05	0.000360627	25	22	cg20998791	33280228	0.000799878	0.0277128	0.609771	0.543952	0.557082	0.0526884	0.0448775	0.0540703	0.0442216	0
chr15:99500472-99500721*Island	15	chr15:99500472-99500721	Island	IGF1R	1.48374e-05	0.000365247	3	3	cg05075416	99500703	9.21286e-07	0.000122799	0.686928	0.756626	0.765447	-0.0785194	0.0406712	0.0347801	0.0287639	0
chr22:22089624-22090909*Island	22	chr22:22089624-22090909	Island	YPEL1	1.4839e-05	0.000365247	11	10	cg08062118	22090796	0.00013152	0.00687691	0.232485	0.208417	0.187758	0.0447267	0.0463158	0.0775149	0.0410804	0
chr1:1141670-1142150*S_Shore	1	chr1:1141670-1142150	S_Shore	TNFRSF18	1.49011e-05	0.00036652	6	5	cg00086243	1142405	0.00161766	0.0463796	0.20034	0.226015	0.246911	-0.0465707	0.035854	0.0429821	0.0354488	0
chr8:38831592-38832353*Island	8	chr8:38831592-38832353	Island	HTRA4	1.49912e-05	0.000368477	6	5	cg16473915	38831702	1.07192e-05	0.000929551	0.229395	0.250603	0.263585	-0.0341897	0.0354696	0.0307392	0.038559	0
chr14:24801680-24802153*Island	14	chr14:24801680-24802153	Island	ADCY4	1.51655e-05	0.000372605	3	3	cg02098786	24801794	0.000584491	0.0218671	0.332674	0.257952	0.247451	0.0852232	0.0664404	0.0640767	0.0499074	0
chr19:852855-853495*N_Shore	19	chr19:852855-853495	N_Shore	ELANE	1.52315e-05	0.00037381	8	8	cg03633458	852284	1.25351e-05	0.00105332	0.343746	0.308976	0.331144	0.0126026	0.0527047	0.0427869	0.0545089	0
chr16:89006334-89008600*S_Shore	16	chr16:89006334-89008600	S_Shore	CBFA2T3	1.54496e-05	0.000378372	5	5	cg04540712	89009691	8.74553e-07	0.000117102	0.578775	0.652102	0.620267	-0.0414922	0.0492171	0.0336401	0.0419658	0
chr16:1429050-1430104*Island	16	chr16:1429050-1430104	Island	UNKL	1.54693e-05	0.00037854	8	6	cg00454305	1429905	1.96145e-06	0.00023118	0.414433	0.504368	0.481833	-0.0674005	0.0390424	0.059859	0.0277043	0
chr12:48399168-48399372*Island	12	chr12:48399168-48399372	Island	COL2A1	1.54983e-05	0.000379091	3	3	cg10502244	48399295	5.04714e-07	7.51151e-05	0.766356	0.705312	0.675649	0.0907073	0.0494546	0.0400467	0.0405696	0
chr17:40332597-40333471*N_Shore	17	chr17:40332597-40333471	N_Shore	KCNH4	1.55079e-05	0.000379167	3	3	cg06514003	40330907	4.89532e-07	7.35388e-05	0.508703	0.467942	0.4423	0.0664028	0.0461955	0.0681563	0.0410631	0
chr12:121148239-121148853*N_Shore	12	chr12:121148239-121148853	N_Shore	UNC119B	1.56737e-05	0.000382671	10	9	cg14380013	121146751	7.79494e-05	0.00459229	0.574001	0.656967	0.651943	-0.0779414	0.0442287	0.0420838	0.0391395	0
chr17:10632789-10633490*S_Shore	17	chr17:10632789-10633490	S_Shore	TMEM220	1.56772e-05	0.000382671	3	3	cg26234644	10634427	1.37764e-06	0.000171995	0.829362	0.719907	0.750384	0.0789788	0.0313293	0.0655448	0.051788	0
chr1:200378899-200379365*S_Shore	1	chr1:200378899-200379365	S_Shore	ZNF281	1.57731e-05	0.00038485	3	3	cg08272268	200380059	5.2126e-06	0.000514192	0.487882	0.541048	0.563887	-0.076005	0.0504028	0.0626081	0.0465174	0
chr17:72667195-72667710*Island	17	chr17:72667195-72667710	Island	RAB37	1.58782e-05	0.000387035	4	4	cg23832237	72667208	9.99921e-06	0.00087835	0.389584	0.314922	0.288949	0.100635	0.0581113	0.0686927	0.0500898	0
chr19:2050630-2051566*Island	19	chr19:2050630-2051566	Island	MKNK2	1.58868e-05	0.000387035	8	7	cg23899359	2051565	1.57342e-05	0.00127181	0.169869	0.136101	0.145625	0.0242447	0.0193491	0.0227588	0.0159521	0
chr8:122651665-122652389*N_Shore	8	chr8:122651665-122652389	N_Shore	HAS2	1.60666e-05	0.000390985	8	8	cg18047159	122651370	4.61247e-05	0.00300853	0.722937	0.671477	0.68692	0.0360167	0.0278676	0.0655216	0.0403018	0
chr8:122651665-122652389*N_Shore	8	chr8:122651665-122652389	N_Shore	HAS2AS	1.60666e-05	0.000390985	8	8	cg18047159	122651370	4.61247e-05	0.00300853	0.722937	0.671477	0.68692	0.0360167	0.0278676	0.0655216	0.0403018	0
chr11:117049399-117050234*Island	11	chr11:117049399-117050234	Island	SIDT2	1.61187e-05	0.000391765	10	9	cg00753089	117050233	3.01857e-06	0.000326723	0.1848	0.151045	0.151853	0.0329465	0.030429	0.0202068	0.0196472	0
chr17:8126224-8126486*S_Shore	17	chr17:8126224-8126486	S_Shore	C17orf44	1.6352e-05	0.000397085	4	3	cg06319579	8127196	3.9652e-05	0.00268117	0.308847	0.266408	0.284279	0.0245678	0.0331153	0.0378451	0.0267211	0
chr11:67250344-67250864*N_Shore	11	chr11:67250344-67250864	N_Shore	AIP	1.63534e-05	0.000397085	4	4	cg21747271	67250052	2.19623e-06	0.000250911	0.132382	0.0917591	0.10027	0.0321117	0.0297087	0.0198711	0.01954	0
chr11:62455073-62455868*S_Shore	11	chr11:62455073-62455868	S_Shore	LRRN4CL	1.63982e-05	0.000397459	8	8	cg15538427	62457014	7.38061e-07	0.000102442	0.509147	0.45546	0.477889	0.0312578	0.0252891	0.0278974	0.0292698	0
chr14:105992499-105996414*Island	14	chr14:105992499-105996414	Island	TMEM121	1.64162e-05	0.000397459	13	13	cg15178202	105995393	3.57581e-06	0.000374835	0.298552	0.229386	0.207184	0.0913677	0.041779	0.0683274	0.0572761	0
chr18:499315-500722*S_Shore	18	chr18:499315-500722	S_Shore	COLEC12	1.66204e-05	0.000402073	6	6	cg21067023	501513	7.57886e-07	0.000104826	0.515442	0.657143	0.651455	-0.136013	0.0493625	0.0831793	0.0633004	0
chr19:46144872-46145631*N_Shore	19	chr19:46144872-46145631	N_Shore	MIR330	1.66643e-05	0.00040281	3	3	cg18515250	46142930	2.13182e-06	0.000245683	0.375992	0.333018	0.338774	0.0372181	0.0322963	0.0418258	0.0351914	0
chr19:46144872-46145631*N_Shore	19	chr19:46144872-46145631	N_Shore	EML2	1.66643e-05	0.00040281	3	3	cg18515250	46142930	2.13182e-06	0.000245683	0.375992	0.333018	0.338774	0.0372181	0.0322963	0.0418258	0.0351914	0
chr19:7701661-7702336*Island	19	chr19:7701661-7702336	Island	STXBP2	1.66806e-05	0.00040281	10	10	cg04770751	7701662	7.94011e-06	0.000727958	0.400547	0.341048	0.346942	0.053605	0.0370675	0.0541494	0.0304881	0
chr19:40971476-40973393*Island	19	chr19:40971476-40973393	Island	BLVRB	1.69077e-05	0.000407456	15	15	cg19653594	40972323	7.60981e-07	0.000105089	0.33869	0.243892	0.252626	0.0860649	0.0704704	0.0596309	0.0373898	0
chr19:40971476-40973393*Island	19	chr19:40971476-40973393	Island	SPTBN4	1.69077e-05	0.000407456	15	15	cg19653594	40972323	7.60981e-07	0.000105089	0.33869	0.243892	0.252626	0.0860649	0.0704704	0.0596309	0.0373898	0
chr8:79716681-79717403*S_Shore	8	chr8:79716681-79717403	S_Shore	IL7	1.69547e-05	0.000408255	6	6	cg05490029	79719015	6.33401e-07	9.04476e-05	0.460807	0.489209	0.569707	-0.108899	0.0492539	0.0658321	0.0472554	0
chr2:75060879-75062664*Island	2	chr2:75060879-75062664	Island	HK2	1.70013e-05	0.000408873	9	9	cg23157190	75060880	1.37522e-05	0.00113556	0.449193	0.39748	0.403916	0.0452775	0.0322744	0.0329546	0.0198295	0
chr2:157184389-157184632*N_Shore	2	chr2:157184389-157184632	N_Shore	NR4A2	1.71308e-05	0.000411706	5	5	cg10089963	157182707	2.07008e-06	0.000240614	0.347037	0.431344	0.430078	-0.0830402	0.0565989	0.0651748	0.06049	0
chr1:207925171-207925964*N_Shore	1	chr1:207925171-207925964	N_Shore	CD46	1.72596e-05	0.000414577	4	4	cg04290171	207924482	6.25456e-06	0.000599305	0.868519	0.791779	0.809284	0.059235	0.0212491	0.052901	0.0377228	0
chr17:46620367-46621373*S_Shore	17	chr17:46620367-46621373	S_Shore	HOXB2	1.75426e-05	0.000420686	12	12	cg26841048	46622454	1.06206e-05	0.000922812	0.499547	0.442819	0.46947	0.0300772	0.0452453	0.0499755	0.0463986	0
chr20:3732061-3732944*S_Shore	20	chr20:3732061-3732944	S_Shore	HSPA12B	1.75675e-05	0.000421012	3	3	cg16774160	3733476	9.04942e-06	0.000810268	0.737235	0.703198	0.705477	0.0317581	0.0353081	0.0371487	0.0237139	0
chr10:121577529-121578385*Island	10	chr10:121577529-121578385	Island	INPP5F	1.7577e-05	0.000421012	4	4	cg02722214	121578137	4.14088e-06	0.000424473	0.771678	0.739418	0.716598	0.0550806	0.035875	0.0458354	0.0288484	0
chr17:20945386-20945633*S_Shore	17	chr17:20945386-20945633	S_Shore	USP22	1.75801e-05	0.000421012	3	3	cg22748407	20947311	7.44146e-07	0.000103087	0.382601	0.350178	0.351716	0.0308855	0.0306514	0.0299322	0.0268436	0
chr19:11493484-11494363*S_Shore	19	chr19:11493484-11494363	S_Shore	EPOR	1.76462e-05	0.000422307	5	5	cg24477567	11495295	5.35777e-06	0.000525312	0.557751	0.523641	0.5142	0.0435508	0.0328888	0.0480388	0.0190031	0
chr16:88975850-88976169*N_Shelf	16	chr16:88975850-88976169	N_Shelf	CBFA2T3	1.77303e-05	0.000424032	5	5	cg04513311	88972865	7.09044e-05	0.00424537	0.626704	0.698002	0.702019	-0.0753147	0.0406381	0.0384737	0.0357293	0
chr17:7123038-7123718*S_Shore	17	chr17:7123038-7123718	S_Shore	ACADVL	1.77507e-05	0.00042429	4	4	cg03508063	7124385	1.29907e-06	0.000163976	0.494533	0.419737	0.450767	0.0437661	0.0383749	0.0447418	0.0223147	0
chr17:7123038-7123718*S_Shore	17	chr17:7123038-7123718	S_Shore	DLG4	1.77507e-05	0.00042429	4	4	cg03508063	7124385	1.29907e-06	0.000163976	0.494533	0.419737	0.450767	0.0437661	0.0383749	0.0447418	0.0223147	0
chr4:130014349-130014899*S_Shore	4	chr4:130014349-130014899	S_Shore	C4orf33	1.7775e-05	0.000424641	4	4	cg05812836	130015087	1.62177e-05	0.00130312	0.132371	0.0974229	0.0999107	0.0324607	0.017482	0.0189266	0.0164207	0
chr4:130014349-130014899*S_Shore	4	chr4:130014349-130014899	S_Shore	SCLT1	1.7775e-05	0.000424641	4	4	cg05812836	130015087	1.62177e-05	0.00130312	0.132371	0.0974229	0.0999107	0.0324607	0.017482	0.0189266	0.0164207	0
chr14:100259160-100259542*N_Shore	14	chr14:100259160-100259542	N_Shore	EML1	1.78667e-05	0.000426659	3	3	cg02727423	100258973	2.19142e-06	0.000250749	0.430398	0.389916	0.389041	0.0413568	0.0313967	0.0350634	0.0254195	0
chr19:8273530-8273920*Island	19	chr19:8273530-8273920	Island	LASS4	1.78956e-05	0.00042706	5	5	cg24413781	8273693	6.73486e-06	0.00063429	0.336202	0.262985	0.270789	0.0654125	0.052292	0.0766298	0.0598562	0
chr1:149857769-149859470*S_Shore	1	chr1:149857769-149859470	S_Shore	HIST2H2AB	1.833e-05	0.000436971	6	6	cg05950212	149860711	4.84653e-06	0.000482765	0.595438	0.539485	0.53586	0.0595778	0.0478848	0.0601577	0.0413612	0
chr3:44283239-44283838*N_Shore	3	chr3:44283239-44283838	N_Shore	C3orf77	1.83423e-05	0.000436971	4	4	cg03310007	44281926	6.63503e-05	0.00403997	0.727677	0.769953	0.78406	-0.0563839	0.0343734	0.0426256	0.0241477	0
chr16:711065-711414*N_Shore	16	chr16:711065-711414	N_Shore	WDR90	1.83506e-05	0.000436971	6	6	cg02852791	710674	2.03914e-06	0.000237645	0.52216	0.437921	0.423364	0.0987955	0.0550888	0.0759234	0.0699627	0
chr14:89017660-89017972*N_Shore	14	chr14:89017660-89017972	N_Shore	PTPN21	1.83821e-05	0.000437484	4	4	cg20265748	89017615	6.60441e-06	0.000626632	0.766837	0.727377	0.734045	0.0327917	0.0332798	0.0587208	0.0318933	0
chr16:12070257-12070870*S_Shore	16	chr16:12070257-12070870	S_Shore	RUNDC2A	1.8442e-05	0.000438732	3	3	cg03082108	12071430	0.00102846	0.0333382	0.205654	0.187375	0.188403	0.0172514	0.0226669	0.0173983	0.0209569	0
chr3:12598391-12599051*N_Shore	3	chr3:12598391-12599051	N_Shore	MKRN2	1.85528e-05	0.000441189	3	3	cg00099295	12597720	9.91517e-07	0.000130776	0.499015	0.404225	0.357742	0.141273	0.102717	0.120809	0.0919225	0
chr2:69664291-69664816*S_Shore	2	chr2:69664291-69664816	S_Shore	NFU1	1.86304e-05	0.000442795	4	4	cg11644052	69665132	2.44738e-06	0.000275387	0.615313	0.527406	0.558182	0.0571306	0.0380118	0.0451771	0.0357857	0
chr18:30349690-30352302*Island	18	chr18:30349690-30352302	Island	KLHL14	1.86675e-05	0.000443078	10	10	cg04209727	30350441	4.45829e-05	0.00292916	0.0767452	0.0833869	0.0782745	-0.00152927	0.0183662	0.0138156	0.0187018	0
chr16:1480844-1481045*N_Shore	16	chr16:1480844-1481045	N_Shore	C16orf91	1.88225e-05	0.000446141	8	7	cg01713348	1480790	1.61668e-06	0.000197011	0.70436	0.740192	0.754357	-0.0499972	0.0331386	0.0702861	0.0330294	0
chr8:21914275-21914525*S_Shore	8	chr8:21914275-21914525	S_Shore	EPB49	1.88269e-05	0.000446141	6	5	cg17560136	21915510	2.25847e-05	0.00170144	0.718797	0.651627	0.685862	0.0329345	0.034827	0.0598851	0.038886	0
chr3:194392808-194393378*S_Shore	3	chr3:194392808-194393378	S_Shore	LSG1	1.88499e-05	0.000446507	3	3	cg00181432	194393818	8.78076e-07	0.000117484	0.409763	0.336548	0.356476	0.0532865	0.0436611	0.0408378	0.0513845	0
chr19:10397603-10398703*N_Shore	19	chr19:10397603-10398703	N_Shore	ICAM1	1.88858e-05	0.000447115	4	4	cg00500176	10396158	0.000229989	0.0106846	0.464029	0.412553	0.44168	0.0223496	0.0411988	0.0526834	0.0531882	0
chr19:10397603-10398703*N_Shore	19	chr19:10397603-10398703	N_Shore	ICAM4	1.88858e-05	0.000447115	4	4	cg00500176	10396158	0.000229989	0.0106846	0.464029	0.412553	0.44168	0.0223496	0.0411988	0.0526834	0.0531882	0
chr19:11307495-11308276*S_Shore	19	chr19:11307495-11308276	S_Shore	KANK2	1.90382e-05	0.000450302	7	7	cg01751802	11309639	1.95119e-05	0.00151518	0.651517	0.570131	0.578472	0.0730455	0.0576904	0.0588818	0.0433593	0
chr14:23355738-23356402*N_Shelf	14	chr14:23355738-23356402	N_Shelf	REM2	1.91953e-05	0.000453713	5	5	cg00609473	23351842	1.06074e-05	0.000922573	0.150024	0.168151	0.173892	-0.0238684	0.0305512	0.0232301	0.0289677	0
chr1:22149683-22149897*S_Shore	1	chr1:22149683-22149897	S_Shore	LDLRAD2	1.92153e-05	0.000453942	4	4	cg24254377	22149967	3.24455e-05	0.00228507	0.949304	0.898664	0.898896	0.0504072	0.0231376	0.0435624	0.0408469	0
chr1:22149683-22149897*S_Shore	1	chr1:22149683-22149897	S_Shore	HSPG2	1.92153e-05	0.000453942	4	4	cg24254377	22149967	3.24455e-05	0.00228507	0.949304	0.898664	0.898896	0.0504072	0.0231376	0.0435624	0.0408469	0
chr3:46607346-46607806*S_Shore	3	chr3:46607346-46607806	S_Shore	LRRC2	1.94042e-05	0.000457912	8	8	cg11136751	46608069	4.59824e-06	0.000461999	0.23865	0.208198	0.210042	0.0286073	0.0327982	0.0417397	0.0377324	0
chr17:74070404-74073530*N_Shore	17	chr17:74070404-74073530	N_Shore	GALR2	1.96911e-05	0.000464247	8	7	cg12352315	74069707	0.000234494	0.0108367	0.853342	0.828256	0.815971	0.0373709	0.0233701	0.0444808	0.0342817	0
chr17:74070404-74073530*N_Shore	17	chr17:74070404-74073530	N_Shore	SRP68	1.96911e-05	0.000464247	8	7	cg12352315	74069707	0.000234494	0.0108367	0.853342	0.828256	0.815971	0.0373709	0.0233701	0.0444808	0.0342817	0
chr7:5534384-5534766*S_Shore	7	chr7:5534384-5534766	S_Shore	MIR589	1.97242e-05	0.000464336	12	11	cg09286367	5535692	2.00858e-05	0.00154691	0.843601	0.865436	0.895147	-0.0515459	0.0310503	0.051881	0.0214448	0
chr7:5534384-5534766*S_Shore	7	chr7:5534384-5534766	S_Shore	FBXL18	1.97242e-05	0.000464336	12	11	cg09286367	5535692	2.00858e-05	0.00154691	0.843601	0.865436	0.895147	-0.0515459	0.0310503	0.051881	0.0214448	0
chr13:113241711-113241925*S_Shore	13	chr13:113241711-113241925	S_Shore	TUBGCP3	1.97344e-05	0.000464336	5	4	cg19916129	113242878	1.0255e-06	0.000134153	0.680578	0.553106	0.532248	0.148329	0.0651811	0.113563	0.0742106	0
chr7:55433147-55434271*N_Shore	7	chr7:55433147-55434271	N_Shore	LANCL2	1.97559e-05	0.000464656	4	3	cg05979484	55432630	6.53252e-07	9.29808e-05	0.264972	0.181407	0.204003	0.0609688	0.0473104	0.0483341	0.0397262	0
chr12:13152819-13153084*N_Shore	12	chr12:13152819-13153084	N_Shore	HEBP1	1.98097e-05	0.000465732	3	3	cg13883576	13152467	5.10385e-05	0.00326919	0.879056	0.854042	0.849338	0.0297174	0.018276	0.0253235	0.026358	0
chr12:13152819-13153084*N_Shore	12	chr12:13152819-13153084	N_Shore	HTR7P	1.98097e-05	0.000465732	3	3	cg13883576	13152467	5.10385e-05	0.00326919	0.879056	0.854042	0.849338	0.0297174	0.018276	0.0253235	0.026358	0
chr1:53558388-53558642*Island	1	chr1:53558388-53558642	Island	SLC1A7	1.98201e-05	0.000465732	4	4	cg14212966	53558392	3.87228e-06	0.000401376	0.545978	0.580323	0.599435	-0.053457	0.0363842	0.065534	0.0314888	0
chr9:139872237-139873143*Island	9	chr9:139872237-139873143	Island	PTGDS	1.99056e-05	0.000467491	4	4	cg13796381	139872395	7.86522e-07	0.000107688	0.482076	0.395207	0.396763	0.085313	0.0552535	0.0605591	0.0428433	0
chr11:6439863-6440732*S_Shore	11	chr11:6439863-6440732	S_Shore	APBB1	2.01466e-05	0.000472836	6	5	cg06805557	6440931	1.84194e-06	0.000219572	0.22264	0.163497	0.162917	0.0597227	0.034836	0.0468424	0.0215754	0
chr12:57631932-57634578*N_Shore	12	chr12:57631932-57634578	N_Shore	NDUFA4L2	2.01804e-05	0.000473441	3	3	cg19062108	57630834	1.52334e-06	0.00018745	0.136574	0.186995	0.171454	-0.0348795	0.0159634	0.0236658	0.0185269	0
chr17:17380175-17380416*N_Shore	17	chr17:17380175-17380416	N_Shore	MED9	2.03239e-05	0.000476447	3	3	cg20850602	17379752	1.13581e-06	0.000145452	0.104659	0.134992	0.132307	-0.027648	0.0140796	0.0286192	0.0177458	0
chr12:53625629-53625993*S_Shore	12	chr12:53625629-53625993	S_Shore	RARG	2.03248e-05	0.000476447	3	3	cg17436656	53627106	7.28565e-07	0.000101407	0.590008	0.474308	0.529742	0.0602659	0.0471922	0.069072	0.0374553	0
chr1:228603706-228604567*Island	1	chr1:228603706-228604567	Island	TRIM17	2.03882e-05	0.000477552	6	6	cg26896787	228603707	2.62684e-05	0.00193188	0.277475	0.259768	0.247244	0.0302315	0.0224155	0.0346335	0.0158951	0
chr3:183145427-183146790*Island	3	chr3:183145427-183146790	Island	MCF2L2	2.04609e-05	0.000478491	12	12	cg21200353	183145532	1.84627e-06	0.000219796	0.0908575	0.10639	0.107852	-0.0169946	0.0365723	0.024919	0.0306425	0
chr3:9956822-9957664*S_Shore	3	chr3:9956822-9957664	S_Shore	IL17RC	2.06704e-05	0.000483198	4	3	cg07705835	9959128	3.14529e-05	0.00222686	0.479968	0.440999	0.473668	0.00630014	0.0291415	0.0414385	0.0263966	0
chr22:32870550-32871364*N_Shore	22	chr22:32870550-32871364	N_Shore	FBXO7	2.08141e-05	0.000486299	4	4	cg21023126	32870150	8.32211e-07	0.00011263	0.438413	0.372376	0.38948	0.0489338	0.0596718	0.0695418	0.0567651	0
chr1:24126799-24127549*N_Shore	1	chr1:24126799-24127549	N_Shore	GALE	2.084e-05	0.000486454	7	7	cg00988350	24126048	1.97837e-05	0.001529	0.37401	0.419082	0.425319	-0.0513086	0.0298938	0.0488834	0.0270264	0
chr12:72233323-72233635*N_Shore	12	chr12:72233323-72233635	N_Shore	TBC1D15	2.08975e-05	0.000487538	4	4	cg04831505	72233240	1.0874e-06	0.000140375	0.232921	0.192274	0.173037	0.0598839	0.0524784	0.053375	0.0397143	0
chr7:5526389-5526693*N_Shore	7	chr7:5526389-5526693	N_Shore	FBXL18	2.1101e-05	0.00049209	3	3	cg08394896	5525075	3.60306e-06	0.000377242	0.653942	0.559178	0.584111	0.0698306	0.0524878	0.0659063	0.0629376	0
chr1:29240768-29241969*N_Shore	1	chr1:29240768-29241969	N_Shore	EPB41	2.13176e-05	0.000496812	5	5	cg08139234	29240631	0.000537992	0.0204885	0.106424	0.0732059	0.0890336	0.0173907	0.0273134	0.023264	0.0219118	0
chr17:34058549-34058778*N_Shore	17	chr17:34058549-34058778	N_Shore	RASL10B	2.14747e-05	0.000500274	3	3	cg02980604	34058433	7.0754e-07	9.91068e-05	0.622961	0.585485	0.603753	0.0192082	0.0275058	0.0308713	0.0278534	0
chr14:103568365-103571499*N_Shelf	14	chr14:103568365-103571499	N_Shelf	C14orf73	2.15963e-05	0.000502841	4	4	cg10422233	103565915	1.57733e-05	0.00127438	0.781057	0.757224	0.761969	0.0190877	0.0159026	0.0240113	0.0173478	0
chr19:4909262-4910256*N_Shore	19	chr19:4909262-4910256	N_Shore	UHRF1	2.16707e-05	0.000504375	3	3	cg14993439	4909175	3.94372e-05	0.00267177	0.566809	0.529407	0.526461	0.0403476	0.0222293	0.0316694	0.0239331	0
chr1:117112960-117113883*N_Shore	1	chr1:117112960-117113883	N_Shore	CD58	2.1728e-05	0.000505507	4	3	cg09584521	117112727	0.00364688	0.0820677	0.0783466	0.0643074	0.0756546	0.00269208	0.01737	0.0146161	0.0145814	0
chr11:2828445-2828884*N_Shore	11	chr11:2828445-2828884	N_Shore	KCNQ1	2.19389e-05	0.000509197	6	6	cg16609872	2828364	1.06666e-05	0.000925439	0.728441	0.688571	0.69783	0.0306109	0.0394742	0.0395271	0.029758	0
chr1:155034925-155036578*Island	1	chr1:155034925-155036578	Island	EFNA4	2.19415e-05	0.000509197	16	13	cg18832152	155035183	1.19479e-06	0.000151792	0.150747	0.117876	0.124301	0.0264454	0.0224091	0.0199198	0.0210831	0
chr1:155034925-155036578*Island	1	chr1:155034925-155036578	Island	ADAM15	2.19415e-05	0.000509197	16	13	cg18832152	155035183	1.19479e-06	0.000151792	0.150747	0.117876	0.124301	0.0264454	0.0224091	0.0199198	0.0210831	0
chr1:2116432-2116801*Island	1	chr1:2116432-2116801	Island	PRKCZ	2.20293e-05	0.000511032	3	3	cg10057528	2116747	1.27835e-06	0.000161592	0.932073	0.96642	0.967644	-0.035571	0.0203892	0.0124811	0.012202	0
chr1:2116432-2116801*Island	1	chr1:2116432-2116801	Island	C1orf86	2.20293e-05	0.000511032	3	3	cg10057528	2116747	1.27835e-06	0.000161592	0.932073	0.96642	0.967644	-0.035571	0.0203892	0.0124811	0.012202	0
chr22:26879458-26879930*S_Shore	22	chr22:26879458-26879930	S_Shore	HPS4	2.21211e-05	0.000512959	3	3	cg07924575	26881231	2.84543e-06	0.000312981	0.497683	0.474875	0.48623	0.0114529	0.0457418	0.0408417	0.0442681	0
chr22:26879458-26879930*S_Shore	22	chr22:26879458-26879930	S_Shore	SRRD	2.21211e-05	0.000512959	3	3	cg07924575	26881231	2.84543e-06	0.000312981	0.497683	0.474875	0.48623	0.0114529	0.0457418	0.0408417	0.0442681	0
chr20:33680438-33681029*Island	20	chr20:33680438-33681029	Island	TRPC4AP	2.21999e-05	0.00051402	10	9	cg11277126	33680945	1.86778e-05	0.00145953	0.426198	0.39951	0.39841	0.027788	0.0327267	0.0323165	0.0276183	0
chr5:60139359-60140155*N_Shore	5	chr5:60139359-60140155	N_Shore	ELOVL7	2.22106e-05	0.00051402	6	6	cg15134801	60138838	1.65243e-05	0.00132112	0.48314	0.576426	0.585138	-0.101998	0.0386597	0.0626381	0.0620428	0
chr20:20032740-20033471*S_Shelf	20	chr20:20032740-20033471	S_Shelf	CRNKL1	2.23493e-05	0.000516652	6	6	cg16691087	20036684	3.2428e-06	0.000346484	0.465162	0.554954	0.581096	-0.115934	0.0669248	0.0692305	0.071287	0
chr20:20032740-20033471*S_Shelf	20	chr20:20032740-20033471	S_Shelf	C20orf26	2.23493e-05	0.000516652	6	6	cg16691087	20036684	3.2428e-06	0.000346484	0.465162	0.554954	0.581096	-0.115934	0.0669248	0.0692305	0.071287	0
chr17:73149830-73150885*S_Shore	17	chr17:73149830-73150885	S_Shore	HN1	2.23536e-05	0.000516652	4	4	cg11732306	73151124	3.01009e-05	0.00215352	0.623617	0.560291	0.573389	0.050228	0.0432838	0.0843179	0.0389212	0
chr14:51706791-51707499*N_Shore	14	chr14:51706791-51707499	N_Shore	TMX1	2.23802e-05	0.000517063	3	3	cg14836018	51706425	1.17414e-05	0.000998536	0.515302	0.440411	0.46487	0.0504323	0.0309074	0.0506071	0.0441579	0
chr17:43209347-43210746*S_Shelf	17	chr17:43209347-43210746	S_Shelf	ACBD4	2.25226e-05	0.000519535	13	12	cg27401724	43213629	4.5087e-06	0.00045477	0.628793	0.534162	0.577204	0.0515884	0.0302092	0.0473622	0.0358915	0
chr1:145415411-145415708*S_Shore	1	chr1:145415411-145415708	S_Shore	HFE2	2.25885e-05	0.000520851	3	3	cg08847140	145416777	1.50248e-06	0.000185662	0.361106	0.325133	0.317357	0.0437492	0.0313817	0.0402985	0.03486	0
chr12:12939713-12940391*N_Shore	12	chr12:12939713-12940391	N_Shore	APOLD1	2.28094e-05	0.000525259	7	7	cg02301528	12939519	1.45576e-06	0.000181001	0.520811	0.429856	0.467795	0.0530153	0.0395944	0.0317794	0.0283252	0
chr7:4303079-4305062*S_Shelf	7	chr7:4303079-4305062	S_Shelf	SDK1	2.28605e-05	0.000525259	9	9	cg21853331	4308120	3.45511e-06	0.000365663	0.471612	0.406447	0.431143	0.0404685	0.0416721	0.0471687	0.0380025	0
chr15:91473314-91473592*N_Shore	15	chr15:91473314-91473592	N_Shore	UNC45A	2.28728e-05	0.000525259	4	4	cg08939371	91473059	2.75877e-06	0.00030459	0.143776	0.0482615	0.0661037	0.0776724	0.0557382	0.0214338	0.0260946	0
chr22:50912550-50913857*Island	22	chr22:50912550-50913857	Island	SBF1	2.28767e-05	0.000525259	8	8	cg15376996	50912555	2.18717e-06	0.000250425	0.575995	0.494691	0.508053	0.0679414	0.0409746	0.0583136	0.0426103	0
chr3:30647987-30648881*N_Shore	3	chr3:30647987-30648881	N_Shore	TGFBR2	2.2893e-05	0.000525259	11	10	cg26376346	30647378	5.83066e-05	0.00362634	0.786371	0.750594	0.745406	0.0409645	0.0226515	0.0369499	0.0286037	0
chr1:92545819-92546480*N_Shore	1	chr1:92545819-92546480	N_Shore	BTBD8	2.29903e-05	0.000527081	6	6	cg26580095	92545650	0.000142347	0.00732994	0.434278	0.434087	0.459052	-0.0247743	0.022002	0.0442666	0.0226262	0
chr3:49058325-49059986*N_Shore	3	chr3:49058325-49059986	N_Shore	DALRD3	2.32762e-05	0.000532836	12	10	cg21379639	49056420	1.78396e-06	0.0002137	0.263852	0.22844	0.22664	0.0372118	0.0348035	0.0329026	0.0290414	0
chr3:49058325-49059986*N_Shore	3	chr3:49058325-49059986	N_Shore	NDUFAF3	2.32762e-05	0.000532836	12	10	cg21379639	49056420	1.78396e-06	0.0002137	0.263852	0.22844	0.22664	0.0372118	0.0348035	0.0329026	0.0290414	0
chr1:100731632-100731999*N_Shore	1	chr1:100731632-100731999	N_Shore	RTCD1	2.32927e-05	0.000532836	7	7	cg14832954	100731266	4.00899e-06	0.0004136	0.215017	0.137304	0.143544	0.071473	0.0403006	0.0314629	0.0347769	0
chr16:58033947-58035548*N_Shore	16	chr16:58033947-58035548	N_Shore	ZNF319	2.33293e-05	0.000533396	4	4	cg06866605	58031974	1.98452e-06	0.000232355	0.716769	0.782909	0.783574	-0.0668048	0.0318877	0.0314296	0.0286276	0
chr7:105650026-105650233*S_Shore	7	chr7:105650026-105650233	S_Shore	FLJ23834	2.33575e-05	0.000533832	3	3	cg19344322	105650550	0.00136443	0.0410496	0.67151	0.634809	0.646352	0.0251575	0.0368651	0.04253	0.0426076	0
chr17:37356486-37356945*N_Shore	17	chr17:37356486-37356945	N_Shore	RPL19	2.35221e-05	0.000537036	8	8	cg01297101	37356023	3.14098e-05	0.00222547	0.145629	0.106097	0.112844	0.0327849	0.0222383	0.0209727	0.017014	0
chr1:155178547-155178980*N_Shore	1	chr1:155178547-155178980	N_Shore	MTX1	2.35719e-05	0.000537546	9	9	cg02516288	155177783	2.20645e-05	0.00167082	0.372292	0.274455	0.301385	0.0709065	0.0586326	0.0520021	0.0488468	0
chr1:155178547-155178980*N_Shore	1	chr1:155178547-155178980	N_Shore	THBS3	2.35719e-05	0.000537546	9	9	cg02516288	155177783	2.20645e-05	0.00167082	0.372292	0.274455	0.301385	0.0709065	0.0586326	0.0520021	0.0488468	0
chr17:74099738-74100055*S_Shore	17	chr17:74099738-74100055	S_Shore	EXOC7	2.36832e-05	0.000539875	3	3	cg08122232	74100132	0.000275771	0.0122867	0.377414	0.467662	0.475353	-0.0979393	0.0723628	0.0639345	0.0643947	0
chr21:37442140-37442778*Island	21	chr21:37442140-37442778	Island	CBR1	2.38104e-05	0.000542425	5	5	cg03841977	37442777	0.00784979	0.139003	0.200821	0.133981	0.134203	0.0666179	0.0670108	0.0801368	0.0505278	0
chr12:104697348-104697984*Island	12	chr12:104697348-104697984	Island	EID3	2.4152e-05	0.000549496	10	10	cg01848457	104697983	3.30079e-06	0.000351229	0.438149	0.333886	0.32751	0.110639	0.0618826	0.0852824	0.0579112	0
chr12:104697348-104697984*Island	12	chr12:104697348-104697984	Island	TXNRD1	2.4152e-05	0.000549496	10	10	cg01848457	104697983	3.30079e-06	0.000351229	0.438149	0.333886	0.32751	0.110639	0.0618826	0.0852824	0.0579112	0
chr2:107502353-107504216*N_Shore	2	chr2:107502353-107504216	N_Shore	ST6GAL2	2.41994e-05	0.000550361	4	3	cg19825856	107501733	9.17502e-06	0.000819432	0.118419	0.0753074	0.0875196	0.0308991	0.0265294	0.0156437	0.0186393	0
chr2:219738081-219738788*Island	2	chr2:219738081-219738788	Island	WNT6	2.43102e-05	0.000552596	5	4	cg13903421	219738714	2.00133e-06	0.000234167	0.528915	0.444756	0.391618	0.137297	0.0737418	0.0752906	0.0665679	0
chr12:53297442-53297824*S_Shore	12	chr12:53297442-53297824	S_Shore	KRT8	2.45985e-05	0.000558502	10	9	cg21340733	53298888	8.56661e-07	0.000115143	0.724879	0.834251	0.833416	-0.108537	0.0670082	0.0300532	0.0202293	0
chr19:45504865-45505299*N_Shore	19	chr19:45504865-45505299	N_Shore	RELB	2.4699e-05	0.000560494	4	4	cg02727285	45504242	5.1981e-06	0.000513497	0.313731	0.276695	0.262455	0.0512762	0.0335585	0.0419321	0.0286392	0
chr3:124303529-124304092*N_Shore	3	chr3:124303529-124304092	N_Shore	KALRN	2.47385e-05	0.000561102	4	4	cg04516112	124303404	1.29294e-06	0.000163319	0.330588	0.363865	0.372122	-0.0415336	0.0234434	0.029957	0.0172696	0
chr1:3310102-3311035*N_Shore	1	chr1:3310102-3311035	N_Shore	PRDM16	2.4789e-05	0.000561956	4	4	cg20671649	3309864	1.6931e-06	0.000204905	0.344974	0.280144	0.286587	0.0583868	0.0349326	0.0316933	0.0252558	0
chr3:52739537-52740426*N_Shore	3	chr3:52739537-52740426	N_Shore	SPCS1	2.48306e-05	0.000562467	6	6	cg02499768	52739037	4.71344e-06	0.000472323	0.215211	0.149349	0.169204	0.0460069	0.0389744	0.0528229	0.0275821	0
chr3:52739537-52740426*N_Shore	3	chr3:52739537-52740426	N_Shore	GLT8D1	2.48306e-05	0.000562467	6	6	cg02499768	52739037	4.71344e-06	0.000472323	0.215211	0.149349	0.169204	0.0460069	0.0389744	0.0528229	0.0275821	0
chr9:139888934-139890343*S_Shore	9	chr9:139888934-139890343	S_Shore	CLIC3	2.48431e-05	0.000562533	3	3	cg21196488	139890918	0.0011561	0.0364627	0.142398	0.135401	0.128672	0.0137262	0.0141575	0.0147243	0.014278	0
chr1:27286065-27287101*S_Shore	1	chr1:27286065-27287101	S_Shore	C1orf172	2.48752e-05	0.000562898	5	5	cg16574155	27287468	3.46722e-06	0.000366724	0.801836	0.77886	0.765554	0.0362818	0.0307371	0.0343682	0.0306984	0
chr7:30517987-30518610*S_Shore	7	chr7:30517987-30518610	S_Shore	NOD1	2.48946e-05	0.00056312	3	3	cg26956245	30518972	1.58151e-06	0.000193393	0.115918	0.058786	0.0789532	0.0369643	0.0292054	0.0199293	0.0262914	0
chr12:124941314-124941584*N_Shore	12	chr12:124941314-124941584	N_Shore	NCOR2	2.50233e-05	0.000565812	3	3	cg02666020	124941307	9.61534e-05	0.00539252	0.283854	0.324084	0.337027	-0.0531729	0.0297208	0.0341834	0.0269951	0
chr22:29707479-29707797*Island	22	chr22:29707479-29707797	Island	GAS2L1	2.5184e-05	0.000568892	3	3	cg03669698	29707524	0.000111689	0.0060621	0.829957	0.736029	0.747054	0.0829031	0.0560493	0.0630376	0.0395161	0
chr8:145024449-145025179*Island	8	chr8:145024449-145025179	Island	PLEC1	2.5195e-05	0.000568892	9	8	cg01753788	145024929	9.43595e-06	0.000837641	0.419465	0.376279	0.37314	0.0463248	0.0357261	0.0312289	0.028204	0
chr17:73627542-73627824*S_Shelf	17	chr17:73627542-73627824	S_Shelf	LOC643008	2.54937e-05	0.000575342	4	4	cg09354263	73631460	2.23193e-05	0.00168577	0.731803	0.677998	0.704162	0.0276404	0.0334743	0.0503378	0.0297419	0
chr17:73627542-73627824*S_Shelf	17	chr17:73627542-73627824	S_Shelf	RECQL5	2.54937e-05	0.000575342	4	4	cg09354263	73631460	2.23193e-05	0.00168577	0.731803	0.677998	0.704162	0.0276404	0.0334743	0.0503378	0.0297419	0
chr20:62679424-62680883*Island	20	chr20:62679424-62680883	Island	SOX18	2.56394e-05	0.000578261	5	5	cg02231404	62679635	2.71909e-06	0.000300397	0.463153	0.592784	0.566326	-0.103172	0.0930505	0.0907377	0.0696649	0
chr7:100463758-100464146*N_Shore	7	chr7:100463758-100464146	N_Shore	TRIP6	2.57896e-05	0.00058135	4	4	cg26305174	100463583	8.55339e-07	0.000115054	0.536316	0.409731	0.454095	0.0822211	0.0612357	0.0526036	0.0661528	0
chr7:100463758-100464146*N_Shore	7	chr7:100463758-100464146	N_Shore	SLC12A9	2.57896e-05	0.00058135	4	4	cg26305174	100463583	8.55339e-07	0.000115054	0.536316	0.409731	0.454095	0.0822211	0.0612357	0.0526036	0.0661528	0
chr1:221054554-221054888*Island	1	chr1:221054554-221054888	Island	HLX	2.59368e-05	0.000584303	3	3	cg12479878	221054825	1.94578e-06	0.000229804	0.115557	0.0604793	0.060382	0.0551751	0.0376489	0.0137781	0.015353	0
chr12:21590469-21590785*N_Shore	12	chr12:21590469-21590785	N_Shore	PYROXD1	2.59438e-05	0.000584303	4	4	cg21962791	21590305	1.21156e-05	0.00102442	0.438783	0.333089	0.377374	0.0614089	0.0343857	0.054142	0.0391887	0
chr22:29601547-29602291*Island	22	chr22:29601547-29602291	Island	EMID1	2.59756e-05	0.000584422	8	8	cg04206417	29601559	1.45757e-06	0.000181001	0.295485	0.249872	0.265718	0.0297671	0.0370172	0.0384744	0.0301449	0
chr12:57940563-57940981*S_Shore	12	chr12:57940563-57940981	S_Shore	DCTN2	2.59998e-05	0.000584667	4	4	cg23752828	57941309	8.13163e-07	0.000110652	0.160507	0.115774	0.134552	0.0259546	0.0376812	0.0271127	0.0301095	0
chr12:13044042-13044667*N_Shore	12	chr12:13044042-13044667	N_Shore	GPRC5A	2.61968e-05	0.000588646	6	6	cg03353445	13043502	3.84942e-06	0.000399546	0.527807	0.583676	0.583312	-0.0555046	0.0380539	0.0494951	0.0319303	0
chr9:140134706-140136568*Island	9	chr9:140134706-140136568	Island	TUBB2C	2.62526e-05	0.000589326	5	5	cg18836847	140136534	1.6969e-06	0.000205224	0.163033	0.12666	0.136882	0.0261505	0.018141	0.0204886	0.0125354	0
chr5:63461448-63462106*N_Shore	5	chr5:63461448-63462106	N_Shore	RNF180	2.62572e-05	0.000589326	4	4	cg17621438	63461216	0.00275539	0.0675567	0.326869	0.217105	0.290737	0.0361312	0.0387814	0.0374831	0.0574423	0
chr6:64282151-64283736*N_Shore	6	chr6:64282151-64283736	N_Shore	PTP4A1	2.66548e-05	0.000597512	9	9	cg05394244	64281439	2.46674e-06	0.00027673	0.517137	0.440753	0.41178	0.105357	0.0494119	0.064662	0.0489902	0
chr20:44420497-44420868*S_Shore	20	chr20:44420497-44420868	S_Shore	DNTTIP1	2.66625e-05	0.000597512	3	3	cg17240987	44421576	5.03015e-05	0.00322668	0.0826792	0.0703568	0.0748321	0.00784704	0.0191487	0.0155154	0.0131419	0
chr20:44420497-44420868*S_Shore	20	chr20:44420497-44420868	S_Shore	WFDC3	2.66625e-05	0.000597512	3	3	cg17240987	44421576	5.03015e-05	0.00322668	0.0826792	0.0703568	0.0748321	0.00784704	0.0191487	0.0155154	0.0131419	0
chr1:6259178-6259883*S_Shore	1	chr1:6259178-6259883	S_Shore	RPL22	2.67957e-05	0.000599556	7	7	cg27527922	6260181	1.27387e-05	0.00106738	0.486644	0.452857	0.452122	0.0345223	0.0325747	0.0393646	0.0246989	0
chr19:49925626-49926012*S_Shore	19	chr19:49925626-49926012	S_Shore	PTH2	2.68082e-05	0.000599556	9	9	cg08340482	49927244	1.3405e-06	0.000168361	0.224906	0.30913	0.295559	-0.0706526	0.0375506	0.057022	0.0349666	0
chr19:8807813-8808794*S_Shore	19	chr19:8807813-8808794	S_Shore	ACTL9	2.68637e-05	0.000600263	8	7	cg01621764	8809175	1.90613e-06	0.000225727	0.835225	0.759978	0.787977	0.0472472	0.0299783	0.0599855	0.0391402	0
chr14:24605082-24605760*N_Shore	14	chr14:24605082-24605760	N_Shore	PSME1	2.68843e-05	0.000600496	3	3	cg25268718	24604711	1.12918e-06	0.000144791	0.576696	0.493257	0.535026	0.0416704	0.025604	0.0462048	0.0272725	0
chr20:62200085-62200320*N_Shore	20	chr20:62200085-62200320	N_Shore	PRIC285	2.69347e-05	0.000601316	4	4	cg17593958	62199034	0.000111061	0.00603459	0.158777	0.100379	0.116833	0.0419437	0.0347491	0.0289061	0.0307177	0
chr22:21399979-21400270*N_Shore	22	chr22:21399979-21400270	N_Shore	P2RX6P	2.70885e-05	0.000604137	8	8	cg20004634	21399591	5.97728e-05	0.00370085	0.0822897	0.0534507	0.0601358	0.0221539	0.0275829	0.0185511	0.0183582	0
chr22:21399979-21400270*N_Shore	22	chr22:21399979-21400270	N_Shore	LOC400891	2.70885e-05	0.000604137	8	8	cg20004634	21399591	5.97728e-05	0.00370085	0.0822897	0.0534507	0.0601358	0.0221539	0.0275829	0.0185511	0.0183582	0
chr3:135969040-135969565*S_Shore	3	chr3:135969040-135969565	S_Shore	PCCB	2.71148e-05	0.000604418	4	4	cg14720207	135969981	1.48242e-06	0.00018344	0.172824	0.0974549	0.117434	0.0553898	0.0329826	0.0273592	0.0383189	0
chr1:26146122-26147349*N_Shore	1	chr1:26146122-26147349	N_Shore	FAM54B	2.71772e-05	0.000605502	4	4	cg13876650	26146005	4.76872e-05	0.0030878	0.435556	0.378564	0.403715	0.0318416	0.0259937	0.0339128	0.0323894	0
chr18:24764951-24765507*Island	18	chr18:24764951-24765507	Island	CHST9	2.7367e-05	0.00060927	6	6	cg16933181	24765485	3.78081e-06	0.000393515	0.11921	0.153994	0.115892	0.00331807	0.037012	0.0323728	0.0284433	0
chr3:187871478-187872354*N_Shore	3	chr3:187871478-187872354	N_Shore	LPP	2.75298e-05	0.000612109	7	7	cg19599666	187871024	3.01659e-05	0.00215642	0.442428	0.357708	0.372312	0.0701163	0.0564643	0.0434793	0.0415478	0
chr13:36052553-36053119*N_Shore	13	chr13:36052553-36053119	N_Shore	MIR548F5	2.75536e-05	0.000612109	10	10	cg13446906	36051073	3.52515e-06	0.00037107	0.145914	0.188757	0.216308	-0.0703937	0.0225435	0.0335276	0.0323636	0
chr13:36052553-36053119*N_Shore	13	chr13:36052553-36053119	N_Shore	NBEA	2.75536e-05	0.000612109	10	10	cg13446906	36051073	3.52515e-06	0.00037107	0.145914	0.188757	0.216308	-0.0703937	0.0225435	0.0335276	0.0323636	0
chr13:36052553-36053119*N_Shore	13	chr13:36052553-36053119	N_Shore	MAB21L1	2.75536e-05	0.000612109	10	10	cg13446906	36051073	3.52515e-06	0.00037107	0.145914	0.188757	0.216308	-0.0703937	0.0225435	0.0335276	0.0323636	0
chr10:6130786-6131774*N_Shore	10	chr10:6130786-6131774	N_Shore	RBM17	2.7625e-05	0.000613464	3	3	cg15953921	6130580	8.8264e-06	0.000793121	0.592464	0.534537	0.549878	0.0425861	0.030181	0.0613074	0.0352833	0
chr5:79551369-79552294*S_Shore	5	chr5:79551369-79552294	S_Shore	SERINC5	2.78143e-05	0.000617432	3	3	cg00024404	79552470	0.000690583	0.0248293	0.138259	0.106355	0.112824	0.025435	0.0164292	0.0214331	0.0166463	0
chr2:79739696-79740243*Island	2	chr2:79739696-79740243	Island	CTNNA2	2.7907e-05	0.000618471	6	6	cg04670857	79740208	1.87351e-06	0.000222461	0.149958	0.186773	0.153333	-0.00337479	0.047775	0.0368221	0.0364189	0
chr13:111038079-111038401*S_Shore	13	chr13:111038079-111038401	S_Shore	COL4A2	2.79117e-05	0.000618471	3	3	cg15455643	111040242	1.84295e-06	0.000219572	0.246862	0.363339	0.354557	-0.107695	0.0612602	0.0949352	0.0682342	0
chr8:145730390-145732205*N_Shore	8	chr8:145730390-145732205	N_Shore	GPT	2.79558e-05	0.000618471	18	18	cg17869161	145729373	1.14016e-06	0.000145798	0.619885	0.597044	0.604774	0.0151111	0.0293658	0.036682	0.0207043	0
chr7:27203915-27206462*N_Shore	7	chr7:27203915-27206462	N_Shore	HOXA9	2.79723e-05	0.000618603	3	3	cg21007852	27203546	5.21937e-06	0.000514379	0.17496	0.171845	0.193492	-0.0185316	0.0280386	0.0283225	0.0330481	0
chr7:2774444-2774655*S_Shore	7	chr7:2774444-2774655	S_Shore	GNA12	2.84141e-05	0.000627901	6	6	cg23009067	2775923	4.96377e-06	0.000492772	0.81856	0.748833	0.77429	0.0442703	0.0212157	0.0558269	0.0363697	0
chr15:42174084-42174855*Island	15	chr15:42174084-42174855	Island	SPTBN5	2.84634e-05	0.000628752	3	3	cg17631390	42174823	1.37822e-06	0.000171995	0.449038	0.398094	0.398451	0.0505869	0.0457232	0.0535829	0.0350854	0
chr9:117160139-117161064*N_Shelf	9	chr9:117160139-117161064	N_Shelf	AKNA	2.8488e-05	0.000628982	5	4	cg14260530	117157871	2.35851e-06	0.000267093	0.691649	0.630521	0.636444	0.0552043	0.0324558	0.0458772	0.032862	0
chr17:17603583-17604147*Island	17	chr17:17603583-17604147	Island	RAI1	2.86279e-05	0.000631754	4	4	cg27208169	17603584	9.60288e-07	0.000127132	0.622119	0.546043	0.563691	0.0584286	0.0423304	0.0560411	0.0392685	0
chr14:70038108-70040302*Island	14	chr14:70038108-70040302	Island	C14orf162	2.86554e-05	0.000631806	7	7	cg14912575	70038236	4.53857e-06	0.000456998	0.427005	0.352054	0.341172	0.0858329	0.0597291	0.0615017	0.0408451	0
chr6:45389420-45391646*S_Shore	6	chr6:45389420-45391646	S_Shore	RUNX2	2.91455e-05	0.000642371	3	3	cg17636752	45391973	0.00028187	0.0125015	0.25329	0.206101	0.187076	0.066214	0.0480523	0.0415765	0.0401696	0
chr19:11616031-11616847*S_Shore	19	chr19:11616031-11616847	S_Shore	ZNF653	2.92473e-05	0.000643921	4	4	cg13520520	11616957	3.85751e-06	0.00040008	0.330783	0.307477	0.27836	0.0524231	0.0443833	0.0569943	0.0276052	0
chr19:11616031-11616847*S_Shore	19	chr19:11616031-11616847	S_Shore	ECSIT	2.92473e-05	0.000643921	4	4	cg13520520	11616957	3.85751e-06	0.00040008	0.330783	0.307477	0.27836	0.0524231	0.0443833	0.0569943	0.0276052	0
chr3:133613566-133615174*Island	3	chr3:133613566-133615174	Island	RAB6B	2.92706e-05	0.000643921	12	11	cg16954004	133613567	9.73833e-07	0.000128636	0.427812	0.490869	0.483252	-0.05544	0.0262422	0.0507406	0.0357026	0
chr16:682634-687106*N_Shore	16	chr16:682634-687106	N_Shore	WFIKKN1	2.95184e-05	0.000649047	4	4	cg01458062	681057	4.31932e-05	0.00286176	0.140184	0.109928	0.107404	0.0327806	0.0300547	0.0197911	0.024018	0
chr22:38035350-38035928*N_Shore	22	chr22:38035350-38035928	N_Shore	SH3BP1	2.95523e-05	0.000649551	3	3	cg07397616	38035109	6.6388e-05	0.00404086	0.437798	0.47809	0.505566	-0.0677677	0.0305492	0.0423318	0.0337097	0
chr21:46494173-46495472*S_Shore	21	chr21:46494173-46495472	S_Shore	ADARB1	2.99837e-05	0.000658785	3	3	cg23662138	46495607	9.47648e-05	0.00533843	0.332081	0.228157	0.224157	0.107924	0.0564388	0.0448395	0.0435009	0
chr1:223899990-223900823*N_Shore	1	chr1:223899990-223900823	N_Shore	CAPN2	3.00512e-05	0.000659856	5	5	cg01566170	223899746	1.78888e-05	0.00140849	0.575642	0.551626	0.563125	0.0125172	0.048963	0.0464376	0.0400867	0
chr19:49842654-49843628*Island	19	chr19:49842654-49843628	Island	CD37	3.02314e-05	0.000662948	5	4	cg17393635	49843565	2.63755e-06	0.000293042	0.668516	0.638008	0.621266	0.0472499	0.0377112	0.0444777	0.0305339	0
chr13:42534880-42535461*Island	13	chr13:42534880-42535461	Island	KIAA0564	3.02371e-05	0.000662948	8	8	cg02995055	42535448	1.95245e-06	0.000230284	0.0505243	0.0700004	0.0783739	-0.0278496	0.0136326	0.0225721	0.0183945	0
chr1:197890478-197890824*Island	1	chr1:197890478-197890824	Island	LHX9	3.04899e-05	0.000667975	3	3	cg26816907	197890812	1.55688e-05	0.00126133	0.235937	0.291711	0.297183	-0.0612451	0.0286139	0.0483711	0.0321356	0
chr1:17746200-17746547*Island	1	chr1:17746200-17746547	Island	RCC2	3.0505e-05	0.00066799	5	3	cg00794400	17746510	0.000146059	0.00744709	0.210387	0.178268	0.163797	0.0465899	0.0420136	0.0364927	0.0344041	0
chr1:3104956-3105253*Island	1	chr1:3104956-3105253	Island	PRDM16	3.0738e-05	0.000672758	4	4	cg00254258	3105189	0.00569825	0.112002	0.685921	0.543877	0.573889	0.112032	0.13682	0.0990996	0.0957644	0
chr3:139257712-139257949*S_Shore	3	chr3:139257712-139257949	S_Shore	RBP1	3.09789e-05	0.000677442	8	7	cg21476463	139259926	0.0037718	0.0840573	0.699683	0.739452	0.733736	-0.0340528	0.039346	0.0322002	0.0265245	0
chr6:33377929-33379167*N_Shelf	6	chr6:33377929-33379167	N_Shelf	KIFC1	3.11788e-05	0.000680292	21	18	cg18796027	33375357	2.09284e-05	0.00159715	0.462709	0.424658	0.441431	0.0212785	0.0333162	0.0459233	0.0389844	0
chr20:33264666-33265193*S_Shore	20	chr20:33264666-33265193	S_Shore	PIGU	3.14025e-05	0.000684919	3	3	cg05054831	33265543	1.32731e-05	0.00110422	0.314461	0.242606	0.248117	0.066344	0.0538415	0.0567309	0.0433398	0
chr19:19639552-19639788*Island	19	chr19:19639552-19639788	Island	YJEFN3	3.14835e-05	0.000686348	4	4	cg22782873	19639568	0.000153567	0.00775366	0.735292	0.71233	0.71406	0.021232	0.0252591	0.0380365	0.0351472	0
chr11:60609392-60609786*N_Shore	11	chr11:60609392-60609786	N_Shore	CCDC86	3.1697e-05	0.000690573	6	5	cg23904249	60608951	0.00857194	0.146676	0.81595	0.797698	0.768248	0.0477017	0.0599337	0.0740405	0.0620448	0
chr12:22777988-22778301*N_Shore	12	chr12:22777988-22778301	N_Shore	ETNK1	3.17624e-05	0.000691315	8	8	cg21477262	22777430	3.62541e-05	0.00249936	0.867983	0.840899	0.840913	0.0270695	0.0222452	0.0488557	0.0166302	0
chr1:156469617-156471060*N_Shelf	1	chr1:156469617-156471060	N_Shelf	MEF2D	3.18126e-05	0.00069198	5	5	cg17479280	156466088	0.000118918	0.00637693	0.71621	0.718298	0.694467	0.0217422	0.0492979	0.0417906	0.0512866	0
chr19:39687597-39687964*N_Shore	19	chr19:39687597-39687964	N_Shore	NCCRP1	3.20507e-05	0.000696728	5	5	cg18627816	39686695	8.55626e-06	0.00077358	0.244783	0.315204	0.307168	-0.0623844	0.0309563	0.0528399	0.0355169	0
chr11:2013333-2013617*N_Shore	11	chr11:2013333-2013617	N_Shore	LOC100133545	3.22864e-05	0.000701333	6	6	cg20494635	2012071	3.5701e-06	0.000374516	0.737217	0.661857	0.685051	0.0521665	0.0364274	0.0472626	0.0265162	0
chr2:216300267-216300997*N_Shore	2	chr2:216300267-216300997	N_Shore	FN1	3.24661e-05	0.000702719	3	3	cg03228449	216299545	1.67564e-06	0.000203211	0.674689	0.791559	0.776257	-0.101567	0.0476926	0.0514072	0.0349646	0
chr2:121101800-121104534*Island	2	chr2:121101800-121104534	Island	INHBB	3.25016e-05	0.000702719	8	8	cg03699182	121104187	2.15494e-05	0.00163674	0.0526789	0.0866684	0.0499978	0.00268118	0.0355183	0.0355681	0.0246266	0
chr6:30227320-30228255*Island	6	chr6:30227320-30228255	Island	HLA-L	3.25296e-05	0.000702719	38	34	cg26993102	30228245	5.53384e-05	0.00348383	0.566064	0.670618	0.636854	-0.0707902	0.0367085	0.0589915	0.0492866	0
chr14:24835810-24836220*N_Shore	14	chr14:24835810-24836220	N_Shore	NFATC4	3.28925e-05	0.000710211	6	4	cg14058476	24835609	8.54678e-05	0.00493297	0.768309	0.797217	0.793934	-0.0256259	0.0307755	0.0300247	0.0265569	0
chr19:1230974-1231323*Island	19	chr19:1230974-1231323	Island	C19orf26	3.29536e-05	0.000711268	3	3	cg01297744	1230988	6.08178e-05	0.00375632	0.823283	0.786485	0.796181	0.0271021	0.0200528	0.0271901	0.0229178	0
chr13:111978588-111979099*N_Shore	13	chr13:111978588-111979099	N_Shore	C13orf16	3.30302e-05	0.000712396	6	6	cg03299636	111977473	1.81329e-06	0.000216624	0.637978	0.723065	0.719807	-0.0818291	0.0408341	0.0459234	0.0316756	0
chr1:68512643-68513005*Island	1	chr1:68512643-68513005	Island	DIRAS3	3.30787e-05	0.000712919	6	6	cg20149168	68512807	7.65065e-06	0.000705826	0.55506	0.6858	0.620863	-0.0658032	0.0413927	0.0585652	0.0564613	0
chr8:141467218-141467927*S_Shore	8	chr8:141467218-141467927	S_Shore	TRAPPC9	3.31684e-05	0.000714241	7	7	cg21093033	141468743	0.000403214	0.0164089	0.300982	0.216129	0.204074	0.0969078	0.0618193	0.0386716	0.0327889	0
chr1:38022452-38022719*Island	1	chr1:38022452-38022719	Island	DNALI1	3.33776e-05	0.000718219	6	6	cg21488617	38022586	1.39864e-06	0.000174297	0.466413	0.41656	0.415573	0.0508397	0.0330065	0.0487146	0.0271369	0
chr16:4421642-4422240*N_Shore	16	chr16:4421642-4422240	N_Shore	CORO7	3.33965e-05	0.000718275	4	4	cg09276451	4421603	3.57065e-06	0.000374516	0.646693	0.609376	0.612085	0.0346085	0.0358395	0.044153	0.0405975	0
chr16:4421642-4422240*N_Shore	16	chr16:4421642-4422240	N_Shore	VASN	3.33965e-05	0.000718275	4	4	cg09276451	4421603	3.57065e-06	0.000374516	0.646693	0.609376	0.612085	0.0346085	0.0358395	0.044153	0.0405975	0
chr1:47696504-47698197*N_Shore	1	chr1:47696504-47698197	N_Shore	TAL1	3.37009e-05	0.000724027	9	9	cg11399254	47694517	0.000352451	0.0148366	0.461222	0.427595	0.45315	0.00807201	0.0528605	0.0427039	0.0492152	0
chr1:53386617-53387523*Island	1	chr1:53386617-53387523	Island	ECHDC2	3.38336e-05	0.000724437	5	4	cg10554624	53386618	2.76976e-06	0.000305612	0.613002	0.654413	0.68801	-0.0750079	0.0494814	0.0796181	0.0357832	0
chr6:31856896-31857104*S_Shelf	6	chr6:31856896-31857104	S_Shelf	EHMT2	3.38533e-05	0.000724437	20	19	cg01667634	31860439	1.97185e-06	0.000231641	0.486932	0.559369	0.564485	-0.0775532	0.0409572	0.0386418	0.049742	0
chr22:24890412-24891453*Island	22	chr22:24890412-24891453	Island	C22orf45	3.38885e-05	0.000724437	15	15	cg16592832	24891141	1.58766e-05	0.00128038	0.563438	0.562226	0.468524	0.0949136	0.0623517	0.0970613	0.0725019	0
chr22:24890412-24891453*Island	22	chr22:24890412-24891453	Island	UPB1	3.38885e-05	0.000724437	15	15	cg16592832	24891141	1.58766e-05	0.00128038	0.563438	0.562226	0.468524	0.0949136	0.0623517	0.0970613	0.0725019	0
chr4:41215871-41216813*N_Shore	4	chr4:41215871-41216813	N_Shore	APBB2	3.4649e-05	0.000740334	4	4	cg24992745	41215654	0.000498599	0.0192588	0.120213	0.135826	0.130551	-0.0103387	0.0201296	0.0177279	0.0154764	0
chr6:167587354-167587559*S_Shore	6	chr6:167587354-167587559	S_Shore	TCP10L2	3.47013e-05	0.000741092	4	4	cg15824873	167587692	2.92025e-05	0.00210248	0.709763	0.766088	0.77606	-0.0662974	0.0469706	0.032849	0.0291278	0
chr7:99746253-99746643*N_Shore	7	chr7:99746253-99746643	N_Shore	C7orf59	3.47527e-05	0.000741921	3	3	cg03818034	99746088	1.11925e-06	0.000143855	0.164624	0.137974	0.142478	0.0221466	0.018468	0.0226167	0.0188831	0
chr8:80679669-80681007*N_Shore	8	chr8:80679669-80681007	N_Shore	HEY1	3.49554e-05	0.000745885	4	4	cg16684661	80678770	1.55621e-06	0.000190696	0.179309	0.205875	0.20497	-0.0256612	0.037932	0.0400822	0.040837	0
chr16:69139628-69141900*Island	16	chr16:69139628-69141900	Island	HAS3	3.51747e-05	0.000749657	11	10	cg16524960	69141345	3.77302e-06	0.000392936	0.060879	0.095964	0.081228	-0.020349	0.0145663	0.0223717	0.0158818	0
chr5:140779013-140779659*N_Shore	5	chr5:140779013-140779659	N_Shore	PCDHGB3	3.51983e-05	0.000749798	4	4	cg11655243	140778396	0.0321358	0.329321	0.316845	0.3095	0.258142	0.0587027	0.0748952	0.0981344	0.0444765	0
chr5:140779013-140779659*N_Shore	5	chr5:140779013-140779659	N_Shore	PCDHGA5	3.51983e-05	0.000749798	4	4	cg11655243	140778396	0.0321358	0.329321	0.316845	0.3095	0.258142	0.0587027	0.0748952	0.0981344	0.0444765	0
chr5:140779013-140779659*N_Shore	5	chr5:140779013-140779659	N_Shore	PCDHGA8	3.51983e-05	0.000749798	4	4	cg11655243	140778396	0.0321358	0.329321	0.316845	0.3095	0.258142	0.0587027	0.0748952	0.0981344	0.0444765	0
chr5:140779013-140779659*N_Shore	5	chr5:140779013-140779659	N_Shore	PCDHGA4	3.51983e-05	0.000749798	4	4	cg11655243	140778396	0.0321358	0.329321	0.316845	0.3095	0.258142	0.0587027	0.0748952	0.0981344	0.0444765	0
chr5:140779013-140779659*N_Shore	5	chr5:140779013-140779659	N_Shore	PCDHGB4	3.51983e-05	0.000749798	4	4	cg11655243	140778396	0.0321358	0.329321	0.316845	0.3095	0.258142	0.0587027	0.0748952	0.0981344	0.0444765	0
chr5:140779013-140779659*N_Shore	5	chr5:140779013-140779659	N_Shore	PCDHGB2	3.51983e-05	0.000749798	4	4	cg11655243	140778396	0.0321358	0.329321	0.316845	0.3095	0.258142	0.0587027	0.0748952	0.0981344	0.0444765	0
chr5:140779013-140779659*N_Shore	5	chr5:140779013-140779659	N_Shore	PCDHGB1	3.51983e-05	0.000749798	4	4	cg11655243	140778396	0.0321358	0.329321	0.316845	0.3095	0.258142	0.0587027	0.0748952	0.0981344	0.0444765	0
chr5:140779013-140779659*N_Shore	5	chr5:140779013-140779659	N_Shore	PCDHGA1	3.51983e-05	0.000749798	4	4	cg11655243	140778396	0.0321358	0.329321	0.316845	0.3095	0.258142	0.0587027	0.0748952	0.0981344	0.0444765	0
chr5:140779013-140779659*N_Shore	5	chr5:140779013-140779659	N_Shore	PCDHGA2	3.51983e-05	0.000749798	4	4	cg11655243	140778396	0.0321358	0.329321	0.316845	0.3095	0.258142	0.0587027	0.0748952	0.0981344	0.0444765	0
chr5:140779013-140779659*N_Shore	5	chr5:140779013-140779659	N_Shore	PCDHGA3	3.51983e-05	0.000749798	4	4	cg11655243	140778396	0.0321358	0.329321	0.316845	0.3095	0.258142	0.0587027	0.0748952	0.0981344	0.0444765	0
chr5:140779013-140779659*N_Shore	5	chr5:140779013-140779659	N_Shore	PCDHGB5	3.51983e-05	0.000749798	4	4	cg11655243	140778396	0.0321358	0.329321	0.316845	0.3095	0.258142	0.0587027	0.0748952	0.0981344	0.0444765	0
chr5:140779013-140779659*N_Shore	5	chr5:140779013-140779659	N_Shore	PCDHGA6	3.51983e-05	0.000749798	4	4	cg11655243	140778396	0.0321358	0.329321	0.316845	0.3095	0.258142	0.0587027	0.0748952	0.0981344	0.0444765	0
chr5:140779013-140779659*N_Shore	5	chr5:140779013-140779659	N_Shore	PCDHGA7	3.51983e-05	0.000749798	4	4	cg11655243	140778396	0.0321358	0.329321	0.316845	0.3095	0.258142	0.0587027	0.0748952	0.0981344	0.0444765	0
chr11:6632879-6633787*N_Shore	11	chr11:6632879-6633787	N_Shore	TAF10	3.52458e-05	0.000750448	4	4	cg25879836	6632799	3.05623e-05	0.00217768	0.326253	0.263135	0.278789	0.0474647	0.033811	0.0342226	0.0287829	0
chr20:62257589-62259476*Island	20	chr20:62257589-62259476	Island	GMEB2	3.5322e-05	0.000751524	6	6	cg10927510	62259125	2.09367e-06	0.000241854	0.0699071	0.040261	0.0430535	0.0268537	0.0183589	0.0161397	0.0121998	0
chr7:157413901-157414146*N_Shore	7	chr7:157413901-157414146	N_Shore	PTPRN2	3.5519e-05	0.000754041	8	8	cg20519944	157412886	1.19051e-05	0.00101002	0.693645	0.641546	0.659222	0.0344236	0.0333007	0.0555361	0.0345773	0
chr17:4487398-4488482*Island	17	chr17:4487398-4488482	Island	SMTNL2	3.55263e-05	0.000754041	6	6	cg12213111	4488481	2.47714e-05	0.00183403	0.259418	0.305598	0.299501	-0.0400834	0.0311099	0.0389091	0.0236168	0
chr11:62413632-62414293*S_Shore	11	chr11:62413632-62414293	S_Shore	GANAB	3.55433e-05	0.000754041	5	5	cg12954619	62414700	4.35058e-05	0.0028777	0.610313	0.5689	0.570739	0.0395731	0.027905	0.0453536	0.0249394	0
chr11:62413632-62414293*S_Shore	11	chr11:62413632-62414293	S_Shore	INTS5	3.55433e-05	0.000754041	5	5	cg12954619	62414700	4.35058e-05	0.0028777	0.610313	0.5689	0.570739	0.0395731	0.027905	0.0453536	0.0249394	0
chr13:93879245-93880877*Island	13	chr13:93879245-93880877	Island	GPC6	3.55472e-05	0.000754041	7	6	cg12989574	93879544	1.33102e-06	0.000167409	0.0913592	0.123028	0.10363	-0.0122704	0.0339854	0.025489	0.0196108	0
chr19:5843864-5844373*N_Shelf	19	chr19:5843864-5844373	N_Shelf	FUT6	3.55733e-05	0.000754231	4	4	cg13492223	5839901	5.66086e-06	0.000550804	0.486979	0.45682	0.476572	0.0104068	0.0285096	0.0330863	0.0304955	0
chr10:25011963-25013816*N_Shore	10	chr10:25011963-25013816	N_Shore	ARHGAP21	3.58796e-05	0.000760201	4	4	cg00056066	25010738	2.18169e-06	0.000250419	0.734769	0.572801	0.59515	0.139618	0.0636755	0.0965903	0.0596233	0
chr1:28969553-28969898*S_Shore	1	chr1:28969553-28969898	S_Shore	TAF12	3.58851e-05	0.000760201	3	3	cg03747028	28970259	0.00019278	0.00927889	0.0248821	0.0168899	0.0131314	0.0117506	0.0106019	0.0106819	0.00756729	0
chr3:183892455-183893184*S_Shore	3	chr3:183892455-183893184	S_Shore	AP2M1	3.59113e-05	0.000760391	4	4	cg05573306	183894763	2.8804e-05	0.00208016	0.861415	0.842014	0.83386	0.0275547	0.0183218	0.0273385	0.0260048	0
chr15:75917646-75918212*S_Shore	15	chr15:75917646-75918212	S_Shore	SNUPN	3.60367e-05	0.000762403	7	7	cg23097139	75918757	4.5195e-05	0.00296164	0.639456	0.615235	0.614527	0.0249292	0.0308701	0.0461551	0.033905	0
chr5:176918574-176919659*Island	5	chr5:176918574-176919659	Island	PDLIM7	3.60965e-05	0.000763154	5	5	cg21410283	176918593	3.13922e-05	0.00222515	0.552316	0.527941	0.518623	0.0336931	0.0406112	0.0503301	0.0275789	0
chr17:62774366-62777797*N_Shore	17	chr17:62774366-62777797	N_Shore	LOC146880	3.61068e-05	0.000763154	3	3	cg15798221	62773704	0.00037975	0.0157157	0.240418	0.207	0.206121	0.0342975	0.0400932	0.0335511	0.0367997	0
chr4:111397677-111398089*N_Shore	4	chr4:111397677-111398089	N_Shore	ENPEP	3.62249e-05	0.000764727	10	9	cg08733482	111395729	6.31671e-05	0.0038783	0.769	0.737543	0.741148	0.0278523	0.0365533	0.0493018	0.0293953	0
chr6:56112188-56112444*N_Shore	6	chr6:56112188-56112444	N_Shore	COL21A1	3.6243e-05	0.000764727	3	3	cg07143470	56111812	1.50608e-06	0.000185976	0.125034	0.208052	0.225172	-0.100138	0.0374216	0.0795613	0.0717128	0
chr22:31556124-31556466*N_Shore	22	chr22:31556124-31556466	N_Shore	RNF185	3.62724e-05	0.000764727	9	9	cg11571442	31555852	3.22019e-06	0.000344862	0.174865	0.121368	0.120207	0.054658	0.056341	0.034508	0.0303688	0
chr6:10419399-10420323*Island	6	chr6:10419399-10420323	Island	TFAP2A	3.63352e-05	0.000765228	10	9	cg00906973	10419835	7.64323e-06	0.000705512	0.139312	0.154719	0.13956	-0.000247421	0.0242002	0.0235894	0.0153582	0
chr12:131517267-131517624*N_Shore	12	chr12:131517267-131517624	N_Shore	GPR133	3.64415e-05	0.000767009	5	5	cg13381015	131517024	2.10807e-05	0.0016046	0.665981	0.608122	0.594526	0.0714554	0.0530527	0.0486195	0.0358084	0
chr11:31820060-31821416*N_Shelf	11	chr11:31820060-31821416	N_Shelf	PAX6	3.65745e-05	0.000769471	3	3	cg25764105	31817810	4.26203e-06	0.000433862	0.237428	0.308741	0.286125	-0.0486967	0.0325831	0.0505802	0.0330964	0
chr1:145589135-145589535*S_Shore	1	chr1:145589135-145589535	S_Shore	NUDT17	3.65847e-05	0.000769471	3	3	cg15521792	145590148	1.31759e-06	0.000166103	0.707505	0.609809	0.574415	0.13309	0.0734039	0.0834757	0.0626558	0
chr5:125930601-125931049*N_Shore	5	chr5:125930601-125931049	N_Shore	ALDH7A1	3.6906e-05	0.000775208	5	5	cg03409151	125929671	3.14683e-06	0.000338114	0.725192	0.671506	0.687398	0.0377944	0.0463957	0.0584424	0.050892	0
chr7:116962841-116964803*Island	7	chr7:116962841-116964803	Island	WNT2	3.69235e-05	0.000775208	12	10	cg06987468	116963502	3.72904e-05	0.0025578	0.158467	0.180438	0.156098	0.00236914	0.0338615	0.0254669	0.0268035	0
chr12:58158855-58160000*S_Shore	12	chr12:58158855-58160000	S_Shore	CYP27B1	3.72786e-05	0.000782385	4	3	cg24722099	58160843	4.59873e-06	0.000461999	0.312084	0.285915	0.272645	0.0394385	0.02382	0.0269467	0.0255706	0
chr3:9773066-9773911*S_Shore	3	chr3:9773066-9773911	S_Shore	BRPF1	3.74553e-05	0.000785812	3	3	cg16449402	9774725	2.86621e-06	0.000314286	0.420319	0.475947	0.470772	-0.0504533	0.0211258	0.0332717	0.018942	0
chr10:131637098-131637310*N_Shore	10	chr10:131637098-131637310	N_Shore	EBF3	3.76608e-05	0.000789747	4	4	cg17720259	131636374	4.58006e-06	0.000460649	0.727024	0.838022	0.85315	-0.126127	0.0735129	0.049023	0.0344986	0
chr2:232260100-232261134*Island	2	chr2:232260100-232261134	Island	B3GNT7	3.78716e-05	0.000793411	8	8	cg20034202	232260136	3.54993e-06	0.000373232	0.27214	0.29756	0.299184	-0.0270445	0.0522729	0.0452819	0.0367962	0
chr17:79952141-79952494*N_Shelf	17	chr17:79952141-79952494	N_Shelf	ASPSCR1	3.79924e-05	0.000794993	6	5	cg10080728	79949717	1.02479e-05	0.00089573	0.748256	0.680059	0.669238	0.0790181	0.0293605	0.0691194	0.054332	0
chr16:1827104-1827405*N_Shore	16	chr16:1827104-1827405	N_Shore	EME2	3.79967e-05	0.000794993	6	6	cg02457346	1825936	0.00314414	0.0740486	0.656996	0.605346	0.626735	0.0302612	0.055875	0.0550924	0.0440679	0
chr2:161263871-161264460*Island	2	chr2:161263871-161264460	Island	RBMS1	3.82844e-05	0.000800728	3	3	cg18940113	161264053	6.73025e-06	0.000634195	0.0090848	0.00679803	0.00625882	0.00282598	0.00538625	0.00412393	0.00454895	0
chr19:49375484-49375928*S_Shore	19	chr19:49375484-49375928	S_Shore	PPP1R15A	3.83518e-05	0.000801851	3	3	cg04396998	49376722	2.28262e-06	0.000260002	0.559676	0.427439	0.467638	0.0920386	0.057884	0.0665652	0.0625951	0
chr16:1014739-1014976*Island	16	chr16:1014739-1014976	Island	LMF1	3.8467e-05	0.000803975	3	3	cg10244976	1014818	1.22593e-06	0.0001553	0.667778	0.768302	0.788534	-0.120756	0.0771484	0.0529056	0.0540445	0
chr3:172428416-172428950*S_Shore	3	chr3:172428416-172428950	S_Shore	NCEH1	3.85464e-05	0.000804965	7	7	cg14608275	172429421	4.9479e-06	0.000491474	0.686618	0.623409	0.649287	0.0373303	0.032201	0.0432788	0.033808	0
chr3:49893810-49894216*S_Shore	3	chr3:49893810-49894216	S_Shore	TRAIP	3.8813e-05	0.000810245	3	3	cg04884090	49894441	0.00021053	0.00994579	0.556065	0.497172	0.481987	0.0740777	0.0616706	0.0735778	0.0686024	0
chr7:2154677-2155252*N_Shelf	7	chr7:2154677-2155252	N_Shelf	MAD1L1	3.88631e-05	0.000810619	9	7	cg15309361	2152625	5.12559e-05	0.00327813	0.213575	0.232454	0.224376	-0.0108013	0.0464907	0.0317485	0.0418742	0
chr4:674843-676091*N_Shore	4	chr4:674843-676091	N_Shore	MYL5	3.88827e-05	0.000810739	3	3	cg00723338	674590	1.51388e-06	0.000186678	0.823822	0.755841	0.733051	0.0907713	0.0542981	0.0989938	0.0578183	0
chr5:92929268-92929489*N_Shore	5	chr5:92929268-92929489	N_Shore	NR2F1	3.90197e-05	0.000811964	3	3	cg01536884	92928458	3.49348e-05	0.00243366	0.490992	0.58113	0.58162	-0.0906281	0.0565688	0.0853287	0.0511737	0
chr1:2983925-2987962*Island	1	chr1:2983925-2987962	Island	PRDM16	3.90797e-05	0.000811964	28	27	cg18509466	2987961	3.52455e-06	0.00037107	0.257686	0.217207	0.218669	0.0390168	0.0321926	0.0237588	0.0270352	0
chr19:1254024-1254454*Island	19	chr19:1254024-1254454	Island	MIDN	3.95182e-05	0.000820785	3	3	cg07843568	1254066	1.702e-06	0.000205418	0.699323	0.634997	0.650913	0.0484094	0.0265782	0.0401024	0.0286133	0
chr19:17958490-17958808*S_Shore	19	chr19:17958490-17958808	S_Shore	JAK3	3.97857e-05	0.000825369	10	10	cg18145683	17959281	0.000520715	0.019951	0.320803	0.347598	0.371336	-0.0505338	0.0454806	0.0482668	0.0499771	0
chr11:43702016-43702597*N_Shore	11	chr11:43702016-43702597	N_Shore	HSD17B12	3.99232e-05	0.000827928	3	3	cg23575732	43701083	1.22625e-05	0.00103486	0.693872	0.662756	0.667842	0.0260297	0.0306288	0.0382014	0.0261167	0
chr13:48877459-48878501*N_Shore	13	chr13:48877459-48878501	N_Shore	RB1	4.00618e-05	0.000830119	7	7	cg13221796	48876919	9.62192e-06	0.000850295	0.750798	0.700979	0.705708	0.0450901	0.0260625	0.0481574	0.0430346	0
chr11:30038522-30038823*Island	11	chr11:30038522-30038823	Island	KCNA4	4.01552e-05	0.000831132	9	9	cg05756220	30038685	6.1511e-06	0.000591321	0.117855	0.148886	0.11863	-0.000774718	0.0456037	0.0348762	0.0297347	0
chr1:39456655-39457271*N_Shore	1	chr1:39456655-39457271	N_Shore	AKIRIN1	4.01673e-05	0.000831132	3	3	cg03130816	39456103	9.74293e-05	0.00543835	0.723027	0.639879	0.643034	0.079993	0.04682	0.0673678	0.0424446	0
chr11:76494416-76495672*N_Shore	11	chr11:76494416-76495672	N_Shore	TSKU	4.04742e-05	0.000836697	9	8	cg20886049	76493545	1.32882e-06	0.000167252	0.597551	0.645819	0.678412	-0.0808603	0.0394454	0.0581141	0.0299658	0
chr7:139762255-139763245*N_Shore	7	chr7:139762255-139763245	N_Shore	PARP12	4.0563e-05	0.000838236	3	3	cg05994974	139761087	1.34562e-05	0.0011153	0.311614	0.340018	0.378272	-0.0666583	0.0554472	0.0879759	0.0621697	0
chr5:141030918-141031177*Island	5	chr5:141030918-141031177	Island	FCHSD1	4.09361e-05	0.000844944	7	7	cg12927498	141031122	3.5202e-05	0.0024479	0.00190235	0.00251632	0.0037809	-0.00187855	0.00238502	0.00256758	0.00460037	0
chr15:80215358-80216500*Island	15	chr15:80215358-80216500	Island	C15orf37	4.09643e-05	0.000844944	9	9	cg11970192	80215376	0.0010383	0.0335987	0.105932	0.146542	0.141333	-0.0354016	0.0235425	0.0313277	0.0290099	0
chr15:80215358-80216500*Island	15	chr15:80215358-80216500	Island	ST20	4.09643e-05	0.000844944	9	9	cg11970192	80215376	0.0010383	0.0335987	0.105932	0.146542	0.141333	-0.0354016	0.0235425	0.0313277	0.0290099	0
chr7:93204085-93204381*S_Shore	7	chr7:93204085-93204381	S_Shore	CALCR	4.11935e-05	0.000848283	14	14	cg13095704	93205126	5.37875e-05	0.00340077	0.128836	0.154675	0.138841	-0.0100051	0.0220979	0.0258124	0.0179284	0
chr7:2419808-2420340*Island	7	chr7:2419808-2420340	Island	EIF3B	4.13043e-05	0.000849844	4	3	cg24695071	2419958	3.00484e-06	0.000326239	0.811122	0.715708	0.730547	0.0805756	0.051783	0.0500971	0.0462278	0
chr13:50570375-50571643*N_Shore	13	chr13:50570375-50571643	N_Shore	DLEU2	4.13172e-05	0.000849844	5	5	cg23213230	50570091	8.44408e-05	0.00489454	0.132294	0.137056	0.127034	0.00525988	0.0430505	0.0236135	0.0308221	0
chr13:50570375-50571643*N_Shore	13	chr13:50570375-50571643	N_Shore	TRIM13	4.13172e-05	0.000849844	5	5	cg23213230	50570091	8.44408e-05	0.00489454	0.132294	0.137056	0.127034	0.00525988	0.0430505	0.0236135	0.0308221	0
chr3:6902823-6903516*Island	3	chr3:6902823-6903516	Island	GRM7	4.13273e-05	0.000849844	5	4	cg02332525	6903153	3.19292e-06	0.000342439	0.188059	0.212169	0.182333	0.00572606	0.0404202	0.0249228	0.0303178	0
chr15:65669310-65670617*S_Shore	15	chr15:65669310-65670617	S_Shore	IGDCC3	4.15246e-05	0.000853505	4	4	cg27436286	65670863	0.00209387	0.0557684	0.291222	0.350167	0.32593	-0.0347079	0.0249475	0.0442232	0.0293188	0
chr2:114256775-114258043*N_Shore	2	chr2:114256775-114258043	N_Shore	FOXD4L1	4.1667e-05	0.000855932	5	5	cg14950303	114256392	1.6997e-06	0.000205281	0.408232	0.463203	0.458718	-0.0504859	0.0219712	0.0388808	0.0316882	0
chr3:156543891-156544405*N_Shore	3	chr3:156543891-156544405	N_Shore	LEKR1	4.19008e-05	0.000860334	4	4	cg08832018	156543647	2.21191e-06	0.000252437	0.34647	0.285439	0.302667	0.0438033	0.0400453	0.0329481	0.0336436	0
chr8:9008058-9009353*Island	8	chr8:9008058-9009353	Island	PPP1R3B	4.20065e-05	0.000861599	9	9	cg05806645	9009352	1.65942e-05	0.00132551	0.187719	0.131579	0.116403	0.0713162	0.0640509	0.0697688	0.0740553	0
chr11:66627530-66627732*Island	11	chr11:66627530-66627732	Island	PC	4.20575e-05	0.000862345	3	3	cg12596520	66627706	5.19535e-06	0.000513497	0.693022	0.651336	0.662864	0.0301584	0.0366323	0.0472211	0.0285297	0
chr11:66627530-66627732*Island	11	chr11:66627530-66627732	Island	LRFN4	4.20575e-05	0.000862345	3	3	cg12596520	66627706	5.19535e-06	0.000513497	0.693022	0.651336	0.662864	0.0301584	0.0366323	0.0472211	0.0285297	0
chr12:52214179-52216138*S_Shore	12	chr12:52214179-52216138	S_Shore	FIGNL2	4.2376e-05	0.000868269	6	6	cg23238293	52217217	0.00257399	0.0644298	0.659474	0.666016	0.68088	-0.0214053	0.0245237	0.0315465	0.0254065	0
chr14:74253387-74254188*N_Shelf	14	chr14:74253387-74254188	N_Shelf	C14orf43	4.25014e-05	0.000870536	3	3	cg25952104	74250584	3.19007e-06	0.000342342	0.699905	0.764897	0.761261	-0.0613559	0.0581816	0.065853	0.0433084	0
chr15:83680007-83680532*S_Shore	15	chr15:83680007-83680532	S_Shore	C15orf40	4.25691e-05	0.000871517	5	4	cg00202460	83680873	2.6321e-06	0.000292802	0.297334	0.233815	0.229378	0.0679564	0.0392596	0.0537086	0.0297038	0
chr11:1968558-1969003*N_Shore	11	chr11:1968558-1969003	N_Shore	MRPL23	4.27439e-05	0.000874383	7	7	cg09884480	1967966	3.88558e-05	0.00263847	0.664339	0.570964	0.599927	0.0644127	0.0435502	0.0731296	0.0486387	0
chr7:116139774-116140352*N_Shore	7	chr7:116139774-116140352	N_Shore	CAV2	4.29179e-05	0.000876723	12	12	cg11825652	116139367	1.42999e-05	0.00117364	0.379961	0.432691	0.426303	-0.0463421	0.034296	0.0555369	0.0257683	0
chr5:132158542-132159203*Island	5	chr5:132158542-132159203	Island	SHROOM1	4.30749e-05	0.000878313	5	5	cg12180613	132158560	1.753e-06	0.000210852	0.713593	0.665894	0.634283	0.0793097	0.0535353	0.0565667	0.0374912	0
chr19:36500169-36500530*N_Shore	19	chr19:36500169-36500530	N_Shore	C19orf46	4.30808e-05	0.000878313	4	4	cg18059891	36499721	6.23246e-05	0.00383727	0.525241	0.487462	0.480555	0.0446859	0.0522694	0.0565451	0.0336971	0
chr2:232394763-232395337*Island	2	chr2:232394763-232395337	Island	NMUR1	4.31065e-05	0.000878313	9	9	cg02204630	232394896	0.000699595	0.0250562	0.0714886	0.0511055	0.0541434	0.0173452	0.0279249	0.018242	0.0172112	0
chr11:2290104-2292932*S_Shore	11	chr11:2290104-2292932	S_Shore	ASCL2	4.31603e-05	0.000878313	18	15	cg12499235	2293173	4.44478e-05	0.00292464	0.778044	0.911006	0.894389	-0.116345	0.0937466	0.0683248	0.0558852	0
chr17:72356096-72356327*S_Shore	17	chr17:72356096-72356327	S_Shore	BTBD17	4.32805e-05	0.000880352	4	4	cg11541486	72358055	2.80574e-06	0.000309195	0.400083	0.31482	0.328161	0.0719222	0.0436933	0.0533064	0.0337506	0
chr12:53718632-53719778*S_Shelf	12	chr12:53718632-53719778	S_Shelf	SP7	4.34676e-05	0.000883853	3	3	cg16096531	53722216	8.11497e-06	0.000742059	0.733568	0.698055	0.698183	0.0353852	0.039756	0.0574768	0.034014	0
chr17:78039291-78039547*N_Shore	17	chr17:78039291-78039547	N_Shore	CCDC40	4.40507e-05	0.000895296	4	4	cg06586046	78038103	0.000426441	0.0171053	0.456336	0.414122	0.429448	0.0268873	0.0367179	0.0354472	0.0451978	0
chr21:38362015-38362868*Island	21	chr21:38362015-38362868	Island	HLCS	4.43686e-05	0.000899068	7	7	cg09037712	38362754	5.99108e-05	0.00370809	0.654051	0.735284	0.724923	-0.0708718	0.0421337	0.0559989	0.0418935	0
chr6:30038881-30039477*Island	6	chr6:30038881-30039477	Island	RNF39	4.4425e-05	0.000899068	32	30	cg09093485	30038882	2.69583e-06	0.000298388	0.826418	0.787438	0.776332	0.0500856	0.0272153	0.0462748	0.0285877	0
chr17:38518965-38520264*S_Shore	17	chr17:38518965-38520264	S_Shore	GJD3	4.45259e-05	0.000900591	5	5	cg05347914	38521067	8.09634e-06	0.000740739	0.583279	0.546413	0.565602	0.0176776	0.0217707	0.0393532	0.023022	0
chr12:4918273-4919657*S_Shelf	12	chr12:4918273-4919657	S_Shelf	KCNA6	4.48629e-05	0.000906487	6	6	cg02722637	4922070	4.03963e-06	0.000415787	0.604621	0.492591	0.528426	0.0761952	0.0622062	0.0708594	0.054929	0
chr7:631836-632135*S_Shore	7	chr7:631836-632135	S_Shore	PRKAR1B	4.48688e-05	0.000906487	4	4	cg16439394	632926	2.18669e-06	0.000250425	0.320708	0.365121	0.386117	-0.0654082	0.0411922	0.0721862	0.0407296	0
chr3:50382889-50383310*Island	3	chr3:50382889-50383310	Island	ZMYND10	4.5191e-05	0.000912159	8	8	cg06704605	50382952	5.10627e-06	0.000505779	0.42714	0.382981	0.383355	0.0437849	0.0269651	0.0354508	0.0294681	0
chr11:1784805-1785553*S_Shore	11	chr11:1784805-1785553	S_Shore	CTSD	4.54758e-05	0.000917068	8	8	cg14250138	1785804	5.51674e-06	0.000537969	0.367995	0.275894	0.307365	0.0606304	0.040831	0.0435397	0.0449831	0
chr11:1784805-1785553*S_Shore	11	chr11:1784805-1785553	S_Shore	HCCA2	4.54758e-05	0.000917068	8	8	cg14250138	1785804	5.51674e-06	0.000537969	0.367995	0.275894	0.307365	0.0606304	0.040831	0.0435397	0.0449831	0
chr12:54519768-54520457*S_Shore	12	chr12:54519768-54520457	S_Shore	LOC400043	4.56173e-05	0.000919606	3	3	cg16396919	54521807	2.58428e-06	0.000288215	0.735066	0.68695	0.687458	0.0476075	0.0433573	0.0577848	0.0530653	0
chr16:332514-332760*Island	16	chr16:332514-332760	Island	PDIA2	4.58302e-05	0.000923474	4	4	cg03663874	332515	0.000118358	0.0063566	0.64445	0.591405	0.598014	0.0464359	0.038862	0.0511413	0.0337396	0
chr16:332514-332760*Island	16	chr16:332514-332760	Island	ARHGDIG	4.58302e-05	0.000923474	4	4	cg03663874	332515	0.000118358	0.0063566	0.64445	0.591405	0.598014	0.0464359	0.038862	0.0511413	0.0337396	0
chr6:84140412-84140998*Island	6	chr6:84140412-84140998	Island	ME1	4.60372e-05	0.000926798	8	8	cg24881834	84140997	0.000948455	0.0314683	0.133484	0.158483	0.141579	-0.00809539	0.0380728	0.0306608	0.0357285	0
chr12:132334377-132334786*Island	12	chr12:132334377-132334786	Island	MMP17	4.62135e-05	0.000930028	3	3	cg17129764	132334515	1.95221e-06	0.000230284	0.740519	0.708914	0.705602	0.0349172	0.0224608	0.034046	0.0323507	0
chr5:31193952-31194419*Island	5	chr5:31193952-31194419	Island	CDH6	4.63393e-05	0.000932028	5	5	cg02004845	31194156	0.000811972	0.0280092	0.0774458	0.0838295	0.0781372	-0.00069138	0.0154051	0.0161835	0.0108607	0
chr17:46654053-46654369*N_Shore	17	chr17:46654053-46654369	N_Shore	HOXB4	4.65143e-05	0.000934907	6	6	cg11971423	46653711	4.1057e-05	0.00275503	0.707866	0.614122	0.653655	0.0542103	0.0465173	0.0617226	0.0444869	0
chr19:2235681-2237102*N_Shore	19	chr19:2235681-2237102	N_Shore	PLEKHJ1	4.70055e-05	0.000944242	5	5	cg14066773	2234262	3.00866e-05	0.00215337	0.197625	0.23556	0.241566	-0.0439405	0.0311765	0.027758	0.0275154	0
chr19:2235681-2237102*N_Shore	19	chr19:2235681-2237102	N_Shore	MIR1227	4.70055e-05	0.000944242	5	5	cg14066773	2234262	3.00866e-05	0.00215337	0.197625	0.23556	0.241566	-0.0439405	0.0311765	0.027758	0.0275154	0
chr8:120867785-120868440*S_Shore	8	chr8:120867785-120868440	S_Shore	DSCC1	4.73082e-05	0.000949455	3	3	cg02161761	120868748	1.33886e-05	0.00111074	0.426119	0.391209	0.383475	0.0426439	0.0316968	0.0424488	0.0414319	0
chr3:149374709-149376300*Island	3	chr3:149374709-149376300	Island	WWTR1	4.83436e-05	0.000968691	16	14	cg02056062	149374914	0.000265418	0.0119198	0.301671	0.358302	0.334246	-0.0325758	0.0351141	0.0344022	0.0319438	0
chr17:27224005-27224873*S_Shore	17	chr17:27224005-27224873	S_Shore	DHRS13	4.85543e-05	0.000971644	3	3	cg08810238	27225046	2.16009e-06	0.000248276	0.314813	0.258638	0.28962	0.0251936	0.0302627	0.0406826	0.0330138	0
chr17:27224005-27224873*S_Shore	17	chr17:27224005-27224873	S_Shore	FLOT2	4.85543e-05	0.000971644	3	3	cg08810238	27225046	2.16009e-06	0.000248276	0.314813	0.258638	0.28962	0.0251936	0.0302627	0.0406826	0.0330138	0
chr10:134944511-134944792*Island	10	chr10:134944511-134944792	Island	GPR123	4.85621e-05	0.000971644	3	3	cg04283815	134944512	0.000121172	0.00646435	0.561563	0.516171	0.514244	0.0473182	0.026208	0.0480484	0.0301163	0
chr19:14516726-14517464*Island	19	chr19:14516726-14517464	Island	CD97	4.85626e-05	0.000971644	4	4	cg02994399	14517152	4.09194e-05	0.00274998	0.290046	0.236955	0.249675	0.0403705	0.0461538	0.0327436	0.039593	0
chr17:7199710-7200009*N_Shore	17	chr17:7199710-7200009	N_Shore	YBX2	4.86196e-05	0.000972232	5	5	cg25555460	7199204	7.48965e-06	0.00069454	0.656963	0.601662	0.577842	0.0791208	0.0358802	0.0494521	0.0448777	0
chr6:27833120-27833406*N_Shore	6	chr6:27833120-27833406	N_Shore	HIST1H2AL	4.89861e-05	0.000978596	11	8	cg01171339	27831894	9.56858e-06	0.000847281	0.753494	0.640955	0.658859	0.0946346	0.0623392	0.0913361	0.0629879	0
chr7:48019088-48019389*N_Shore	7	chr7:48019088-48019389	N_Shore	HUS1	4.8999e-05	0.000978596	3	3	cg10190813	48018530	4.29188e-05	0.00284773	0.141613	0.100832	0.121304	0.0203092	0.0268375	0.0209891	0.0194488	0
chr7:157448240-157448566*Island	7	chr7:157448240-157448566	Island	PTPRN2	4.92168e-05	0.000982613	3	3	cg09434085	157448419	8.8833e-05	0.00507074	0.795888	0.767375	0.765554	0.0303337	0.0329727	0.0423323	0.0312444	0
chr12:122235106-122235310*Island	12	chr12:122235106-122235310	Island	LOC338799	4.92735e-05	0.00098341	3	3	cg09148852	122235169	0.000131272	0.00686804	0.654733	0.633194	0.625959	0.0287742	0.0245522	0.0414843	0.0258403	0
chr19:58861341-58862406*Island	19	chr19:58861341-58862406	Island	A1BG	4.9394e-05	0.000984547	6	6	cg14222245	58861502	4.14645e-05	0.00277181	0.709913	0.649132	0.585351	0.124562	0.0486216	0.0947069	0.0718737	0
chr3:45635090-45635932*S_Shore	3	chr3:45635090-45635932	S_Shore	LIMD1	4.94031e-05	0.000984547	7	7	cg06374185	45637480	4.33679e-06	0.000439948	0.66925	0.612192	0.630173	0.0390767	0.0293388	0.0440873	0.0296208	0
chr10:102896342-102896665*N_Shore	10	chr10:102896342-102896665	N_Shore	TLX1	4.95222e-05	0.000986586	3	3	cg20572816	102896102	1.27631e-05	0.00106841	0.198411	0.143609	0.14761	0.0508012	0.0379846	0.0241088	0.029177	0
chr17:47754870-47755772*Island	17	chr17:47754870-47755772	Island	SPOP	4.95563e-05	0.000986708	5	5	cg16054451	47755353	0.000237442	0.0109357	0.00689887	0.00522995	0.00444565	0.00245322	0.00818853	0.00667333	0.00533571	0
chr5:442820-443604*S_Shore	5	chr5:442820-443604	S_Shore	C5orf55	4.96149e-05	0.000987428	4	4	cg21151960	444080	0.000171324	0.00844453	0.77158	0.727451	0.714679	0.0569011	0.034846	0.0708803	0.0368897	0
chr5:442820-443604*S_Shore	5	chr5:442820-443604	S_Shore	EXOC3	4.96149e-05	0.000987428	4	4	cg21151960	444080	0.000171324	0.00844453	0.77158	0.727451	0.714679	0.0569011	0.034846	0.0708803	0.0368897	0
chr21:47808671-47809121*Island	21	chr21:47808671-47809121	Island	PCNT	4.97505e-05	0.00098968	4	4	cg00849853	47808878	2.05435e-05	0.0015746	0.819659	0.842252	0.843564	-0.0239056	0.0200457	0.0152018	0.0213905	0
chr11:73018452-73020563*S_Shore	11	chr11:73018452-73020563	S_Shore	ARHGEF17	5.04009e-05	0.00100217	4	4	cg03958883	73020729	4.99741e-05	0.00320918	0.528372	0.46864	0.472734	0.0556372	0.0324153	0.0423716	0.0526814	0
chr17:1839989-1841209*Island	17	chr17:1839989-1841209	Island	RTN4RL1	5.09815e-05	0.00101325	4	4	cg05861697	1839990	0.000152834	0.00772772	0.52773	0.622851	0.616538	-0.0888073	0.0625282	0.0828109	0.0524776	0
chr7:150754922-150755426*N_Shore	7	chr7:150754922-150755426	N_Shore	CDK5	5.1263e-05	0.00101735	5	4	cg09679690	150754214	6.62671e-06	0.000628133	0.369566	0.307799	0.326292	0.0432739	0.0358678	0.0546951	0.0337877	0
chr11:67275067-67276431*Island	11	chr11:67275067-67276431	Island	CDK2AP2	5.12684e-05	0.00101735	11	10	cg02430138	67275245	4.04353e-05	0.00272264	0.0836191	0.052158	0.05858	0.0250391	0.0149017	0.013237	0.0148041	0
chr13:39261236-39262299*Island	13	chr13:39261236-39262299	Island	FREM2	5.16234e-05	0.00102359	7	7	cg12844784	39261734	5.19686e-05	0.00331072	0.0923934	0.112071	0.0951775	-0.00278411	0.0243517	0.016711	0.0167278	0
chr1:55352463-55353328*N_Shore	1	chr1:55352463-55353328	N_Shore	DHCR24	5.17539e-05	0.00102583	3	3	cg27168858	55351659	6.01447e-06	0.000580085	0.701401	0.761787	0.773063	-0.0716619	0.0571785	0.0569569	0.0358702	0
chr17:29151481-29151901*S_Shore	17	chr17:29151481-29151901	S_Shore	CRLF3	5.18395e-05	0.00102718	3	3	cg05388545	29152968	6.04835e-06	0.000582715	0.428891	0.401558	0.422341	0.00654995	0.0383136	0.0456584	0.0446089	0
chr4:619513-619912*N_Shore	4	chr4:619513-619912	N_Shore	PDE6B	5.20571e-05	0.00103021	12	11	cg23605991	618114	2.1121e-06	0.000243571	0.443888	0.343211	0.343652	0.100237	0.0472612	0.0564473	0.0345951	0
chr22:43547319-43548169*N_Shore	22	chr22:43547319-43548169	N_Shore	TSPO	5.20856e-05	0.00103043	3	3	cg13160331	43547217	2.84214e-06	0.000312815	0.24788	0.210056	0.218213	0.0296674	0.0325868	0.0356716	0.0280628	0
chr13:38443682-38444228*Island	13	chr13:38443682-38444228	Island	TRPC4	5.23703e-05	0.00103434	8	8	cg15696906	38444134	5.29459e-05	0.00336204	0.228766	0.27849	0.22939	-0.000623855	0.076476	0.0482313	0.0481108	0
chr3:183959061-183959747*Island	3	chr3:183959061-183959747	Island	VWA5B2	5.23712e-05	0.00103434	8	7	cg16625004	183959550	1.41755e-05	0.00116451	0.445156	0.400847	0.378774	0.0663824	0.0353632	0.046107	0.0229921	0
chr1:159894329-159895398*S_Shore	1	chr1:159894329-159895398	S_Shore	TAGLN2	5.25715e-05	0.00103771	5	5	cg21571466	159895591	0.00149943	0.0439554	0.0947342	0.0793216	0.0793351	0.0153991	0.016252	0.0154574	0.0136186	0
chr10:135016379-135017476*N_Shore	10	chr10:135016379-135017476	N_Shore	KNDC1	5.26169e-05	0.00103826	3	3	cg10217713	135015587	1.38603e-05	0.00114395	0.540298	0.487042	0.519518	0.0207805	0.0409112	0.0414535	0.0311448	0
chr22:33197380-33198267*N_Shore	22	chr22:33197380-33198267	N_Shore	SYN3	5.27835e-05	0.00103992	14	14	cg24080529	33197034	1.96399e-06	0.00023118	0.519091	0.476811	0.499584	0.0195066	0.0320966	0.0414679	0.0297465	0
chr22:33197380-33198267*N_Shore	22	chr22:33197380-33198267	N_Shore	TIMP3	5.27835e-05	0.00103992	14	14	cg24080529	33197034	1.96399e-06	0.00023118	0.519091	0.476811	0.499584	0.0195066	0.0320966	0.0414679	0.0297465	0
chr1:32687521-32688040*Island	1	chr1:32687521-32688040	Island	EIF3I	5.35802e-05	0.00105467	8	8	cg26219182	32687590	2.19555e-06	0.000250911	0.131597	0.103868	0.101069	0.0305283	0.0184859	0.0159921	0.0113214	0
chr1:32687521-32688040*Island	1	chr1:32687521-32688040	Island	C1orf91	5.35802e-05	0.00105467	8	8	cg26219182	32687590	2.19555e-06	0.000250911	0.131597	0.103868	0.101069	0.0305283	0.0184859	0.0159921	0.0113214	0
chr2:206549599-206551316*S_Shore	2	chr2:206549599-206551316	S_Shore	NRP2	5.36321e-05	0.00105522	4	4	cg19795793	206551844	4.56581e-05	0.00298647	0.648695	0.715388	0.716238	-0.067543	0.061496	0.058376	0.0429789	0
chr17:46675044-46675589*S_Shore	17	chr17:46675044-46675589	S_Shore	HOXB6	5.42867e-05	0.00106774	3	3	cg15908709	46676215	1.92945e-06	0.000228181	0.434732	0.284831	0.33186	0.102872	0.0660176	0.0669199	0.0590784	0
chr17:46675044-46675589*S_Shore	17	chr17:46675044-46675589	S_Shore	LOC404266	5.42867e-05	0.00106774	3	3	cg15908709	46676215	1.92945e-06	0.000228181	0.434732	0.284831	0.33186	0.102872	0.0660176	0.0669199	0.0590784	0
chr20:3766343-3767636*Island	20	chr20:3766343-3767636	Island	CENPB	5.44459e-05	0.00107004	7	7	cg22595230	3766560	7.59939e-05	0.00449652	0.841622	0.69086	0.704668	0.136954	0.0713162	0.0881939	0.0852324	0
chr14:105881312-105881747*S_Shelf	14	chr14:105881312-105881747	S_Shelf	MTA1	5.49702e-05	0.00107986	4	4	cg21517792	105885531	5.21455e-06	0.000514192	0.886113	0.849114	0.856661	0.0294515	0.0141448	0.0290136	0.0235378	0
chr10:135121991-135122669*N_Shore	10	chr10:135121991-135122669	N_Shore	ZNF511	5.50846e-05	0.00108114	8	8	cg17770886	135121331	9.63298e-06	0.000850846	0.10134	0.126566	0.118396	-0.0170558	0.0134821	0.0212626	0.0127915	0
chr10:135121991-135122669*N_Shore	10	chr10:135121991-135122669	N_Shore	TUBGCP2	5.50846e-05	0.00108114	8	8	cg17770886	135121331	9.63298e-06	0.000850846	0.10134	0.126566	0.118396	-0.0170558	0.0134821	0.0212626	0.0127915	0
chr19:15344091-15344419*Island	19	chr19:15344091-15344419	Island	EPHX3	5.5325e-05	0.0010855	3	3	cg21595709	15344186	4.76756e-06	0.000476786	0.130939	0.162142	0.137847	-0.00690747	0.0336943	0.0212861	0.0194302	0
chr5:68788151-68789823*N_Shore	5	chr5:68788151-68789823	N_Shore	OCLN	5.5602e-05	0.00108996	8	8	cg17772163	68787760	2.89167e-05	0.00208659	0.801385	0.861539	0.864021	-0.0626355	0.0459313	0.0511546	0.0257053	0
chr20:44685771-44687610*Island	20	chr20:44685771-44687610	Island	SLC12A5	5.58997e-05	0.00109543	4	3	cg07060233	44687092	9.26026e-06	0.000824954	0.137636	0.164294	0.142729	-0.0050928	0.0365858	0.0251974	0.0287706	0
chr6:29595298-29595795*N_Shelf	6	chr6:29595298-29595795	N_Shelf	GABBR1	5.62064e-05	0.00110018	5	3	cg11834473	29591753	3.55397e-06	0.000373434	0.412451	0.321805	0.350639	0.0618115	0.0378383	0.0444715	0.0486672	0
chr1:113498366-113499312*Island	1	chr1:113498366-113499312	Island	SLC16A1	5.62168e-05	0.00110018	9	9	cg16163697	113498742	3.18541e-05	0.00225062	0.0393317	0.0247456	0.0177886	0.0215431	0.0150415	0.0137504	0.0123518	0
chr6:111580363-111580887*N_Shore	6	chr6:111580363-111580887	N_Shore	KIAA1919	5.6401e-05	0.00110329	4	4	cg15219685	111580120	2.45461e-06	0.000276024	0.198417	0.134846	0.167083	0.0313337	0.0345185	0.0327147	0.0288552	0
chr9:139654897-139655154*N_Shelf	9	chr9:139654897-139655154	N_Shelf	LCN8	5.71063e-05	0.00111657	3	3	cg06617876	139652874	4.31779e-06	0.000438525	0.405869	0.360903	0.385986	0.0198829	0.0324825	0.0292531	0.0201349	0
chr6:56407464-56407926*Island	6	chr6:56407464-56407926	Island	DST	5.71179e-05	0.00111657	3	3	cg15673187	56407725	0.00157562	0.0454627	0.00911552	0.00832992	0.0065319	0.00258362	0.00563396	0.00404935	0.00457377	0
chr17:74553220-74553912*S_Shelf	17	chr17:74553220-74553912	S_Shelf	SNORD1A	5.72198e-05	0.00111807	5	4	cg05727573	74557104	0.000146184	0.00745133	0.434499	0.420756	0.43176	0.00273902	0.0286822	0.0353193	0.0285146	0
chr17:74553220-74553912*S_Shelf	17	chr17:74553220-74553912	S_Shelf	SNORD1B	5.72198e-05	0.00111807	5	4	cg05727573	74557104	0.000146184	0.00745133	0.434499	0.420756	0.43176	0.00273902	0.0286822	0.0353193	0.0285146	0
chr22:24819537-24820810*S_Shelf	22	chr22:24819537-24820810	S_Shelf	ADORA2A	5.76634e-05	0.00112534	11	10	cg04990420	24824362	2.06355e-05	0.00158096	0.386475	0.419118	0.418093	-0.0316176	0.0318003	0.0400221	0.0293776	0
chr6:32847498-32847846*Island	6	chr6:32847498-32847846	Island	PPP1R2P1	5.77578e-05	0.00112534	20	16	cg00797104	32847605	7.72201e-06	0.000711664	0.610775	0.591318	0.564548	0.0462269	0.0364076	0.0696616	0.0444052	0
chr6:53659254-53660972*Island	6	chr6:53659254-53660972	Island	LRRC1	5.80462e-05	0.00113008	8	7	cg01881322	53660854	8.8238e-05	0.00504842	0.10632	0.116191	0.0996618	0.00665792	0.0339078	0.0220972	0.019108	0
chr19:3189821-3190043*N_Shore	19	chr19:3189821-3190043	N_Shore	NCLN	5.82369e-05	0.00113342	3	3	cg12131620	3188985	0.001536	0.0446856	0.116804	0.139976	0.141007	-0.0242026	0.026218	0.0240403	0.0297902	0
chr2:198029068-198029438*Island	2	chr2:198029068-198029438	Island	ANKRD44	5.82789e-05	0.00113386	3	3	cg26132737	198029141	1.89749e-06	0.000224855	0.584913	0.679797	0.696063	-0.111149	0.0671311	0.106113	0.0589818	0
chr5:500388-500612*S_Shore	5	chr5:500388-500612	S_Shore	SLC9A3	5.86953e-05	0.00114159	3	3	cg22025206	502436	0.113695	0.601804	0.392234	0.368705	0.367996	0.0242382	0.111285	0.11969	0.0794044	0
chr11:2828445-2828884*Island	11	chr11:2828445-2828884	Island	KCNQ1	5.90862e-05	0.00114868	4	4	cg07979757	2828652	3.00861e-06	0.000326247	0.932999	0.871696	0.860569	0.0724306	0.0265803	0.0567047	0.0395419	0
chr11:791953-792400*N_Shore	11	chr11:791953-792400	N_Shore	SLC25A22	5.93223e-05	0.00115213	9	9	cg09336922	790795	8.057e-05	0.00470421	0.80681	0.776513	0.785776	0.0210345	0.0250716	0.0361714	0.0224147	0
chr11:791953-792400*N_Shore	11	chr11:791953-792400	N_Shore	CEND1	5.93223e-05	0.00115213	9	9	cg09336922	790795	8.057e-05	0.00470421	0.80681	0.776513	0.785776	0.0210345	0.0250716	0.0361714	0.0224147	0
chr12:49212162-49212642*N_Shore	12	chr12:49212162-49212642	N_Shore	CACNB3	5.96861e-05	0.00115868	4	4	cg04152629	49211867	3.55248e-05	0.00246451	0.0717237	0.033398	0.0379523	0.0337714	0.0243381	0.0106397	0.0118738	0
chr6:109776194-109777645*Island	6	chr6:109776194-109777645	Island	MICAL1	6.00021e-05	0.00116341	11	11	cg13206063	109777592	3.00847e-06	0.000326247	0.537858	0.561702	0.591324	-0.0534654	0.0394246	0.0388966	0.0394476	0
chr14:104621866-104622149*Island	14	chr14:104621866-104622149	Island	KIF26A	6.07623e-05	0.00117682	3	3	cg14058100	104622028	0.000830395	0.0284789	0.872838	0.908372	0.901086	-0.0282483	0.0485638	0.0569248	0.0456233	0
chr9:35657752-35658777*N_Shore	9	chr9:35657752-35658777	N_Shore	CCDC107	6.08337e-05	0.00117682	4	4	cg11326613	35657478	4.20997e-05	0.00280682	0.147179	0.124794	0.119485	0.0276939	0.0216259	0.0161903	0.0160062	0
chr17:32484007-32484280*N_Shore	17	chr17:32484007-32484280	N_Shore	ACCN1	6.08477e-05	0.00117682	8	8	cg09152943	32483882	0.000330858	0.014155	0.130288	0.115616	0.112547	0.0177402	0.0223021	0.0188425	0.0187124	0
chr1:45278765-45279644*N_Shelf	1	chr1:45278765-45279644	N_Shelf	BTBD19	6.08611e-05	0.00117682	3	3	cg17093466	45276537	3.0647e-06	0.000330141	0.491711	0.4349	0.460669	0.0310424	0.0358284	0.0458497	0.0294328	0
chr2:36824792-36825305*N_Shore	2	chr2:36824792-36825305	N_Shore	FEZ2	6.18263e-05	0.00119496	4	4	cg01109574	36824259	3.61568e-06	0.000378338	0.805195	0.707951	0.700258	0.104937	0.0658833	0.104429	0.0651757	0
chr17:79994780-79995664*Island	17	chr17:79994780-79995664	Island	DCXR	6.22356e-05	0.00120208	6	6	cg07073120	79994884	7.48328e-06	0.00069454	0.157075	0.108509	0.121304	0.0357706	0.0236374	0.018367	0.0167319	0
chr1:35657467-35658811*S_Shore	1	chr1:35657467-35658811	S_Shore	SFPQ	6.27035e-05	0.00121032	7	6	cg01938422	35659480	2.23932e-05	0.00168991	0.714088	0.602673	0.601187	0.1129	0.0530052	0.0785397	0.0779324	0
chr14:91282227-91282757*N_Shore	14	chr14:91282227-91282757	N_Shore	TTC7B	6.27669e-05	0.00121115	3	3	cg06937409	91281948	2.37341e-05	0.00176913	0.5798	0.520535	0.539573	0.0402271	0.0300468	0.0279862	0.02929	0
chr17:46654053-46654369*N_Shelf	17	chr17:46654053-46654369	N_Shelf	HOXB3	6.35099e-05	0.00122455	11	7	cg06395298	46651225	0.000133625	0.00696221	0.761211	0.633444	0.65655	0.104661	0.0732752	0.0858365	0.0694201	0
chr16:89167116-89167482*S_Shore	16	chr16:89167116-89167482	S_Shore	ACSF3	6.35495e-05	0.00122464	5	5	cg04069539	89168963	0.0029007	0.0700186	0.469044	0.536673	0.537709	-0.0686649	0.0485676	0.0587104	0.0590182	0
chr11:128562671-128565011*S_Shore	11	chr11:128562671-128565011	S_Shore	FLI1	6.37745e-05	0.00122831	5	5	cg21585162	128566387	4.82999e-06	0.00048139	0.283698	0.226517	0.23801	0.0456877	0.0487745	0.0425014	0.0355198	0
chr2:85811340-85811855*N_Shore	2	chr2:85811340-85811855	N_Shore	VAMP5	6.44252e-05	0.00124043	3	3	cg02652597	85811292	6.77827e-06	0.000638037	0.210794	0.148247	0.151011	0.0597824	0.0354957	0.0266842	0.0156096	0
chr12:56617995-56618374*N_Shore	12	chr12:56617995-56618374	N_Shore	OBFC2B	6.45333e-05	0.00124143	8	8	cg08409225	56617737	6.57975e-06	0.000625026	0.542784	0.461503	0.458013	0.0847705	0.0441928	0.0470657	0.0409928	0
chr7:1024021-1024233*N_Shore	7	chr7:1024021-1024233	N_Shore	CYP2W1	6.47013e-05	0.00124344	12	9	cg09414673	1022797	8.18371e-05	0.00477029	0.936441	0.851199	0.874407	0.0620342	0.0348575	0.0571856	0.0614465	0
chr12:41086522-41087102*N_Shore	12	chr12:41086522-41087102	N_Shore	CNTN1	6.495e-05	0.00124686	11	10	cg09143195	41085901	2.95075e-06	0.000321953	0.310392	0.136206	0.204214	0.106178	0.0774172	0.0345619	0.0650094	0
chr6:29595298-29595795*S_Shore	6	chr6:29595298-29595795	S_Shore	GABBR1	6.50776e-05	0.00124808	9	9	cg04335343	29597113	6.65144e-06	0.000629461	0.717853	0.674243	0.680393	0.0374602	0.0222267	0.0565077	0.0215315	0
chr3:32433104-32434162*N_Shore	3	chr3:32433104-32434162	N_Shore	CMTM7	6.51657e-05	0.00124896	6	6	cg10101634	32432642	7.49284e-06	0.00069454	0.276908	0.309231	0.330342	-0.0534343	0.0367198	0.0462255	0.03503	0
chr7:6198495-6198731*S_Shore	7	chr7:6198495-6198731	S_Shore	USP42	6.53324e-05	0.00125134	6	6	cg18419175	6199980	0.000407216	0.0165108	0.892183	0.844856	0.849127	0.0430557	0.0267823	0.0586604	0.033512	0
chr9:32572996-32573227*S_Shore	9	chr9:32572996-32573227	S_Shore	NDUFB6	6.56971e-05	0.00125791	3	3	cg14472148	32573691	4.66018e-05	0.00302905	0.795984	0.748763	0.762513	0.0334706	0.0340036	0.0467556	0.0292371	0
chr11:67139887-67141146*S_Shore	11	chr11:67139887-67141146	S_Shore	LOC100130987	6.58624e-05	0.00125943	13	12	cg08531140	67143062	2.18712e-05	0.00165832	0.689792	0.748352	0.756133	-0.0663408	0.0339164	0.0464395	0.0255648	0
chr11:67139887-67141146*S_Shore	11	chr11:67139887-67141146	S_Shore	CLCF1	6.58624e-05	0.00125943	13	12	cg08531140	67143062	2.18712e-05	0.00165832	0.689792	0.748352	0.756133	-0.0663408	0.0339164	0.0464395	0.0255648	0
chr1:180881316-180882592*N_Shore	1	chr1:180881316-180882592	N_Shore	KIAA1614	6.5917e-05	0.00126007	3	3	cg01022200	180881086	1.65193e-05	0.00132112	0.21252	0.210026	0.220935	-0.0084146	0.0478596	0.0323788	0.0390108	0
chr6:31830299-31830948*S_Shore	6	chr6:31830299-31830948	S_Shore	SLC44A4	6.6146e-05	0.00126013	30	29	cg14378924	31832529	7.98021e-05	0.00467176	0.558608	0.509928	0.529936	0.028672	0.0359678	0.0381618	0.0333629	0
chr9:136150031-136151365*Island	9	chr9:136150031-136151365	Island	ABO	6.61562e-05	0.00126013	4	4	cg22535403	136150032	0.000227367	0.0105879	0.522427	0.393289	0.394149	0.128278	0.0989367	0.105844	0.0803398	0
chr1:114354373-114355300*S_Shore	1	chr1:114354373-114355300	S_Shore	RSBN1	6.70094e-05	0.00127597	3	3	cg03469607	114355571	3.76545e-06	0.00039238	0.456885	0.512202	0.492464	-0.0355797	0.0343471	0.0381825	0.0433355	0
chr15:75248277-75249922*Island	15	chr15:75248277-75249922	Island	RPP25	6.71466e-05	0.00127706	11	11	cg15611336	75248496	7.09857e-06	0.000664259	0.401962	0.320912	0.293018	0.108944	0.0440932	0.0512403	0.0418777	0
chr2:223288922-223290013*N_Shore	2	chr2:223288922-223290013	N_Shore	SGPP2	6.73782e-05	0.00128105	4	3	cg11300809	223288637	4.94223e-06	0.000491188	0.308113	0.368478	0.367319	-0.0592062	0.0343386	0.0721725	0.0466573	0
chr7:766085-766952*S_Shore	7	chr7:766085-766952	S_Shore	PRKAR1B	6.75734e-05	0.00128293	6	6	cg10396616	768364	0.00120092	0.0375131	0.896816	0.903143	0.906226	-0.00941046	0.0165299	0.0174814	0.0142381	0
chr7:766085-766952*S_Shore	7	chr7:766085-766952	S_Shore	HEATR2	6.75734e-05	0.00128293	6	6	cg10396616	768364	0.00120092	0.0375131	0.896816	0.903143	0.906226	-0.00941046	0.0165299	0.0174814	0.0142381	0
chr15:44580804-44581543*N_Shore	15	chr15:44580804-44581543	N_Shore	CASC4	6.76063e-05	0.00128293	5	5	cg00093643	44579510	5.28577e-05	0.00335765	0.440599	0.356456	0.367263	0.0733355	0.0549581	0.0546356	0.0521975	0
chr5:78280317-78281300*S_Shore	5	chr5:78280317-78281300	S_Shore	ARSB	6.76152e-05	0.00128293	8	8	cg24893837	78282099	0.000823567	0.0283164	0.741398	0.693212	0.701539	0.0398582	0.0289485	0.0579649	0.054868	0
chr7:128577818-128578756*S_Shore	7	chr7:128577818-128578756	S_Shore	IRF5	6.79422e-05	0.00128738	5	5	cg04864179	128579964	1.70427e-05	0.00135336	0.389015	0.40937	0.439848	-0.0508328	0.0361016	0.0430218	0.0366671	0
chr19:39616277-39616819*Island	19	chr19:39616277-39616819	Island	PAK4	6.79447e-05	0.00128738	8	8	cg12406027	39616818	2.63373e-06	0.000292802	0.298386	0.234704	0.245172	0.0532137	0.0328009	0.0374769	0.0290128	0
chr11:804827-805608*N_Shore	11	chr11:804827-805608	N_Shore	LRDD	6.83903e-05	0.00129512	5	5	cg24660199	802935	1.08645e-05	0.000939787	0.670404	0.646284	0.650287	0.0201173	0.0204781	0.0324623	0.0299244	0
chr11:77184193-77185504*Island	11	chr11:77184193-77185504	Island	PAK1	6.92457e-05	0.00131034	7	7	cg15140465	77184194	2.60692e-06	0.000290372	0.25989	0.172466	0.190012	0.0698774	0.0448151	0.02709	0.0321671	0
chr11:65479349-65480024*N_Shore	11	chr11:65479349-65480024	N_Shore	KAT5	6.95046e-05	0.00131467	4	4	cg22114498	65478893	1.16306e-05	0.000991982	0.200981	0.160508	0.144589	0.056392	0.0343852	0.0521944	0.0283359	0
chr17:80397431-80397642*S_Shore	17	chr17:80397431-80397642	S_Shore	HEXDC	7.00362e-05	0.00132416	4	4	cg06085905	80398117	0.00115906	0.036527	0.805978	0.798107	0.782665	0.023313	0.0204946	0.031774	0.0276423	0
chr11:45671197-45672412*Island	11	chr11:45671197-45672412	Island	CHST1	7.05329e-05	0.00133238	3	3	cg01425746	45671369	1.82358e-05	0.00143178	0.804783	0.682148	0.661585	0.143198	0.0442775	0.136309	0.0872401	0
chr7:73498098-73498697*N_Shore	7	chr7:73498098-73498697	N_Shore	LIMK1	7.05392e-05	0.00133238	6	6	cg06757357	73497746	6.68609e-06	0.000631701	0.135993	0.107578	0.110262	0.0257316	0.0217622	0.0149856	0.0150397	0
chr19:7745490-7747714*Island	19	chr19:7745490-7747714	Island	TRAPPC5	7.07489e-05	0.00133477	11	11	cg24699296	7747220	0.000145515	0.0074258	0.911987	0.851091	0.827167	0.0848194	0.0334903	0.0707714	0.0518631	0
chr15:89920793-89922768*Island	15	chr15:89920793-89922768	Island	LOC254559	7.14279e-05	0.00134507	17	15	cg09169617	89921672	1.61496e-05	0.00129824	0.192413	0.222707	0.203822	-0.0114093	0.0305895	0.0263324	0.0275654	0
chr14:91282227-91282757*S_Shore	14	chr14:91282227-91282757	S_Shore	TTC7B	7.14402e-05	0.00134507	4	4	cg21049809	91283462	8.3383e-06	0.000756981	0.521796	0.480576	0.506363	0.0154321	0.027938	0.041218	0.0212537	0
chr6:83902606-83903777*S_Shore	6	chr6:83902606-83903777	S_Shore	RWDD2A	7.17738e-05	0.00135049	6	6	cg19119071	83904067	0.000784817	0.027374	0.254642	0.206799	0.204849	0.0497936	0.0492772	0.0318899	0.0375136	0
chr6:83902606-83903777*S_Shore	6	chr6:83902606-83903777	S_Shore	PGM3	7.17738e-05	0.00135049	6	6	cg19119071	83904067	0.000784817	0.027374	0.254642	0.206799	0.204849	0.0497936	0.0492772	0.0318899	0.0375136	0
chr3:32147826-32148874*Island	3	chr3:32147826-32148874	Island	GPD1L	7.22884e-05	0.00135887	10	9	cg19143336	32148863	4.01265e-06	0.000413735	0.597243	0.5133	0.507654	0.0895889	0.0396222	0.05759	0.0386283	0
chr8:28243684-28244283*S_Shore	8	chr8:28243684-28244283	S_Shore	ZNF395	7.23303e-05	0.00135922	3	3	cg08606497	28244769	7.76371e-06	0.000715134	0.449368	0.391538	0.421437	0.0279308	0.0381231	0.0377921	0.0447477	0
chr21:32624144-32624382*Island	21	chr21:32624144-32624382	Island	TIAM1	7.26071e-05	0.00136384	4	4	cg24252343	32624157	2.97796e-05	0.00213573	0.814873	0.840461	0.840693	-0.0258201	0.0175071	0.018126	0.0210621	0
chr17:46507344-46507778*S_Shore	17	chr17:46507344-46507778	S_Shore	SKAP1	7.27316e-05	0.00136531	4	4	cg02957270	46508097	3.18324e-05	0.00224999	0.714728	0.643483	0.663827	0.0509017	0.0405398	0.0783724	0.0543353	0
chr1:115397448-115397942*N_Shore	1	chr1:115397448-115397942	N_Shore	SYCP1	7.27705e-05	0.00136531	7	7	cg07832006	115397374	1.22427e-05	0.00103369	0.799869	0.765771	0.745351	0.0545187	0.0442484	0.14098	0.0446965	0
chr10:134360859-134361084*S_Shore	10	chr10:134360859-134361084	S_Shore	INPP5A	7.35051e-05	0.00137777	9	9	cg17270821	134362758	5.12741e-05	0.00327813	0.808516	0.763706	0.785458	0.0230577	0.0461332	0.0396678	0.0345092	0
chr6:31864897-31865419*N_Shore	6	chr6:31864897-31865419	N_Shore	EHMT2	7.36285e-05	0.00137847	12	11	cg22810281	31863252	9.4632e-05	0.00533435	0.716988	0.7642	0.764467	-0.0474788	0.0345071	0.0237284	0.0275924	0
chr1:53308294-53309262*N_Shore	1	chr1:53308294-53309262	N_Shore	ZYG11A	7.42176e-05	0.00138876	5	5	cg12803004	53306727	2.61967e-06	0.000291607	0.53302	0.597541	0.612696	-0.0796759	0.0545848	0.0459268	0.0526137	0
chr17:7452150-7452645*Island	17	chr17:7452150-7452645	Island	TNFSF12-TNFSF13	7.44627e-05	0.00139261	5	5	cg17892169	7452644	3.01882e-05	0.00215714	0.358933	0.283104	0.29806	0.0608728	0.0513264	0.0411744	0.0455062	0
chr17:7452150-7452645*Island	17	chr17:7452150-7452645	Island	TNFSF12	7.44627e-05	0.00139261	5	5	cg17892169	7452644	3.01882e-05	0.00215714	0.358933	0.283104	0.29806	0.0608728	0.0513264	0.0411744	0.0455062	0
chr3:136580875-136581721*N_Shore	3	chr3:136580875-136581721	N_Shore	NCK1	7.4531e-05	0.00139344	3	3	cg00658740	136579741	3.04774e-06	0.000329193	0.408674	0.346792	0.380429	0.0282449	0.0394504	0.0496254	0.0360083	0
chr14:61188116-61190772*S_Shore	14	chr14:61188116-61190772	S_Shore	SIX4	7.50531e-05	0.00140231	7	6	cg09970023	61191253	4.37327e-06	0.000443139	0.427771	0.468673	0.501776	-0.0740049	0.048599	0.0651738	0.0492301	0
chr10:52750956-52751765*N_Shore	10	chr10:52750956-52751765	N_Shore	PRKG1	7.52142e-05	0.00140448	5	4	cg04004590	52750296	6.37171e-05	0.00390663	0.443814	0.396864	0.377702	0.0661121	0.0520465	0.0758751	0.0239898	0
chr3:42695528-42696575*N_Shore	3	chr3:42695528-42696575	N_Shore	ZBTB47	7.52412e-05	0.00140448	5	5	cg22304662	42694783	3.82481e-05	0.00260322	0.726518	0.753452	0.765455	-0.0389366	0.0276083	0.0331296	0.0267902	0
chr4:3516456-3516844*Island	4	chr4:3516456-3516844	Island	LRPAP1	7.54675e-05	0.00140811	4	4	cg26401028	3516534	3.82827e-06	0.000397984	0.717607	0.861287	0.834812	-0.117205	0.0744666	0.0771347	0.0543336	0
chr16:3067521-3068358*Island	16	chr16:3067521-3068358	Island	CLDN6	7.55898e-05	0.00140886	8	8	cg07384961	3068128	0.000589012	0.0219848	0.173517	0.155586	0.15327	0.0202467	0.0261825	0.0215936	0.019996	0
chr20:62612300-62612787*N_Shore	20	chr20:62612300-62612787	N_Shore	PRPF6	7.57663e-05	0.00140886	4	4	cg03224418	62611858	1.49991e-05	0.00122249	0.414984	0.350963	0.37962	0.0353636	0.0375733	0.046212	0.0356444	0
chr20:62612300-62612787*N_Shore	20	chr20:62612300-62612787	N_Shore	SAMD10	7.57663e-05	0.00140886	4	4	cg03224418	62611858	1.49991e-05	0.00122249	0.414984	0.350963	0.37962	0.0353636	0.0375733	0.046212	0.0356444	0
chr17:7311672-7312063*Island	17	chr17:7311672-7312063	Island	NLGN2	7.58345e-05	0.00140886	4	4	cg09568217	7311868	0.000217724	0.0102199	0.686272	0.653479	0.618042	0.0682301	0.0492417	0.0583355	0.0463308	0
chr11:3186131-3186768*S_Shore	11	chr11:3186131-3186768	S_Shore	OSBPL5	7.58596e-05	0.00140886	30	28	cg07284339	3186823	0.000204104	0.00970202	0.167948	0.143042	0.145092	0.0228563	0.0306883	0.0360824	0.028693	0
chr12:56546192-56546411*N_Shore	12	chr12:56546192-56546411	N_Shore	MYL6B	7.6003e-05	0.00141022	6	6	cg22958248	56545428	0.0160753	0.219203	0.523989	0.508333	0.499689	0.0243005	0.038513	0.0476765	0.041174	0
chr20:62509163-62509369*Island	20	chr20:62509163-62509369	Island	TPD52L2	7.67773e-05	0.00141987	3	3	cg15108699	62509164	6.70484e-06	0.000632138	0.724743	0.763429	0.794092	-0.0693494	0.0451277	0.0595086	0.0366154	0
chr20:36148603-36150136*Island	20	chr20:36148603-36150136	Island	BLCAP	7.69392e-05	0.00141987	37	30	cg26083330	36148615	9.04875e-05	0.00515016	0.651792	0.709525	0.713677	-0.0618849	0.0537387	0.0669564	0.0426789	0
chr20:36148603-36150136*Island	20	chr20:36148603-36150136	Island	NNAT	7.69392e-05	0.00141987	37	30	cg26083330	36148615	9.04875e-05	0.00515016	0.651792	0.709525	0.713677	-0.0618849	0.0537387	0.0669564	0.0426789	0
chr11:75236189-75237781*Island	11	chr11:75236189-75237781	Island	GDPD5	7.69678e-05	0.00141987	12	12	cg16393207	75237739	6.80962e-05	0.00411358	0.770305	0.708799	0.717348	0.0529565	0.0318419	0.0593142	0.0295207	0
chr19:38810376-38810949*N_Shore	19	chr19:38810376-38810949	N_Shore	KCNK6	7.72773e-05	0.00142444	5	5	cg20958753	38810162	1.79461e-05	0.00141237	0.418215	0.367555	0.364492	0.0537232	0.0376239	0.0405146	0.0286088	0
chr10:711896-712395*N_Shore	10	chr10:711896-712395	N_Shore	C10orf108	7.72802e-05	0.00142444	4	3	cg13660126	709898	3.06494e-06	0.000330141	0.731388	0.81066	0.813709	-0.0823208	0.0382914	0.0311453	0.0300616	0
chr10:711896-712395*N_Shore	10	chr10:711896-712395	N_Shore	DIP2C	7.72802e-05	0.00142444	4	3	cg13660126	709898	3.06494e-06	0.000330141	0.731388	0.81066	0.813709	-0.0823208	0.0382914	0.0311453	0.0300616	0
chr1:121260857-121261525*N_Shore	1	chr1:121260857-121261525	N_Shore	LOC647121	7.73261e-05	0.00142454	5	5	cg03391657	121260690	5.51588e-05	0.00347618	0.53534	0.575202	0.573873	-0.0385335	0.0395934	0.0565387	0.0354817	0
chr22:17090455-17091224*Island	22	chr22:17090455-17091224	Island	psiTPTE22	7.7521e-05	0.0014272	4	4	cg20009101	17091223	4.76217e-06	0.000476517	0.0821136	0.104294	0.0956329	-0.0135193	0.0259406	0.0166451	0.0162582	0
chr6:31707489-31708336*N_Shore	6	chr6:31707489-31708336	N_Shore	MSH5	7.75676e-05	0.0014272	8	8	cg20640261	31707019	8.03026e-06	0.000735457	0.423468	0.369757	0.4063	0.0171678	0.0360336	0.0520326	0.047669	0
chr3:186078710-186080111*S_Shore	3	chr3:186078710-186080111	S_Shore	DGKG	7.76327e-05	0.0014275	6	6	cg00434119	186080868	0.000177862	0.00869867	0.587407	0.564827	0.573126	0.014281	0.0393258	0.0512225	0.0489145	0
chr17:37321482-37322099*S_Shore	17	chr17:37321482-37322099	S_Shore	ARL5C	7.77038e-05	0.00142776	7	7	cg12658374	37323563	2.87157e-05	0.00207463	0.509836	0.523374	0.548572	-0.0387367	0.0410669	0.0378811	0.0409703	0
chr14:75422068-75422507*S_Shore	14	chr14:75422068-75422507	S_Shore	PGF	7.80251e-05	0.00143277	6	6	cg19959591	75422632	2.8865e-05	0.00208371	0.451469	0.423971	0.422406	0.0290628	0.031216	0.0387463	0.0218696	0
chr8:144372931-144373839*Island	8	chr8:144372931-144373839	Island	ZNF696	7.88162e-05	0.0014459	10	8	cg24107665	144372932	3.04887e-06	0.000329193	0.335557	0.239046	0.245394	0.0901633	0.0430169	0.0418523	0.0453756	0
chr17:77043741-77044489*Island	17	chr17:77043741-77044489	Island	C1QTNF1	7.88386e-05	0.0014459	4	4	cg17015522	77044488	2.38867e-05	0.0017779	0.90085	0.865494	0.867052	0.0337987	0.0160803	0.0287651	0.0199611	0
chr7:42267546-42267823*N_Shore	7	chr7:42267546-42267823	N_Shore	GLI3	7.91422e-05	0.00144982	5	5	cg00560277	42267269	6.77878e-05	0.00410339	0.0910818	0.13483	0.136153	-0.0450708	0.0263249	0.0464682	0.0321463	0
chr4:148402198-148402760*N_Shore	4	chr4:148402198-148402760	N_Shore	EDNRA	7.91509e-05	0.00144982	8	7	cg05618426	148401958	0.000106357	0.00583131	0.448953	0.430268	0.392962	0.0559906	0.044942	0.0770918	0.025841	0
chr3:50396347-50397175*N_Shore	3	chr3:50396347-50397175	N_Shore	TMEM115	7.93856e-05	0.00145366	3	3	cg10133500	50396252	2.99368e-06	0.000325228	0.397375	0.340607	0.343712	0.0536628	0.0379946	0.0530135	0.0360413	0
chr16:619805-620195*N_Shore	16	chr16:619805-620195	N_Shore	NHLRC4	7.9487e-05	0.00145492	4	4	cg04064054	619455	1.29736e-05	0.00108397	0.645091	0.566329	0.602781	0.04231	0.0380624	0.0787778	0.0411201	0
chr16:619805-620195*N_Shore	16	chr16:619805-620195	N_Shore	PIGQ	7.9487e-05	0.00145492	4	4	cg04064054	619455	1.29736e-05	0.00108397	0.645091	0.566329	0.602781	0.04231	0.0380624	0.0787778	0.0411201	0
chr1:182573375-182573760*S_Shore	1	chr1:182573375-182573760	S_Shore	RGS16	7.984e-05	0.00146081	3	3	cg03517466	182573989	7.46432e-06	0.000693355	0.224371	0.192847	0.198861	0.0255106	0.025886	0.027237	0.0262905	0
chr19:19368708-19369681*Island	19	chr19:19368708-19369681	Island	HAPLN4	7.98668e-05	0.00146081	4	4	cg03775416	19368775	1.87587e-05	0.00146325	0.904329	0.833975	0.779705	0.124624	0.0656995	0.0893951	0.0578798	0
chr3:49967121-49967472*S_Shore	3	chr3:49967121-49967472	S_Shore	MON1A	8.03279e-05	0.00146848	5	5	cg13072940	49967521	9.04257e-06	0.000810066	0.350238	0.285469	0.318346	0.0318913	0.0326163	0.0439886	0.0275648	0
chr1:39570665-39571859*N_Shore	1	chr1:39570665-39571859	N_Shore	MACF1	8.03761e-05	0.0014689	4	3	cg08456420	39570175	9.88502e-06	0.000870796	0.464046	0.432722	0.44846	0.0155855	0.0366161	0.0369042	0.041415	0
chr19:18271738-18272232*Island	19	chr19:18271738-18272232	Island	PIK3R2	8.16386e-05	0.00148981	3	3	cg12492496	18271859	4.75356e-06	0.000475926	0.826274	0.756075	0.784081	0.0421932	0.0263602	0.0493506	0.0286477	0
chr8:127568676-127570873*Island	8	chr8:127568676-127570873	Island	FAM84B	8.20692e-05	0.00149566	13	13	cg06230848	127569163	2.2196e-05	0.00168006	0.232047	0.159911	0.154731	0.0773165	0.0529029	0.0466576	0.0395967	0
chr17:57408787-57410145*N_Shore	17	chr17:57408787-57410145	N_Shore	YPEL2	8.25259e-05	0.00150336	4	4	cg12080306	57407936	3.81237e-05	0.00259977	0.546558	0.570163	0.601418	-0.0548592	0.04319	0.0551058	0.0475157	0
chr16:10972782-10973305*N_Shore	16	chr16:10972782-10973305	N_Shore	CIITA	8.26166e-05	0.00150439	5	4	cg01351032	10971191	4.67496e-06	0.000468855	0.169275	0.0849368	0.103691	0.0655838	0.0402619	0.0185853	0.0203722	0
chr8:97657174-97657943*S_Shore	8	chr8:97657174-97657943	S_Shore	PGCP	8.35765e-05	0.00152071	3	3	cg03613618	97658325	3.95703e-05	0.00267769	0.627759	0.568834	0.600402	0.0273566	0.0361984	0.0629841	0.0426026	0
chr20:2632678-2633690*S_Shore	20	chr20:2632678-2633690	S_Shore	NOP56	8.35906e-05	0.00152071	6	6	cg05205351	2634775	3.07768e-05	0.00219031	0.388538	0.303888	0.341678	0.0468602	0.0483242	0.0432966	0.0382764	0
chr20:2632678-2633690*S_Shore	20	chr20:2632678-2633690	S_Shore	SNORA51	8.35906e-05	0.00152071	6	6	cg05205351	2634775	3.07768e-05	0.00219031	0.388538	0.303888	0.341678	0.0468602	0.0483242	0.0432966	0.0382764	0
chr20:2632678-2633690*S_Shore	20	chr20:2632678-2633690	S_Shore	SNORD110	8.35906e-05	0.00152071	6	6	cg05205351	2634775	3.07768e-05	0.00219031	0.388538	0.303888	0.341678	0.0468602	0.0483242	0.0432966	0.0382764	0
chr20:32699257-32700281*S_Shore	20	chr20:32699257-32700281	S_Shore	EIF2S2	8.4213e-05	0.00153156	3	3	cg01562356	32701112	8.9027e-06	0.000798348	0.793243	0.761754	0.75713	0.0361125	0.0216882	0.0316992	0.0244121	0
chr11:1083134-1083358*N_Shore	11	chr11:1083134-1083358	N_Shore	MUC2	8.45617e-05	0.00153742	3	3	cg15054281	1082155	5.78223e-05	0.00360798	0.587183	0.644811	0.64756	-0.0603771	0.039341	0.0435422	0.0260223	0
chr22:37962481-37962819*Island	22	chr22:37962481-37962819	Island	CDC42EP1	8.48015e-05	0.00154131	3	3	cg15035133	37962637	0.00622315	0.119104	0.0629386	0.0941895	0.0989209	-0.0359823	0.014816	0.0256124	0.0326773	0
chr19:34012271-34012936*S_Shore	19	chr19:34012271-34012936	S_Shore	PEPD	8.49074e-05	0.00154275	4	3	cg13993643	34013247	1.14514e-05	0.000980971	0.532082	0.504448	0.483521	0.0485618	0.0379298	0.0530493	0.03371	0
chr18:3012547-3013173*N_Shore	18	chr18:3012547-3013173	N_Shore	LPIN2	8.63834e-05	0.00156876	5	5	cg10904070	3012017	7.6293e-05	0.00450979	0.438255	0.364132	0.410233	0.0280229	0.0397056	0.0456438	0.0483492	0
chr8:37707149-37707507*S_Shore	8	chr8:37707149-37707507	S_Shore	BRF2	8.64901e-05	0.00157022	3	3	cg19904653	37707692	3.24187e-06	0.000346484	0.280231	0.23723	0.208013	0.0722172	0.0724378	0.0874156	0.0653109	0
chr2:26624603-26625057*Island	2	chr2:26624603-26625057	Island	C2orf39	8.6683e-05	0.00157194	9	9	cg01734112	26624760	0.000116421	0.00626247	0.136995	0.168167	0.143124	-0.00612885	0.0461212	0.0396233	0.0274227	0
chr17:36997448-36997661*Island	17	chr17:36997448-36997661	Island	C17orf98	8.66921e-05	0.00157194	3	3	cg20084219	36997449	2.41857e-05	0.00179444	0.640221	0.584249	0.517128	0.123093	0.0927661	0.118572	0.128378	0
chr15:59279741-59280720*N_Shore	15	chr15:59279741-59280720	N_Shore	RNF111	8.67299e-05	0.00157198	4	4	cg12283460	59279556	6.11179e-06	0.000588505	0.198714	0.133277	0.153602	0.0451129	0.0434012	0.0346987	0.0327758	0
chr13:67804593-67805459*N_Shelf	13	chr13:67804593-67805459	N_Shelf	PCDH9	8.6853e-05	0.0015733	4	4	cg23126342	67801125	5.82474e-05	0.00362634	0.681327	0.467061	0.543535	0.137792	0.0888869	0.102912	0.103657	0
chr19:2199921-2200126*Island	19	chr19:2199921-2200126	Island	DOT1L	8.68655e-05	0.0015733	3	3	cg13446753	2199988	1.5378e-05	0.0012499	0.827751	0.890262	0.892372	-0.0646205	0.0386276	0.0274648	0.0230937	0
chr11:61283864-61284147*Island	11	chr11:61283864-61284147	Island	SYT7	8.70137e-05	0.0015755	4	3	cg00009053	61283865	5.02415e-06	0.000498486	0.629019	0.570744	0.576772	0.0522467	0.0408197	0.0746171	0.0268662	0
chr2:97173851-97174485*Island	2	chr2:97173851-97174485	Island	NEURL3	8.77924e-05	0.00158829	10	8	cg13362112	97174246	4.41132e-06	0.000446481	0.173333	0.099337	0.124453	0.04888	0.0399141	0.0357503	0.0316559	0
chr5:180649487-180649768*N_Shore	5	chr5:180649487-180649768	N_Shore	TRIM41	8.78832e-05	0.00158945	3	3	cg25944717	180648843	7.80872e-06	0.000718153	0.649553	0.6323	0.610955	0.038598	0.0627475	0.0536566	0.0523177	0
chr2:72371121-72375004*Island	2	chr2:72371121-72375004	Island	CYP26B1	8.80236e-05	0.00158954	16	15	cg06049781	72371838	3.41996e-05	0.00238573	0.131393	0.148881	0.130152	0.00124152	0.0379446	0.0319963	0.0279024	0
chr16:3016646-3020326*Island	16	chr16:3016646-3020326	Island	PAQR4	8.82297e-05	0.00159082	15	15	cg05097643	3018470	0.000201725	0.00962006	0.362498	0.350227	0.297928	0.06457	0.0614252	0.0908127	0.0543314	0
chr10:32216901-32217102*N_Shore	10	chr10:32216901-32217102	N_Shore	ARHGAP12	8.85544e-05	0.00159511	7	7	cg22706007	32216359	2.78619e-05	0.0020259	0.271993	0.210283	0.229788	0.0422048	0.0532693	0.0628399	0.049598	0
chr19:12833104-12833574*S_Shore	19	chr19:12833104-12833574	S_Shore	TNPO2	8.85763e-05	0.00159511	5	5	cg00783916	12835059	0.000251576	0.0114579	0.230864	0.198008	0.205391	0.0254722	0.0252541	0.0281614	0.0215242	0
chr16:30107511-30107875*N_Shore	16	chr16:30107511-30107875	N_Shore	YPEL3	8.86949e-05	0.00159626	6	6	cg26709300	30106682	1.25997e-05	0.00105825	0.63305	0.54783	0.542364	0.0906861	0.0446634	0.0502341	0.0377773	0
chr7:30634124-30635058*S_Shore	7	chr7:30634124-30635058	S_Shore	GARS	9.01725e-05	0.00162186	6	6	cg16875104	30635889	6.5267e-06	0.000621327	0.446233	0.32505	0.364971	0.0812616	0.0646414	0.0899895	0.055026	0
chr7:128766335-128767982*Island	7	chr7:128766335-128767982	Island	LOC407835	9.03337e-05	0.00162377	7	6	cg27257291	128767981	6.63884e-06	0.000628781	0.552459	0.628535	0.631725	-0.0792657	0.0470667	0.0522164	0.0419877	0
chr1:27675919-27678016*Island	1	chr1:27675919-27678016	Island	SYTL1	9.05618e-05	0.00162637	9	9	cg03750567	27676637	8.60166e-06	0.000776489	0.909222	0.803328	0.801283	0.10794	0.0553176	0.0850958	0.0594498	0
chr19:2095395-2095727*N_Shore	19	chr19:2095395-2095727	N_Shore	MOBKL2A	9.0716e-05	0.00162865	3	3	cg06896207	2095364	3.06513e-06	0.000330141	0.35699	0.275386	0.271516	0.0854743	0.043425	0.0431574	0.0423086	0
chr5:126626053-126626901*Island	5	chr5:126626053-126626901	Island	MEGF10	9.11346e-05	0.00162883	9	9	cg04609576	126626362	5.80204e-05	0.00361792	0.17136	0.198446	0.163078	0.00828201	0.0481319	0.0334765	0.0290237	0
chr8:145047293-145052305*Island	8	chr8:145047293-145052305	Island	PLEC1	9.114e-05	0.00162883	22	20	cg08909802	145049419	1.81398e-05	0.00142698	0.196045	0.133578	0.120758	0.0752869	0.0450406	0.0399315	0.0202861	0
chr19:49617455-49618569*Island	19	chr19:49617455-49618569	Island	LIN7B	9.11518e-05	0.00162883	9	9	cg03630273	49618499	1.10426e-05	0.000953374	0.585867	0.548266	0.550068	0.035799	0.0302913	0.0323758	0.0270538	0
chr20:35491001-35492805*Island	20	chr20:35491001-35492805	Island	C20orf117	9.11605e-05	0.00162883	9	9	cg05628702	35491052	0.000130106	0.00682325	0.619452	0.565134	0.563958	0.0554937	0.0435581	0.0479371	0.0290896	0
chr17:79875425-79876124*S_Shore	17	chr17:79875425-79876124	S_Shore	MAFG	9.12e-05	0.00162887	4	4	cg07855221	79877314	1.7173e-05	0.00135942	0.335471	0.35965	0.402141	-0.0666705	0.0362119	0.0458098	0.0430974	0
chr17:79875425-79876124*S_Shore	17	chr17:79875425-79876124	S_Shore	SIRT7	9.12e-05	0.00162887	4	4	cg07855221	79877314	1.7173e-05	0.00135942	0.335471	0.35965	0.402141	-0.0666705	0.0362119	0.0458098	0.0430974	0
chr11:65153726-65154606*Island	11	chr11:65153726-65154606	Island	FRMD8	9.13341e-05	0.00162962	11	10	cg15829826	65153860	0.000288381	0.0127071	0.0893928	0.0590667	0.075884	0.0135088	0.0210202	0.0160629	0.0172203	0
chr18:47339411-47340956*Island	18	chr18:47339411-47340956	Island	ACAA2	9.27637e-05	0.00165412	7	6	cg23825830	47340935	6.53237e-05	0.00398296	0.126167	0.0942478	0.0967496	0.0294172	0.0204219	0.0193337	0.0152887	0
chr2:10262173-10263481*Island	2	chr2:10262173-10263481	Island	RRM2	9.30331e-05	0.00165691	12	12	cg00506866	10263480	9.24879e-06	0.00082435	0.132518	0.101102	0.104484	0.0280348	0.0203128	0.0184166	0.0135085	0
chr19:37959852-37960615*N_Shore	19	chr19:37959852-37960615	N_Shore	ZNF570	9.34227e-05	0.0016625	8	8	cg06328724	37958752	1.09355e-05	0.000944588	0.390435	0.342814	0.319647	0.0707881	0.0531619	0.0552769	0.047919	0
chr19:37959852-37960615*N_Shore	19	chr19:37959852-37960615	N_Shore	ZNF569	9.34227e-05	0.0016625	8	8	cg06328724	37958752	1.09355e-05	0.000944588	0.390435	0.342814	0.319647	0.0707881	0.0531619	0.0552769	0.047919	0
chr5:179228283-179229003*Island	5	chr5:179228283-179229003	Island	MGAT4B	9.48905e-05	0.00168811	3	3	cg10561067	179228859	3.99394e-06	0.000412418	0.261398	0.199549	0.205015	0.0563833	0.0309708	0.0328289	0.0228969	0
chr13:113761566-113765534*Island	13	chr13:113761566-113765534	Island	F7	9.50775e-05	0.0016899	10	9	cg07472704	113763758	0.000319357	0.0137691	0.453913	0.392936	0.371716	0.0821973	0.0720214	0.0667766	0.0445975	0
chr11:16759945-16760386*S_Shore	11	chr11:16759945-16760386	S_Shore	C11orf58	9.51627e-05	0.00169023	6	6	cg05512310	16761290	4.54417e-06	0.0004573	0.561341	0.52168	0.522513	0.0388284	0.0371298	0.0532777	0.0338204	0
chr17:78165077-78165293*S_Shore	17	chr17:78165077-78165293	S_Shore	CARD14	9.52013e-05	0.00169023	5	5	cg25215834	78166267	6.16853e-06	0.000592673	0.533964	0.464237	0.466465	0.0674983	0.0398537	0.0630753	0.0582699	0
chr2:230932468-230933550*S_Shore	2	chr2:230932468-230933550	S_Shore	SLC16A14	9.54205e-05	0.0016931	6	6	cg20822693	230934399	3.29383e-06	0.000350912	0.690157	0.740357	0.748577	-0.0584196	0.0501615	0.0406155	0.0362836	0
chr18:21017671-21018011*S_Shore	18	chr18:21017671-21018011	S_Shore	C18orf45	9.56943e-05	0.00169744	3	3	cg25436157	21018562	4.16511e-05	0.00278218	0.490533	0.450654	0.465359	0.0251737	0.0382429	0.0318379	0.0241821	0
chr1:112531559-112533773*N_Shore	1	chr1:112531559-112533773	N_Shore	KCND3	9.60751e-05	0.00170351	4	4	cg24006352	112530294	0.00327779	0.0764099	0.778618	0.808326	0.803414	-0.0247964	0.0235538	0.0431281	0.0279469	0
chr1:212872460-212874048*S_Shore	1	chr1:212872460-212874048	S_Shore	BATF3	9.69922e-05	0.00171699	5	5	cg15718594	212874742	0.000471491	0.0184503	0.214238	0.238024	0.257695	-0.0434568	0.0282851	0.0313839	0.0206933	0
chr9:116701-118177*Island	9	chr9:116701-118177	Island	FOXD4	9.70523e-05	0.00171699	3	3	cg25391162	118091	5.42428e-06	0.000530421	0.315072	0.359474	0.330184	-0.0151123	0.0270759	0.021939	0.0196186	0
chr16:6068914-6070401*Island	16	chr16:6068914-6070401	Island	A2BP1	9.70552e-05	0.00171699	9	8	cg02119348	6069731	0.00031219	0.0135286	0.168853	0.184585	0.160553	0.00830009	0.0294012	0.0198693	0.0227309	0
chr7:1570406-1571136*N_Shore	7	chr7:1570406-1571136	N_Shore	MAFK	9.70593e-05	0.00171699	7	7	cg19778698	1570060	0.000145626	0.00742932	0.20256	0.170974	0.177006	0.0255541	0.0310172	0.0294123	0.0159445	0
chr7:5632335-5634555*S_Shore	7	chr7:5632335-5634555	S_Shore	FSCN1	9.71955e-05	0.00171888	3	3	cg15246238	5635134	8.14554e-06	0.000744082	0.596276	0.644891	0.67925	-0.0829742	0.0474275	0.0587524	0.0407364	0
chr1:155108007-155108611*Island	1	chr1:155108007-155108611	Island	RAG1AP1	9.74272e-05	0.00172177	7	7	cg12464869	155108011	2.06557e-05	0.00158182	0.0532793	0.0404971	0.0382759	0.0150035	0.0135132	0.0140255	0.0121487	0
chr2:56150340-56151180*Island	2	chr2:56150340-56151180	Island	EFEMP1	9.76322e-05	0.00172349	11	11	cg16118212	56151071	1.65331e-05	0.00132123	0.120949	0.161605	0.12333	-0.0023812	0.0579317	0.0474292	0.0392338	0
chr17:72848166-72848901*Island	17	chr17:72848166-72848901	Island	GRIN2C	9.80231e-05	0.0017297	4	4	cg00439658	72848669	3.60205e-05	0.0024891	0.141421	0.184332	0.142326	-0.00090487	0.0277465	0.0219008	0.0195487	0
chr12:117484305-117484627*N_Shore	12	chr12:117484305-117484627	N_Shore	TESC	9.8467e-05	0.00173626	4	4	cg01804036	117483310	1.18179e-05	0.0010031	0.132036	0.143292	0.133943	-0.00190738	0.0311021	0.0219069	0.0250784	0
chr17:79880449-79880872*S_Shore	17	chr17:79880449-79880872	S_Shore	MAFG	9.85034e-05	0.00173626	7	7	cg07824483	79882042	0.00025049	0.0114202	0.359166	0.365805	0.389581	-0.0304148	0.0504629	0.0474514	0.0581877	0
chr12:7342074-7342417*S_Shore	12	chr12:7342074-7342417	S_Shore	PEX5	9.88497e-05	0.00174167	4	4	cg15754084	7343020	6.37507e-05	0.00390681	0.641939	0.522074	0.556397	0.0855412	0.0429409	0.0678302	0.0391662	0
chr8:143781581-143782609*N_Shore	8	chr8:143781581-143782609	N_Shore	LY6K	9.9055e-05	0.00174441	6	5	cg22146357	143781406	1.50311e-05	0.00122453	0.183073	0.130753	0.12286	0.0602131	0.0460633	0.02542	0.0259045	0
chr5:176829339-176829756*N_Shore	5	chr5:176829339-176829756	N_Shore	PFN3	9.93776e-05	0.00174904	6	6	cg20095656	176827793	8.68582e-06	0.000783284	0.916957	0.881055	0.876269	0.0406878	0.0221018	0.0288323	0.0219272	0
chr16:67571252-67572728*Island	16	chr16:67571252-67572728	Island	FAM65A	9.94729e-05	0.00174946	5	5	cg03615565	67572595	8.22724e-06	0.000749602	0.539869	0.467731	0.49915	0.040719	0.0326595	0.0529926	0.0328338	0
chr2:189156416-189157719*Island	2	chr2:189156416-189157719	Island	GULP1	9.96496e-05	0.00174946	14	14	cg14638272	189157361	1.75125e-05	0.00138381	0.117412	0.13568	0.12161	-0.00419826	0.0290189	0.0235565	0.0219061	0
chr12:123351641-123351918*N_Shore	12	chr12:123351641-123351918	N_Shore	VPS37B	9.96593e-05	0.00174946	7	7	cg00916854	123350361	0.0114276	0.177028	0.491477	0.486317	0.490936	0.000541583	0.0294611	0.0402689	0.0340536	0
chr17:79283863-79284131*N_Shore	17	chr17:79283863-79284131	N_Shore	C17orf55	0.000100237	0.00175768	11	11	cg24870966	79282893	0.000144856	0.00740078	0.670455	0.59616	0.632171	0.0382838	0.068924	0.0976036	0.0516629	0
chr18:28621489-28623117*Island	18	chr18:28621489-28623117	Island	DSC3	0.000100448	0.00175839	17	17	cg11832722	28623060	3.98249e-05	0.00268873	0.14926	0.181407	0.15851	-0.00925001	0.0333494	0.0297187	0.0240612	0
chr9:131709353-131710564*Island	9	chr9:131709353-131710564	Island	NUP188	0.000100695	0.00176115	9	9	cg13812587	131709471	0.000106539	0.00583384	0.135091	0.114048	0.108901	0.0261906	0.0223808	0.0185973	0.0144068	0
chr9:131709353-131710564*Island	9	chr9:131709353-131710564	Island	DOLK	0.000100695	0.00176115	9	9	cg13812587	131709471	0.000106539	0.00583384	0.135091	0.114048	0.108901	0.0261906	0.0223808	0.0185973	0.0144068	0
chr16:2255168-2255828*S_Shore	16	chr16:2255168-2255828	S_Shore	MLST8	0.000101033	0.00176601	6	6	cg04079779	2256121	0.00839684	0.144677	0.365131	0.300166	0.305403	0.0597279	0.0752086	0.0950933	0.0701876	0
chr19:50083757-50083986*S_Shore	19	chr19:50083757-50083986	S_Shore	PRRG2	0.000101191	0.00176824	3	3	cg06468619	50084552	4.80103e-05	0.00310456	0.711718	0.676658	0.685486	0.0262318	0.0240876	0.0422962	0.0339102	0
chr19:50083757-50083986*S_Shore	19	chr19:50083757-50083986	S_Shore	NOSIP	0.000101191	0.00176824	3	3	cg06468619	50084552	4.80103e-05	0.00310456	0.711718	0.676658	0.685486	0.0262318	0.0240876	0.0422962	0.0339102	0
chr6:49518315-49519186*N_Shore	6	chr6:49518315-49519186	N_Shore	C6orf141	0.000101713	0.00177645	5	4	cg05829479	49518079	0.000286827	0.0126577	0.0498259	0.0821918	0.0811113	-0.0312854	0.0172625	0.0249011	0.0147986	0
chr11:430814-431775*N_Shore	11	chr11:430814-431775	N_Shore	ANO9	0.000101731	0.00177645	4	3	cg16362232	430036	7.62152e-06	0.000703877	0.932524	0.880673	0.883257	0.0492674	0.0224454	0.0607318	0.0460622	0
chr4:169552716-169552947*N_Shore	4	chr4:169552716-169552947	N_Shore	PALLD	0.000102335	0.00178611	5	5	cg05259872	169552310	4.01826e-06	0.000413829	0.345591	0.394612	0.413046	-0.0674548	0.0291035	0.0530003	0.0354183	0
chr6:125474804-125475722*S_Shore	6	chr6:125474804-125475722	S_Shore	TPD52L1	0.000102672	0.00179146	3	3	cg02801114	125476162	1.15984e-05	0.000991608	0.443339	0.512812	0.510902	-0.0675627	0.0450717	0.0621424	0.0480468	0
chr19:58715220-58716033*Island	19	chr19:58715220-58716033	Island	ZNF274	0.000102856	0.00179361	6	6	cg00298065	58715577	1.14293e-05	0.000979714	0.534901	0.638012	0.601584	-0.0666831	0.0413086	0.066323	0.0470018	0
chr6:28554863-28555124*N_Shore	6	chr6:28554863-28555124	N_Shore	SCAND3	0.000103071	0.00179505	14	13	cg20897936	28554741	2.56224e-05	0.0018891	0.228237	0.275571	0.256264	-0.0280263	0.0316417	0.0377426	0.0324535	0
chr19:50887181-50887933*N_Shore	19	chr19:50887181-50887933	N_Shore	POLD1	0.000103261	0.00179782	3	3	cg19063397	50887127	5.08861e-06	0.000504597	0.140977	0.111562	0.114876	0.0261014	0.0185274	0.0166227	0.0137245	0
chr19:38746638-38747379*N_Shore	19	chr19:38746638-38747379	N_Shore	PPP1R14A	0.000103412	0.00179955	5	5	cg08052629	38746615	4.53538e-06	0.000456938	0.579588	0.675852	0.661634	-0.0820462	0.0488816	0.0573837	0.0387781	0
chr6:169631759-169632823*N_Shore	6	chr6:169631759-169632823	N_Shore	THBS2	0.0001039	0.00180139	7	7	cg01320433	169630013	0.000131885	0.00688987	0.353316	0.305498	0.30548	0.0478362	0.0667799	0.0744966	0.0541805	0
chr16:88536936-88537375*Island	16	chr16:88536936-88537375	Island	ZFPM1	0.000106416	0.00184201	4	4	cg04387347	88537187	2.78297e-05	0.00202473	0.263578	0.196662	0.189153	0.0744248	0.0870547	0.0610353	0.0571533	0
chr12:57609976-57611168*S_Shelf	12	chr12:57609976-57611168	S_Shelf	NXPH4	0.000107532	0.0018602	4	4	cg01606023	57613744	3.86483e-05	0.0026264	0.127779	0.147502	0.149664	-0.0218856	0.0236796	0.0294304	0.0200872	0
chr11:101453357-101454684*Island	11	chr11:101453357-101454684	Island	TRPC6	0.000107572	0.0018602	7	6	cg07013734	101454683	0.000228002	0.010609	0.0385899	0.0426868	0.0425341	-0.00394413	0.0156899	0.0170884	0.0150724	0
chr10:35928501-35931893*Island	10	chr10:35928501-35931893	Island	FZD8	0.000107897	0.00186344	16	13	cg06020238	35928558	0.000118688	0.00637041	0.151562	0.125314	0.110506	0.0410554	0.0277414	0.0208509	0.0145266	0
chr5:138533870-138534113*S_Shore	5	chr5:138533870-138534113	S_Shore	SIL1	0.00010818	0.00186704	7	7	cg19025497	138534324	2.04017e-05	0.00156725	0.155538	0.110476	0.133189	0.0223489	0.0230961	0.0221189	0.0221718	0
chr8:142237037-142237360*S_Shore	8	chr8:142237037-142237360	S_Shore	SLC45A4	0.000108736	0.00187536	7	7	cg07769015	142238770	7.79837e-06	0.000717576	0.468877	0.415464	0.434619	0.0342581	0.0525149	0.0530196	0.0648605	0
chr15:59041081-59042283*S_Shore	15	chr15:59041081-59042283	S_Shore	ADAM10	0.00010905	0.00188022	3	3	cg08898775	59042684	8.78618e-06	0.000790467	0.721223	0.674037	0.67713	0.044093	0.0250486	0.0441421	0.0288601	0
chr1:153643318-153643529*S_Shore	1	chr1:153643318-153643529	S_Shore	ILF2	0.000109591	0.00188844	6	6	cg15473083	153644317	7.58515e-06	0.000701253	0.0608984	0.0422352	0.0378567	0.0230418	0.0254417	0.0116851	0.014734	0
chr1:47881896-47883065*Island	1	chr1:47881896-47883065	Island	FOXE3	0.000109987	0.00189416	6	6	cg23115387	47882936	3.93449e-06	0.000407106	0.414082	0.507714	0.468981	-0.0548995	0.0409997	0.0449718	0.0375282	0
chr7:100424424-100425626*N_Shore	7	chr7:100424424-100425626	N_Shore	EPHB4	0.00011014	0.00189623	3	3	cg01869186	100423987	0.000170488	0.00841509	0.254866	0.297983	0.302628	-0.0477617	0.0234899	0.0338158	0.025579	0
chr16:67183208-67184968*Island	16	chr16:67183208-67184968	Island	B3GNT9	0.000112269	0.00193156	7	7	cg05333146	67183725	1.3363e-05	0.00111019	0.754923	0.712886	0.657709	0.0972148	0.0377398	0.0557901	0.0458934	0
chr1:116380359-116382364*S_Shore	1	chr1:116380359-116382364	S_Shore	NHLH2	0.000112903	0.00194166	3	3	cg02030187	116383634	2.19171e-05	0.00166109	0.135059	0.0917672	0.0937155	0.0413436	0.0353574	0.0375335	0.0231352	0
chr1:79472281-79472537*Island	1	chr1:79472281-79472537	Island	ELTD1	0.000112955	0.00194166	7	6	cg15084543	79472408	0.00333679	0.0774268	0.301403	0.386168	0.296259	0.00514416	0.0848477	0.0533603	0.0647955	0
chr1:164545540-164545917*Island	1	chr1:164545540-164545917	Island	PBX1	0.000113654	0.00195309	4	3	cg00222472	164545783	6.11682e-06	0.000588668	0.667415	0.807473	0.785876	-0.11846	0.0643281	0.0519627	0.0467812	0
chr5:132082873-132083911*Island	5	chr5:132082873-132083911	Island	CCNI2	0.000114736	0.00197074	5	5	cg01883408	132083691	5.89238e-06	0.000570095	0.337629	0.415385	0.385369	-0.0477398	0.0298425	0.0414521	0.0262951	0
chr4:74864113-74864329*S_Shore	4	chr4:74864113-74864329	S_Shore	CXCL5	0.000114848	0.0019715	6	6	cg04559909	74864725	1.35107e-05	0.00111768	0.555228	0.577968	0.620342	-0.0651137	0.0438311	0.0532401	0.036074	0
chr2:242815056-242815599*N_Shelf	2	chr2:242815056-242815599	N_Shelf	C2orf85	0.000115151	0.00197555	7	6	cg23491841	242811149	5.88042e-06	0.000569338	0.538083	0.51358	0.486007	0.0520766	0.0607485	0.0484996	0.0515757	0
chr17:44928287-44929690*Island	17	chr17:44928287-44929690	Island	WNT9B	0.000115275	0.00197595	9	9	cg07993743	44928288	1.35159e-05	0.00111768	0.438092	0.390968	0.376101	0.0619912	0.041955	0.0519617	0.0384482	0
chr4:134071662-134073628*Island	4	chr4:134071662-134073628	Island	PCDH10	0.000115363	0.00197649	5	5	cg06667761	134073627	2.71136e-05	0.00197999	0.157925	0.182793	0.162627	-0.0047013	0.0280002	0.0184643	0.0194474	0
chr18:19744936-19752363*Island	18	chr18:19744936-19752363	Island	GATA6	0.000115575	0.00197736	14	14	cg22446331	19750865	0.0209119	0.257318	0.065227	0.0652391	0.0600167	0.00521037	0.0118825	0.0109087	0.00925526	0
chr7:130126017-130126801*N_Shore	7	chr7:130126017-130126801	N_Shore	MEST	0.000115694	0.00197736	11	11	cg20801778	130125200	0.00303495	0.0723668	0.671988	0.700045	0.701758	-0.02977	0.0283439	0.0282239	0.02516	0
chr1:150254365-150254637*S_Shore	1	chr1:150254365-150254637	S_Shore	C1orf51	0.000115824	0.00197843	6	6	cg09563216	150255241	1.64746e-05	0.00131895	0.41081	0.467062	0.44542	-0.0346098	0.0520412	0.0542031	0.0387164	0
chr11:116661034-116661410*S_Shore	11	chr11:116661034-116661410	S_Shore	APOA5	0.000115945	0.00197935	6	6	cg00411697	116663321	2.6195e-05	0.00192809	0.741428	0.71135	0.721847	0.0195816	0.0236108	0.0275269	0.0180656	0
chr17:7754918-7755584*Island	17	chr17:7754918-7755584	Island	KDM6B	0.000116058	0.0019807	3	3	cg09911083	7754956	9.9221e-05	0.00551192	0.587172	0.564847	0.548378	0.0387945	0.0314905	0.0344562	0.0302054	0
chr1:90098230-90099292*S_Shore	1	chr1:90098230-90099292	S_Shore	LRRC8C	0.000116612	0.00198957	3	3	cg06804564	90100070	4.47617e-05	0.00293871	0.118609	0.146587	0.141061	-0.0224522	0.0156382	0.0316964	0.0253872	0
chr13:36049570-36050159*N_Shore	13	chr13:36049570-36050159	N_Shore	MAB21L1	0.000117421	0.0020028	3	3	cg21392700	36049335	0.000100828	0.00558335	0.130832	0.163353	0.161662	-0.0308293	0.01465	0.0205488	0.0207983	0
chr13:36049570-36050159*N_Shore	13	chr13:36049570-36050159	N_Shore	NBEA	0.000117421	0.0020028	3	3	cg21392700	36049335	0.000100828	0.00558335	0.130832	0.163353	0.161662	-0.0308293	0.01465	0.0205488	0.0207983	0
chr13:36049570-36050159*N_Shore	13	chr13:36049570-36050159	N_Shore	MIR548F5	0.000117421	0.0020028	3	3	cg21392700	36049335	0.000100828	0.00558335	0.130832	0.163353	0.161662	-0.0308293	0.01465	0.0205488	0.0207983	0
chr6:33160945-33161337*Island	6	chr6:33160945-33161337	Island	COL11A2	0.000117897	0.00200704	14	13	cg02266086	33161336	1.25242e-05	0.00105291	0.50804	0.440744	0.445836	0.0622035	0.0659513	0.0694473	0.0619549	0
chr1:3688553-3689684*Island	1	chr1:3688553-3689684	Island	LOC388588	0.000117955	0.00200704	9	9	cg01535630	3689683	0.0019806	0.0536116	0.167999	0.143197	0.147604	0.0203946	0.0278976	0.0201527	0.0209341	0
chr6:94126272-94129677*Island	6	chr6:94126272-94129677	Island	EPHA7	0.000118159	0.00200723	17	17	cg08263071	94126643	6.67746e-05	0.00406018	0.124633	0.155587	0.117208	0.00742509	0.0422377	0.0265861	0.0303883	0
chr17:60781141-60781934*S_Shore	17	chr17:60781141-60781934	S_Shore	2014-03-10	0.00011865	0.00201439	6	6	cg17050097	60783168	0.000266311	0.0119468	0.759131	0.786061	0.777489	-0.0183583	0.023439	0.0220361	0.0218938	0
chr17:6797429-6797724*N_Shore	17	chr17:6797429-6797724	N_Shore	ALOX12P2	0.000118799	0.00201576	6	6	cg08366845	6796745	0.000496645	0.0192044	0.696436	0.63989	0.62522	0.0712159	0.0465984	0.0790259	0.0567553	0
chr7:50132572-50132921*Island	7	chr7:50132572-50132921	Island	ZPBP	0.000119543	0.0020276	4	4	cg07750378	50132764	2.41069e-05	0.00179085	0.37551	0.309735	0.293694	0.0818158	0.0612142	0.076513	0.0751986	0
chr19:3831363-3831807*Island	19	chr19:3831363-3831807	Island	ZFR2	0.000120854	0.00204846	3	3	cg15062725	3831364	2.99935e-05	0.00214845	0.74906	0.705636	0.679435	0.0696247	0.0368863	0.060383	0.0416571	0
chr7:128550409-128550903*S_Shore	7	chr7:128550409-128550903	S_Shore	KCP	0.000120877	0.00204846	6	6	cg16155175	128550946	1.68428e-05	0.0013416	0.698269	0.74147	0.745442	-0.0471726	0.0301523	0.0684179	0.0287444	0
chr21:48068517-48068808*Island	21	chr21:48068517-48068808	Island	PRMT2	0.00012135	0.00205589	3	3	cg04631283	48068748	3.02013e-05	0.00215719	0.715578	0.751931	0.753688	-0.03811	0.0264445	0.0232116	0.0258977	0
chr6:74405600-74406021*N_Shore	6	chr6:74405600-74406021	N_Shore	CD109	0.000122011	0.00206609	5	5	cg25850808	74405048	0.000105199	0.00578026	0.443275	0.389034	0.417267	0.0260082	0.0354427	0.0393298	0.0401415	0
chr5:176980789-176981789*S_Shore	5	chr5:176980789-176981789	S_Shore	FAM193B	0.000122922	0.00208031	6	6	cg12152566	176981910	1.41371e-05	0.00116244	0.355184	0.270698	0.292115	0.0630686	0.037318	0.0536112	0.0422218	0
chr17:72931729-72932601*S_Shore	17	chr17:72931729-72932601	S_Shore	OTOP3	0.000123888	0.00209468	5	5	cg09808774	72933718	0.000112935	0.00611945	0.225291	0.258784	0.238665	-0.0133735	0.0198323	0.0271462	0.0210614	0
chr1:2345891-2346156*N_Shore	1	chr1:2345891-2346156	N_Shore	PEX10	0.000124086	0.00209468	11	10	cg24439334	2345374	1.4594e-05	0.001195	0.840839	0.820348	0.833779	0.00706009	0.0479606	0.0488992	0.0281165	0
chr11:31831620-31839038*Island	11	chr11:31831620-31839038	Island	PAX6	0.000124365	0.00209468	36	35	cg11973244	31832367	2.10176e-05	0.00160257	0.133619	0.110646	0.119013	0.0146066	0.0182382	0.0137967	0.0157331	0
chr20:62681074-62681332*Island	20	chr20:62681074-62681332	Island	SOX18	0.000125179	0.00210779	3	3	cg24199599	62681243	8.86659e-06	0.000795515	0.155479	0.184539	0.215512	-0.0600336	0.0460298	0.0575543	0.0493701	0
chr4:2009714-2011428*N_Shore	4	chr4:2009714-2011428	N_Shore	WHSC2	0.000125433	0.00211144	3	3	cg17797863	2009396	0.000122713	0.00652683	0.375047	0.329537	0.363239	0.0118084	0.0470728	0.04957	0.0517825	0
chr11:1892037-1892556*N_Shore	11	chr11:1892037-1892556	N_Shore	LSP1	0.00012579	0.00211474	7	7	cg08687540	1890204	4.46111e-06	0.000450743	0.570075	0.624137	0.628195	-0.0581193	0.0299431	0.0350717	0.0255135	0
chr20:35233829-35234782*N_Shore	20	chr20:35233829-35234782	N_Shore	C20orf24	0.000125796	0.00211474	3	3	cg19562969	35233582	7.60517e-06	0.000702735	0.361628	0.306197	0.304942	0.0566864	0.0353308	0.0510088	0.0392273	0
chr3:194406440-194409045*N_Shore	3	chr3:194406440-194409045	N_Shore	FAM43A	0.000125797	0.00211474	4	4	cg02072170	194406190	9.82057e-06	0.000866546	0.0985998	0.0824371	0.0858161	0.0127837	0.0205269	0.0149341	0.017787	0
[truncated: 3,387 more rows]

## Sheet: ClassB_BOP_Greater_2
BOP	CHR	UCSC_CPG_ISLANDS_NAME	RELATION_TO_UCSC_CPG_ISLAND	GeneName	DSvsDSS_Manova	DSvsDSS_Manova_FDR	n.CpG	effective_n.CpG	ID_REF_Best_CpG	MAPINFO	DSvsDSS_Anova	DSvsDSS_Anova_FDR	DS_mean	DSM_mean	DSS_mean	Delta_DS_mean.DSS_mean	DS_sd	DSM_sd	DSS_sd	Bubble
[truncated: 889 more rows]

[truncated: 4 more sheets: ClassA_BOP_Less3, ClassB_BOP_Less3, ClassC, ClassD]
