# Supplementary material for: Identification of a DNA methylation signature in blood cells from persons with Down Syndrome
Source: Aging (Albany NY). 2014 Jan 8;7(2):82–93. doi: 10.18632/aging.100715 (PMC4359691; doi:10.18632/aging.100715)
Supplement: Supplementary file 2 [file aging-07-0082-s002.xls]

## Sheet: Sheet1
ID_REF	CHR	MAPINFO	Probe_SNPs	Probe_SNPs_10	UCSC_REFGENE_NAME	UCSC_REFGENE_ACCESSION	UCSC_REFGENE_GROUP	UCSC_CPG_ISLANDS_NAME	RELATION_TO_UCSC_CPG_ISLAND	Class	BOP	n.CpG	effective_n.CpG	DSvsDSS_Manova	DSvsDSS_Anova	DSvsDSS_Manova_FDR	DSvsDSS_Anova_FDR	DS_mean	DSM_mean	DSS_mean	DS_sd	DSM_sd	DSS_sd	Delta_DS_mean.DSS_mean	Single	Bubble
cg05724492	16	979662			LMF1	NM_022773	Body	chr16:979422-979663	Island	ClassA	chr16:979422-979663*Island	3	3	9.75822e-14	2.28029e-14	4.05382e-11	4.61854e-11	0.60874	0.945856	0.954169	0.0988935	0.0716877	0.0521356	-0.345428	1	2
cg07338658	16	979488			LMF1	NM_022773	Body	chr16:979422-979663	Island	ClassA	chr16:979422-979663*Island	3	3	9.75822e-14	5.15531e-12	4.05382e-11	4.73137e-09	0.612159	0.929117	0.938217	0.114612	0.0761901	0.0493704	-0.326058	1	2
cg05204097	16	979553		rs35712783	LMF1	NM_022773	Body	chr16:979422-979663	Island	ClassA	chr16:979422-979663*Island	3	3	9.75822e-14	1.54958e-13	4.05382e-11	2.3539e-10	0.544238	0.85047	0.860189	0.0971517	0.068396	0.0452035	-0.315951	1	2
cg01435643	13	113689776			MCF2L;MCF2L	NM_001112732;NM_024979	Body;Body	chr13:113687421-113687828	S_Shore	ClassA	chr13:113687421-113687828*S_Shore	8	7	3.88876e-18	7.21861e-20	1.2459e-14	1.81714e-15	0.184239	0.416366	0.458419	0.0560422	0.0799618	0.0714909	-0.27418	1	2
cg17890940	7	1782346			ELFN1	NM_001128636	5'UTR	chr7:1784027-1786934	N_Shore	ClassA	chr7:1784027-1786934*N_Shore	8	8	2.15831e-11	3.01696e-13	4.3765e-09	3.99715e-10	0.550766	0.792713	0.820727	0.0825423	0.0624533	0.0448832	-0.269962	1	2
cg04873098	1	3165191			PRDM16;PRDM16	NM_022114;NM_199454	Body;Body	chr1:3163969-3164643	S_Shore	ClassA	chr1:3163969-3164643*S_Shore	3	3	2.31341e-14	6.27631e-16	1.17818e-11	2.63323e-12	0.436034	0.668305	0.696762	0.0721646	0.0643026	0.045134	-0.260728	1	2
cg02225599	7	27143252			HOXA2	NM_006735	TSS1500	chr7:27143181-27143479	Island	ClassA	chr7:27143181-27143479*Island	7	7	2.11987e-15	1.3282e-16	1.56294e-12	7.57842e-13	0.142025	0.404876	0.390372	0.0418576	0.104746	0.0597677	-0.248347	1	2
cg04027736	7	27143403			HOXA2	NM_006735	TSS1500	chr7:27143181-27143479	Island	ClassA	chr7:27143181-27143479*Island	7	7	2.11987e-15	1.21956e-16	1.56294e-12	7.41033e-13	0.375051	0.637525	0.620265	0.0598155	0.0874731	0.0395626	-0.245213	1	2
cg01876338	2	54087008			GPR75;LOC100302652;GPR75	NM_006794;NM_001164165;NM_006794	5'UTR;1stExon;1stExon	chr2:54086776-54087266	Island	ClassA	chr2:54086776-54087266*Island	10	9	2.04555e-15	3.98114e-15	1.55366e-12	1.07926e-11	0.538292	0.79071	0.772668	0.0648503	0.0893873	0.046953	-0.234376	1	2
cg19961545	2	54087066			GPR75;LOC100302652;LOC100302652;GPR75	NM_006794;NM_001164165;NM_001164165;NM_006794	5'UTR;1stExon;5'UTR;1stExon	chr2:54086776-54087266	Island	ClassA	chr2:54086776-54087266*Island	10	9	2.04555e-15	5.20941e-13	1.55366e-12	6.46448e-10	0.619866	0.864249	0.850176	0.0647651	0.0857276	0.0516436	-0.23031	1	2
cg00701946	2	54087200			LOC100302652;GPR75	NM_001164165;NM_006794	TSS200;TSS200	chr2:54086776-54087266	Island	ClassA	chr2:54086776-54087266*Island	10	9	2.04555e-15	5.28028e-14	1.55366e-12	9.122e-11	0.540111	0.790246	0.767426	0.0605542	0.0987968	0.0564931	-0.227315	1	2
cg13704680	18	77905298			LOC100130522;LOC100130522	NR_028339;NR_028340	TSS1500;TSS1500	chr18:77905297-77905566	Island	ClassA	chr18:77905297-77905566*Island	5	3	0.00011783	8.84398e-05	0.00200704	0.00505812	0.132087	0.346301	0.355914	0.097084	0.135801	0.0955102	-0.223827	1	2
cg05004142	16	57562740			CCDC102A	NM_033212	Body	chr16:57562451-57563325	Island	ClassA	chr16:57562451-57563325*Island	4	4	9.88546e-06	0.00235002	0.000259331	0.0605585	0.458178	0.696758	0.681657	0.115763	0.142382	0.144724	-0.223478	1	2
cg12061113	18	77905747			LOC100130522;LOC100130522	NR_028339;NR_028340	TSS200;TSS200	chr18:77905297-77905566	S_Shore	ClassA	chr18:77905297-77905566*S_Shore	5	5	0.000185082	2.69948e-05	0.00285472	0.00197541	0.15534	0.338025	0.37615	0.097503	0.133631	0.0829354	-0.22081	1	2
cg14832904	2	54087028			GPR75;LOC100302652;GPR75	NM_006794;NM_001164165;NM_006794	5'UTR;1stExon;1stExon	chr2:54086776-54087266	Island	ClassA	chr2:54086776-54087266*Island	10	9	2.04555e-15	2.3346e-14	1.55366e-12	4.6748e-11	0.559574	0.787076	0.774993	0.0584496	0.0840415	0.0461229	-0.21542	1	2
cg19127638	10	70322442			TET1	NM_030625	5'UTR	chr10:70320130-70320822	S_Shore	ClassA	chr10:70320130-70320822*S_Shore	11	10	2.76638e-08	1.00686e-09	1.8264e-06	4.02847e-07	0.559262	0.757545	0.77163	0.0759552	0.061693	0.0660501	-0.212368	1	2
cg12451530	2	54087209			LOC100302652;GPR75	NM_001164165;NM_006794	TSS200;TSS200	chr2:54086776-54087266	Island	ClassA	chr2:54086776-54087266*Island	10	9	2.04555e-15	3.4064e-15	1.55366e-12	9.5277e-12	0.669102	0.894101	0.879943	0.0589076	0.0804062	0.0412444	-0.210841	1	2
cg06166490	7	27143334			HOXA2	NM_006735	TSS1500	chr7:27143181-27143479	Island	ClassA	chr7:27143181-27143479*Island	7	7	2.11987e-15	6.4876e-16	1.56294e-12	2.65033e-12	0.380366	0.591792	0.588233	0.0453112	0.0876678	0.0443815	-0.207867	1	2
cg13287964	18	77905751			LOC100130522;LOC100130522	NR_028339;NR_028340	TSS200;TSS200	chr18:77905297-77905566	S_Shore	ClassA	chr18:77905297-77905566*S_Shore	5	5	0.000185082	1.56255e-05	0.00285472	0.00126476	0.190303	0.362747	0.396673	0.0892664	0.113018	0.0757729	-0.20637	1	2
cg06401979	7	27143717			HOXA2	NM_006735	TSS1500	chr7:27143181-27143479	S_Shore	ClassA	chr7:27143181-27143479*S_Shore	4	3	1.39424e-12	8.8093e-14	4.01439e-10	1.42412e-10	0.247034	0.467818	0.450782	0.0454194	0.0864415	0.0527379	-0.203748	1	2
cg21644740	6	29599248			GABBR1;GABBR1	NM_021904;NM_001470	Body;Body	chr6:29600192-29600661	N_Shore	ClassA	chr6:29600192-29600661*N_Shore	23	22	5.90125e-12	4.0344e-11	1.48765e-09	2.65182e-08	0.439605	0.614991	0.642374	0.0500704	0.0791351	0.0633835	-0.202769	1	2
cg13185177	3	194119885			GP5	NM_004488	5'UTR	chr3:194117601-194118988	S_Shore	ClassA	chr3:194117601-194118988*S_Shore	7	7	5.99244e-18	6.77166e-20	1.40208e-14	1.81714e-15	0.291529	0.45006	0.494031	0.0582999	0.0711438	0.0493069	-0.202501	1	2
cg17806418	6	29599319			GABBR1;GABBR1	NM_021904;NM_001470	Body;Body	chr6:29600192-29600661	N_Shore	ClassA	chr6:29600192-29600661*N_Shore	23	22	5.90125e-12	1.70588e-11	1.48765e-09	1.27913e-08	0.456798	0.637735	0.65835	0.0509266	0.0686297	0.0585566	-0.201552	1	2
cg13985518	7	27143788	rs11974233		HOXA2	NM_006735	TSS1500	chr7:27143181-27143479	S_Shore	ClassA	chr7:27143181-27143479*S_Shore	4	3	1.39424e-12	4.42017e-14	4.01439e-10	7.94778e-11	0.487905	0.699037	0.689371	0.0546393	0.0703833	0.0432383	-0.201466	1	2
cg10319053	7	27143370			HOXA2	NM_006735	TSS1500	chr7:27143181-27143479	Island	ClassA	chr7:27143181-27143479*Island	7	7	2.11987e-15	1.11733e-14	1.56294e-12	2.5906e-11	0.241379	0.457228	0.442777	0.0425286	0.0869073	0.0506997	-0.201399	1	2
cg19432993	7	27143287			HOXA2	NM_006735	TSS1500	chr7:27143181-27143479	Island	ClassA	chr7:27143181-27143479*Island	7	7	2.11987e-15	1.41273e-16	1.56294e-12	7.64375e-13	0.359134	0.569198	0.556365	0.0428308	0.0767707	0.0476305	-0.197232	1	2
cg22679406	6	29599331			GABBR1;GABBR1	NM_021904;NM_001470	Body;Body	chr6:29600192-29600661	N_Shore	ClassA	chr6:29600192-29600661*N_Shore	23	22	5.90125e-12	2.23752e-11	1.48765e-09	1.60275e-08	0.459385	0.636432	0.65381	0.0483583	0.070793	0.0560697	-0.194425	1	2
cg06885459	13	113689728	rs74680370		MCF2L;MCF2L	NM_001112732;NM_024979	Body;Body	chr13:113687421-113687828	S_Shore	ClassA	chr13:113687421-113687828*S_Shore	8	7	3.88876e-18	1.43127e-15	1.2459e-14	4.77797e-12	0.277111	0.441333	0.470287	0.0449729	0.0672641	0.0500149	-0.193176	1	2
cg24807850	1	3165391			PRDM16;PRDM16	NM_022114;NM_199454	Body;Body	chr1:3163969-3164643	S_Shore	ClassA	chr1:3163969-3164643*S_Shore	3	3	2.31341e-14	1.05538e-12	1.17818e-11	1.20759e-09	0.557816	0.708603	0.747428	0.0539869	0.0538556	0.0362928	-0.189612	1	2
cg14220678	1	46089024		rs34276866	CCDC17	NM_001114938	Body	chr1:46088194-46089142	Island	ClassA	chr1:46088194-46089142*Island	5	4	7.37008e-07	3.41981e-06	2.93688e-05	0.000362798	0.687039	0.89967	0.876146	0.136001	0.0541049	0.061869	-0.189108	1	2
cg00445443	7	27143478			HOXA2	NM_006735	TSS1500	chr7:27143181-27143479	Island	ClassA	chr7:27143181-27143479*Island	7	7	2.11987e-15	8.151e-15	1.56294e-12	1.99486e-11	0.18467	0.386023	0.372204	0.0444686	0.0680575	0.040865	-0.187534	1	2
cg24670715	8	6420506			ANGPT2;ANGPT2;ANGPT2;ANGPT2;ANGPT2;ANGPT2;MCPH1	NM_001118888;NM_001147;NM_001118887;NM_001118888;NM_001147;NM_001118887;NM_024596	5'UTR;1stExon;5'UTR;1stExon;5'UTR;1stExon;Body	chr8:6424215-6424888	N_Shelf	ClassA	chr8:6424215-6424888*N_Shelf	7	7	1.85352e-08	1.32611e-09	1.31751e-06	5.10209e-07	0.522491	0.703904	0.705584	0.0837741	0.0562545	0.0463924	-0.183093	1	2
cg06519422	6	29599226			GABBR1;GABBR1	NM_021904;NM_001470	Body;Body	chr6:29600192-29600661	N_Shore	ClassA	chr6:29600192-29600661*N_Shore	23	22	5.90125e-12	1.62131e-11	1.48765e-09	1.24615e-08	0.471571	0.633779	0.652562	0.0424254	0.0591118	0.055211	-0.180991	1	2
cg03335125	1	46088541			CCDC17	NM_001114938	Body	chr1:46088194-46089142	Island	ClassA	chr1:46088194-46089142*Island	5	4	7.37008e-07	3.30451e-08	2.93688e-05	7.66173e-06	0.72279	0.916206	0.900698	0.0948125	0.0641595	0.0621039	-0.177908	1	2
cg02102533	16	57562841			CCDC102A	NM_033212	Body	chr16:57562451-57563325	Island	ClassA	chr16:57562451-57563325*Island	4	4	9.88546e-06	0.00486934	0.000259331	0.100476	0.621939	0.816102	0.798803	0.107559	0.109982	0.105291	-0.176863	1	2
cg05713794	3	194119861			GP5	NM_004488	5'UTR	chr3:194117601-194118988	S_Shore	ClassA	chr3:194117601-194118988*S_Shore	7	7	5.99244e-18	2.61094e-14	1.40208e-14	5.11195e-11	0.657476	0.812415	0.832417	0.0608096	0.040549	0.0243881	-0.174941	1	2
cg02548132	8	6420242			ANGPT2;ANGPT2;ANGPT2;MCPH1	NM_001147;NM_001118888;NM_001118887;NM_024596	1stExon;1stExon;1stExon;Body	chr8:6424215-6424888	N_Shelf	ClassA	chr8:6424215-6424888*N_Shelf	7	7	1.85352e-08	2.78695e-07	1.31751e-06	4.58535e-05	0.763199	0.943761	0.936497	0.110796	0.0361518	0.0330194	-0.173298	1	2
cg03127104	6	29599250			GABBR1;GABBR1	NM_021904;NM_001470	Body;Body	chr6:29600192-29600661	N_Shore	ClassA	chr6:29600192-29600661*N_Shore	23	22	5.90125e-12	4.47617e-12	1.48765e-09	4.17328e-09	0.413366	0.56675	0.586598	0.039132	0.0639951	0.0540585	-0.173231	1	2
cg08611810	2	54087178			LOC100302652;GPR75	NM_001164165;NM_006794	TSS200;TSS200	chr2:54086776-54087266	Island	ClassA	chr2:54086776-54087266*Island	10	9	2.04555e-15	3.11824e-14	1.55366e-12	5.90825e-11	0.707474	0.891078	0.879024	0.0501075	0.0620556	0.0366657	-0.17155	1	2
cg19284039	11	2292895			ASCL2	NM_005170	TSS1500	chr11:2290104-2292932	Island	ClassA	chr11:2290104-2292932*Island	31	29	0.000185756	1.68924e-05	0.00285472	0.00134299	0.498742	0.71271	0.669091	0.101053	0.106103	0.1082	-0.170349	1	2
cg22165106	7	1782220			ELFN1	NM_001128636	5'UTR	chr7:1784027-1786934	N_Shore	ClassA	chr7:1784027-1786934*N_Shore	8	8	2.15831e-11	1.08156e-10	4.3765e-09	6.06952e-08	0.435216	0.574441	0.605512	0.0517366	0.0473344	0.0448919	-0.170295	1	2
cg19878627	2	54087184			LOC100302652;GPR75	NM_001164165;NM_006794	TSS200;TSS200	chr2:54086776-54087266	Island	ClassA	chr2:54086776-54087266*Island	10	9	2.04555e-15	5.61661e-15	1.55366e-12	1.45545e-11	0.713892	0.900639	0.884064	0.0397988	0.0653856	0.0404848	-0.170172	1	2
cg17179862	17	46681362			LOC404266;LOC404266;HOXB6	NR_033204;NR_033201;NM_018952	Body;Body;5'UTR	chr17:46685244-46685449	N_Shelf	ClassA	chr17:46685244-46685449*N_Shelf	10	10	1.52057e-08	2.40421e-06	1.12438e-06	0.000271395	0.359669	0.530074	0.529312	0.087524	0.0988067	0.0794117	-0.169643	1	2
cg05414908	2	54087173			LOC100302652;GPR75	NM_001164165;NM_006794	TSS200;TSS200	chr2:54086776-54087266	Island	ClassA	chr2:54086776-54087266*Island	10	9	2.04555e-15	2.00223e-14	1.55366e-12	4.20018e-11	0.711784	0.896658	0.879658	0.0435606	0.0652995	0.0413799	-0.167874	1	2
cg20191338	18	77905663			LOC100130522;LOC100130522	NR_028339;NR_028340	TSS200;TSS200	chr18:77905297-77905566	S_Shore	ClassA	chr18:77905297-77905566*S_Shore	5	5	0.000185082	2.27895e-05	0.00285472	0.00171394	0.140478	0.284795	0.306004	0.0666554	0.095699	0.0641767	-0.165526	1	2
cg05251669	18	77905391			LOC100130522;LOC100130522	NR_028339;NR_028340	TSS1500;TSS1500	chr18:77905297-77905566	Island	ClassA	chr18:77905297-77905566*Island	5	3	0.00011783	4.19029e-06	0.00200704	0.00042854	0.107254	0.254669	0.27035	0.0588805	0.0960129	0.061617	-0.163096	1	2
cg06092953	18	77905699			LOC100130522;LOC100130522	NR_028339;NR_028340	TSS200;TSS200	chr18:77905297-77905566	S_Shore	ClassA	chr18:77905297-77905566*S_Shore	5	5	0.000185082	0.000102192	0.00285472	0.00564141	0.111991	0.259213	0.270406	0.0604978	0.0934781	0.0732517	-0.158415	1	2
cg26051413	11	2292902			ASCL2	NM_005170	TSS1500	chr11:2290104-2292932	Island	ClassA	chr11:2290104-2292932*Island	31	29	0.000185756	0.000204962	0.00285472	0.00972967	0.332368	0.545583	0.489995	0.0883478	0.11733	0.122847	-0.157627	1	2
cg03803541	17	46681401			LOC404266;LOC404266;HOXB6	NR_033204;NR_033201;NM_018952	Body;Body;5'UTR	chr17:46685244-46685449	N_Shelf	ClassA	chr17:46685244-46685449*N_Shelf	10	10	1.52057e-08	1.57612e-06	1.12438e-06	0.000192868	0.367671	0.526544	0.524975	0.0694208	0.0839347	0.0835811	-0.157303	1	2
cg01765653	6	29599160			GABBR1;GABBR1	NM_021904;NM_001470	Body;Body	chr6:29600192-29600661	N_Shore	ClassA	chr6:29600192-29600661*N_Shore	23	22	5.90125e-12	3.12323e-13	1.48765e-09	4.10707e-10	0.389593	0.523947	0.546817	0.0347411	0.0509837	0.0422583	-0.157224	1	2
cg06687305	1	46088486			CCDC17	NM_001114938	Body	chr1:46088194-46089142	Island	ClassA	chr1:46088194-46089142*Island	5	4	7.37008e-07	3.18413e-07	2.93688e-05	5.15224e-05	0.541942	0.71284	0.69824	0.100655	0.0538823	0.0496293	-0.156298	1	2
cg16737533	18	77905355			LOC100130522;LOC100130522	NR_028339;NR_028340	TSS1500;TSS1500	chr18:77905297-77905566	Island	ClassA	chr18:77905297-77905566*Island	5	3	0.00011783	6.48618e-05	0.00200704	0.0039589	0.248776	0.380326	0.402845	0.0906621	0.0977432	0.0362217	-0.15407	1	2
cg01899620	13	113689422			MCF2L;MCF2L	NM_001112732;NM_024979	Body;Body	chr13:113687421-113687828	S_Shore	ClassA	chr13:113687421-113687828*S_Shore	8	7	3.88876e-18	2.0307e-07	1.2459e-14	3.50471e-05	0.343216	0.452533	0.496876	0.054761	0.0686212	0.0547696	-0.15366	1	2
cg10403849	10	70321959			TET1	NM_030625	5'UTR	chr10:70320130-70320822	S_Shore	ClassA	chr10:70320130-70320822*S_Shore	11	10	2.76638e-08	1.63712e-06	1.8264e-06	0.000199225	0.255146	0.401646	0.406842	0.0698945	0.0806535	0.0652028	-0.151696	1	2
cg06373870	4	81117853			PRDM8;PRDM8	NM_001099403;NM_020226	TSS1500;5'UTR	chr4:81118137-81118603	N_Shore	ClassA	chr4:81118137-81118603*N_Shore	4	4	0.000843036	8.4342e-05	0.0092909	0.00489146	0.532236	0.3517	0.381522	0.0997293	0.0585919	0.0666189	0.150713	1	2
cg05076221	7	27182637			HOXA5	NM_019102	Body	chr7:27182613-27185562	Island	ClassA	chr7:27182613-27185562*Island	50	46	2.02318e-10	0.000111705	3.06278e-08	0.0060621	0.59778	0.466387	0.446979	0.0940422	0.0987735	0.072576	0.150801	1	2
cg09014329	17	42431748			FAM171A2	NM_198475	Body	chr17:42431092-42432555	Island	ClassA	chr17:42431092-42432555*Island	7	7	1.91297e-11	1.18241e-08	3.97464e-09	3.16166e-06	0.505079	0.422238	0.353141	0.0650974	0.082669	0.040048	0.151938	1	2
cg20783319	11	112831681			NCAM1;NCAM1;NCAM1	NM_001076682;NM_181351;NM_000615	TSS1500;TSS1500;TSS1500	chr11:112832524-112834490	N_Shore	ClassA	chr11:112832524-112834490*N_Shore	13	13	2.65939e-11	1.13574e-11	5.15527e-09	9.35185e-09	0.338687	0.214657	0.186721	0.0528189	0.0628786	0.0387907	0.151965	1	2
cg21727486	11	112831501			NCAM1;NCAM1;NCAM1	NM_001076682;NM_181351;NM_000615	TSS1500;TSS1500;TSS1500	chr11:112832524-112834490	N_Shore	ClassA	chr11:112832524-112834490*N_Shore	13	13	2.65939e-11	1.12233e-09	5.15527e-09	4.4046e-07	0.426978	0.300383	0.27392	0.0478661	0.086745	0.0491658	0.153058	1	2
cg26162794	17	18528568	rs2649525		CCDC144B	NM_182568	1stExon	chr17:18528376-18528714	Island	ClassA	chr17:18528376-18528714*Island	3	3	6.41745e-09	1.58398e-10	5.39516e-07	8.43249e-08	0.890865	0.750428	0.736632	0.0539956	0.0858823	0.0805735	0.154233	1	2
cg04316233	17	16593613			CCDC144A	NM_014695	TSS200	chr17:16592835-16594147	Island	ClassA	chr17:16592835-16594147*Island	10	10	1.53405e-05	2.22153e-06	0.000375961	0.00025337	0.826948	0.710015	0.672279	0.0984722	0.15669	0.115139	0.15467	1	2
cg25307665	7	27183694			HOXA5	NM_019102	TSS1500	chr7:27182613-27185562	Island	ClassA	chr7:27182613-27185562*Island	50	46	2.02318e-10	0.0137821	3.06278e-08	0.199602	0.701726	0.564834	0.546355	0.112723	0.134262	0.12322	0.155371	1	2
cg07599786	1	201618654			NAV1	NM_020443	Body	chr1:201617041-201619788	Island	ClassA	chr1:201617041-201619788*Island	15	13	7.60848e-05	4.91338e-05	0.00141022	0.00316676	0.707594	0.567083	0.550785	0.105589	0.106903	0.0806168	0.156809	1	2
cg02005600	7	27183686			HOXA5	NM_019102	TSS1500	chr7:27182613-27185562	Island	ClassA	chr7:27182613-27185562*Island	50	46	2.02318e-10	0.00154288	3.06278e-08	0.044856	0.734605	0.594191	0.577415	0.094986	0.129893	0.106407	0.157189	1	2
cg22163199	1	228297864			MRPL55;MRPL55;MRPL55;MRPL55;MRPL55;MRPL55;MRPL55;MRPL55	NM_181441;NM_181464;NM_181456;NM_181465;NM_181462;NM_181455;NM_181454;NM_181463	TSS1500;TSS1500;TSS1500;TSS1500;TSS1500;TSS1500;TSS1500;TSS1500	chr1:228296787-228297276	S_Shore	ClassA	chr1:228296787-228297276*S_Shore	4	4	7.76248e-11	6.21289e-06	1.32799e-08	0.000595927	0.439997	0.264468	0.282435	0.0736718	0.0794655	0.0690014	0.157562	1	2
cg02773588	3	48698519			CELSR3	NM_001407	1stExon	chr3:48698335-48701667	Island	ClassA	chr3:48698335-48701667*Island	20	20	6.61708e-10	2.57013e-09	8.34647e-08	8.91507e-07	0.929671	0.814312	0.770721	0.0331927	0.0699078	0.0628206	0.15895	1	2
cg17624802	17	42431627			FAM171A2	NM_198475	Body	chr17:42431092-42432555	Island	ClassA	chr17:42431092-42432555*Island	7	7	1.91297e-11	3.98891e-10	3.97464e-09	1.86939e-07	0.389159	0.267138	0.229928	0.062851	0.0760293	0.0443398	0.159232	1	2
cg09462576	1	228297873			MRPL55;MRPL55;MRPL55;MRPL55;MRPL55;MRPL55;MRPL55;MRPL55	NM_181441;NM_181464;NM_181456;NM_181465;NM_181462;NM_181455;NM_181454;NM_181463	TSS1500;TSS1500;TSS1500;TSS1500;TSS1500;TSS1500;TSS1500;TSS1500	chr1:228296787-228297276	S_Shore	ClassA	chr1:228296787-228297276*S_Shore	4	4	7.76248e-11	1.02833e-10	1.32799e-08	5.82644e-08	0.675867	0.492736	0.515863	0.0584509	0.0878888	0.0643871	0.160004	1	2
cg05194618	14	45432309			KLHL28;FAM179B	NM_017658;NM_015091	TSS1500;1stExon	chr14:45431628-45432115	S_Shore	ClassA	chr14:45431628-45432115*S_Shore	3	3	7.54719e-06	0.000339868	0.000208775	0.0144554	0.296596	0.138423	0.135899	0.0919133	0.0663415	0.0591622	0.160697	1	2
cg11953245	1	228291591	rs35008895		C1orf35	NM_024319	TSS1500	chr1:228289669-228291184	S_Shore	ClassA	chr1:228289669-228291184*S_Shore	5	4	0.000186936	0.0083964	0.0028688	0.144677	0.473938	0.331619	0.313137	0.115158	0.0998633	0.0823478	0.160801	1	2
cg26811705	11	118781408			BCL9L;BCL9L	NM_182557;NM_182557	1stExon;5'UTR	chr11:118781060-118781732	Island	ClassA	chr11:118781060-118781732*Island	7	7	8.2762e-15	2.40793e-12	5.34197e-12	2.43853e-09	0.55448	0.431679	0.393254	0.0283773	0.0578639	0.0563083	0.161226	1	2
cg21096966	14	45432458			KLHL28;FAM179B	NM_017658;NM_015091	TSS1500;1stExon	chr14:45431628-45432115	S_Shore	ClassA	chr14:45431628-45432115*S_Shore	3	3	7.54719e-06	3.78443e-07	0.000208775	5.98079e-05	0.580878	0.398794	0.419434	0.0849617	0.0734057	0.0441024	0.161444	1	2
cg08476511	6	168435923	rs188938		KIF25;KIF25	NM_005355;NM_030615	Body;Body	chr6:168435835-168436086	Island	ClassA	chr6:168435835-168436086*Island	3	3	0.00136689	0.000172901	0.0135452	0.00850561	0.610676	0.496491	0.448286	0.15268	0.136693	0.13349	0.16239	1	2
cg02524475	4	145566595			HHIP	NM_022475	TSS1500	chr4:145566242-145567413	Island	ClassA	chr4:145566242-145567413*Island	7	7	2.14944e-08	4.03981e-09	1.48707e-06	1.31339e-06	0.541319	0.395782	0.378614	0.0572602	0.0747328	0.0605356	0.162705	1	2
cg05695937	1	201618003			NAV1	NM_020443	1stExon	chr1:201617041-201619788	Island	ClassA	chr1:201617041-201619788*Island	15	13	7.60848e-05	3.4031e-06	0.00141022	0.000361461	0.321338	0.212698	0.158527	0.0881967	0.0745233	0.0643806	0.162811	1	2
cg02248486	7	27183196			HOXA5	NM_019102	1stExon	chr7:27182613-27185562	Island	ClassA	chr7:27182613-27185562*Island	50	46	2.02318e-10	0.000963504	3.06278e-08	0.0318358	0.756263	0.605309	0.593232	0.0783597	0.142835	0.115861	0.163031	1	2
cg03368099	7	27184521			HOXA5	NM_019102	TSS1500	chr7:27182613-27185562	Island	ClassA	chr7:27182613-27185562*Island	50	46	2.02318e-10	7.48521e-05	3.06278e-08	0.00444099	0.664086	0.510924	0.499091	0.0870706	0.0941971	0.0804854	0.164994	1	2
cg05452645	4	81117647			PRDM8;PRDM8	NM_001099403;NM_020226	TSS1500;5'UTR	chr4:81118137-81118603	N_Shore	ClassA	chr4:81118137-81118603*N_Shore	4	4	0.000843036	5.74741e-05	0.0092909	0.00359224	0.652616	0.450743	0.486107	0.112098	0.076399	0.0818763	0.166509	1	2
cg02963119	16	450970			DECR2	NM_020664	TSS1500	chr16:450834-451140	Island	ClassA	chr16:450834-451140*Island	4	4	3.04929e-05	1.11151e-06	0.000667975	0.000143069	0.55645	0.362403	0.388626	0.0835133	0.130941	0.114816	0.167825	1	2
cg11410718	7	27170412			HOXA4	NM_002141	TSS200	chr7:27169572-27170638	Island	ClassA	chr7:27169572-27170638*Island	10	9	0.000240789	2.91852e-05	0.00350254	0.00210248	0.558469	0.411918	0.390133	0.0776782	0.0871646	0.0867567	0.168336	1	2
cg00313914	1	201618901			NAV1	NM_020443	Body	chr1:201617041-201619788	Island	ClassA	chr1:201617041-201619788*Island	15	13	7.60848e-05	0.000129408	0.00141022	0.00679273	0.652453	0.517368	0.483689	0.123253	0.140846	0.103992	0.168765	1	2
cg03434624	12	123380883			VPS37B	NM_024667	TSS200	chr12:123380333-123380894	Island	ClassA	chr12:123380333-123380894*Island	7	7	1.1332e-05	8.63495e-07	0.000289731	0.000115709	0.300575	0.128241	0.131564	0.0971224	0.0533672	0.0475355	0.169011	1	2
cg16054907	22	50706065			MAPK11	NM_002751	Body	chr22:50705406-50706553	Island	ClassA	chr22:50705406-50706553*Island	4	4	1.31537e-14	8.4468e-16	7.62445e-12	3.23569e-12	0.978589	0.815589	0.809123	0.015964	0.0893517	0.0511903	0.169466	1	2
cg13546858	1	869346			SAMD11	NM_152486	Body	chr1:869332-871872	Island	ClassA	chr1:869332-871872*Island	10	9	0.000420014	0.0106133	0.00542723	0.168866	0.583008	0.4538	0.411754	0.139421	0.114131	0.0787316	0.171255	1	2
cg10914467	6	31939224			STK19;STK19;DOM3Z;STK19	NM_032454;NM_004197;NM_005510;NR_026717	TSS1500;TSS1500;Body;Body	chr6:31939730-31940559	N_Shore	ClassA	chr6:31939730-31940559*N_Shore	34	31	4.59744e-16	1.70825e-13	4.73754e-13	2.49961e-10	0.574609	0.409167	0.403212	0.0603857	0.066617	0.0476661	0.171397	1	2
cg07318204	4	145566441			HHIP	NM_022475	TSS1500	chr4:145566242-145567413	Island	ClassA	chr4:145566242-145567413*Island	7	7	2.14944e-08	1.05206e-07	1.48707e-06	1.99769e-05	0.900624	0.755439	0.728931	0.0403703	0.113029	0.082594	0.171692	1	2
cg17662683	6	32064146	rs76156983		TNXB	NM_019105	Body	chr6:32063533-32065044	Island	ClassA	chr6:32063533-32065044*Island	51	43	0.000104028	0.0121009	0.00180139	0.183677	0.488258	0.333753	0.315771	0.0943703	0.128596	0.0937673	0.172487	1	2
cg12679760	1	36786615			C1orf113;C1orf113	NM_024676;NM_001162530	Body;Body	chr1:36786500-36789402	Island	ClassA	chr1:36786500-36789402*Island	10	9	5.00982e-17	1.58166e-12	7.26558e-14	1.70985e-09	0.26189	0.0964489	0.0893277	0.0602034	0.0192114	0.0212393	0.172562	1	2
cg00660989	14	45432516			KLHL28;FAM179B	NM_017658;NM_015091	TSS1500;1stExon	chr14:45431628-45432115	S_Shore	ClassA	chr14:45431628-45432115*S_Shore	3	3	7.54719e-06	1.04707e-06	0.000208775	0.000136166	0.455582	0.256458	0.282963	0.0917121	0.0686774	0.0516189	0.17262	1	2
cg24882324	6	32064508	rs9380279		TNXB	NM_019105	Body	chr6:32063533-32065044	Island	ClassA	chr6:32063533-32065044*Island	51	43	0.000104028	0.00277502	0.00180139	0.0678303	0.270865	0.130001	0.0972346	0.124271	0.0626125	0.0550627	0.173631	1	2
cg11669516	2	217501092			IGFBP2	NM_000597	Body	chr2:217497811-217498847	S_Shelf	ClassA	chr2:217497811-217498847*S_Shelf	3	3	7.97105e-09	2.56426e-09	6.49163e-07	8.91226e-07	0.877797	0.701727	0.704066	0.0424937	0.0771977	0.0748081	0.173731	1	2
cg18073471	4	81119198			PRDM8;PRDM8	NM_020226;NM_001099403	5'UTR;5'UTR	chr4:81119095-81119391	Island	ClassA	chr4:81119095-81119391*Island	4	4	0.00115517	0.000226839	0.0118648	0.0105689	0.371722	0.194991	0.197631	0.108495	0.0457484	0.0688253	0.174091	1	2
cg26365998	12	119772364			CCDC60	NM_178499	TSS200	chr12:119772353-119772594	Island	ClassA	chr12:119772353-119772594*Island	5	5	4.21063e-14	4.54187e-16	1.82749e-11	1.95202e-12	0.398437	0.239161	0.223502	0.0470925	0.0356218	0.0269578	0.174935	1	2
cg07317062	7	27170388			HOXA4;HOXA4	NM_002141;NM_002141	5'UTR;1stExon	chr7:27169572-27170638	Island	ClassA	chr7:27169572-27170638*Island	10	9	0.000240789	6.90598e-05	0.00350254	0.00415327	0.520403	0.365419	0.343343	0.0813543	0.0996687	0.092897	0.177061	1	2
cg01746241	9	34370835			KIAA1161	NM_020702	Body	chr9:34370773-34372902	Island	ClassA	chr9:34370773-34372902*Island	8	7	6.58676e-13	1.76934e-13	2.12965e-10	2.54835e-10	0.826417	0.673597	0.648557	0.0315588	0.107353	0.0578399	0.177861	1	2
cg13400512	6	32064578			TNXB	NM_019105	Body	chr6:32063533-32065044	Island	ClassA	chr6:32063533-32065044*Island	51	43	0.000104028	0.00501046	0.00180139	0.102496	0.393432	0.246785	0.215439	0.117344	0.082299	0.0690253	0.177993	1	2
cg24652615	6	44243304			TMEM151B	NM_001137560	Body	chr6:44243085-44244481	Island	ClassA	chr6:44243085-44244481*Island	5	5	0.00130375	9.37599e-05	0.0130494	0.00530046	0.907405	0.798398	0.729249	0.0619394	0.108105	0.14394	0.178157	1	2
cg06634460	12	123380891			VPS37B	NM_024667	TSS200	chr12:123380333-123380894	Island	ClassA	chr12:123380333-123380894*Island	7	7	1.1332e-05	6.13369e-07	0.000289731	8.82538e-05	0.436784	0.25183	0.258391	0.0818075	0.0714278	0.0621197	0.178393	1	2
cg10848724	12	123380878			VPS37B	NM_024667	TSS200	chr12:123380333-123380894	Island	ClassA	chr12:123380333-123380894*Island	7	7	1.1332e-05	7.70907e-07	0.000289731	0.000106127	0.340125	0.154534	0.16169	0.081719	0.0545501	0.0536349	0.178435	1	2
cg00230502	12	119772381			CCDC60	NM_178499	TSS200	chr12:119772353-119772594	Island	ClassA	chr12:119772353-119772594*Island	5	5	4.21063e-14	7.85372e-15	1.82749e-11	1.94917e-11	0.326164	0.167832	0.147632	0.0534705	0.0330995	0.0209409	0.178532	1	2
cg02439789	1	871441			SAMD11	NM_152486	Body	chr1:869332-871872	Island	ClassA	chr1:869332-871872*Island	10	9	0.000420014	9.61965e-05	0.00542723	0.00539322	0.596335	0.440974	0.417757	0.0847383	0.119328	0.0756518	0.178578	1	2
cg00138041	4	81117665			PRDM8;PRDM8	NM_001099403;NM_020226	TSS1500;5'UTR	chr4:81118137-81118603	N_Shore	ClassA	chr4:81118137-81118603*N_Shore	4	4	0.000843036	0.000133579	0.0092909	0.00696189	0.733746	0.515444	0.555066	0.115853	0.0868558	0.0910899	0.17868	1	2
cg02498063	12	119772577			CCDC60;CCDC60	NM_178499;NM_178499	5'UTR;1stExon	chr12:119772353-119772594	Island	ClassA	chr12:119772353-119772594*Island	5	5	4.21063e-14	5.18175e-13	1.82749e-11	6.46448e-10	0.573806	0.423911	0.394285	0.04414	0.0678162	0.0443483	0.179521	1	2
cg13692836	1	869368			SAMD11	NM_152486	Body	chr1:869332-871872	Island	ClassA	chr1:869332-871872*Island	10	9	0.000420014	6.0058e-05	0.00542723	0.0037159	0.529049	0.386917	0.349429	0.114307	0.116894	0.0604638	0.17962	1	2
cg03049249	17	16593601			CCDC144A	NM_014695	TSS200	chr17:16592835-16594147	Island	ClassA	chr17:16592835-16594147*Island	10	10	1.53405e-05	1.3391e-06	0.000375961	0.000168306	0.673193	0.530814	0.492873	0.106219	0.146488	0.118134	0.180319	1	2
cg24510518	8	144358898	rs61732223		GLI4	NM_138465	Body	chr8:144357997-144359075	Island	ClassA	chr8:144357997-144359075*Island	4	4	2.19453e-06	8.23489e-07	7.53458e-05	0.000111621	0.443968	0.23738	0.26326	0.0622182	0.0952881	0.0818832	0.180708	1	2
cg05542681	16	744328			FBXL16	NM_153350	Body	chr16:743924-745943	Island	ClassA	chr16:743924-745943*Island	10	10	3.30002e-06	0.000771804	0.000105249	0.027054	0.263951	0.187503	0.0832237	0.132665	0.103724	0.0623186	0.180727	1	2
cg02458885	4	81119249		rs77309759	PRDM8;PRDM8	NM_020226;NM_001099403	5'UTR;5'UTR	chr4:81119095-81119391	Island	ClassA	chr4:81119095-81119391*Island	4	4	0.00115517	0.000427027	0.0118648	0.017121	0.391835	0.195441	0.210222	0.142176	0.0418795	0.0712583	0.181613	1	2
cg05210804	6	33282896	rs61734030		ZBTB22;TAPBP;TAPBP;TAPBP;ZBTB22	NM_005453;NM_003190;NM_172208;NM_172209;NM_001145338	Body;TSS1500;TSS1500;TSS1500;Body	chr6:33282855-33283196	Island	ClassA	chr6:33282855-33283196*Island	21	19	1.3287e-12	4.89427e-08	3.84451e-10	1.06079e-05	0.505955	0.347421	0.324127	0.0720657	0.070884	0.0534735	0.181828	1	2
cg05857996	20	2675418			EBF4	NM_001110514	Body	chr20:2672904-2674698	S_Shore	ClassA	chr20:2672904-2674698*S_Shore	4	3	5.79157e-10	3.10739e-06	7.55394e-08	0.000334284	0.951035	0.803842	0.768088	0.0249774	0.12047	0.124115	0.182947	1	2
cg20996351	1	27687232	rs55869163	rs56359841	MAP3K6	NM_004672	Body	chr1:27687024-27687743	Island	ClassA	chr1:27687024-27687743*Island	5	5	1.82165e-08	6.06438e-10	1.30221e-06	2.65824e-07	0.270052	0.108625	0.0868508	0.0665944	0.0396963	0.0341853	0.183202	1	2
cg10531725	17	45924888			SP6	NM_199262	Body	chr17:45924598-45925807	Island	ClassA	chr17:45924598-45925807*Island	4	4	2.80669e-07	2.35064e-08	1.28359e-05	5.7529e-06	0.451108	0.309075	0.267868	0.087677	0.0822722	0.0535585	0.18324	1	2
cg19037007	20	741798	rs910857		C20orf54	NM_033409	Body	chr20:741633-742058	Island	ClassA	chr20:741633-742058*Island	3	3	1.39147e-07	3.60098e-07	7.17988e-06	5.71136e-05	0.551818	0.415801	0.368377	0.0664012	0.0746287	0.05998	0.183441	1	2
cg03556669	6	32064497	rs9380279		TNXB	NM_019105	Body	chr6:32063533-32065044	Island	ClassA	chr6:32063533-32065044*Island	51	43	0.000104028	0.00106398	0.00180139	0.0341938	0.352296	0.210633	0.167324	0.11887	0.0775036	0.0606645	0.184972	1	2
cg15720832	1	228291682			C1orf35	NM_024319	TSS1500	chr1:228289669-228291184	S_Shore	ClassA	chr1:228289669-228291184*S_Shore	5	4	0.000186936	1.32708e-05	0.0028688	0.00110422	0.806531	0.645291	0.621519	0.0838496	0.123109	0.0703196	0.185012	1	2
cg20366479	2	217501125			IGFBP2	NM_000597	Body	chr2:217497811-217498847	S_Shelf	ClassA	chr2:217497811-217498847*S_Shelf	3	3	7.97105e-09	5.06403e-10	6.49163e-07	2.30578e-07	0.650461	0.467331	0.465375	0.0620383	0.06945	0.0743151	0.185086	1	2
cg01745539	6	32632331	rs9274339	rs28746785	HLA-DQB1	NM_002123	Body	chr6:32632158-32633027	Island	ClassA	chr6:32632158-32633027*Island	23	20	0.00267023	0.0253752	0.0223008	0.287836	0.387773	0.205411	0.20243	0.277398	0.193877	0.158278	0.185343	1	2
cg04149916	6	31939319			STK19;STK19;DOM3Z;STK19	NM_032454;NM_004197;NM_005510;NR_026717	TSS1500;TSS1500;Body;Body	chr6:31939730-31940559	N_Shore	ClassA	chr6:31939730-31940559*N_Shore	34	31	4.59744e-16	9.26487e-15	4.73754e-13	2.20618e-11	0.517739	0.331468	0.331605	0.0548773	0.086684	0.0497326	0.186135	1	2
cg07895437	6	33282971			ZBTB22;TAPBP;TAPBP;TAPBP;ZBTB22	NM_005453;NM_003190;NM_172208;NM_172209;NM_001145338	Body;TSS1500;TSS1500;TSS1500;Body	chr6:33282855-33283196	Island	ClassA	chr6:33282855-33283196*Island	21	19	1.3287e-12	4.20045e-08	3.84451e-10	9.3343e-06	0.57422	0.389952	0.387142	0.0771834	0.0716878	0.0611363	0.187079	1	2
cg06821199	4	779230			CPLX1	NM_006651	3'UTR	chr4:778661-780592	Island	ClassA	chr4:778661-780592*Island	10	10	9.74796e-06	0.000102714	0.00025823	0.00566261	0.433223	0.305714	0.245406	0.132105	0.0792938	0.0663421	0.187817	1	2
cg20995835	17	18528589	rs34925025	rs2649525	CCDC144B	NM_182568	1stExon	chr17:18528376-18528714	Island	ClassA	chr17:18528376-18528714*Island	3	3	6.41745e-09	4.03779e-08	5.39516e-07	9.04069e-06	0.758072	0.578862	0.569765	0.0920014	0.127578	0.117475	0.188308	1	2
cg05448404	4	779173			CPLX1	NM_006651	3'UTR	chr4:778661-780592	Island	ClassA	chr4:778661-780592*Island	10	10	9.74796e-06	7.36317e-07	0.00025823	0.000102324	0.362964	0.21791	0.174045	0.106401	0.0764618	0.0390026	0.188919	1	2
cg04142955	6	31939181			STK19;STK19;DOM3Z;STK19	NM_032454;NM_004197;NM_005510;NR_026717	TSS1500;TSS1500;Body;Body	chr6:31939730-31940559	N_Shore	ClassA	chr6:31939730-31940559*N_Shore	34	31	4.59744e-16	1.79747e-13	4.73754e-13	2.55431e-10	0.726476	0.537402	0.535392	0.059713	0.0686442	0.0412488	0.191084	1	2
cg11742103	11	62369870			EML3;MTA2	NM_153265;NM_004739	3'UTR;TSS1500	chr11:62368454-62370491	Island	ClassA	chr11:62368454-62370491*Island	12	10	6.53029e-08	6.60885e-08	3.7815e-06	1.35413e-05	0.430469	0.259198	0.239375	0.0838421	0.118733	0.0927726	0.191093	1	2
cg13577505	22	50706248			MAPK11	NM_002751	Body	chr22:50705406-50706553	Island	ClassA	chr22:50705406-50706553*Island	4	4	1.31537e-14	1.93416e-11	7.62445e-12	1.41419e-08	0.370484	0.172606	0.178758	0.0673871	0.0727222	0.0665214	0.191726	1	2
cg13735469	8	144810657			FAM83H	NM_198488	Body	chr8:144808221-144810978	Island	ClassA	chr8:144808221-144810978*Island	8	7	1.75088e-13	4.2368e-05	6.75107e-11	0.00281938	0.640863	0.439015	0.449057	0.101164	0.133685	0.0714132	0.191805	1	2
cg27502912	22	51017001			CPT1B;CPT1B;CPT1B;CPT1B;CHKB-CPT1B;CPT1B;CPT1B;CPT1B;CPT1B;CPT1B;CPT1B;CPT1B	NM_152245;NM_001145137;NM_001145136;NM_001145135;NR_027928;NM_001145134;NM_152245;NM_004377;NM_152246;NM_001145135;NM_001145136;NM_001145134	1stExon;TSS1500;1stExon;5'UTR;Body;1stExon;5'UTR;TSS200;TSS200;1stExon;5'UTR;5'UTR	chr22:51016253-51017020	Island	ClassA	chr22:51016253-51017020*Island	10	10	3.088e-12	5.58862e-08	8.37138e-10	1.18505e-05	0.780653	0.622559	0.588528	0.0735407	0.0559135	0.059131	0.192125	1	2
cg04179952	1	201619295			NAV1	NM_020443	Body	chr1:201617041-201619788	Island	ClassA	chr1:201617041-201619788*Island	15	13	7.60848e-05	8.32903e-06	0.00141022	0.000756529	0.518941	0.349411	0.325821	0.135194	0.125463	0.101466	0.19312	1	2
cg19759481	7	27183401			HOXA5	NM_019102	TSS200	chr7:27182613-27185562	Island	ClassA	chr7:27182613-27185562*Island	50	46	2.02318e-10	0.000858769	3.06278e-08	0.0292415	0.74051	0.565741	0.547219	0.0872079	0.158773	0.127582	0.193291	1	2
cg01399317	8	144810339			FAM83H	NM_198488	Body	chr8:144808221-144810978	Island	ClassA	chr8:144808221-144810978*Island	8	7	1.75088e-13	1.86609e-06	6.75107e-11	0.00022173	0.711511	0.513781	0.517223	0.0997258	0.0977956	0.0506019	0.194288	1	2
cg17569124	7	27183643			HOXA5	NM_019102	TSS1500	chr7:27182613-27185562	Island	ClassA	chr7:27182613-27185562*Island	50	46	2.02318e-10	0.000184356	3.06278e-08	0.00894674	0.662484	0.485206	0.466878	0.11196	0.142152	0.109606	0.195606	1	2
cg02156899	16	2029256			NOXO1;NOXO1;NOXO1	NM_172167;NM_144603;NM_172168	Body;Body;Body	chr16:2028987-2030710	Island	ClassA	chr16:2028987-2030710*Island	6	6	1.003e-16	1.43349e-11	1.29955e-13	1.14297e-08	0.789666	0.608074	0.593881	0.0676068	0.0533783	0.0420525	0.195785	1	2
cg04863892	7	27183375			HOXA5	NM_019102	TSS200	chr7:27182613-27185562	Island	ClassA	chr7:27182613-27185562*Island	50	46	2.02318e-10	0.000225033	3.06278e-08	0.0105042	0.754598	0.581595	0.558416	0.0864889	0.146674	0.119501	0.196182	1	2
cg00525277	6	32064239	rs56250504		TNXB	NM_019105	Body	chr6:32063533-32065044	Island	ClassA	chr6:32063533-32065044*Island	51	43	0.000104028	0.00990169	0.00180139	0.1613	0.591044	0.437644	0.39427	0.117523	0.127541	0.106535	0.196774	1	2
cg13708645	12	121974305			KDM2B;KDM2B	NM_032590;NM_001005366	Body;Body	chr12:121975028-121976140	N_Shore	ClassA	chr12:121975028-121976140*N_Shore	4	4	9.02765e-18	9.8026e-16	1.80769e-14	3.67516e-12	0.617738	0.42489	0.420693	0.0440813	0.0654844	0.0505376	0.197045	1	2
cg22078805	17	42432046			FAM171A2	NM_198475	Body	chr17:42431092-42432555	Island	ClassA	chr17:42431092-42432555*Island	7	7	1.91297e-11	3.01524e-06	3.97464e-09	0.000326563	0.505817	0.441475	0.30659	0.0899981	0.106871	0.0803328	0.199226	1	2
cg02993069	1	36786777			C1orf113;C1orf113	NM_001162530;NM_024676	3'UTR;3'UTR	chr1:36786500-36789402	Island	ClassA	chr1:36786500-36789402*Island	10	9	5.00982e-17	2.21384e-17	7.26558e-14	2.05317e-13	0.293163	0.0946235	0.0927454	0.0538864	0.017592	0.0228333	0.200417	1	2
cg01287088	5	176827392			PFN3	NM_001029886	1stExon	chr5:176827081-176827754	Island	ClassA	chr5:176827081-176827754*Island	4	3	1.78817e-18	3.64821e-17	6.56447e-15	2.79502e-13	0.895086	0.712702	0.694472	0.037505	0.0816813	0.0391103	0.200614	1	2
cg15196197	6	32064573			TNXB	NM_019105	Body	chr6:32063533-32065044	Island	ClassA	chr6:32063533-32065044*Island	51	43	0.000104028	0.00159382	0.00180139	0.0458529	0.291105	0.118391	0.0901225	0.139685	0.0669385	0.0574051	0.200983	1	2
cg24246628	6	168435914		rs188938	KIF25;KIF25	NM_005355;NM_030615	Body;Body	chr6:168435835-168436086	Island	ClassA	chr6:168435835-168436086*Island	3	3	0.00136689	0.000437057	0.0135452	0.0174124	0.536984	0.381472	0.334134	0.20828	0.194573	0.174426	0.20285	1	2
cg15951870	17	45925060			SP6	NM_199262	Body	chr17:45924598-45925807	Island	ClassA	chr17:45924598-45925807*Island	4	4	2.80669e-07	1.06343e-06	1.28359e-05	0.00013809	0.509499	0.352217	0.305268	0.112419	0.0792863	0.0485379	0.204231	1	2
cg02493211	11	118781633			BCL9L	NM_182557	TSS200	chr11:118781060-118781732	Island	ClassA	chr11:118781060-118781732*Island	7	7	8.2762e-15	6.34654e-12	5.34197e-12	5.6768e-09	0.545841	0.344327	0.339837	0.0657914	0.0649671	0.0464697	0.206004	1	2
cg00602811	2	145278564			ZEB2;ZEB2;ZEB2	NR_033258;NM_014795;NM_001171653	TSS1500;TSS1500;TSS1500	chr2:145281736-145282269	N_Shelf	ClassA	chr2:145281736-145282269*N_Shelf	9	9	4.05765e-13	1.04679e-13	1.34906e-10	1.67687e-10	0.649146	0.342191	0.441941	0.0444045	0.0644968	0.0801974	0.207205	1	2
cg02691325	6	44243682	rs35496358		TMEM151B	NM_001137560	Body	chr6:44243085-44244481	Island	ClassA	chr6:44243085-44244481*Island	5	5	0.00130375	0.0141237	0.0130494	0.202387	0.435045	0.286998	0.22647	0.133754	0.135769	0.108899	0.208575	1	2
cg21493951	6	32632338	rs9274340	rs41263817	HLA-DQB1	NM_002123	Body	chr6:32632158-32633027	Island	ClassA	chr6:32632158-32633027*Island	23	20	0.00267023	0.00520266	0.0223008	0.1051	0.590826	0.380289	0.381987	0.300383	0.226451	0.258867	0.20884	1	2
cg00481259	16	450837			DECR2	NM_020664	TSS1500	chr16:450834-451140	Island	ClassA	chr16:450834-451140*Island	4	4	3.04929e-05	2.16136e-06	0.000667975	0.000248276	0.501376	0.268653	0.291341	0.122642	0.135603	0.102166	0.210035	1	2
cg06035600	1	27687454	rs35659744		MAP3K6	NM_004672	Body	chr1:27687024-27687743	Island	ClassA	chr1:27687024-27687743*Island	5	5	1.82165e-08	3.67095e-08	1.30221e-06	8.33586e-06	0.723072	0.518029	0.512727	0.0716378	0.0770963	0.0657651	0.210345	1	2
cg07925670	17	7253489			ACAP1	NM_014716	Body	chr17:7253298-7253764	Island	ClassA	chr17:7253298-7253764*Island	3	3	9.76624e-07	6.84632e-08	3.78224e-05	1.39629e-05	0.603047	0.384827	0.392531	0.103036	0.0710991	0.0695718	0.210516	1	2
cg27387193	6	32064032			TNXB	NM_019105	Body	chr6:32063533-32065044	Island	ClassA	chr6:32063533-32065044*Island	51	43	0.000104028	0.00395541	0.00180139	0.0868736	0.662882	0.470074	0.452271	0.102134	0.154938	0.114442	0.210611	1	2
cg03223076	3	48698558			CELSR3	NM_001407	1stExon	chr3:48698335-48701667	Island	ClassA	chr3:48698335-48701667*Island	20	20	6.61708e-10	5.21041e-10	8.34647e-08	2.36632e-07	0.709084	0.547095	0.497746	0.0677583	0.0833183	0.0688774	0.211339	1	2
cg26266427	6	32063838			TNXB	NM_019105	Body	chr6:32063533-32065044	Island	ClassA	chr6:32063533-32065044*Island	51	43	0.000104028	9.6782e-05	0.00180139	0.00541471	0.747567	0.573525	0.535843	0.0920053	0.133442	0.0934901	0.211724	1	2
cg03463411	4	81118188			PRDM8;PRDM8	NM_001099403;NM_020226	TSS1500;5'UTR	chr4:81118137-81118603	Island	ClassA	chr4:81118137-81118603*Island	4	4	0.00174999	0.000296021	0.0162179	0.0129729	0.552544	0.309663	0.34002	0.149012	0.0702529	0.083103	0.212524	1	2
cg05337761	1	2121349			C1orf86;LOC100128003;C1orf86	NM_001146310;NR_024445;NM_182533	Body;Body;Body	chr1:2121017-2121818	Island	ClassA	chr1:2121017-2121818*Island	5	4	9.4234e-06	5.11901e-07	0.000251021	7.57368e-05	0.532354	0.351178	0.318336	0.0993648	0.143473	0.0946622	0.214018	1	2
cg15909132	17	42431109			FAM171A2	NM_198475	Body	chr17:42431092-42432555	Island	ClassA	chr17:42431092-42432555*Island	7	7	1.91297e-11	2.42557e-13	3.97464e-09	3.33916e-10	0.61005	0.410523	0.395394	0.0574988	0.118652	0.0499649	0.214656	1	2
cg12128839	7	27183436			HOXA5	NM_019102	TSS200	chr7:27182613-27185562	Island	ClassA	chr7:27182613-27185562*Island	50	46	2.02318e-10	0.000351716	3.06278e-08	0.0148124	0.702869	0.504005	0.487726	0.103883	0.149182	0.124368	0.215143	1	2
cg00270625	22	51017019			CPT1B;CPT1B;CPT1B;CPT1B;CHKB-CPT1B;CPT1B;CPT1B;CPT1B;CPT1B;CPT1B;CPT1B;CPT1B	NM_152245;NM_001145137;NM_001145136;NM_001145135;NR_027928;NM_001145134;NM_152245;NM_004377;NM_152246;NM_001145135;NM_001145136;NM_001145134	1stExon;TSS1500;1stExon;5'UTR;Body;1stExon;5'UTR;TSS200;TSS200;1stExon;5'UTR;5'UTR	chr22:51016253-51017020	Island	ClassA	chr22:51016253-51017020*Island	10	10	3.088e-12	7.10644e-08	8.37138e-10	1.43605e-05	0.917817	0.749452	0.702477	0.0608306	0.0754366	0.0866116	0.21534	1	2
cg14825413	8	144358566			GLI4	NM_138465	Body	chr8:144357997-144359075	Island	ClassA	chr8:144357997-144359075*Island	4	4	2.19453e-06	1.6199e-06	7.53458e-05	0.000197267	0.433904	0.184367	0.218059	0.0928613	0.117284	0.102337	0.215844	1	2
cg26299084	4	81118588			PRDM8;PRDM8	NM_020226;NM_001099403	5'UTR;TSS200	chr4:81118137-81118603	Island	ClassA	chr4:81118137-81118603*Island	4	4	0.00174999	8.68372e-05	0.0162179	0.00499076	0.426354	0.198962	0.209919	0.142217	0.0498304	0.0734925	0.216434	1	2
cg10180404	6	32632334		rs28746785	HLA-DQB1	NM_002123	Body	chr6:32632158-32633027	Island	ClassA	chr6:32632158-32633027*Island	23	20	0.00267023	0.00809307	0.0223008	0.141435	0.52346	0.31078	0.303139	0.264167	0.222671	0.197243	0.220321	1	2
cg08260245	22	51016501			CPT1B;CPT1B;CHKB-CPT1B;CPT1B;CPT1B;CPT1B;CPT1B;CPT1B;CPT1B	NM_152246;NM_001145135;NR_027928;NM_152245;NM_001145137;NM_001145136;NM_001145137;NM_004377;NM_001145134	5'UTR;5'UTR;Body;5'UTR;5'UTR;5'UTR;1stExon;5'UTR;5'UTR	chr22:51016253-51017020	Island	ClassA	chr22:51016253-51017020*Island	10	10	3.088e-12	2.74982e-08	8.37138e-10	6.55681e-06	0.879999	0.695198	0.65362	0.0789025	0.0635285	0.0682424	0.226379	1	2
cg13069441	6	31939322			STK19;STK19;DOM3Z;STK19	NM_032454;NM_004197;NM_005510;NR_026717	TSS1500;TSS1500;Body;Body	chr6:31939730-31940559	N_Shore	ClassA	chr6:31939730-31940559*N_Shore	34	31	4.59744e-16	1.29831e-15	4.73754e-13	4.54919e-12	0.627941	0.412471	0.400872	0.0562444	0.0966652	0.0612784	0.227069	1	2
cg22721579	1	36787932			FAM176B	NM_018166	Body	chr1:36786500-36789402	Island	ClassA	chr1:36786500-36789402*Island	10	9	5.00982e-17	1.05405e-10	7.26558e-14	5.93401e-08	0.685599	0.420531	0.454502	0.0848532	0.0658212	0.0745739	0.231097	1	2
cg27242132	4	81119178			PRDM8;PRDM8	NM_020226;NM_001099403	5'UTR;5'UTR	chr4:81119095-81119391	Island	ClassA	chr4:81119095-81119391*Island	4	4	0.00115517	9.84996e-05	0.0118648	0.00548049	0.424646	0.181628	0.192211	0.155566	0.0496864	0.0866695	0.232435	1	2
cg16834823	6	32064218	rs56250504		TNXB	NM_019105	Body	chr6:32063533-32065044	Island	ClassA	chr6:32063533-32065044*Island	51	43	0.000104028	0.00248222	0.00180139	0.0628891	0.553811	0.371146	0.321084	0.125599	0.142513	0.116541	0.232728	1	2
cg26227225	1	2121039			C1orf86;LOC100128003;C1orf86	NM_001146310;NR_024445;NM_182533	Body;Body;3'UTR	chr1:2121017-2121818	Island	ClassA	chr1:2121017-2121818*Island	5	4	9.4234e-06	1.17992e-06	0.000251021	0.000150336	0.556132	0.377097	0.321423	0.110176	0.166328	0.0925709	0.23471	1	2
cg10890302	6	32064246	rs56250504		TNXB	NM_019105	Body	chr6:32063533-32065044	Island	ClassA	chr6:32063533-32065044*Island	51	43	0.000104028	0.00569619	0.00180139	0.111991	0.4961	0.327102	0.258507	0.139329	0.13755	0.112561	0.237593	1	2
cg01337207	6	32063835			TNXB	NM_019105	Body	chr6:32063533-32065044	Island	ClassA	chr6:32063533-32065044*Island	51	43	0.000104028	0.000109444	0.00180139	0.00596328	0.729549	0.524942	0.489831	0.102606	0.161884	0.104187	0.239718	1	2
cg07973095	16	451040			DECR2	NM_020664	TSS1500	chr16:450834-451140	Island	ClassA	chr16:450834-451140*Island	4	4	3.04929e-05	2.18585e-06	0.000667975	0.000250425	0.440175	0.167124	0.199411	0.147907	0.122739	0.114915	0.240764	1	2
cg01327147	9	34371380			KIAA1161	NM_020702	Body	chr9:34370773-34372902	Island	ClassA	chr9:34370773-34372902*Island	8	7	6.58676e-13	1.62732e-13	2.12965e-10	2.4301e-10	0.879708	0.694495	0.638632	0.0248894	0.121372	0.0843187	0.241076	1	2
cg11959399	20	741723			C20orf54	NM_033409	Body	chr20:741633-742058	Island	ClassA	chr20:741633-742058*Island	3	3	1.39147e-07	9.00332e-06	7.17988e-06	0.00080696	0.606893	0.419418	0.365597	0.0986681	0.0942968	0.0836641	0.241296	1	2
cg01992382	6	32064212			TNXB	NM_019105	Body	chr6:32063533-32065044	Island	ClassA	chr6:32063533-32065044*Island	51	43	0.000104028	0.00169215	0.00180139	0.0479149	0.520679	0.324271	0.279115	0.13097	0.137963	0.103482	0.241563	1	2
cg22857963	8	144358043			GLI4	NM_138465	Body	chr8:144357997-144359075	Island	ClassA	chr8:144357997-144359075*Island	4	4	2.19453e-06	1.35869e-07	7.53458e-05	2.48874e-05	0.463255	0.198704	0.218068	0.101881	0.086175	0.0729867	0.245187	1	2
cg10923662	6	32064258		rs56250504	TNXB	NM_019105	Body	chr6:32063533-32065044	Island	ClassA	chr6:32063533-32065044*Island	51	43	0.000104028	0.0014321	0.00180139	0.042555	0.414473	0.210561	0.169094	0.151964	0.122399	0.101376	0.245379	1	2
cg04599341	16	2029855			NOXO1;NOXO1;NOXO1	NM_172167;NM_144603;NM_172168	Body;Body;Body	chr16:2028987-2030710	Island	ClassA	chr16:2028987-2030710*Island	6	6	1.003e-16	1.01565e-17	1.29955e-13	1.05276e-13	0.662001	0.434659	0.414647	0.052707	0.0420286	0.0411264	0.247355	1	2
cg26995224	12	121974146			KDM2B;KDM2B	NM_032590;NM_001005366	Body;Body	chr12:121975028-121976140	N_Shore	ClassA	chr12:121975028-121976140*N_Shore	4	4	9.02765e-18	9.46378e-20	1.80769e-14	2.08453e-15	0.742346	0.48744	0.487481	0.0370566	0.0875053	0.0494901	0.254865	1	2
cg13298116	11	62369859			EML3;MTA2	NM_153265;NM_004739	3'UTR;TSS1500	chr11:62368454-62370491	Island	ClassA	chr11:62368454-62370491*Island	12	10	6.53029e-08	1.97674e-07	3.7815e-06	3.43176e-05	0.552327	0.325457	0.296809	0.12327	0.176285	0.128917	0.255518	1	2
cg10490842	22	51016604		rs73445517	CPT1B;CPT1B;CPT1B;CHKB-CPT1B;CPT1B;CPT1B;CPT1B;CPT1B	NM_152246;NM_001145135;NM_001145137;NR_027928;NM_152245;NM_001145136;NM_004377;NM_001145134	5'UTR;5'UTR;TSS200;Body;5'UTR;5'UTR;5'UTR;5'UTR	chr22:51016253-51017020	Island	ClassA	chr22:51016253-51017020*Island	10	10	3.088e-12	7.1009e-11	8.37138e-10	4.28513e-08	0.680098	0.465414	0.421155	0.0919338	0.0662869	0.0500645	0.258943	1	2
cg03780927	11	118781150			BCL9L;BCL9L	NM_182557;NM_182557	1stExon;5'UTR	chr11:118781060-118781732	Island	ClassA	chr11:118781060-118781732*Island	7	7	8.2762e-15	6.01216e-17	5.34197e-12	4.07465e-13	0.501958	0.265758	0.241746	0.0593657	0.0614021	0.0473737	0.260212	1	2
cg19409579	4	81118500			PRDM8;PRDM8	NM_020226;NM_001099403	5'UTR;TSS200	chr4:81118137-81118603	Island	ClassA	chr4:81118137-81118603*Island	4	4	0.00174999	0.00018844	0.0162179	0.0091073	0.506722	0.233861	0.242526	0.157862	0.0852967	0.116514	0.264196	1	2
cg10365886	6	32063874	rs41270458		TNXB	NM_019105	Body	chr6:32063533-32065044	Island	ClassA	chr6:32063533-32065044*Island	51	43	0.000104028	0.000231497	0.00180139	0.0107292	0.839069	0.61293	0.571107	0.0972317	0.174716	0.146887	0.267962	1	2
cg15265085	6	32064588			TNXB	NM_019105	Body	chr6:32063533-32065044	Island	ClassA	chr6:32063533-32065044*Island	51	43	0.000104028	9.11012e-05	0.00180139	0.00517673	0.481675	0.262223	0.213389	0.129015	0.10903	0.0836835	0.268287	1	2
cg02676175	17	7253720			KCTD11;ACAP1	NM_001002914;NM_014716	TSS1500;Body	chr17:7253298-7253764	Island	ClassA	chr17:7253298-7253764*Island	3	3	9.76624e-07	2.4948e-06	3.78224e-05	0.000279118	0.777451	0.51043	0.506334	0.139288	0.139402	0.126767	0.271117	1	2
cg27246129	6	170595947			DLL1	NM_005618	Body	chr6:170597246-170597499	N_Shore	ClassA	chr6:170597246-170597499*N_Shore	4	4	5.02526e-07	1.25853e-08	2.1225e-05	3.32984e-06	0.78574	0.513819	0.514176	0.091609	0.121653	0.086761	0.271564	1	2
cg05156901	22	51016646			CPT1B;CPT1B;CPT1B;CHKB-CPT1B;CPT1B;CPT1B;CPT1B;CPT1B	NM_152246;NM_001145135;NM_001145137;NR_027928;NM_152245;NM_001145136;NM_004377;NM_001145134	5'UTR;5'UTR;TSS200;Body;5'UTR;5'UTR;5'UTR;5'UTR	chr22:51016253-51017020	Island	ClassA	chr22:51016253-51017020*Island	10	10	3.088e-12	9.67414e-11	8.37138e-10	5.55273e-08	0.875333	0.663928	0.60176	0.0774377	0.0855542	0.0781194	0.273573	1	2
cg19142026	7	27170394			HOXA4;HOXA4	NM_002141;NM_002141	5'UTR;1stExon	chr7:27169572-27170638	Island	ClassA	chr7:27169572-27170638*Island	10	9	0.000240789	4.47213e-05	0.00350254	0.00293715	0.600695	0.35265	0.325268	0.126943	0.140173	0.132764	0.275426	1	2
cg25468618	8	144810034			FAM83H	NM_198488	Body	chr8:144808221-144810978	Island	ClassA	chr8:144808221-144810978*Island	8	7	1.75088e-13	2.71535e-14	6.75107e-11	5.25796e-11	0.879017	0.625302	0.602029	0.0709613	0.0938392	0.0488529	0.276988	1	2
cg22891070	19	46801642			HIF3A;HIF3A	NM_152795;NM_022462	Body;TSS200	chr19:46800053-46800603	S_Shore	ClassA	chr19:46800053-46800603*S_Shore	3	3	2.60247e-11	1.32609e-11	5.11813e-09	1.07683e-08	0.913498	0.626191	0.634408	0.0517431	0.134153	0.137686	0.27909	1	2
cg06530441	22	51016950			CPT1B;CPT1B;CPT1B;CHKB-CPT1B;CPT1B;CPT1B;CPT1B;CPT1B	NM_152246;NM_001145137;NM_001145135;NR_027928;NM_152245;NM_001145136;NM_001145134;NM_004377	TSS200;TSS1500;5'UTR;Body;5'UTR;5'UTR;5'UTR;TSS200	chr22:51016253-51017020	Island	ClassA	chr22:51016253-51017020*Island	10	10	3.088e-12	8.14413e-12	8.37138e-10	7.05737e-09	0.639453	0.395692	0.357205	0.0847937	0.0642752	0.0716435	0.282248	1	2
cg10146935	1	871308			SAMD11	NM_152486	Body	chr1:869332-871872	Island	ClassA	chr1:869332-871872*Island	10	9	0.000420014	5.89025e-05	0.00542723	0.00365725	0.524923	0.272804	0.242165	0.146065	0.156264	0.105828	0.282759	1	2
cg10770023	22	51016644			CPT1B;CPT1B;CPT1B;CHKB-CPT1B;CPT1B;CPT1B;CPT1B;CPT1B	NM_152246;NM_001145135;NM_001145137;NR_027928;NM_152245;NM_001145136;NM_004377;NM_001145134	5'UTR;5'UTR;TSS200;Body;5'UTR;5'UTR;5'UTR;5'UTR	chr22:51016253-51017020	Island	ClassA	chr22:51016253-51017020*Island	10	10	3.088e-12	3.40536e-09	8.37138e-10	1.13365e-06	0.805322	0.559925	0.519712	0.114315	0.0782028	0.0575924	0.28561	1	2
cg19112186	22	51016638			CPT1B;CPT1B;CPT1B;CHKB-CPT1B;CPT1B;CPT1B;CPT1B;CPT1B	NM_152246;NM_001145135;NM_001145137;NR_027928;NM_152245;NM_001145136;NM_004377;NM_001145134	5'UTR;5'UTR;TSS200;Body;5'UTR;5'UTR;5'UTR;5'UTR	chr22:51016253-51017020	Island	ClassA	chr22:51016253-51017020*Island	10	10	3.088e-12	4.12914e-11	8.37138e-10	2.675e-08	0.876452	0.630461	0.582732	0.0852608	0.0747031	0.0716583	0.293721	1	2
cg24363820	22	51016703			CPT1B;CPT1B;CPT1B;CHKB-CPT1B;CPT1B;CPT1B;CPT1B;CPT1B	NM_152246;NM_001145135;NM_001145137;NR_027928;NM_152245;NM_001145136;NM_004377;NM_001145134	5'UTR;5'UTR;TSS200;Body;5'UTR;5'UTR;5'UTR;5'UTR	chr22:51016253-51017020	Island	ClassA	chr22:51016253-51017020*Island	10	10	3.088e-12	1.44685e-10	8.37138e-10	7.77291e-08	0.821356	0.567373	0.521884	0.0939968	0.0679458	0.0685823	0.299473	1	2
cg14188106	6	32063895		rs41270458	TNXB	NM_019105	Body	chr6:32063533-32065044	Island	ClassA	chr6:32063533-32065044*Island	51	43	0.000104028	5.13036e-05	0.00180139	0.00327813	0.697592	0.443804	0.394076	0.13235	0.181899	0.144501	0.303516	1	2
cg00084338	6	170595920		rs7759322	DLL1	NM_005618	Body	chr6:170597246-170597499	N_Shore	ClassA	chr6:170597246-170597499*N_Shore	4	4	5.02526e-07	1.28947e-08	2.1225e-05	3.39131e-06	0.86305	0.54522	0.555354	0.0904944	0.17311	0.116608	0.307696	1	2
cg00573770	2	145278485			ZEB2;ZEB2;ZEB2	NR_033258;NM_014795;NM_001171653	TSS1500;TSS1500;TSS1500	chr2:145281736-145282269	N_Shelf	ClassA	chr2:145281736-145282269*N_Shelf	9	9	4.05765e-13	1.27877e-12	1.34906e-10	1.41719e-09	0.771152	0.307993	0.463003	0.0771706	0.079409	0.104047	0.308149	1	2
cg27436995	16	743998			FBXL16	NM_153350	3'UTR	chr16:743924-745943	Island	ClassA	chr16:743924-745943*Island	10	10	3.30002e-06	0.000702337	0.000105249	0.0251289	0.576787	0.489797	0.264765	0.167975	0.186946	0.168445	0.312022	1	2
cg16672562	19	46801672			HIF3A;HIF3A;HIF3A	NM_022462;NM_152795;NM_022462	5'UTR;Body;1stExon	chr19:46800053-46800603	S_Shore	ClassA	chr19:46800053-46800603*S_Shore	3	3	2.60247e-11	1.10753e-12	5.11813e-09	1.25102e-09	0.905727	0.573289	0.593023	0.0583387	0.134807	0.145593	0.312704	1	2
cg06758350	21	36259460			RUNX1;RUNX1;RUNX1;RUNX1;RUNX1	NM_001122607;NM_001001890;NM_001001890;NM_001122607;NM_001754	5'UTR;1stExon;5'UTR;1stExon;Body	chr21:36258952-36259472	Island	ClassA	chr21:36258952-36259472*Island	4	4	4.81245e-08	1.98443e-08	2.89818e-06	4.94594e-06	0.708616	0.332878	0.392439	0.0782516	0.100405	0.12618	0.316177	1	2
cg13518079	20	2675072			EBF4	NM_001110514	Body	chr20:2672904-2674698	S_Shore	ClassA	chr20:2672904-2674698*S_Shore	4	3	5.79157e-10	1.78722e-11	7.55394e-08	1.33444e-08	0.613926	0.303266	0.296799	0.0749953	0.0976064	0.09872	0.317128	1	2
cg12477880	21	36259241			RUNX1;RUNX1;RUNX1	NM_001001890;NM_001122607;NM_001754	1stExon;1stExon;Body	chr21:36258952-36259472	Island	ClassA	chr21:36258952-36259472*Island	4	4	4.81245e-08	3.49941e-07	2.89818e-06	5.5804e-05	0.762125	0.326011	0.402248	0.0828441	0.139025	0.168279	0.359877	1	2
cg00994804	21	36259383			RUNX1;RUNX1;RUNX1	NM_001001890;NM_001122607;NM_001754	1stExon;1stExon;Body	chr21:36258952-36259472	Island	ClassA	chr21:36258952-36259472*Island	4	4	4.81245e-08	1.0682e-07	2.89818e-06	2.01963e-05	0.733085	0.295544	0.364629	0.0989901	0.129095	0.158189	0.368456	1	2
cg02869559	21	36259067	rs2843956		RUNX1;RUNX1;RUNX1	NM_001001890;NM_001122607;NM_001754	Body;Body;Body	chr21:36258952-36259472	Island	ClassA	chr21:36258952-36259472*Island	4	4	4.81245e-08	8.16843e-08	2.89818e-06	1.60644e-05	0.772972	0.324576	0.394817	0.0753164	0.132267	0.166116	0.378155	1	2
cg06847624	5	176827671			PFN3	NM_001029886	TSS200	chr5:176827081-176827754	Island	ClassA	chr5:176827081-176827754*Island	4	3	1.78817e-18	1.08724e-20	6.56447e-15	3.83168e-16	0.799682	0.428478	0.39234	0.0731198	0.130198	0.0738264	0.407343	1	2
